# Supplementary material
Source: HighWire-hosted journal article supplement (doi:10.1101/rna.076760.120)
Supplement: Supplemental_Data_1.xlsx [file Supplemental_Data_1.xlsx]

## Sheet: Overview
					Analysis	Unfertilized egg		32 cell		12 somite		Protruding mouth		Adult tail		Green = sites that have been bracode corrected (see material and methods)
		Position			Early/late rRNA:	Early		Early		Early		Late		Late		RMS = RiboMeth-seq score
RNA	Nucl.	Early	Late	Human	Modification	RMS	stdev	RMS	stdev	RMS	stdev	RMS	stdev	RMS	stdev	stdev = Standard deviation
18S	A	27	27	27	Am27	0.989433	0.00443461	0.985085	0.00427751	0.981331	0.00113903	0.990449	0.00149407	0.964631	0.0173246
18S	A	99	99	99	Am99	0.941108	0.0137228	0.940109	0.00991853	0.955742	0.00998396	0.944144	0.0153927	0.894189	0.040171
18S	U	116	116	116	Um116	0.963657	0.00427832	0.964641	0.0100322	0.951066	0.00976918	0.946843	0.0170684	0.967355	0.00856609
18S	U	121	121	121	Um121	0.900167	0.0411291	0.939522	0.0229232	0.932921	0.0189596	0.899715	0.0328052	0.950218	0.00192934
18S	A	164	163	166	Am166	0.963015	0.0160296	0.937709	0.00753494	0.964046	0.020742	0.955189	0.0119938	0.926555	0.00577632
18S	U	170	169	172	Um172	0.934926	0.0468856	0.959	0.0115306	0.908739	0.0232928	0.89128	0.0240093	0.941526	0.000250507
18S	U	333	296	286	Um286	0.973213	0.012551	0.924254	0.00366031	0.901127	0.0250344	0.947392	0.0162275	0.954451	0.00736094
18S	U	334	297	287	Um287	0.984403	0.0052377	0.967243	0.00258351	0.964899	0.0219047	0.943366	0.0110006	0.878522	0.00132757
18S	C	392	356	346	Cm346	0.843313	0.0408728	0.480276	0.188722	0.628204	0.113763	0.585278	0.0908893	0.921534	0.00208727
18S	U	400	364	354	Um354	0.492562	0.0134598	0.427547	0.0745292	0.396039	0.100799	0.238527	0.228066	0.654586	0.032673
18S	U	474	438	428	Um428	0.94341	0.0203204	0.965006	0.0117391	0.94956	0.00472198	0.906869	0.0109686	0.963696	0.00913169
18S	G	482	446	436	Gm436	0.563307	0.014195	0.507593	0.0730201	0.467832	0.0559089	0.645874	0.053035	0.928786	0.0297837
18S	C	508	472	462	Cm462	0.941725	0.0452821	0.925598	0.0499747	0.92603	0.0570763	0.974379	0.0184524	0.969987	0.0300127
18S	A	514	478	468	Am468	0.909665	0.0449008	0.924409	0.0314343	0.843285	0.0580835	0.837234	0.0278267	0.814426	0.0348923
18S	A	530	494	484	Am484	0.893052	0.0807128	0.951225	0.0123267	0.963739	0.00815146	0.931673	0.0414951	0.939501	0.0189927
18S	G	555	519	509	Gm509	0.878107	0.021671	0.808068	0.0221955	0.965894	0.00951087	0.919305	0.0542623	0.920831	0.0321466
18S	A	558	522	512	Am512	0.97667	0.00445325	0.970595	0.0107273	0.980448	0.015973	0.933728	0.050674	0.961709	0.0124804
18S	C	563	527	517	Cm517	0.954525	0.0101398	0.918743	0.0364315	0.936313	0.0289686	0.935055	0.0591269	0.928467	0.0230681
18S	G	647	611	601	Gm601	0.967303	0.00770572	0.960571	0.00284273	0.957451	0.0148815	0.958039	0.023248	0.954927	0.0120417
18S	U	673	637	627	Um627	0.951644	0.0367648	0.972952	0.00964233	0.944934	0.0239828	0.96274	0.0211151	0.959944	0.034825
18S	G	690	654	644	Gm644	0.95058	0.0116083	0.954521	0.00990447	0.926041	0.013663	0.905185	0.0235402	0.941081	0.00345627
18S	A	714	678	668	Am668	0.861841	0.0247493	0.892186	0.0233823	0.885492	0.0250155	0.871004	0.0214964	0.891864	0.0202075
18S	U	853	815	799	Um799	0.971844	0.00262675	0.945967	0.00546406	0.950688	0.00827597	0.915677	0.0342085	0.952906	0.00819082
18S	A	1095	1052	1031	Am1031	0.970178	0.00935647	0.962927	0.00520286	0.962214	0.00233379	0.970943	0.00745405	0.975543	0.00457605
18S	C	1339	1294	1272	Cm1272	0.38097	0.152341	0.587711	0.123215	0.626264	0.140644	0.553488	0.088451	0.55515	0.0219728
18S	U	1355	1310	1288	Um1288	0.948978	0.0211849	0.9124	0.0182458	0.948726	0.0214615	0.936544	0.0301516	0.9295	0.0350188
18S	G	1389	1344	1322	Gm1322	0.891279	0.0293288	0.877203	0.0191843	0.851781	0.0322089	0.901123	0.0208244	0.923185	0.00473061
18S	U	1393	1348	1326	Um1326	0.93731	0.0509831	0.917219	0.0278701	0.932732	0.0516403	0.950118	0.0181118	0.967319	0.00397058
18S	G	1395	1350	1328	Gm1328	0.934765	0.0262537	0.925869	0.0329404	0.944414	0.0188251	0.947439	0.0447553	0.914122	0.0332353
18S	A	1450	1405	1383	Am1383	0.982706	0.0064722	0.966632	0.0159823	0.934693	0.0541214	0.963808	0.0360832	0.947358	0.0250474
18S	U	1507	1461	1442	Um1442	0.987384	0.00444295	0.961579	0.0206811	0.940632	0.0379997	0.915077	0.0729038	0.931527	0.0223292
18S	G	1555	1509	1490	Gm1490	0.94259	0.0399842	0.886694	0.0709081	0.939144	0.0221419	0.950792	0.0187493	0.988144	0.0118556
18S	A	1702	1656	1637	Am1637	0.832912	0.0370305	0.839152	0.0399566	0.913369	0.0325028	0.922401	0.0133953	0.78671	0.0192075
18S	A	1743	1697	1678	Am1678	0.924406	0.015225	0.940232	0.0429686	0.876761	0.0363021	0.819026	0.0591783	0.667965	0.00687176
18S	C	1768	1722	1703	Cm1703	0.914503	0.0559804	0.951293	0.00526535	0.969069	0.0181901	0.978282	0.0118238	0.929581	0.0126245
RNA	Nucl.	Early	Late	Human	Modification	RMS	stdev	RMS	stdev	RMS	stdev	RMS	stdev	RMS	stdev
28S	A	400	398	389	Am389	0.95781	0.0173511	0.912052	0.0653813	0.926904	0.0117933	0.920565	0.0074627	0.881364	0.0132103
28S	A	402	400	391	Am391	0.949719	0.0346044	0.939261	0.0330936	0.932934	0.017424	0.928577	0.0110039	0.972167	0.00858864
28S	G	925	913	1303	Gm1303	0.970427	0.00338084	0.98252	0.00437198	0.961691	0.0100185	0.939985	0.0234912	0.924424	0.0110206
28S	A	932	920	1310	Am1310	0.956535	0.0295318	0.959942	0.0178004	0.909981	0.0564868	0.946508	0.0506136	0.842705	0.0206027
28S	A	935	923	1313	Am1313	0.969901	0.00592787	0.962695	0.0212014	0.930151	0.0302637	0.964417	0.0171303	0.965405	0.00424437
28S	G	1120	1109	1509	Gm1509	0.913263	0.022121	0.928131	0.0519227	0.916838	0.0249077	0.933273	0.0112909	0.864057	0.0830242
28S	A	1122	1111	1511	Am1511	0.953624	0.0369049	0.941585	0.0442052	0.976526	0.0166399	0.892373	0.063299	0.949467	0.0312355
28S	A	1132	1121	1521	Am1521	0.839086	0.0630221	0.891328	0.0291062	0.883545	0.0353312	0.962061	0.0149251	0.964552	0.00672664
28S	G	1223	1212	1612	Gm1612	0.927003	0.0103685	0.896358	0.0254245	0.898558	0.049882	0.929947	0.00685897	0.902071	0.000146651
28S	A	1454	1437	1858	Am1858	0.973777	0.00899454	0.981642	0.00477221	0.977172	0.00650346	0.978631	0.00654294	0.98646	0.00131367
28S	C	1785	1770	2338	Cm2338	0.961334	0.0119271	0.935129	0.0574212	0.834634	0.0549154	0.945499	0.0323778	0.907211	0.0137915
28S	A	1797	1782	2350	Am2350	0.984901	0.00447222	0.983385	0.00418722	0.982087	0.00618963	0.978924	0.00562677	0.989134	0.000469146
28S	G	1798	1783	2351	Gm2351	0.992655	0.00258132	0.986645	0.00537208	0.988204	0.00113289	0.98239	0.00938477	0.985524	0.00169426
28S	C	1799	1784	2352	Cm2352	0.911094	0.0509839	0.921027	0.0309832	0.929378	0.0376719	0.891818	0.00657444	0.956968	0.0136132
28S	U	1849	1834	2402	Um2402	0.96023	0.00635842	0.955289	0.0157162	0.914436	0.0514833	0.948531	0.0368332	0.961274	0.00327239
28S	G	1858	1843	2411	Gm2411	0.974622	0.0105319	0.968607	0.0189083	0.982082	0.00299954	0.97461	0.00529449	0.946414	0.00926577
28S	A	2222	2206	2774	Am2774	0.872598	0.0571079	0.913517	0.0521341	0.945422	0.00814347	0.932688	0.0144891	0.921393	0.0120335
28S	C	2239	2223	2791	Cm2791	0.97244	0.00643513	0.988329	0.0056414	0.977841	0.00618438	0.980083	0.00595934	0.982858	0.00744771
28S	A	2250	2234	2802	Am2802	0.98758	0.0052798	0.965295	0.0135471	0.942721	0.0207686	0.973569	0.0154947	0.989398	0.00428306
28S	G	2265	2249	2817	Gm2817	0.777019	0.0272934	0.694687	0.0462506	0.734244	0.0363593	0.808339	0.0287689	0.962544	0.0133484
28S	G	2272	2256	2824(U)	Um2824(G)	0.968344	0.0124087	0.942056	0.0233147	0.955209	0.0130752	0.937498	0.0117908	0.949662	0.0024041
28S	C	2297	2280	2848	Cm2848	0.891549	0.0757023	0.969689	0.00772218	0.900441	0.0344782	0.826033	0.0671684	0.866618	0.0747204
28S	G	2312	2295	2863	Gm2863	0.944812	0.023368	0.904031	0.0378642	0.938656	0.0161798	0.914194	0.0212555	0.962526	0.0121275
28S	G	2887	2775	3606	Gm3606	0.888398	0.0498994	0.859553	0.0344831	0.864993	0.0460325	0.913512	0.00481168	0.935945	0.0210769
28S	C	2961	2849	3680	Cm3680	0.94946	0.0312602	0.975532	0.00663878	0.945087	0.0543507	0.923028	0.0522503	0.896682	0.0594798
28S	A	2978	2866	3697	Am3697	0.917825	0.0461055	0.856221	0.0585362	0.927458	0.0566449	0.874194	0.0551636	0.865807	0.0669169
28S	A	2984	2872	3703	Am3703	0.96254	0.00211681	0.961795	0.00608483	0.951552	0.00750358	0.969119	0.0186876	0.979652	0.00356797
28S	G	3004	2892	3723	Gm3723	0.953346	0.0040341	0.931186	0.0169393	0.897772	0.0170535	0.881794	0.0608172	0.876727	0.0803205
28S	A	3020	2908	3739	Am3739	0.981167	0.00362476	0.98297	0.00771587	0.969761	0.0193212	0.978671	0.0108118	0.973105	0.00844069
28S	A	3045	2933	3764	Am3764	0.932982	0.0298061	0.949615	0.0101932	0.946254	0.0213222	0.920681	0.025397	0.891572	0.0259496
28S	G	3052	2940	3771	Gm3771	0.971713	0.0114568	0.96083	0.0133646	0.911171	0.0338003	0.937594	0.0334986	0.961877	0.0200537
28S	C	3068	2956	3787	Cm3787	0.924901	0.012686	0.894081	0.0340375	0.927072	0.0380853	0.941462	0.0150921	0.933438	0.0167137
28S	U	3078	2966	3797	ᴪm3797	0.96165	0.0168855	0.882538	0.0409246	0.902791	0.0281713	0.901715	0.0652894	0.935221	0.0121069
28S	A	3085	2973	3804	Am3804	0.94843	0.010267	0.938772	0.0272709	0.918771	0.0237202	0.887821	0.0510404	0.944327	0.00470257
28S	A	3090	2978	3809	Am3809	0.954435	0.0310843	0.958609	0.00779071	0.943112	0.0190511	0.951677	0.0168729	0.94773	0.0104475
28S	C	3101	2989	3820	Cm3820	0.884693	0.0611976	0.903692	0.0173414	0.92463	0.0230398	0.916209	0.0575562	0.711551	0.0423094
28S	C	3129	3017	3848	Cm3848	0.953632	0.0133578	0.962678	0.0170032	0.909004	0.0416602	0.921806	0.00693531	0.853157	0.0549922
28S	C	3147	3035	3866	Cm3866	0.921251	0.0423481	0.94676	0.0165945	0.879043	0.0311883	0.878733	0.0165372	0.938743	0.0207028
28S	G	3159	3047	3878	Gm3878	0.91892	0.0148635	0.938401	0.0117454	0.929408	0.0154879	0.925174	0.0211484	0.912588	0.0223741
28S	U	3185	3073	3904	Um3904	0.96418	0.0219196	0.918566	0.0482734	0.759397	0.209518	0.958222	0.0104096	0.911534	0.00708713
28S	C	3197	3085	3916	Cm3916	0.0193139	0.027314	0.364478	0.121359	0.429391	0.209802	0.733145	0.0502938	0.90112	0.00315109
28S	G	3204	3092	3923	Gm3923	0.771014	0.0956683	0.535498	0.1356	0.639271	0.178685	0.929873	0.0147983	0.960189	0.0204753
28S	C	3273	3167	4032	Cm4032	0.937074	0.0442131	0.912588	0.0659014	0.886708	0.0561253	0.983908	0.0114524	0.91402	0.0464902
28S	G	3464	3314	4166	Gm4166	0.943434	0.0014088	0.950775	0.0153496	0.94619	0.0267836	0.960689	0.00921159	0.946891	0.0269323
28S	U	3495	3345	4197	Um4197	0.935926	0.0187715	0.95724	0.00893565	0.953479	0.0133835	0.954669	0.00427251	0.962218	0.00251233
28S	G	3496	3346	4198	Gm4198	0.975721	0.00754723	0.982699	0.00222611	0.988615	0.00555103	0.98549	0.00144868	0.985	0.00593963
28S	U	3570	3420	4272	Um4272	0.849874	0.100853	0.602731	0.183147	0.651291	0.11663	0.721602	0.106571	0.637044	0.0842072
28S	U	3574	3424	4276	Um4276	0.968536	0.0107944	0.971325	0.00709464	0.935856	0.0256659	0.900503	0.00582299	0.974786	0.0030811
28S	G	3638	3488	4340	Gm4340	0.952597	0.0131898	0.902238	0.0247355	0.93169	0.0133183	0.932741	0.0316274	0.950706	0.0112662
28S	G	3660	3510	4362	Gm4362	0.972666	0.0110055	0.949075	0.017175	0.961499	0.0207773	0.961914	0.00302912	0.967698	0.00873833
28S	C	3724	3574	4426	Cm4426	0.90141	0.0514787	0.953771	0.00112811	0.924018	0.0276049	0.939454	0.0349366	0.97099	0.00116829
28S	G	3762	3612	4464	Gm4464	0.94432	0.0149951	0.9431	0.0129613	0.924117	0.0238109	0.906448	0.0111076	0.943986	0.00920892
28S	U	3766	3616	4468	Um4468	0.978163	0.00836597	0.95941	0.0119603	0.957316	0.00735909	0.968445	0.00159645	0.979136	0.00299162
28S	G	3767	3617	4469	Gm4469	0.904095	0.0391999	0.885856	0.0446099	0.94592	0.0107207	0.929245	0.0448382	0.802642	0.0609757
28S	A	3791	3641	4493	Am4493	0.968289	0.00757802	0.953513	0.0268396	0.981552	0.00767939	0.984246	0.00685407	0.96677	0.0205774
28S	C	3804	3654	4506	Cm4506	0.904771	0.0460822	0.943589	0.0265274	0.967151	0.00678786	0.968716	0.0112221	0.931406	0.0103898
28S	A	3860	3709	4560	Am4560	0.244688	0.111456	0.393875	0.304882	0.656574	0.174287	0.602256	0.201524	0.896361	0.0306435
28S	U	3890	3739	4590	Um4590	0.843552	0.0430935	0.783269	0.163894	0.88248	0.0471114	0.932709	0.0176046	0.951138	0.0166272
28S	G	3893	3742	4593	Gm4593	0.923293	0.0155099	0.844165	0.0625868	0.901803	0.0214227	0.903981	0.0488853	0.904313	0.00538701
28S	C	4186	4022	4983	Cm4983	0.960912	0.00586163	0.93867	0.0456132	0.911877	0.0149906	0.93691	0.0211009	0.893392	0.0380797
RNA	Nucl.	Early	Late	Human	Modification	RMS	stdev	RMS	stdev	RMS	stdev	RMS	stdev	RMS	stdev
5.8S	U	8	8	8	Um8	0.775991	0.114008	0.865824	0.00796002	0.774547	0.147806	0.553234	0.172342	0.976134	0.00215283
5.8S	U	14	14	14	Um14	0.64589	0.0800875	0.773723	0.0337708	0.705533	0.11145	0.577316	0.118315	0.95453	0.0005105
5.8S	G	75	75	75	Gm75	0.938559	0.0227339	0.91071	0.0270752	0.885274	0.0327999	0.901605	0.0563343	0.920517	0.0201176

## Sheet: Unfertilized egg
Data_handling_v3			AGCTTG_zbf_Unfertilized egg_1						CGCAAT_zbf_Unfertilized egg_2						GGACTT_zbf_Unfertilized egg_3						Average
RNA	Position	Nucl	5'_reads	3'_reads	5'+3'	v5_score	v6_score	Meth%	5'_reads	3'_reads	5'+3'	v5_score	v6_score	Meth%	5'_reads	3'_reads	5'+3'	v5_score	v6_score	Meth%	Av.Meth%	Std.dev.
18S_rRNA_M_Locati	1	U	1106	0	1106	0	0	0	1869	0	1869	0	0	0	173	0	173	0	0	0	0	0
18S_rRNA_M_Locati	2	A	665	0	665	0	0	0	920	0	920	0	0	0	97	0	97	0	0	0	0	0
18S_rRNA_M_Locati	3	C	1189	0	1189	0	0	0	1572	0	1572	0	0	0	179	0	179	0	0	0	0	0
18S_rRNA_M_Locati	4	C	1513	0	1513	0	0	0	1755	0	1755	0	0	0	642	0	642	0	0	0	0	0
18S_rRNA_M_Locati	5	U	1504	0	1504	0	0	0	1298	0	1298	0	0	0	589	0	589	0	0	0	0	0
18S_rRNA_M_Locati	6	G	654	0	654	0	0	0	378	0	378	0	0	0	346	0	346	0	0	0	0	0
18S_rRNA_M_Locati	7	G	849	0	849	0.0976471	0	0.0890558	792	0	792	0.0187754	0	0.0184522	409	0	409	0.114119	0	0	0.035836	0.0383786
18S_rRNA_M_Locati	8	U	1058	0	1058	0.166467	0	0	861	0	861	0.242343	0	0	433	0	433	0.144444	0	0	0	0
18S_rRNA_M_Locati	9	U	970	0	970	0.0661975	0	0	438	0	438	0.402177	0	0.28729	479	0	479	0.211968	0	0	0.0957633	0.13543
18S_rRNA_M_Locati	10	G	571	0	571	0.580536	0.0401782	0.36771	228	0	228	1.24677	0.0919311	0.555998	311	0	311	0.238177	0	0.19286	0.372189	0.148284
18S_rRNA_M_Locati	11	A	413	0	413	1.14423	0.200674	0.534234	94	0	94	3.43626	0.414659	0.776427	217	0	217	0.7158	0.12789	0.4183	0.57632	0.149203
18S_rRNA_M_Locati	12	U	538	0	538	0.851433	0	0.460339	180	0	180	1.14948	0	0.536149	254	0	254	0.477908	0	0.324228	0.440239	0.0876759
18S_rRNA_M_Locati	13	C	772	0	772	0.395242	0	0.283541	227	0	227	0.729337	0	0.422816	366	0	366	0.0544051	0	0.0517316	0.252696	0.153057
18S_rRNA_M_Locati	14	C	1071	0	1071	0.0328773	0	0.0318595	172	0	172	1.22344	0	0.551681	412	0	412	0.0752489	0	0	0.194514	0.25289
18S_rRNA_M_Locati	15	U	1385	5	1390	0.10659	0	0	271	106	377	0.0115814	0	0.0114788	426	9	435	0.100663	0	0	0.00382628	0.00541118
18S_rRNA_M_Locati	16	G	614	8	622	1.34295	0.1075	0.57358	87	53	140	2.313	0.314344	0.699657	119	16	135	2.18995	0.366402	0.688102	0.653779	0.0569055
18S_rRNA_M_Locati	17	C	1014	17	1031	0.489836	0	0.328999	227	119	346	0.458149	0	0.314821	291	73	364	0.148889	0	0.129904	0.257908	0.0906977
18S_rRNA_M_Locati	18	C	3526	55	3581	0.581131	0	0	968	206	1174	0.544558	0	0	689	78	767	0.457769	0	0	0	0
18S_rRNA_M_Locati	19	A	1767	39	1806	0.0126176	0	0.0124672	420	187	607	0.133425	0	0.117889	474	225	699	0.368683	0	0	0.0434522	0.0528805
18S_rRNA_M_Locati	20	G	961	27	988	1.09184	0.0411085	0.522205	222	118	340	1.46452	0.158714	0.594949	183	86	269	0.849835	0.0453944	0.460333	0.525829	0.0550164
18S_rRNA_M_Locati	21	U	3128	54	3182	0.434925	0	0	554	388	942	0.144503	0	0	427	114	541	0.174764	0	0	0	0
18S_rRNA_M_Locati	22	A	1821	73	1894	0.0263559	0	0.0256923	469	519	988	0.0605325	0	0	334	80	414	0.0954485	0	0.0873239	0.0376721	0.0366425
18S_rRNA_M_Locati	23	A	1188	149	1337	0.507823	0	0.336959	326	413	739	0.452643	0	0.31189	221	86	307	0.547475	0	0.35453	0.334459	0.0174973
18S_rRNA_M_Locati	24	U	3534	348	3882	0.563902	0	0	988	783	1771	0.385214	0	0	664	181	845	0.510796	0	0	0	0
18S_rRNA_M_Locati	25	A	1323	315	1638	0.081669	0	0.0755454	517	597	1114	0.118964	0	0.106401	298	146	444	0.00689139	0	0	0.0606489	0.044697
18S_rRNA_M_Locati	26	U	2052	539	2591	0.389639	0	0	766	981	1747	0.247858	0	0	186	268	454	0.0114286	0	0	0	0
18S_rRNA_M_Locati	27	A	6	7	13	128.786	0.979422	0.992841	8	19	27	56.3302	0.953453	0.98317	2	2	4	102.933	0.974741	0.992288	0.989433	0.00443461
18S_rRNA_M_Locati	28	U	403	758	1161	0.31986	0	0.242502	263	1851	2114	0.331111	0	0	49	300	349	0.379333	0	0.275583	0.172695	0.122858
18S_rRNA_M_Locati	29	G	705	369	1074	0.43232	0	0.302028	803	791	1594	0.0238314	0	0	234	192	426	0.186391	0	0.157418	0.153149	0.12334
18S_rRNA_M_Locati	30	C	616	666	1282	0.227739	0	0.185612	645	1516	2161	0.276066	0	0	262	251	513	0.0399049	0	0.0384455	0.074686	0.0799917
18S_rRNA_M_Locati	31	U	254	887	1141	0.384871	0	0.278087	184	1719	1903	0.161718	0	0	173	394	567	0.00989828	0	0	0.0926956	0.131091
18S_rRNA_M_Locati	32	U	147	1453	1600	0.0314734	0	0.0305315	33	2444	2477	0.389481	0	0	153	811	964	0.419678	0	0	0.0101772	0.0143927
18S_rRNA_M_Locati	33	G	411	785	1196	0.49069	0.0253837	0.329354	268	922	1190	0.342728	0	0.255407	254	319	573	0.12077	0	0.107924	0.230895	0.092045
18S_rRNA_M_Locati	34	U	546	842	1388	0.45618	0.130133	0.313426	448	645	1093	0.50261	0.060337	0.334695	247	204	451	0.645846	0.0899334	0.392938	0.34702	0.0336099
18S_rRNA_M_Locati	35	C	793	1607	2400	0.138863	0	0	531	1293	1824	0.197571	0	0	277	517	794	0.0433403	0	0	0	0
18S_rRNA_M_Locati	36	U	1049	1654	2703	0.178049	0	0	880	797	1677	0.159164	0	0	442	291	733	0.124962	0	0.111216	0.037072	0.0524277
18S_rRNA_M_Locati	37	C	1984	1168	3152	0.254523	0	0	1049	430	1479	0.0966517	0	0	788	299	1087	0.230801	0	0	0	0
18S_rRNA_M_Locati	38	A	1476	1394	2870	0.0692209	0	0	716	124	840	0.630955	0.0962839	0.387145	649	168	817	0.13336	0	0.117795	0.168313	0.162038
18S_rRNA_M_Locati	39	A	1462	1146	2608	0.0975171	0	0.0888835	756	148	904	0.394758	0.0142546	0.283254	543	224	767	0.228993	0	0.186523	0.18622	0.0793517
18S_rRNA_M_Locati	40	A	1716	1475	3191	0.0623294	0	0	1147	195	1342	0.096641	0	0	937	358	1295	0.296819	0	0	0	0
18S_rRNA_M_Locati	41	G	1241	1107	2348	0.361653	0.0429184	0.265681	760	203	963	0.264419	0	0.209295	619	384	1003	0.0407924	0	0	0.158325	0.114295
18S_rRNA_M_Locati	42	A	1366	1591	2957	0.0800203	0	0.0741147	833	163	996	0.155132	0	0.134415	708	389	1097	0.123275	0	0	0.0695098	0.0549711
18S_rRNA_M_Locati	43	U	1378	1855	3233	0.0423761	0	0.0406655	853	269	1122	0.0659345	0	0.0619078	486	610	1096	0.0657146	0	0	0.0341911	0.025685
18S_rRNA_M_Locati	44	U	3204	2155	5359	0.407347	0	0	1555	281	1836	0.391974	0	0	822	480	1302	0.217669	0	0	0	0
18S_rRNA_M_Locati	45	A	1602	1665	3267	0.0721474	0	0.0673117	663	174	837	0.5786	0	0.366805	365	370	735	0.564176	0.0629203	0.360999	0.265038	0.139834
18S_rRNA_M_Locati	46	A	2250	1515	3765	0.0990352	0	0	1158	257	1415	0.10561	0	0	410	363	773	0.495894	0.0293518	0.33179	0.110597	0.156407
18S_rRNA_M_Locati	47	G	1254	1177	2431	0.510572	0	0.338091	401	140	541	2.08879	0.0731993	0.676652	411	226	637	0.969854	0.168009	0.49274	0.502495	0.138389
18S_rRNA_M_Locati	48	C	1875	968	2843	0.275234	0	0.21589	518	260	778	1.27167	0	0.560112	778	228	1006	0.272625	0	0.21439	0.330131	0.162623
18S_rRNA_M_Locati	49	C	4588	1142	5730	0.426365	0	0	2639	131	2770	0.385521	0	0	1761	194	1955	0.368519	0	0	0	0
18S_rRNA_M_Locati	50	A	2021	1071	3092	0.127593	0	0.113187	1079	127	1206	0.644555	0	0.39213	1199	175	1374	0.0333899	0	0	0.168439	0.164785
18S_rRNA_M_Locati	51	U	2319	1551	3870	0.173708	0	0	1987	285	2272	0.142924	0	0	1697	262	1959	0.33941	0	0	0	0
18S_rRNA_M_Locati	52	G	791	644	1435	1.35671	0.187178	0.57585	596	187	783	1.85692	0	0.650263	532	202	734	1.00314	0.0850845	0.501125	0.575746	0.0608851
18S_rRNA_M_Locati	53	C	4466	1148	5614	0.49662	0	0	6133	388	6521	0.748029	0	0	2094	351	2445	0.464782	0	0	0	0
18S_rRNA_M_Locati	54	A	1348	747	2095	0.499756	0	0.333331	1302	385	1687	0.315745	0	0.240082	1309	185	1494	0.0489335	0	0	0.191138	0.140414
18S_rRNA_M_Locati	55	A	1973	1041	3014	0.0318592	0	0	1856	576	2432	0.140243	0	0	1242	226	1468	0.0483171	0	0	0	0
18S_rRNA_M_Locati	56	G	1185	702	1887	0.461823	0	0.316037	1045	372	1417	0.450721	0	0.310839	613	282	895	0.54153	0.0504437	0.351548	0.326141	0.0180904
18S_rRNA_M_Locati	57	U	1741	769	2510	0.0329926	0	0.0319512	1560	445	2005	0.0238728	0	0	1079	389	1468	0.134354	0	0	0.0106504	0.0150619
18S_rRNA_M_Locati	58	C	1430	857	2287	0.0730624	0	0.0681154	1090	549	1639	0.133225	0	0.117626	719	357	1076	0.131579	0	0.116375	0.100705	0.0230503
18S_rRNA_M_Locati	59	U	2209	1109	3318	0.28369	0	0	1134	698	1832	0.00770443	0	0	818	546	1364	0.139707	0	0	0	0
18S_rRNA_M_Locati	60	A	1236	654	1890	0.222017	0	0.181759	584	383	967	0.632645	0.100359	0.387742	584	331	915	0.20148	0	0.167846	0.245782	0.100541
18S_rRNA_M_Locati	61	A	1239	970	2209	0.0819608	0	0.0757838	459	622	1081	0.452331	0.0137347	0.31165	660	415	1075	0.0201673	0	0	0.129145	0.132708
18S_rRNA_M_Locati	62	G	788	604	1392	0.741557	0.080732	0.425977	597	508	1105	0.366797	0	0.26854	575	353	928	0.0956345	0	0.0873727	0.26063	0.138348
18S_rRNA_M_Locati	63	U	1399	936	2335	0.0198773	0	0.0194981	1182	832	2014	0.19839	0	0	686	410	1096	0.0875519	0	0	0.00649935	0.00919147
18S_rRNA_M_Locati	64	G	622	886	1508	0.668095	0.0678584	0.400673	387	528	915	1.01295	0.0685344	0.503491	275	279	554	0.873173	0.198766	0.466595	0.45692	0.0425292
18S_rRNA_M_Locati	65	C	1897	1358	3255	0.275229	0	0	933	1119	2052	0.134952	0	0	450	701	1151	0.161323	0	0	0	0
18S_rRNA_M_Locati	66	A	517	1261	1778	0.865268	0	0.464024	402	499	901	1.42844	0.132495	0.588482	203	336	539	1.25109	0.0322155	0.556228	0.536245	0.0527383
18S_rRNA_M_Locati	67	C	2707	2021	4728	0.284913	0	0	1247	974	2221	0.0458996	0	0.0439042	537	845	1382	0.00961678	0	0.009532	0.0178121	0.0188558
18S_rRNA_M_Locati	68	A	723	942	1665	1.4274	0	0.588183	562	794	1356	0.968648	0.105563	0.492221	332	385	717	1.26171	0.0198419	0.558201	0.546202	0.0400843
18S_rRNA_M_Locati	69	C	1210	1635	2845	0.460998	0	0.315612	839	4276	5115	0.534793	0	0	355	883	1238	0.351188	0	0.260066	0.191893	0.137571
18S_rRNA_M_Locati	70	G	1061	1585	2646	0.810515	0	0.447764	732	2186	2918	0.276758	0	0.216824	293	853	1146	0.61889	0	0.382499	0.349029	0.097206
18S_rRNA_M_Locati	71	G	753	1693	2446	1.09871	0	0.52362	569	1019	1588	1.63661	0	0.620874	474	545	1019	0.99098	0	0.49798	0.547491	0.0529345
18S_rRNA_M_Locati	72	C	7187	9430	16617	0.762445	0	0	1979	3589	5568	0.240827	0	0	2801	1642	4443	0.586439	0	0	0	0
18S_rRNA_M_Locati	73	C	3876	1950	5826	0.0788208	0	0	2760	1375	4135	0.133422	0	0.117741	4176	926	5102	0.629654	0	0	0.0392471	0.0555037
18S_rRNA_M_Locati	74	G	1918	2066	3984	0.355893	0	0.262527	1719	1419	3138	0.575682	0	0.365428	1338	768	2106	0.0592364	0	0.0559488	0.227968	0.128686
18S_rRNA_M_Locati	75	G	973	1247	2220	1.53968	0	0.606357	958	570	1528	2.52072	0	0.7161	529	526	1055	1.2601	0.0340891	0.557776	0.626744	0.0662238
18S_rRNA_M_Locati	76	U	7544	2181	9725	0.522448	0	0	19092	1069	20161	0.845657	0	0	1106	1219	2325	0.0527181	0	0	0	0
18S_rRNA_M_Locati	77	A	1179	1285	2464	1.15145	0	0.535298	1296	711	2007	1.52275	0	0.603726	555	875	1430	0.582095	0	0.368089	0.502371	0.0989758
18S_rRNA_M_Locati	78	C	5899	2205	8104	0.455939	0	0	5937	1072	7009	0.393774	0	0	1958	1169	3127	0.358983	0	0	0	0
18S_rRNA_M_Locati	79	A	1397	1926	3323	0.211368	0	0.174531	1097	1089	2186	0.987375	0	0.496938	844	1041	1885	0.00421822	0	0.00420272	0.225224	0.204327
18S_rRNA_M_Locati	80	G	831	929	1760	1.2002	0.110317	0.545637	793	813	1606	1.51884	0	0.603141	659	634	1293	0.311223	0	0.237493	0.46209	0.16054
18S_rRNA_M_Locati	81	U	1670	1741	3411	0.025609	0	0.0249767	1964	1311	3275	0.0947158	0	0.086545	906	1074	1980	0.230058	0	0	0.0371739	0.0363693
18S_rRNA_M_Locati	82	G	993	1426	2419	0.429394	0	0.30049	817	933	1750	1.00176	0	0.500582	473	826	1299	0.186479	0	0.157272	0.319448	0.140795
18S_rRNA_M_Locati	83	A	1011	1384	2395	0.271397	0	0.213534	778	1027	1805	0.380245	0	0.275601	437	838	1275	0.124756	0	0.110996	0.200044	0.0678736
18S_rRNA_M_Locati	84	A	1049	1603	2652	0.0981656	0	0.0894212	773	912	1685	0.426717	0	0.299214	335	878	1213	0.110772	0	0.0997996	0.162812	0.0965443
18S_rRNA_M_Locati	85	A	875	1602	2477	0.0464577	0	0.0444123	757	1076	1833	0.133097	0	0.11752	328	622	950	0.288679	0.0119305	0.224194	0.128709	0.0738209
18S_rRNA_M_Locati	86	C	996	1596	2592	0.0452457	0	0	1009	1290	2299	0.144961	0	0	321	712	1033	0.108919	0	0.0983066	0.0327689	0.0463422
18S_rRNA_M_Locati	87	U	1209	1984	3193	0.248925	0	0	1270	1603	2873	0.357237	0	0	197	1007	1204	0.110115	0	0	0	0
18S_rRNA_M_Locati	88	G	846	1079	1925	0.328505	0.00359135	0.247371	736	775	1511	0.266931	0	0.210801	288	591	879	0.252247	0	0.201619	0.21993	0.0197621
18S_rRNA_M_Locati	89	C	1676	1814	3490	0.315296	0	0	1674	1551	3225	0.478987	0	0	399	835	1234	0.145587	0	0	0	0
18S_rRNA_M_Locati	90	G	498	1157	1655	0.623202	0.0955481	0.384077	307	706	1013	0.888034	0.151356	0.470594	53	549	602	0.909803	0.186003	0.4768	0.443824	0.0423234
18S_rRNA_M_Locati	91	A	830	1249	2079	0.320785	0	0.242963	638	715	1353	0.382882	0	0.27702	190	754	944	0.220423	0	0.180769	0.233584	0.0398503
18S_rRNA_M_Locati	92	A	575	923	1498	1.03841	0.204993	0.509589	547	593	1140	0.784887	0.0335473	0.439956	251	819	1070	0.164094	0	0.141076	0.36354	0.159854
18S_rRNA_M_Locati	93	U	364	1758	2122	0.392343	0	0.281882	351	677	1028	0.913001	0	0.477504	122	573	695	0.841746	0.0524167	0.457394	0.405593	0.0878616
18S_rRNA_M_Locati	94	G	1163	2926	4089	0.281638	0	0	704	1399	2103	0.0929024	0	0	352	1757	2109	0.430906	0	0	0	0
18S_rRNA_M_Locati	95	G	972	1919	2891	0.214346	0	0.176562	642	1081	1723	0.328687	0	0.247485	350	868	1218	0.185352	0	0.156477	0.193508	0.0390383
18S_rRNA_M_Locati	96	C	1246	2870	4116	0.12419	0	0	599	1559	2158	0.106582	0	0.096357	407	1188	1595	0.0655876	0	0	0.032119	0.0454231
18S_rRNA_M_Locati	97	U	1724	2634	4358	0.109508	0	0	768	1558	2326	0.132913	0	0.117364	643	1007	1650	0.016172	0	0	0.0391214	0.0553261
18S_rRNA_M_Locati	98	C	2840	3081	5921	0.353499	0	0	1516	3162	4678	0.464192	0	0	954	1467	2421	0.342499	0	0	0	0
18S_rRNA_M_Locati	99	A	67	173	240	18.1986	0.843688	0.948118	65	182	247	11.7615	0.732797	0.92193	26	63	89	20.1751	0.868215	0.953275	0.941108	0.0137228
18S_rRNA_M_Locati	100	U	2492	2938	5430	0.180298	0	0	999	2367	3366	0.0498399	0	0	919	1205	2124	0.143681	0	0	0	0
18S_rRNA_M_Locati	101	U	4659	3354	8013	0.443599	0	0	2620	4006	6626	0.529341	0	0	1023	1802	2825	0.338551	0	0	0	0
18S_rRNA_M_Locati	102	A	2741	2384	5125	0.0402848	0	0	797	2949	3746	0.0461495	0	0	688	1397	2085	0.0151593	0	0	0	0
18S_rRNA_M_Locati	103	A	2567	2129	4696	0.0440683	0	0.0422169	1071	2464	3535	0.0207736	0	0.0203565	1145	1259	2404	0.159972	0	0	0.0208578	0.0172386
18S_rRNA_M_Locati	104	A	1165	1327	2492	1.12446	0.0538295	0.529392	294	1563	1857	1.17366	0.0401522	0.540081	632	713	1345	0.650017	0	0.394123	0.487865	0.0664293
18S_rRNA_M_Locati	105	U	1512	1357	2869	0.795834	0	0.443242	628	1532	2160	0.86278	0	0.463283	738	604	1342	0.645925	0	0.392617	0.433047	0.0297364
18S_rRNA_M_Locati	106	C	5859	3128	8987	0.484655	0	0	3608	3289	6897	0.453677	0	0	1852	1162	3014	0.302023	0	0	0	0
18S_rRNA_M_Locati	107	A	4912	3144	8056	0.439229	0	0	2787	2981	5768	0.321369	0	0	2704	1056	3760	0.478496	0	0	0	0
18S_rRNA_M_Locati	108	G	2953	1044	3997	0.138264	0	0.121496	1458	1207	2665	0.512545	0	0.338947	1905	368	2273	0.122017	0	0	0.153481	0.140211
18S_rRNA_M_Locati	109	U	1510	981	2491	0.769645	0	0.435014	583	1369	1952	1.05281	0.0195533	0.512992	819	275	1094	0.828412	0.0104149	0.453304	0.467103	0.0332962
18S_rRNA_M_Locati	110	U	4568	2109	6677	0.471936	0	0	2490	4050	6540	0.500178	0	0	2136	620	2756	0.412554	0	0	0	0
18S_rRNA_M_Locati	111	A	1175	1599	2774	0.359732	0	0.264631	939	2847	3786	0.0777015	0	0	1191	362	1553	0.0677392	0	0.0634799	0.10937	0.112803
18S_rRNA_M_Locati	112	U	1255	2175	3430	0.00307652	0	0	1084	3696	4780	0.331686	0	0	953	440	1393	0.127172	0	0.112896	0.0376319	0.0532196
18S_rRNA_M_Locati	113	G	741	1544	2285	0.299324	0	0.230447	737	2648	3385	0.142774	0	0	955	273	1228	0.139644	0	0.12262	0.117689	0.0941441
18S_rRNA_M_Locati	114	G	864	921	1785	0.421028	0	0.296401	656	1428	2084	0.274207	0	0.215279	697	220	917	0.346103	0	0.257323	0.256334	0.033125
18S_rRNA_M_Locati	115	U	542	1066	1608	0.387964	0	0.279645	425	1404	1829	0.306369	0	0.234618	343	288	631	0.755468	0	0.430739	0.315001	0.0838787
18S_rRNA_M_Locati	116	U	17	51	68	31.3982	0.879448	0.969568	31	60	91	24.9202	0.880051	0.961823	22	23	45	23.2249	0.862286	0.959581	0.963657	0.00427832
18S_rRNA_M_Locati	117	C	1615	959	2574	0.383599	0	0	928	897	1825	0.0293538	0	0	876	231	1107	0.222112	0	0	0	0
18S_rRNA_M_Locati	118	C	1077	1131	2208	0.317243	0	0	838	876	1714	0.0931325	0	0	918	314	1232	0.353618	0	0	0	0
18S_rRNA_M_Locati	119	U	786	958	1744	0.141509	0	0	672	801	1473	0.0792175	0	0	762	351	1113	0.300229	0	0	0	0
18S_rRNA_M_Locati	120	U	751	757	1508	0.0420146	0	0	635	664	1299	0.0772479	0	0	780	378	1158	0.374528	0	0	0	0
18S_rRNA_M_Locati	121	U	21	48	69	22.2797	0.857166	0.957632	70	104	174	6.29733	0.648109	0.86364	46	56	102	7.20949	0.664801	0.87923	0.900167	0.0411291
18S_rRNA_M_Locati	122	G	504	717	1221	0.267403	0	0.211121	426	760	1186	0.0325938	0	0	273	364	637	0.24279	0	0.195606	0.135576	0.0960755
18S_rRNA_M_Locati	123	A	260	787	1047	0.630715	0.024632	0.386998	284	707	991	0.322054	0	0.243787	143	489	632	0.326101	0	0.246203	0.29233	0.0669482
18S_rRNA_M_Locati	124	U	278	1059	1337	0.293431	0	0.226994	351	714	1065	0.384251	0	0.277776	161	588	749	0.118104	0	0.105755	0.203508	0.0721641
18S_rRNA_M_Locati	125	C	165	2782	2947	0.461047	0	0	169	1464	1633	0.116388	0	0	113	858	971	0.170428	0	0	0	0
18S_rRNA_M_Locati	126	G	133	1060	1193	1.23515	0	0.552809	98	600	698	1.61043	0.13326	0.617259	69	434	503	1.01883	0	0.505159	0.558409	0.0459356
18S_rRNA_M_Locati	127	C	392	1918	2310	0.828333	0	0.453161	430	1070	1500	0.445525	0	0.308352	188	916	1104	0.571121	0	0.363721	0.375078	0.0596609
18S_rRNA_M_Locati	128	U	419	1892	2311	1.37144	0	0.578421	377	1262	1639	0.585928	0	0.369597	123	769	892	1.71408	0	0.631812	0.52661	0.113145
18S_rRNA_M_Locati	129	C	425	1780	2205	1.82222	0	0.645773	517	2111	2628	0.0397532	0	0.0382473	91	880	971	1.87047	0	0.651859	0.445293	0.287836
18S_rRNA_M_Locati	130	C	612	2088	2700	1.50951	0	0.601605	1115	3362	4477	0.400325	0	0	117	1169	1286	1.39512	0	0.582674	0.39476	0.279244
18S_rRNA_M_Locati	131	A	367	1483	1850	3.20403	0.091813	0.762231	329	785	1114	2.3714	0.12314	0.703574	76	797	873	3.05468	0	0.753584	0.739797	0.025855
18S_rRNA_M_Locati	132	C	3233	13203	16436	0.596357	0	0	969	4161	5130	0.300972	0	0	994	2614	3608	0.00953788	0	0	0	0
18S_rRNA_M_Locati	133	C	15215	12768	27983	0.801624	0	0	3595	3531	7126	0.506843	0	0	8930	5457	14387	0.82181	0	0	0	0
18S_rRNA_M_Locati	134	C	12806	1214	14020	0.503691	0	0	4334	899	5233	0.282902	0	0	6876	1652	8528	0.617173	0	0	0	0
18S_rRNA_M_Locati	135	G	2730	823	3553	1.15942	0	0.536983	1565	547	2112	0.916959	0	0.478458	1766	680	2446	0.570653	0	0.363417	0.45962	0.0720995
18S_rRNA_M_Locati	136	G	726	505	1231	4.98134	0	0.832926	593	393	986	3.12236	0.11208	0.757607	958	443	1401	1.69926	0	0.629695	0.740076	0.0838898
18S_rRNA_M_Locati	137	U	6650	598	7248	0.165163	0	0	10769	400	11169	0.763226	0	0	2350	690	3040	0.0994665	0	0.0904951	0.030165	0.0426598
18S_rRNA_M_Locati	138	U	1954	856	2810	1.10636	0	0.525336	2951	474	3425	0.01451	0	0	1204	782	1986	0.606783	0	0.377757	0.301031	0.221223
18S_rRNA_M_Locati	139	A	877	413	1290	2.67693	0	0.728187	742	339	1081	1.96474	0.138506	0.662909	789	623	1412	1.00621	0	0.501725	0.63094	0.095176
18S_rRNA_M_Locati	140	C	1077	514	1591	0.974679	0	0.493746	848	403	1251	1.26334	0	0.558372	980	499	1479	0.316471	0	0.240517	0.430878	0.137167
18S_rRNA_M_Locati	141	U	1156	507	1663	0.433861	0	0.302709	770	490	1260	0.987682	0	0.4971	995	503	1498	0.0382774	0	0	0.266603	0.20454
18S_rRNA_M_Locati	142	U	1009	729	1738	0.296186	0	0.228607	1018	665	1683	0.376128	0	0.273442	911	761	1672	0.24821	0	0	0.167349	0.119741
18S_rRNA_M_Locati	143	G	1483	490	1973	0.138022	0	0.121336	1096	518	1614	0.398844	0	0.28525	445	542	987	0.23908	0	0.193107	0.199898	0.0670896
18S_rRNA_M_Locati	144	G	1244	370	1614	0.281225	0	0.219603	1064	469	1533	0.160083	0	0.13807	332	383	715	0.517349	0.100739	0.34127	0.232981	0.0834938
18S_rRNA_M_Locati	145	A	1022	332	1354	0.515031	0.0307067	0.340113	871	396	1267	0.360875	0	0.265332	319	389	708	0.378232	0.0300372	0.274714	0.293386	0.033262
18S_rRNA_M_Locati	146	U	3210	621	3831	0.522704	0	0	3336	509	3845	0.609545	0	0	479	451	930	0.0448025	0	0	0	0
18S_rRNA_M_Locati	147	A	1204	445	1649	0.255037	0	0.203309	855	272	1127	0.623109	0	0.384108	234	265	499	0.7636	0.145811	0.43347	0.340296	0.0989381
18S_rRNA_M_Locati	148	A	1763	316	2079	0.0325214	0	0	1037	223	1260	0.418266	0	0.295079	351	229	580	0.38952	0	0.280675	0.191918	0.135834
18S_rRNA_M_Locati	149	C	1693	686	2379	0.0131933	0	0	1222	408	1630	0.121016	0	0.108011	415	209	624	0.387538	0	0.279621	0.129211	0.115135
18S_rRNA_M_Locati	150	U	2163	736	2899	0.153276	0	0	1493	796	2289	0.235007	0	0	596	361	957	0.0315936	0	0	0	0
18S_rRNA_M_Locati	151	G	698	382	1080	1.64943	0.0932136	0.622778	639	630	1269	0.464033	0	0.317126	535	162	697	0.576679	0	0.366088	0.435331	0.134044
18S_rRNA_M_Locati	152	U	1281	632	1913	0.552978	0	0.356196	891	1269	2160	0.175351	0	0	516	357	873	0.433193	0	0.302499	0.219565	0.156796
18S_rRNA_M_Locati	153	G	521	657	1178	1.66393	0.186475	0.624814	366	1124	1490	0.191974	0	0.161146	465	387	852	0.691663	0.0828334	0.409149	0.39837	0.189445
18S_rRNA_M_Locati	154	G	365	1318	1683	1.00699	0.0902755	0.501891	230	753	983	0.952349	0.161035	0.48805	149	372	521	2.20668	0.470408	0.688563	0.559501	0.0914349
18S_rRNA_M_Locati	155	C	3870	4854	8724	0.670374	0	0	1552	1829	3381	0.454166	0	0	552	2274	2826	0.391919	0	0	0	0
18S_rRNA_M_Locati	156	A	583	3544	4127	0.0780631	0	0	404	1100	1504	0.527006	0	0.345274	421	1854	2275	0.0928578	0	0	0.115091	0.162764
18S_rRNA_M_Locati	157	A	603	3460	4063	0.0297162	0	0	413	937	1350	0.797426	0.0428717	0.443832	484	2020	2504	0.126458	0	0	0.147944	0.209224
18S_rRNA_M_Locati	158	U	468	3115	3583	0.118037	0	0.105602	430	1517	1947	0.224971	0	0.183731	349	2371	2720	0.187974	0	0	0.0964443	0.075287
18S_rRNA_M_Locati	159	U	339	2634	2973	0.394564	0	0.282998	461	1639	2100	0.168512	0	0.14427	435	2382	2817	0.198632	0	0	0.142423	0.115541
18S_rRNA_M_Locati	160	C	399	3938	4337	0.0398263	0	0	567	1801	2368	0.0858918	0	0.0791287	568	1543	2111	0.127888	0	0.113435	0.0641879	0.0474994
18S_rRNA_M_Locati	161	C	1333	3833	5166	0.177404	0	0	1585	3033	4618	0.463337	0	0	1098	3220	4318	0.487381	0	0	0	0
18S_rRNA_M_Locati	162	A	2114	5533	7647	0.516376	0	0	1215	3961	5176	0.534057	0	0	972	2657	3629	0.398916	0	0	0	0
18S_rRNA_M_Locati	163	G	1217	2203	3420	0.191455	0	0.160729	617	2322	2939	0.0889418	0	0	535	1139	1674	0.355357	0	0.262302	0.141011	0.107988
18S_rRNA_M_Locati	164	A	7	78	85	47.7456	0.928595	0.979719	36	133	169	15.9676	0.805515	0.941391	9	63	72	29.7729	0.899291	0.967935	0.963015	0.0160296
18S_rRNA_M_Locati	165	G	740	2304	3044	0.232691	0	0.188817	388	2004	2392	0.076617	0	0.0711922	419	960	1379	0.40785	0	0.289846	0.183285	0.0893509
18S_rRNA_M_Locati	166	C	926	3864	4790	0.213338	0	0	471	2443	2914	0.0720602	0	0	423	1201	1624	0.165135	0	0.141805	0.0472684	0.0668477
18S_rRNA_M_Locati	167	U	1565	4205	5770	0.385523	0	0	724	2412	3136	0.162852	0	0	844	2018	2862	0.4258	0	0	0	0
18S_rRNA_M_Locati	168	A	1037	3115	4152	0.134224	0	0	745	2096	2841	0.108683	0	0	596	1238	1834	0.156391	0	0	0	0
18S_rRNA_M_Locati	169	A	920	1999	2919	0.160449	0	0.138305	471	1539	2010	0.199276	0	0.166233	396	898	1294	0.0978979	0	0.0892313	0.131256	0.0318284
18S_rRNA_M_Locati	170	U	24	66	90	38.8435	0.884637	0.975171	19	82	101	24.0397	0.808899	0.960439	13	179	192	6.60892	0.409844	0.869167	0.934926	0.0468856
18S_rRNA_M_Locati	171	A	763	2008	2771	0.312995	0	0.238448	491	1595	2086	0.217638	0	0.178808	418	800	1218	0.144499	0	0.126346	0.181201	0.0457967
18S_rRNA_M_Locati	172	C	5528	2204	7732	0.609092	0	0	4303	2175	6478	0.694104	0	0	2460	837	3297	0.67042	0	0	0	0
18S_rRNA_M_Locati	173	A	1027	1600	2627	0.291684	0	0.225883	467	1282	1749	0.359695	0	0.264652	352	393	745	0.693238	0	0.40974	0.300092	0.079132
18S_rRNA_M_Locati	174	U	1441	1948	3389	0.0757391	0	0	777	1810	2587	0.160544	0	0	334	528	862	0.27452	0	0.215587	0.0718624	0.101629
18S_rRNA_M_Locati	175	G	627	927	1554	1.0502	0	0.512404	312	727	1039	1.12083	0	0.528727	201	335	536	0.92187	0	0.480139	0.50709	0.0201888
18S_rRNA_M_Locati	176	C	930	1056	1986	0.532327	0	0.347512	511	674	1185	0.788477	0	0.441073	230	304	534	0.817134	0	0.450146	0.41291	0.0463917
18S_rRNA_M_Locati	177	C	4567	1807	6374	0.601387	0	0	2882	1077	3959	0.553858	0	0	826	581	1407	0.385393	0	0	0	0
18S_rRNA_M_Locati	178	A	1058	1165	2223	0.285971	0	0.222455	582	623	1205	0.640492	0	0.390624	417	317	734	0.230809	0	0.187734	0.266938	0.0886008
18S_rRNA_M_Locati	179	A	282	1023	1305	0.920759	0	0.479564	153	499	652	1.56743	0.116514	0.61087	183	174	357	1.17328	0.134097	0.54056	0.543665	0.0536506
18S_rRNA_M_Locati	180	C	1754	1681	3435	0.388769	0	0	1211	971	2182	0.349397	0	0	499	512	1011	0.319906	0	0	0	0
18S_rRNA_M_Locati	181	G	650	982	1632	0.33994	0	0.253814	414	576	990	0.518533	0	0.341697	223	278	501	0.568814	0	0.363037	0.319516	0.047268
18S_rRNA_M_Locati	182	A	591	940	1531	0.380186	0	0.27559	544	1039	1583	0.0960438	0	0	159	514	673	0.2182	0	0.179335	0.151642	0.114201
18S_rRNA_M_Locati	183	G	363	1028	1391	0.435784	0	0.303668	263	472	735	1.03945	0.0157033	0.510011	102	590	692	0.205756	0	0.170849	0.328176	0.139542
18S_rRNA_M_Locati	184	C	468	1339	1807	0.0676315	0	0	355	1413	1768	0.293348	0	0	89	1038	1127	0.29537	0	0	0	0
18S_rRNA_M_Locati	185	G	135	661	796	1.26522	0.187682	0.558851	127	463	590	1.39722	0.228631	0.583261	29	251	280	2.39201	0.36798	0.70593	0.616014	0.0643567
18S_rRNA_M_Locati	186	C	602	609	1211	0.556711	0	0.35781	389	669	1058	0.360476	0	0.265147	237	360	597	0.637811	0.0485644	0.389827	0.337595	0.0528693
18S_rRNA_M_Locati	187	C	1154	1553	2707	0.372194	0	0	732	1455	2187	0.407186	0	0	442	1227	1669	0.460313	0	0	0	0
18S_rRNA_M_Locati	188	G	703	805	1508	0.269192	0	0.212208	416	1064	1480	0.0326281	0	0	247	1172	1419	0.310391	0	0	0.070736	0.100036
18S_rRNA_M_Locati	189	A	473	536	1009	0.989318	0.130282	0.497563	339	776	1115	0.307228	0	0.235184	231	386	617	0.733315	0	0.423466	0.385404	0.110445
18S_rRNA_M_Locati	190	C	884	1269	2153	0.0943825	0	0	698	846	1544	0.0373535	0	0	419	863	1282	0.233541	0	0	0	0
18S_rRNA_M_Locati	191	C	895	1601	2496	0.19163	0	0	849	752	1601	0.0404286	0	0	446	974	1420	0.34776	0	0	0	0
18S_rRNA_M_Locati	192	U	771	2813	3584	0.4536	0	0	813	1073	1886	0.193753	0	0	178	805	983	0.0281843	0	0	0	0
18S_rRNA_M_Locati	193	G	472	1877	2349	0.102189	0	0	715	747	1462	0.0633022	0	0.0595719	215	1044	1259	0.305397	0	0	0.0198573	0.0280825
18S_rRNA_M_Locati	194	G	371	1764	2135	0.0415314	0	0	577	1065	1642	0.117103	0	0	279	687	966	0.178651	0	0	0	0
18S_rRNA_M_Locati	195	G	103	1161	1264	0.661019	0.0369098	0.398149	215	750	965	0.533207	0	0.348007	148	267	415	0.824119	0.17063	0.452386	0.399514	0.0426235
18S_rRNA_M_Locati	196	C	310	1556	1866	0.075189	0	0.0699658	399	1611	2010	0.34398	0	0	195	256	451	0.546165	0.0849089	0.353745	0.141237	0.152956
18S_rRNA_M_Locati	197	C	331	2589	2920	0.388033	0	0	372	2102	2474	0.521118	0	0	89	398	487	0.254212	0	0.203018	0.0676728	0.0957038
18S_rRNA_M_Locati	198	G	196	1313	1509	0.200949	0	0.167418	109	532	641	0.988197	0.177262	0.497421	31	306	337	0.611111	0.0724543	0.380008	0.348282	0.136578
18S_rRNA_M_Locati	199	C	287	1208	1495	0.0793078	0	0.0735258	263	602	865	0.289723	0	0.224841	99	341	440	0.0847821	0	0.0783196	0.125562	0.070228
18S_rRNA_M_Locati	200	C	390	1102	1492	0.0091836	0	0	282	509	791	0.277413	0	0.217383	123	221	344	0.230886	0	0.18802	0.135134	0.0963032
18S_rRNA_M_Locati	201	C	162	1036	1198	0.143703	0	0.125739	203	637	840	0.047285	0	0.0452014	54	326	380	0.0175561	0	0	0.0569801	0.052004
18S_rRNA_M_Locati	202	U	72	1273	1345	0.0708602	0	0	80	717	797	0.00665553	0	0	22	372	394	0.0922925	0	0	0	0
18S_rRNA_M_Locati	203	U	41	1221	1262	0.10827	0	0	84	700	784	0.154763	0	0	18	403	421	0.194049	0	0	0	0
18S_rRNA_M_Locati	204	C	62	959	1021	0.0222331	0	0	79	275	354	0.701158	0.120144	0.412849	49	275	324	0.0566496	0	0.053769	0.155539	0.183265
18S_rRNA_M_Locati	205	U	73	748	821	0.163909	0	0.140974	63	397	460	0.217619	0	0.179044	28	313	341	0.0119558	0	0.0118488	0.110622	0.0715517
18S_rRNA_M_Locati	206	C	99	617	716	0.255075	0	0.203461	75	245	320	0.693977	0.04785	0.410428	41	218	259	0.385684	0.058325	0.279109	0.297666	0.0855067
18S_rRNA_M_Locati	207	C	84	297	381	1.34834	0.288669	0.574808	46	185	231	1.31892	0.194157	0.569824	45	165	210	0.783886	0.189524	0.440597	0.52841	0.0621264
18S_rRNA_M_Locati	208	C	37	365	402	1.18696	0.24487	0.543361	11	209	220	1.45561	0.23809	0.593863	25	235	260	0.457173	0.092747	0.314567	0.48393	0.12152
18S_rRNA_M_Locati	209	C	49	467	516	0.642854	0.122342	0.391764	3	461	464	0.122891	0	0.109652	26	266	292	0.301441	0.0216478	0.23223	0.244549	0.115501
18S_rRNA_M_Locati	210	U	54	939	993	0.191326	0	0	13	976	989	0.517621	0	0	23	436	459	0.202995	0	0	0	0
18S_rRNA_M_Locati	211	C	26	1074	1100	0.252155	0	0	22	435	457	0.258734	0	0.205908	11	508	519	0.280962	0	0	0.068636	0.0970659
18S_rRNA_M_Locati	212	G	16	831	847	0.0686321	0	0.0642952	18	492	510	0.200435	0	0.167241	15	541	556	0.293497	0	0	0.0771788	0.068881
18S_rRNA_M_Locati	213	G	74	1055	1129	0.176047	0	0	81	547	628	0.0529588	0	0.0503713	52	439	491	0.102665	0	0	0.0167904	0.0237453
18S_rRNA_M_Locati	214	G	130	943	1073	0.0633147	0	0	188	648	836	0.143807	0	0	140	295	435	0.119062	0	0.106613	0.0355377	0.0502579
18S_rRNA_M_Locati	215	G	210	599	809	0.360274	0.0737992	0.265095	173	488	661	0.193907	0	0.16262	157	138	295	0.815541	0.154532	0.450037	0.292584	0.118937
18S_rRNA_M_Locati	216	C	158	915	1073	0.0312746	0	0.0303535	117	613	730	0.110838	0	0.0999014	112	198	310	0.886424	0.209462	0.470699	0.200318	0.193285
18S_rRNA_M_Locati	217	G	289	879	1168	0.0229921	0	0	293	444	737	0.116155	0	0.104193	176	254	430	0.45803	0.100039	0.314644	0.139612	0.130872
18S_rRNA_M_Locati	218	G	544	813	1357	0.142653	0	0	475	482	957	0.134563	0	0	511	161	672	0.0493974	0	0	0	0
18S_rRNA_M_Locati	219	G	642	668	1310	0.0590135	0	0	510	614	1124	0.271694	0	0	673	239	912	0.303359	0	0	0	0
18S_rRNA_M_Locati	220	G	899	347	1246	0.011316	0	0	629	682	1311	0.399864	0	0	567	260	827	0.205314	0	0	0	0
18S_rRNA_M_Locati	221	G	1134	151	1285	0.256359	0	0.204176	334	501	835	0.420561	0	0.296302	470	234	704	0.0227581	0	0	0.166826	0.123814
18S_rRNA_M_Locati	222	G	786	117	903	0.917982	0	0.478895	401	282	683	0.816277	0.0604906	0.449785	915	77	992	0.344131	0	0	0.30956	0.219214
18S_rRNA_M_Locati	223	U	1446	130	1576	0.0975904	0	0.0889647	597	253	850	0.478431	0	0.323864	1030	58	1088	0.432435	0	0	0.13761	0.136618
18S_rRNA_M_Locati	224	G	1416	183	1599	0.126708	0	0.112521	444	262	706	0.865441	0.0766627	0.464286	657	63	720	0.141655	0	0	0.192269	0.197754
18S_rRNA_M_Locati	225	G	1442	288	1730	0.0929521	0	0.0850918	208	302	510	1.7411	0.171647	0.635636	378	117	495	0.177711	0	0.151154	0.290627	0.245444
18S_rRNA_M_Locati	226	G	659	6	665	2.15577	0	0.683446	349	145	494	1.90754	0.126759	0.656523	303	42	345	0.541875	0.0365095	0.352099	0.564023	0.150255
18S_rRNA_M_Locati	227	U	7329	561	7890	0.826943	0	0	6839	442	7281	0.90975	0	0	463	79	542	0.13231	0	0	0	0
18S_rRNA_M_Locati	228	A	624	87	711	2.16114	0	0.683963	294	52	346	3.14547	0.306539	0.759301	117	68	185	1.64074	0.212948	0.622586	0.688616	0.0559105
18S_rRNA_M_Locati	229	C	952	168	1120	0.946843	0	0.486571	401	73	474	1.8437	0.187965	0.648825	119	37	156	1.80743	0.168815	0.645266	0.593554	0.0756626
18S_rRNA_M_Locati	230	C	1203	101	1304	0.599395	0	0.374943	584	119	703	0.760985	0	0.432485	107	78	185	1.08369	0.00918463	0.521428	0.442952	0.0602583
18S_rRNA_M_Locati	231	C	1844	306	2150	0.106824	0	0	870	269	1139	0.00897661	0	0	176	43	219	0.679091	0	0.405537	0.135179	0.191172
18S_rRNA_M_Locati	232	G	1501	143	1644	0.144816	0	0.126564	558	116	674	0.64558	0	0.392665	284	25	309	0.172151	0	0.147273	0.222167	0.120856
18S_rRNA_M_Locati	233	G	2424	54	2478	0.29	0	0	768	90	858	0.215884	0	0.177723	664	24	688	0.459748	0	0	0.0592411	0.0837796
18S_rRNA_M_Locati	234	G	2397	18	2415	0.432078	0	0	829	78	907	0.267731	0	0	741	26	767	0.477763	0	0	0	0
18S_rRNA_M_Locati	235	G	1179	6	1185	0.298248	0	0.22988	418	54	472	0.607423	0.0278435	0.378384	199	32	231	1.45517	0	0.593739	0.400668	0.149378
18S_rRNA_M_Locati	236	A	737	38	775	1.00651	0.186471	0.501946	290	77	367	1.10791	0.181839	0.526275	148	55	203	2.20741	0.218131	0.689275	0.572499	0.0831687
18S_rRNA_M_Locati	237	C	955	72	1027	0.525519	0.010244	0.344705	651	113	764	0.00087146	0	0	271	95	366	1.09712	0.0887021	0.523837	0.289514	0.217387
18S_rRNA_M_Locati	238	G	735	61	796	0.929012	0.112633	0.481913	350	74	424	0.837307	0.0811501	0.45631	318	80	398	1.17057	0.184378	0.539914	0.492712	0.0349751
18S_rRNA_M_Locati	239	C	1404	108	1512	0.0580745	0	0	831	239	1070	0.335668	0	0	883	244	1127	0.244316	0	0	0	0
18S_rRNA_M_Locati	240	G	892	215	1107	0.280225	0	0.219041	398	197	595	0.30151	0	0.231961	665	300	965	0.0352427	0	0	0.150334	0.106433
18S_rRNA_M_Locati	241	U	1428	536	1964	0.350031	0	0	764	555	1319	0.46819	0	0	1132	714	1846	0.530452	0	0	0	0
18S_rRNA_M_Locati	242	G	837	492	1329	0.0164996	0	0.0162438	389	174	563	0.420252	0	0.29627	461	657	1118	0.106931	0	0	0.104171	0.135996
18S_rRNA_M_Locati	243	C	1954	688	2642	0.537773	0	0	991	317	1308	0.437085	0	0	1125	814	1939	0.522446	0	0	0	0
18S_rRNA_M_Locati	244	A	778	344	1122	0.354457	0	0.261869	349	92	441	1.1679	0	0.539287	740	319	1059	0.0536688	0	0.0509808	0.284045	0.199966
18S_rRNA_M_Locati	245	U	600	398	998	0.680925	0	0.405331	351	195	546	0.945826	0	0.486536	454	133	587	1.05967	0.11179	0.514912	0.468926	0.0464368
18S_rRNA_M_Locati	246	U	774	403	1177	0.523231	0	0.343692	526	289	815	0.38524	0	0.27835	586	293	879	0.373068	0	0.271929	0.29799	0.0324224
18S_rRNA_M_Locati	247	U	794	397	1191	0.626594	0.0108612	0.385417	539	374	913	0.340481	0	0.254207	541	172	713	0.750047	0.0372337	0.42893	0.356185	0.0742651
18S_rRNA_M_Locati	248	A	498	380	878	1.75269	0.170906	0.636982	258	324	582	1.91075	0	0.656833	404	325	729	0.751842	0.0661983	0.429508	0.574441	0.102803
18S_rRNA_M_Locati	249	U	760	504	1264	1.21332	0.145877	0.548387	506	371	877	1.19096	0	0.543863	596	84	680	1.07365	0.185937	0.518125	0.536792	0.0133276
18S_rRNA_M_Locati	250	C	2589	1027	3616	0.15394	0	0	2517	545	3062	0.307085	0	0	1933	474	2407	0.425268	0	0	0	0
18S_rRNA_M_Locati	251	A	2259	1222	3481	0.0186962	0	0	1544	722	2266	0.0849679	0	0.0783456	1173	294	1467	0.0860884	0	0.0793144	0.0525533	0.0371629
18S_rRNA_M_Locati	252	G	2255	1234	3489	0.0606558	0	0.0572026	1377	724	2101	0.270938	0	0.213259	1440	407	1847	0.100794	0	0	0.0901539	0.0901266
18S_rRNA_M_Locati	253	A	1563	1239	2802	0.431256	0	0.301388	853	703	1556	0.850503	0	0.459766	844	415	1259	0.416755	0	0.294326	0.351827	0.0763789
18S_rRNA_M_Locati	254	U	2684	5830	8514	0.591413	0	0	1342	6569	7911	0.720117	0	0	1358	632	1990	0.129449	0	0	0	0
18S_rRNA_M_Locati	255	C	2612	3379	5991	0.360673	0	0	1183	1476	2659	0.0639307	0	0.0601104	2191	470	2661	0.369522	0	0	0.0200368	0.0283363
18S_rRNA_M_Locati	256	C	6289	1961	8250	0.580253	0	0	6155	461	6616	0.658808	0	0	3424	410	3834	0.602663	0	0	0	0
18S_rRNA_M_Locati	257	A	1413	1152	2565	0.531268	0	0.347035	1209	288	1497	0.791055	0	0.441834	1179	187	1366	0.278664	0	0.218058	0.335642	0.0917107
18S_rRNA_M_Locati	258	A	978	1163	2141	0.705722	0	0.413851	999	233	1232	1.01665	0	0.504332	1169	250	1419	0.1668	0	0.143041	0.353741	0.153498
18S_rRNA_M_Locati	259	A	905	1074	1979	0.728339	0	0.421533	797	260	1057	1.23843	0	0.553491	643	226	869	0.862759	0.0224065	0.463448	0.479491	0.0550532
18S_rRNA_M_Locati	260	A	564	823	1387	1.32333	0.0916411	0.569761	575	211	786	1.85464	0	0.649982	455	183	638	1.48439	0.177335	0.597863	0.605869	0.0332359
18S_rRNA_M_Locati	261	C	758	1071	1829	0.492222	0	0.329979	590	304	894	1.07019	0	0.517232	743	246	989	0.499293	0	0.333243	0.393485	0.0875127
18S_rRNA_M_Locati	262	C	527	1040	1567	0.59139	0	0.371768	444	330	774	1.32313	0	0.569862	657	325	982	0.442738	0	0.30709	0.41624	0.11179
18S_rRNA_M_Locati	263	C	2322	1385	3707	0.47802	0	0	2303	527	2830	0.535625	0	0	1962	409	2371	0.508169	0	0	0	0
18S_rRNA_M_Locati	264	A	647	741	1388	0.565899	0.0440406	0.361555	852	248	1100	0.391291	0	0.281427	769	313	1082	0.250693	0	0.200591	0.281191	0.0657136
18S_rRNA_M_Locati	265	U	1153	1493	2646	0.230769	0	0	1983	410	2393	0.418611	0	0	614	490	1104	0.227109	0	0.185213	0.0617377	0.0873103
18S_rRNA_M_Locati	266	G	705	626	1331	0.616258	0.0340603	0.381464	958	251	1209	0.258852	0	0.205761	692	458	1150	0.172874	0	0.147503	0.244909	0.0994449
18S_rRNA_M_Locati	267	C	1060	1503	2563	0.202695	0	0	1272	718	1990	0.228556	0	0	772	754	1526	0.114851	0	0	0	0
18S_rRNA_M_Locati	268	G	1079	1087	2166	0.0491104	0	0	965	844	1809	0.143929	0	0	1114	522	1636	0.18504	0	0	0	0
18S_rRNA_M_Locati	269	G	1048	1367	2415	0.148924	0	0	860	517	1377	0.209321	0	0.173194	1154	686	1840	0.283536	0	0	0.0577312	0.0816443
18S_rRNA_M_Locati	270	G	742	1053	1795	0.159094	0	0.137323	590	549	1139	0.444571	0	0.30794	866	832	1698	0.239605	0	0	0.148421	0.125961
18S_rRNA_M_Locati	271	U	158	2039	2197	0.0173188	0	0	26	1036	1062	0.617644	0.0500142	0.382039	10	1079	1089	0.278298	0	0.217866	0.199968	0.156479
18S_rRNA_M_Locati	272	G	277	921	1198	0.90619	0.191029	0.475602	154	701	855	0.999611	0.160802	0.500195	96	412	508	1.90891	0.404777	0.656672	0.544156	0.0801916
18S_rRNA_M_Locati	273	C	993	1177	2170	0.0887558	0	0.0815549	994	1933	2927	0.461308	0	0	602	769	1371	0.0687237	0	0.0643483	0.0486344	0.0350998
18S_rRNA_M_Locati	274	G	563	938	1501	0.72456	0.165361	0.420304	369	596	965	0.949701	0.136507	0.48736	444	486	930	0.705227	0.137205	0.413829	0.440497	0.0332418
18S_rRNA_M_Locati	275	C	982	1559	2541	0.00875951	0	0.00868683	663	1867	2530	0.312165	0	0	509	937	1446	0.0829532	0	0.076648	0.0284449	0.0342687
18S_rRNA_M_Locati	276	G	925	2099	3024	0.123747	0	0	781	1252	2033	0.0601551	0	0	651	1179	1830	0.126519	0	0	0	0
18S_rRNA_M_Locati	277	G	1037	2700	3737	0.274021	0	0	736	1413	2149	0.0774522	0	0	735	1189	1924	0.122545	0	0	0	0
18S_rRNA_M_Locati	278	G	662	1706	2368	0.244599	0	0.196595	458	763	1221	0.754346	0.0876881	0.430188	756	827	1583	0.154559	0	0.133942	0.253575	0.127477
18S_rRNA_M_Locati	279	C	1029	3246	4275	0.325572	0	0	901	1729	2630	0.204624	0	0	998	1635	2633	0.297385	0	0	0	0
18S_rRNA_M_Locati	280	G	1053	3016	4069	0.279672	0	0	982	1730	2712	0.24297	0	0	635	1663	2298	0.148519	0	0	0	0
18S_rRNA_M_Locati	281	G	688	1550	2238	0.41393	0.049266	0.292844	528	1169	1697	0.342789	0.0251798	0.255393	480	1066	1546	0.370035	0.0630023	0.270219	0.272819	0.0153992
18S_rRNA_M_Locati	282	U	1089	2282	3371	0.111701	0	0	721	2043	2764	0.216283	0	0	257	2055	2312	0.097161	0	0	0	0
18S_rRNA_M_Locati	283	G	1364	1649	3013	0.017404	0	0	622	1505	2127	0.0405754	0	0.0390108	486	2010	2496	0.183981	0	0	0.0130036	0.0183899
18S_rRNA_M_Locati	284	G	1002	1376	2378	0.225632	0	0.184157	425	1143	1568	0.417669	0	0.294749	317	1565	1882	0.0814126	0	0.0753206	0.184742	0.0895823
18S_rRNA_M_Locati	285	A	991	2439	3430	0.207225	0	0	585	2114	2699	0.23949	0	0	143	2252	2395	0.20704	0	0	0	0
18S_rRNA_M_Locati	286	G	808	1560	2368	0.122616	0	0.109265	453	1548	2001	0.00299145	0	0.00298402	111	1930	2041	0.114795	0	0	0.0374162	0.0508191
18S_rRNA_M_Locati	287	A	365	1964	2329	0.0557415	0	0.0528199	294	2594	2888	0.399046	0	0	42	1956	1998	0.164143	0	0	0.0176066	0.0248996
18S_rRNA_M_Locati	288	G	540	1990	2530	0.077308	0	0	242	2279	2521	0.343643	0	0	38	2270	2308	0.338425	0	0	0	0
18S_rRNA_M_Locati	289	G	874	1556	2430	0.102875	0	0	327	1031	1358	0.180803	0	0.153214	141	1017	1158	0.299252	0.0755768	0.23048	0.127898	0.0957806
18S_rRNA_M_Locati	290	G	1071	1219	2290	0.0817401	0	0	324	798	1122	0.333205	0	0.250095	267	500	767	0.842405	0.198991	0.457554	0.235883	0.187066
18S_rRNA_M_Locati	291	G	1071	881	1952	0.0991921	0	0.090283	321	493	814	0.768671	0.12056	0.434905	342	415	757	0.814439	0.105999	0.449192	0.324793	0.165926
18S_rRNA_M_Locati	292	G	1191	578	1769	0.141438	0	0.123973	291	559	850	0.484332	0	0.326555	552	420	972	0.288683	0	0.224193	0.224907	0.0827052
18S_rRNA_M_Locati	293	G	713	377	1090	1.00247	0.182488	0.500847	161	270	431	1.85965	0.281847	0.650833	390	295	685	0.886638	0.0852366	0.47032	0.540667	0.07889
18S_rRNA_M_Locati	294	C	903	501	1404	0.49898	0	0.333038	237	588	825	0.267958	0	0.211532	570	374	944	0.298836	0	0.230267	0.258279	0.0534128
18S_rRNA_M_Locati	295	C	1007	387	1394	0.51863	0	0.341673	195	780	975	0.0400842	0	0	582	376	958	0.261928	0	0.207733	0.183135	0.140568
18S_rRNA_M_Locati	296	U	1673	756	2429	0.172309	0	0	280	996	1276	0.321074	0	0	822	518	1340	0.0965283	0	0	0	0
18S_rRNA_M_Locati	297	C	2494	982	3476	0.438731	0	0	656	715	1371	0.386038	0	0	1119	1030	2149	0.446357	0	0	0	0
18S_rRNA_M_Locati	298	G	880	340	1220	0.799199	0	0.444399	207	357	564	0.609695	0	0.379181	595	483	1078	0.244187	0	0.196409	0.339996	0.104965
18S_rRNA_M_Locati	299	C	3187	1103	4290	0.576325	0	0	677	724	1401	0.445649	0	0	1265	1032	2297	0.474978	0	0	0	0
18S_rRNA_M_Locati	300	G	822	352	1174	0.848322	0.00607656	0.45918	132	375	507	0.709143	0.103516	0.41539	582	359	941	0.467197	0.00382994	0.318659	0.397743	0.0587089
18S_rRNA_M_Locati	301	C	1625	497	2122	0.0488041	0	0	266	458	724	0.138391	0	0.121715	868	465	1333	0.0174496	0	0	0.0405715	0.0573768
18S_rRNA_M_Locati	302	C	1211	604	1815	0.080372	0	0.0744308	210	387	597	0.326774	0	0.246603	746	466	1212	0.044078	0	0.0422506	0.121095	0.0897149
18S_rRNA_M_Locati	303	U	1810	896	2706	0.367816	0	0	391	498	889	0.187728	0	0	983	511	1494	0.228056	0	0	0	0
18S_rRNA_M_Locati	304	A	620	431	1051	0.607784	0	0.37825	163	293	456	0.637248	0.0475399	0.38974	497	381	878	0.239805	0	0.193599	0.32053	0.0898757
18S_rRNA_M_Locati	305	C	796	479	1275	0.226602	0	0.184858	270	214	484	0.55047	0.0347789	0.355507	714	292	1006	0.019221	0	0	0.180122	0.145174
18S_rRNA_M_Locati	306	C	771	646	1417	0.0762185	0	0	359	295	654	0.105802	0	0.0958109	910	333	1243	0.338076	0	0	0.031937	0.0451657
18S_rRNA_M_Locati	307	C	691	775	1466	0.135083	0	0	408	580	988	0.257308	0	0	565	276	841	0.0491423	0	0	0	0
18S_rRNA_M_Locati	308	G	268	413	681	0.852493	0.141847	0.460551	253	223	476	0.688656	0.114936	0.40832	271	117	388	0.924536	0.195464	0.481037	0.449969	0.030615
18S_rRNA_M_Locati	309	C	418	560	978	0.189933	0	0.159754	436	457	893	0.125926	0	0	259	310	569	0.116179	0	0.10425	0.0880014	0.0662235
18S_rRNA_M_Locati	310	C	213	555	768	0.440673	0.0604988	0.306156	314	706	1020	0.237969	0	0	137	186	323	0.796708	0.105852	0.44419	0.250115	0.185619
18S_rRNA_M_Locati	311	G	377	378	755	0.508466	0.0899825	0.337371	301	404	705	0.192619	0	0.161701	197	81	278	0.998128	0.106243	0.500429	0.333167	0.138317
18S_rRNA_M_Locati	312	C	359	465	824	0.353401	0	0.261355	443	618	1061	0.247029	0	0	286	221	507	0.0442038	0	0	0.0871182	0.123204
18S_rRNA_M_Locati	313	C	393	1132	1525	0.336836	0	0	526	632	1158	0.339277	0	0	266	232	498	0.120975	0	0	0	0
18S_rRNA_M_Locati	314	G	181	956	1137	0.0927651	0	0	191	435	626	0.247156	0	0.198429	100	123	223	1.01176	0.183139	0.50404	0.234157	0.207319
18S_rRNA_M_Locati	315	U	137	1081	1218	0.15087	0	0	256	522	778	0.0603052	0	0	114	163	277	0.588729	0.0292317	0.371407	0.123802	0.175083
18S_rRNA_M_Locati	316	C	173	1172	1345	0.238592	0	0	307	521	828	0.163128	0	0	124	419	543	0.226675	0	0	0	0
18S_rRNA_M_Locati	317	C	69	1495	1564	0.347867	0	0	128	658	786	0.131046	0	0	49	695	744	0.431648	0	0	0	0
18S_rRNA_M_Locati	318	G	87	601	688	0.673649	0.118866	0.402853	80	325	405	0.793623	0.117113	0.443078	68	317	385	0.281491	0	0.220104	0.355345	0.0970295
18S_rRNA_M_Locati	319	C	102	574	676	0.801576	0.140764	0.445295	39	331	370	0.888709	0.114703	0.47121	66	360	426	0.194379	0	0.163065	0.359857	0.139555
18S_rRNA_M_Locati	320	C	164	597	761	1.80645	0.287998	0.643978	112	301	413	0.909179	0	0.476818	81	364	445	1.0283	0.0816397	0.507538	0.542778	0.0726502
18S_rRNA_M_Locati	321	C	162	692	854	1.96646	0.0376167	0.663159	56	232	288	2.0426	0.251602	0.672098	81	180	261	3.10106	0.244518	0.756865	0.697374	0.0422245
18S_rRNA_M_Locati	322	C	489	652	1141	2.23015	0	0.690604	408	358	766	0.296335	0	0.228825	264	373	637	1.10834	0	0.526085	0.481838	0.191099
18S_rRNA_M_Locati	323	C	657	740	1397	4.39358	0.182393	0.814702	622	553	1175	0.764881	0	0.433598	158	542	700	1.80799	0	0.6442	0.630834	0.155872
18S_rRNA_M_Locati	324	G	492	1141	1633	4.3133	0.0883539	0.811887	453	576	1029	1.33804	0.0317807	0.572528	74	684	758	1.89949	0	0.655409	0.679941	0.0992453
18S_rRNA_M_Locati	325	G	346	1852	2198	3.50484	0	0.778095	288	309	597	4.76475	0	0.826772	72	690	762	2.2472	0	0.692321	0.765729	0.0555812
18S_rRNA_M_Locati	326	C	3016	14964	17980	0.486649	0	0	924	1848	2772	0.364631	0	0.267272	576	6874	7450	0.742208	0	0	0.0890906	0.125993
18S_rRNA_M_Locati	327	C	4061	651	4712	1.45823	0	0.593255	1092	250	1342	2.23479	0	0.69102	849	477	1326	1.05654	0	0.513934	0.599403	0.0724258
18S_rRNA_M_Locati	328	U	17466	494	17960	0.409907	0	0	2744	237	2981	0.510955	0	0.338242	3755	455	4210	0.425399	0	0	0.112747	0.159449
18S_rRNA_M_Locati	329	C	62708	486	63194	0.915666	0	0	19553	263	19816	0.860519	0	0	8890	549	9439	0.816627	0	0	0	0
18S_rRNA_M_Locati	330	G	2106	96	2202	4.30866	0	0.811698	1323	106	1429	2.42701	0.104618	0.708345	695	140	835	2.03892	0	0.671199	0.730414	0.0594432
18S_rRNA_M_Locati	331	C	3461	149	3610	1.88065	0	0.652919	13017	163	13180	0.743619	0	0	1050	169	1219	0.837878	0	0.456098	0.369672	0.273469
18S_rRNA_M_Locati	332	U	2725	176	2901	2.19714	0	0.687294	3519	248	3767	0.109106	0	0.0983964	687	247	934	1.14636	0	0.534361	0.440017	0.2495
18S_rRNA_M_Locati	333	U	54	34	88	85.139	0.947172	0.98852	161	12	173	22.5534	0.251211	0.957777	28	13	41	35.6437	0.55202	0.973343	0.973213	0.012551
18S_rRNA_M_Locati	334	U	22	33	55	115.643	0.972968	0.991579	50	15	65	54.9926	0.787889	0.982406	11	17	28	45.5069	0.858455	0.979224	0.984403	0.0052377
18S_rRNA_M_Locati	335	G	348	228	576	7.32786	0.822867	0.880104	459	289	748	3.2159	0.157565	0.763045	132	156	288	2.58781	0.454841	0.721975	0.788375	0.0669947
18S_rRNA_M_Locati	336	G	1306	137	1443	0.152839	0	0	812	204	1016	0.917983	0.0832648	0.478864	358	104	462	0.165851	0	0.142521	0.207129	0.200763
18S_rRNA_M_Locati	337	U	1139	233	1372	0.158825	0	0	1098	398	1496	0.165568	0	0.142131	205	238	443	0.255531	0	0.20389	0.11534	0.0853661
18S_rRNA_M_Locati	338	G	932	120	1052	0.0433471	0	0.041584	936	199	1135	0.0418623	0	0.0402142	273	82	355	0.659332	0	0.398022	0.15994	0.16835
18S_rRNA_M_Locati	339	A	696	83	779	0.377835	0	0.274479	787	200	987	0.130364	0	0.115433	253	81	334	0.855058	0.126393	0.461676	0.283863	0.141509
18S_rRNA_M_Locati	340	C	997	160	1157	0.0326521	0	0	801	233	1034	0.188696	0	0.158871	673	152	825	0.236347	0	0	0.052957	0.0748925
18S_rRNA_M_Locati	341	U	1001	156	1157	0.180723	0	0.153174	1024	182	1206	0.240983	0	0.194317	1004	123	1127	0.387057	0	0	0.11583	0.0836089
18S_rRNA_M_Locati	342	C	979	143	1122	0.300119	0	0.230998	993	182	1175	0.370021	0	0.270252	761	73	834	0.0793214	0	0	0.167083	0.119228
18S_rRNA_M_Locati	343	U	1138	84	1222	0.226837	0	0.185019	1070	95	1165	0.450924	0	0.310968	868	54	922	0.158758	0	0	0.165329	0.127713
18S_rRNA_M_Locati	344	A	1499	383	1882	0.154617	0	0	1519	876	2395	0.315628	0	0	1088	96	1184	0.345326	0	0	0	0
18S_rRNA_M_Locati	345	G	1076	247	1323	0.538503	0	0.350189	854	720	1574	0.171266	0	0.146303	653	66	719	0.223827	0	0.183099	0.22653	0.0887212
18S_rRNA_M_Locati	346	A	842	379	1221	1.15632	0.0407363	0.53645	739	960	1699	0.173026	0	0.147578	470	79	549	0.686364	0.119471	0.407447	0.363825	0.161725
18S_rRNA_M_Locati	347	U	3309	884	4193	0.220354	0	0	2909	1791	4700	0.593361	0	0	945	313	1258	0.302206	0	0	0	0
18S_rRNA_M_Locati	348	A	587	781	1368	2.28327	0.186358	0.695581	491	1061	1552	0.618566	0	0.382321	234	418	652	0.469423	0.0334573	0.319794	0.465899	0.164403
18S_rRNA_M_Locati	349	A	464	1012	1476	2.66443	0.377599	0.727241	335	900	1235	1.24907	0.140648	0.555572	221	300	521	0.941294	0.203559	0.485359	0.589391	0.101602
18S_rRNA_M_Locati	350	C	973	2502	3475	0.681834	0.000655735	0.40548	872	1103	1975	0.440435	0	0.305873	376	534	910	0.0926576	0	0.0848855	0.265413	0.133973
18S_rRNA_M_Locati	351	C	755	5932	6687	0.0798395	0	0	656	1408	2064	0.423998	0	0.297853	251	1101	1352	0.272021	0	0	0.0992843	0.140409
18S_rRNA_M_Locati	352	U	909	8299	9208	0.274969	0	0	1003	2013	3016	0.0212205	0	0.0207863	259	609	868	0.320892	0	0.243148	0.0879781	0.110049
18S_rRNA_M_Locati	353	C	992	14434	15426	0.578511	0	0	1219	3866	5085	0.413949	0	0	143	1315	1458	0.198972	0	0	0	0
18S_rRNA_M_Locati	354	G	1154	10502	11656	0.389796	0	0	587	4086	4673	0.363959	0	0	245	948	1193	0.0339661	0	0.032877	0.010959	0.0154983
18S_rRNA_M_Locati	355	G	514	10018	10532	0.295124	0	0	406	3871	4277	0.27904	0	0	108	1203	1311	0.0145579	0	0	0	0
18S_rRNA_M_Locati	356	G	298	4024	4322	0.911414	0.117545	0.476885	198	2204	2402	0.413992	0	0.292868	143	870	1013	0.406629	0.0623572	0.289284	0.353012	0.0876034
18S_rRNA_M_Locati	357	C	484	5053	5537	0.420667	0	0.296143	551	1980	2531	0.31388	0	0.238967	218	1233	1451	0.0328206	0	0	0.17837	0.128268
18S_rRNA_M_Locati	358	C	674	7953	8627	0.170679	0	0	699	3746	4445	0.303104	0	0	218	1958	2176	0.378691	0	0	0	0
18S_rRNA_M_Locati	359	G	481	5340	5821	0.171539	0	0.146443	375	2295	2670	0.187404	0	0.157876	119	1495	1614	0.127224	0	0	0.10144	0.0718805
18S_rRNA_M_Locati	360	A	313	4810	5123	0.171327	0	0.146292	191	2248	2439	0.258734	0	0.205618	61	1200	1261	0.133791	0	0.118086	0.156665	0.0364799
18S_rRNA_M_Locati	361	U	347	5745	6092	0.153606	0	0	288	2255	2543	0.118344	0	0.105858	98	1359	1457	0.0673983	0	0	0.0352859	0.0499018
18S_rRNA_M_Locati	362	C	635	6566	7201	0.394559	0	0	417	3149	3566	0.284762	0	0	329	1562	1891	0.336281	0	0	0	0
18S_rRNA_M_Locati	363	G	315	2602	2917	0.533996	0.0418693	0.348186	290	1354	1644	0.636305	0.0418925	0.389012	155	792	947	0.392604	0.00874457	0.282135	0.339777	0.0440356
18S_rRNA_M_Locati	364	C	556	4288	4844	0.222172	0	0	358	2742	3100	0.192651	0	0	291	1314	1605	0.280185	0	0	0	0
18S_rRNA_M_Locati	365	G	183	1648	1831	0.904227	0.168133	0.474989	150	1768	1918	0.309768	0	0.2366	78	544	622	0.858659	0.177443	0.462377	0.391322	0.109526
18S_rRNA_M_Locati	366	C	582	2267	2849	0.0258558	0	0.0252127	414	3516	3930	0.410998	0	0	269	991	1260	0.189603	0	0	0.00840423	0.0118854
18S_rRNA_M_Locati	367	G	439	988	1427	0.877754	0.111059	0.467623	195	1047	1242	1.031	0.127663	0.507833	123	430	553	0.88215	0.168296	0.469143	0.481533	0.0186072
18S_rRNA_M_Locati	368	C	524	998	1522	0.54737	0	0.353892	292	1273	1565	0.757202	0	0.43107	197	616	813	0.190186	0	0.15996	0.314974	0.11405
18S_rRNA_M_Locati	369	C	562	1022	1584	0.270494	0	0.21301	294	1367	1661	0.625752	0	0.385043	274	632	906	0.0313733	0	0	0.199351	0.157489
18S_rRNA_M_Locati	370	C	539	845	1384	0.379824	0	0.275414	426	2700	3126	0.18325	0	0	285	376	661	0.315072	0	0.239861	0.171758	0.122316
18S_rRNA_M_Locati	371	U	550	688	1238	0.438902	0.00413168	0.305197	748	1778	2526	0.0688124	0	0.0644059	325	515	840	0.0344299	0	0	0.123201	0.131349
18S_rRNA_M_Locati	372	C	667	827	1494	0.207239	0	0.171759	2927	836	3763	0.31287	0	0	272	847	1119	0.292649	0	0	0.0572529	0.0809678
18S_rRNA_M_Locati	373	G	722	329	1051	0.736259	0.160982	0.424281	529	325	854	2.26986	0.00474817	0.694425	339	319	658	0.227449	0	0.185532	0.434746	0.207887
18S_rRNA_M_Locati	374	C	2010	1004	3014	0.439403	0	0	7074	651	7725	0.740377	0	0	491	584	1075	0.2788	0	0	0	0
18S_rRNA_M_Locati	375	G	1207	1083	2290	0.216582	0	0	1047	583	1630	0.591437	0	0.37178	202	377	579	0.380402	0	0.275918	0.215899	0.1576
18S_rRNA_M_Locati	376	G	758	588	1346	0.410014	0	0.29094	673	288	961	1.61458	0	0.617774	172	258	430	0.817066	0.0961011	0.450237	0.452984	0.133444
18S_rRNA_M_Locati	377	C	1079	1168	2247	0.181312	0	0	2953	668	3621	0.437257	0	0	235	733	968	0.2595	0	0	0	0
18S_rRNA_M_Locati	378	G	1236	1267	2503	0.270554	0	0	1027	650	1677	0.233784	0	0.189577	532	388	920	0.248993	0	0	0.0631922	0.0893673
18S_rRNA_M_Locati	379	G	809	696	1505	0.257644	0	0.20497	510	272	782	1.43728	0	0.590015	362	236	598	0.11944	0	0.106855	0.300614	0.208521
18S_rRNA_M_Locati	380	C	1485	880	2365	0.256593	0	0	930	630	1560	0.0969749	0	0.0884537	350	614	964	0.390305	0	0	0.0294846	0.0416975
18S_rRNA_M_Locati	381	G	723	591	1314	0.332505	0	0.249676	413	244	657	1.12577	0.040385	0.529961	230	95	325	0.854056	0.086452	0.461405	0.413681	0.119298
18S_rRNA_M_Locati	382	A	756	470	1226	0.46577	0	0.317942	552	263	815	0.7346	0	0.423798	325	84	409	0.441138	0	0.306623	0.349454	0.0527715
18S_rRNA_M_Locati	383	C	1127	1034	2161	0.217068	0	0	1218	844	2062	0.385986	0	0	547	220	767	0.307176	0	0	0	0
18S_rRNA_M_Locati	384	G	962	663	1625	0.0638513	0	0.0600537	548	478	1026	0.224267	0	0.183331	343	95	438	0.212124	0	0.175331	0.139572	0.0563225
18S_rRNA_M_Locati	385	G	652	312	964	0.842786	0.11072	0.457601	412	381	793	0.598839	0	0.374841	187	69	256	1.01881	0.117688	0.505632	0.446025	0.0540191
18S_rRNA_M_Locati	386	U	824	337	1161	0.462096	0	0.316237	506	428	934	0.324171	0	0.245008	168	98	266	0.816022	0	0.450274	0.337173	0.0850971
18S_rRNA_M_Locati	387	U	988	355	1343	0.218113	0	0.179168	467	415	882	0.3774	0	0.27422	241	117	358	0.22705	0	0.185459	0.212949	0.0434014
18S_rRNA_M_Locati	388	C	2903	586	3489	0.605896	0	0	2048	779	2827	0.643136	0	0	584	278	862	0.555079	0	0	0	0
18S_rRNA_M_Locati	389	A	1217	365	1582	0.0170211	0	0	698	447	1145	0.041051	0	0.0394653	269	138	407	0.0581427	0	0.0550755	0.0315136	0.0231768
18S_rRNA_M_Locati	390	U	1396	522	1918	0.255874	0	0	712	450	1162	0.0293876	0	0	346	178	524	0.268381	0	0	0	0
18S_rRNA_M_Locati	391	U	1360	509	1869	0.262983	0	0	684	531	1215	0.0655885	0	0	264	182	446	0.146358	0	0	0	0
18S_rRNA_M_Locati	392	C	26	143	169	8.28235	0.718867	0.892834	40	237	277	3.81095	0.455375	0.792734	2	66	68	5.34686	0.61147	0.84437	0.843313	0.0408728
18S_rRNA_M_Locati	393	G	787	482	1269	0.160359	0	0.138291	383	425	808	0.704436	0	0.413596	69	258	327	0.291972	0	0.226524	0.25947	0.114782
18S_rRNA_M_Locati	394	A	408	553	961	0.519566	0	0.342151	296	729	1025	0.35653	0	0.263014	66	322	388	0.0766352	0	0.0713507	0.225505	0.113691
18S_rRNA_M_Locati	395	A	333	544	877	0.554227	0	0.356855	311	691	1002	0.373701	0	0.272237	81	344	425	0.087011	0	0	0.209697	0.152249
18S_rRNA_M_Locati	396	U	277	938	1215	0.0907072	0	0.0832264	317	1050	1367	0.0637752	0	0.059993	41	208	249	0.644444	0.0252947	0.392847	0.178689	0.15173
18S_rRNA_M_Locati	397	G	575	866	1441	0.089251	0	0	407	1279	1686	0.0915366	0	0	96	279	375	0.066578	0	0.0625781	0.0208594	0.0294996
18S_rRNA_M_Locati	398	U	748	1158	1906	0.322374	0	0	634	2117	2751	0.452895	0	0	156	489	645	0.392776	0	0	0	0
18S_rRNA_M_Locati	399	C	855	1388	2243	0.37653	0	0	640	1982	2622	0.351218	0	0	190	442	632	0.290907	0	0	0	0
18S_rRNA_M_Locati	400	U	256	527	783	1.03084	0.166908	0.507912	258	730	988	0.977778	0.133389	0.494635	95	292	387	0.275115	0	0.216194	0.406247	0.134497
18S_rRNA_M_Locati	401	G	414	1001	1415	0.107352	0	0.097007	313	1255	1568	0.252397	0	0.201634	82	213	295	0.831757	0.105402	0.454915	0.251185	0.150258
18S_rRNA_M_Locati	402	C	318	930	1248	0.382217	0	0.276685	375	1868	2243	0.0953159	0	0	92	246	338	0.744739	0.0958228	0.427571	0.234752	0.177056
18S_rRNA_M_Locati	403	C	828	818	1646	0.0374148	0	0.0360866	774	1249	2023	0.0135705	0	0.0133953	274	192	466	0.29448	0	0.227866	0.0924493	0.0962012
18S_rRNA_M_Locati	404	C	994	857	1851	0.0788577	0	0	611	1256	1867	0.0881751	0	0.0810701	452	244	696	0.131229	0	0	0.0270234	0.0382168
18S_rRNA_M_Locati	405	U	909	1621	2530	0.343738	0	0	622	2367	2989	0.388484	0	0	461	516	977	0.394229	0	0	0	0
18S_rRNA_M_Locati	406	A	530	837	1367	0.338125	0	0.252824	308	1237	1545	0.255031	0	0.203312	269	256	525	0.270997	0	0.213536	0.223224	0.0213427
18S_rRNA_M_Locati	407	U	696	902	1598	0.192412	0	0.161448	449	1650	2099	0.0999365	0	0	306	617	923	0.297679	0	0	0.0538161	0.0761075
18S_rRNA_M_Locati	408	C	1843	1270	3113	0.415022	0	0	1731	1571	3302	0.477038	0	0	686	452	1138	0.431987	0	0	0	0
18S_rRNA_M_Locati	409	A	445	712	1157	0.906544	0.153256	0.475706	350	524	874	1.27299	0.243236	0.560333	140	215	355	1.125	0.236027	0.530113	0.52205	0.0350158
18S_rRNA_M_Locati	410	A	913	456	1369	0.608418	0.0453633	0.378443	658	251	909	1.09686	0.170645	0.523371	425	104	529	0.379979	0.0116726	0.275728	0.392514	0.101588
18S_rRNA_M_Locati	411	C	1302	899	2201	0.0360329	0	0	907	554	1461	0.219182	0	0.179879	552	149	701	0.0282526	0	0	0.0599597	0.0847958
18S_rRNA_M_Locati	412	U	1426	1044	2470	0.159971	0	0	1040	716	1756	0.0675141	0	0	548	257	805	0.218156	0	0	0	0
18S_rRNA_M_Locati	413	U	1411	880	2291	0.0450844	0	0	1142	529	1671	0.0144205	0	0	452	227	679	0.0160458	0	0	0	0
18S_rRNA_M_Locati	414	U	1928	817	2745	0.218135	0	0	1462	381	1843	0.150633	0	0	523	153	676	0.0100443	0	0	0	0
18S_rRNA_M_Locati	415	C	2314	1556	3870	0.483694	0	0	2417	254	2671	0.475595	0	0	676	107	783	0.131434	0	0	0	0
18S_rRNA_M_Locati	416	G	722	648	1370	0.721055	0.0924724	0.419139	739	381	1120	0.439548	0.00170652	0.305527	273	212	485	0.597348	0.052323	0.374445	0.36637	0.046732
18S_rRNA_M_Locati	417	A	743	720	1463	0.625493	0.0933931	0.384964	705	353	1058	0.577715	0.0818662	0.366391	161	91	252	2.27233	0.408737	0.695247	0.482201	0.150837
18S_rRNA_M_Locati	418	U	486	1110	1596	0.450108	0.00672347	0.31053	544	515	1059	0.559539	0.0658507	0.359002	108	260	368	1.20849	0.14634	0.547875	0.405802	0.102391
18S_rRNA_M_Locati	419	G	1543	1178	2721	0.22319	0	0	1143	582	1725	0.0952942	0	0	1063	127	1190	0.402174	0	0	0	0
18S_rRNA_M_Locati	420	G	813	801	1614	0.357021	0	0.263212	667	440	1107	0.475341	0.0311063	0.322388	865	162	1027	0.302032	0	0	0.1952	0.140125
18S_rRNA_M_Locati	421	U	1642	1195	2837	0.30047	0	0	1254	854	2108	0.266677	0	0	1156	339	1495	0.572126	0	0	0	0
18S_rRNA_M_Locati	422	A	1861	962	2823	0.345503	0	0	1233	481	1714	0.103725	0	0	942	345	1287	0.515097	0	0	0	0
18S_rRNA_M_Locati	423	G	1261	1054	2315	0.179491	0	0	1138	1012	2150	0.293419	0	0	290	357	647	0.0306927	0	0.0298234	0.00994113	0.0140589
18S_rRNA_M_Locati	424	G	910	494	1404	0.445148	0.047272	0.308181	666	530	1196	0.39754	0.0323129	0.284627	139	117	256	1.73558	0.231342	0.635351	0.409386	0.16007
18S_rRNA_M_Locati	425	U	952	293	1245	0.615802	0.110036	0.381302	674	783	1457	0.121536	0	0.108432	107	122	229	1.94671	0.291861	0.661615	0.383783	0.225843
18S_rRNA_M_Locati	426	C	1171	378	1549	0.229821	0	0.186971	1068	509	1577	0.0150965	0	0.0148812	85	97	182	2.54857	0.32421	0.719304	0.307052	0.299853
18S_rRNA_M_Locati	427	C	906	908	1814	0.0376247	0	0.0362797	1208	959	2167	0.28219	0	0	39	275	314	1.00554	0.014815	0.502176	0.179485	0.228657
18S_rRNA_M_Locati	428	G	917	547	1464	0.303921	0.00278299	0.233205	628	589	1217	0.382157	0.0289767	0.276657	208	218	426	0.462998	0	0.316979	0.275614	0.0342089
18S_rRNA_M_Locati	429	U	1310	531	1841	0.00839064	0	0	1116	454	1570	0.0295	0	0.0286724	413	157	570	0.101051	0	0.0919229	0.0401984	0.0384022
18S_rRNA_M_Locati	430	C	1766	953	2719	0.35069	0	0	1154	695	1849	0.156811	0	0	473	359	832	0.155262	0	0	0	0
18S_rRNA_M_Locati	431	G	932	622	1554	0.333941	0	0.250462	642	346	988	0.827401	0.121921	0.453026	403	120	523	0.733333	0.0370074	0.423543	0.375677	0.0893546
18S_rRNA_M_Locati	432	C	1056	666	1722	0.235881	0	0.19095	891	570	1461	0.226516	0	0.184786	710	285	995	0.00436189	0	0	0.125245	0.0885975
18S_rRNA_M_Locati	433	C	1205	791	1996	0.14366	0	0.125669	1100	674	1774	0.0612207	0	0.0577195	758	329	1087	0.0411969	0	0.0396018	0.0743302	0.037048
18S_rRNA_M_Locati	434	U	1567	956	2523	0.075832	0	0	1670	919	2589	0.278666	0	0	873	438	1311	0.0633723	0	0	0	0
18S_rRNA_M_Locati	435	A	973	660	1633	0.53844	0.0435562	0.35013	777	430	1207	0.743948	0.0729667	0.426791	605	418	1023	0.311599	0	0.237749	0.338223	0.0776339
18S_rRNA_M_Locati	436	C	1079	1514	2593	0.034794	0	0	889	704	1593	0.368242	0	0.269259	968	846	1814	0.270493	0	0	0.0897529	0.12693
18S_rRNA_M_Locati	437	C	3637	473	4110	0.427122	0	0	3394	406	3800	0.481897	0	0	2235	184	2419	0.469068	0	0	0	0
18S_rRNA_M_Locati	438	A	1576	304	1880	0.416055	0	0.293923	1276	356	1632	0.379472	0	0.275207	1484	124	1608	0.138858	0	0	0.18971	0.134363
18S_rRNA_M_Locati	439	U	2276	1932	4208	0.416079	0	0	1923	1303	3226	0.351014	0	0	1445	360	1805	0.255156	0	0	0	0
18S_rRNA_M_Locati	440	G	1871	849	2720	0.0291804	0	0.0283632	1331	1314	2645	0.13689	0	0	1046	380	1426	0.0168263	0	0	0.00945441	0.0133706
18S_rRNA_M_Locati	441	G	1109	701	1810	0.592895	0	0.372341	712	982	1694	0.372167	0	0.271342	625	268	893	0.585272	0.0613612	0.369454	0.337713	0.0469458
18S_rRNA_M_Locati	442	U	1600	1137	2737	0.0465912	0	0.0445326	1403	1409	2812	0.204057	0	0	603	526	1129	0.219971	0	0.180439	0.0749905	0.0767477
18S_rRNA_M_Locati	443	G	1213	1079	2292	0.287149	0	0.223165	648	1007	1655	0.455884	0	0.313262	462	490	952	0.427445	0.0136821	0.299668	0.278698	0.0396583
18S_rRNA_M_Locati	444	A	855	1132	1987	0.497764	0.0198445	0.33245	496	575	1071	1.24592	0.207323	0.554978	345	374	719	0.882006	0.190407	0.468998	0.452142	0.0916253
18S_rRNA_M_Locati	445	C	1146	1788	2934	0.0125535	0	0	859	1156	2015	0.135626	0	0.119481	674	495	1169	0.0939886	0	0.0859809	0.0684872	0.0503218
18S_rRNA_M_Locati	446	C	3768	1616	5384	0.531107	0	0	2994	1344	4338	0.552414	0	0	1255	777	2032	0.435208	0	0	0	0
18S_rRNA_M_Locati	447	A	1319	720	2039	0.425888	0	0.298785	844	513	1357	0.645533	0	0.39247	585	450	1035	0.204204	0	0.169712	0.286989	0.0913221
18S_rRNA_M_Locati	448	C	1953	1364	3317	0.166493	0	0	1339	1033	2372	0.120892	0	0	788	644	1432	0.162891	0	0	0	0
18S_rRNA_M_Locati	449	G	1801	1261	3062	0.042852	0	0	1350	1393	2743	0.237455	0	0	836	649	1485	0.190167	0	0	0	0
18S_rRNA_M_Locati	450	G	1727	1567	3294	0.0975653	0	0	1288	1121	2409	0.0930659	0	0	1071	728	1799	0.33616	0	0	0	0
18S_rRNA_M_Locati	451	G	807	872	1679	0.902143	0.121039	0.474426	438	717	1155	1.06331	0.142677	0.515559	528	313	841	0.567247	0.0861133	0.362213	0.450732	0.064806
18S_rRNA_M_Locati	452	U	1094	928	2022	0.56676	0.0179099	0.361854	690	898	1588	0.508237	0	0.337115	534	331	865	0.516654	0.0710341	0.340913	0.346628	0.0108781
18S_rRNA_M_Locati	453	G	1247	1369	2616	0.136131	0	0.11986	720	1025	1745	0.327313	0	0.246705	512	396	908	0.384281	0.0272235	0.277824	0.214796	0.0683215
18S_rRNA_M_Locati	454	A	943	1377	2320	0.319604	0	0.242276	607	894	1501	0.638674	0.113331	0.389909	471	373	844	0.519198	0.0927055	0.342024	0.324736	0.0614982
18S_rRNA_M_Locati	455	C	1820	3939	5759	0.544444	0	0	2316	1759	4075	0.458939	0	0	625	809	1434	0.165606	0	0	0	0
18S_rRNA_M_Locati	456	G	1529	2232	3761	0.249002	0	0	1226	1658	2884	0.168639	0	0	929	797	1726	0.321984	0	0	0	0
18S_rRNA_M_Locati	457	G	1243	1563	2806	0.0961525	0	0.0877467	1026	1334	2360	0.15084	0	0.131118	712	611	1323	0.0326788	0	0	0.0729548	0.0545409
18S_rRNA_M_Locati	458	G	1741	1377	3118	0.0127961	0	0.0126385	1398	1819	3217	0.121266	0	0	508	907	1415	0.0191227	0	0	0.00421282	0.00595782
18S_rRNA_M_Locati	459	G	1240	924	2164	0.545137	0	0.352914	898	1530	2428	0.271182	0	0.213399	314	782	1096	0.396516	0	0.284118	0.283477	0.0569583
18S_rRNA_M_Locati	460	A	1254	958	2212	0.563599	0.0139307	0.360554	966	1552	2518	0.30389	0	0.233135	420	830	1250	0.314584	0	0.239449	0.277713	0.0586343
18S_rRNA_M_Locati	461	A	1086	933	2019	0.758229	0.0880382	0.431367	729	1431	2160	0.602653	0.0834176	0.376143	162	713	875	1.03984	0.251566	0.510051	0.439187	0.0549465
18S_rRNA_M_Locati	462	U	1387	1224	2611	0.318304	0	0.24152	1040	1940	2980	0.153807	0	0.133343	700	753	1453	0.239126	0.00137805	0.193087	0.189317	0.0442434
18S_rRNA_M_Locati	463	C	4704	1664	6368	0.50832	0	0	4865	1584	6449	0.510696	0	0	1603	1127	2730	0.362334	0	0	0	0
18S_rRNA_M_Locati	464	A	2514	1486	4000	0.0689328	0	0	2979	933	3912	0.0500014	0	0	1424	1223	2647	0.302774	0	0	0	0
18S_rRNA_M_Locati	465	G	1990	1488	3478	0.11449	0	0.102755	2702	896	3598	0.0376957	0	0.036336	1248	1010	2258	0.153627	0	0	0.0463637	0.0425447
18S_rRNA_M_Locati	466	G	2978	1662	4640	0.174481	0	0	3122	1333	4455	0.184772	0	0	1491	1107	2598	0.279223	0	0	0	0
18S_rRNA_M_Locati	467	G	1628	1253	2881	0.417496	0	0.294603	1784	934	2718	0.400564	0	0.286077	956	762	1718	0.133269	0	0.117657	0.232779	0.0814778
18S_rRNA_M_Locati	468	U	1794	1740	3534	0.103269	0	0.0936267	2286	1455	3741	0.0561494	0	0	889	939	1828	0.0106859	0	0.0105786	0.0347351	0.041866
18S_rRNA_M_Locati	469	U	2059	2359	4418	0.152382	0	0	2274	1297	3571	0.0524667	0	0	1323	855	2178	0.201667	0	0	0	0
18S_rRNA_M_Locati	470	C	3847	3544	7391	0.571519	0	0	4415	2019	6434	0.572037	0	0	866	1279	2145	0.262804	0	0	0	0
18S_rRNA_M_Locati	471	G	1694	1620	3314	0.0465896	0	0.0445284	1283	741	2024	0.50484	0	0.335587	430	777	1207	0.257653	0	0.205003	0.19504	0.119033
18S_rRNA_M_Locati	472	A	1440	1353	2793	0.188857	0	0.158904	1422	790	2212	0.266677	0	0.210608	332	724	1056	0.305866	0	0.234394	0.201302	0.0315135
18S_rRNA_M_Locati	473	U	1137	1534	2671	0.170488	0	0.145702	1723	703	2426	0.065426	0	0.0614321	202	944	1146	0.0625109	0	0.0588815	0.0886719	0.0403399
18S_rRNA_M_Locati	474	U	38	56	94	33.7871	0.922886	0.971548	120	59	179	14.1638	0.82169	0.934396	32	62	94	12.0789	0.80876	0.924285	0.94341	0.0203204
18S_rRNA_M_Locati	475	C	1013	1607	2620	0.114825	0	0.103033	1055	505	1560	0.571001	0	0.363612	933	519	1452	0.317588	0	0	0.155548	0.153018
18S_rRNA_M_Locati	476	C	1111	2202	3313	0.203933	0	0	1582	1246	2828	0.219379	0	0	550	497	1047	0.123802	0	0	0	0
18S_rRNA_M_Locati	477	G	1200	1576	2776	0.107802	0	0	1233	915	2148	0.0415956	0	0	482	316	798	0.0566681	0	0.0536926	0.0178975	0.0253109
18S_rRNA_M_Locati	478	G	1075	979	2054	0.222617	0	0.182155	1018	917	1935	0.0879132	0	0.0808474	271	370	641	0.261059	0	0.207272	0.156758	0.0546475
18S_rRNA_M_Locati	479	A	1464	1574	3038	0.196406	0	0	1563	1375	2938	0.297357	0	0	203	675	878	0.113424	0	0	0	0
18S_rRNA_M_Locati	480	G	887	1560	2447	0.02436	0	0.0237902	1040	1085	2125	0.0143096	0	0.0141143	86	676	762	0.0233435	0	0.0228403	0.0202483	0.00435468
18S_rRNA_M_Locati	481	A	807	2280	3087	0.170394	0	0	1003	1450	2453	0.0757267	0	0	60	688	748	0.194259	0	0.162843	0.0542809	0.0767648
18S_rRNA_M_Locati	482	G	327	941	1268	1.20322	0.296012	0.546315	436	1615	2051	0.155853	0	0.134895	46	367	413	1.38363	0.229765	0.58106	0.420757	0.202632
18S_rRNA_M_Locati	483	G	969	2378	3347	0.204172	0	0	754	1022	1776	0.416976	0.0472785	0.294389	205	413	618	0.823192	0.0619532	0.451912	0.248767	0.187291
18S_rRNA_M_Locati	484	G	889	1269	2158	0.324837	0	0.245276	678	1331	2009	0.275556	0	0.216112	140	404	544	1.34379	0.245207	0.57379	0.345059	0.162175
18S_rRNA_M_Locati	485	A	1380	1948	3328	0.12786	0	0	991	2232	3223	0.186793	0	0	413	862	1275	0.0925462	0	0.0847677	0.0282559	0.0399599
18S_rRNA_M_Locati	486	G	849	1353	2202	0.423503	0.0325822	0.297603	609	1263	1872	0.538732	0.0860321	0.350236	652	376	1028	0.541108	0.0723582	0.351338	0.333059	0.0250752
18S_rRNA_M_Locati	487	C	1236	1413	2649	0.208017	0	0.172251	920	2022	2942	0.0112886	0	0	1165	1135	2300	0.307311	0	0	0.0574169	0.0811998
18S_rRNA_M_Locati	488	C	1267	1917	3184	0.0218455	0	0.021385	804	1848	2652	0.151125	0	0.131327	1225	891	2116	0.169296	0	0	0.0509041	0.057534
18S_rRNA_M_Locati	489	U	1918	3163	5081	0.372931	0	0	1669	3020	4689	0.38041	0	0	2171	1150	3321	0.48037	0	0	0	0
18S_rRNA_M_Locati	490	G	1389	1625	3014	0.185871	0	0.156782	943	1722	2665	0.258544	0	0.205492	1133	876	2009	0.010293	0	0	0.120758	0.0876738
18S_rRNA_M_Locati	491	A	2189	2391	4580	0.225397	0	0	1715	2995	4710	0.306837	0	0	1500	1233	2733	0.265854	0	0	0	0
18S_rRNA_M_Locati	492	G	1672	2061	3733	0.0309826	0	0	1253	2219	3472	0.0361391	0	0	800	1156	1956	0.0723784	0	0.0675255	0.0225085	0.0318318
18S_rRNA_M_Locati	493	A	1564	1671	3235	0.140135	0	0.122944	1389	2040	3429	0.0081989	0	0	697	1047	1744	0.219822	0	0.180293	0.101079	0.0752106
18S_rRNA_M_Locati	494	A	1889	1760	3649	0.0135221	0	0	1372	1489	2861	0.210109	0	0.173679	621	1147	1768	0.167546	0	0.143572	0.10575	0.0757801
18S_rRNA_M_Locati	495	A	1610	1326	2936	0.21116	0	0.174394	1096	1301	2397	0.446923	0.0147787	0.308967	579	772	1351	0.505695	0.0617328	0.33602	0.273127	0.0706828
18S_rRNA_M_Locati	496	C	2957	2329	5286	0.424339	0	0	3058	1925	4983	0.391834	0	0	1394	878	2272	0.206526	0	0	0	0
18S_rRNA_M_Locati	497	G	1960	2366	4326	0.305808	0	0	1940	2190	4130	0.239068	0	0	1413	1090	2503	0.307073	0	0	0	0
18S_rRNA_M_Locati	498	G	889	1342	2231	0.315606	0	0.239976	782	845	1627	0.975014	0.177733	0.493828	1055	540	1595	0.0803119	0	0.0743845	0.269396	0.172496
18S_rRNA_M_Locati	499	C	772	1731	2503	0.0733404	0	0.0683546	997	2100	3097	0.0331146	0	0	908	833	1741	0.0339329	0	0	0.0227849	0.0322227
18S_rRNA_M_Locati	500	U	1086	1254	2340	0.0511415	0	0.0486731	1458	1845	3303	0.146597	0	0	1182	563	1745	0.0752005	0	0	0.0162244	0.0229447
18S_rRNA_M_Locati	501	A	533	1034	1567	0.458773	0	0.31463	771	1433	2204	0.269438	0	0.212326	761	368	1129	0.422517	0.02518	0.297206	0.27472	0.0446894
18S_rRNA_M_Locati	502	C	586	998	1584	0.275044	0	0.21582	855	1666	2521	0.0214248	0	0.0209835	905	379	1284	0.153506	0	0.133168	0.123324	0.0798456
18S_rRNA_M_Locati	503	C	1025	935	1960	0.143215	0	0	2179	1625	3804	0.425721	0	0	1349	301	1650	0.192429	0	0	0	0
18S_rRNA_M_Locati	504	A	474	481	955	0.634682	0.0736224	0.388509	654	787	1441	0.541794	0	0.351563	845	184	1029	0.226321	0	0.184699	0.308257	0.0886608
18S_rRNA_M_Locati	505	C	1112	892	2004	0.323314	0	0	2020	1339	3359	0.434024	0	0	1790	275	2065	0.492406	0	0	0	0
18S_rRNA_M_Locati	506	A	391	505	896	0.569491	0.04278	0.363109	604	607	1211	0.65947	0.0507756	0.397596	836	155	991	0.0935932	0	0.0856621	0.282122	0.13963
18S_rRNA_M_Locati	507	U	371	588	959	0.395984	0	0.283871	628	445	1073	0.728916	0.0300151	0.42183	722	172	894	0.119988	0	0.10724	0.27098	0.128754
18S_rRNA_M_Locati	508	C	4	153	157	7.54641	0.67723	0.883646	5	261	266	5.69422	0.562735	0.851093	14	39	53	17.6782	0.846567	0.947401	0.894047	0.0399993
18S_rRNA_M_Locati	509	C	781	722	1503	0.164199	0	0	1254	661	1915	0.212439	0	0	808	251	1059	0.171709	0	0	0	0
18S_rRNA_M_Locati	510	A	245	899	1144	0.192208	0	0.161338	463	613	1076	0.381812	0	0.276498	247	237	484	0.90362	0	0.4752	0.304345	0.129638
18S_rRNA_M_Locati	511	A	315	1365	1680	0.177758	0	0	617	935	1552	0.0871002	0	0	220	401	621	0.44707	0	0.309292	0.103097	0.145802
18S_rRNA_M_Locati	512	G	475	1324	1799	0.148796	0	0	485	1767	2252	0.385792	0	0	388	601	989	0.128709	0	0	0	0
18S_rRNA_M_Locati	513	G	496	1109	1605	0.0731908	0	0.0682388	292	1209	1501	0.0398506	0	0.0383479	285	572	857	0.100958	0	0.0917976	0.0661281	0.0218717
18S_rRNA_M_Locati	514	A	13	67	80	23.9731	0.881779	0.960432	8	139	147	11.0191	0.738062	0.917315	8	153	161	5.68731	0.634345	0.851249	0.909665	0.0449008
18S_rRNA_M_Locati	515	A	701	1989	2690	0.260027	0	0	400	1280	1680	0.116531	0	0.104425	429	1219	1648	0.358931	0	0	0.0348082	0.0492262
18S_rRNA_M_Locati	516	G	758	1852	2610	0.16419	0	0	375	1421	1796	0.105651	0	0.0956039	382	1084	1466	0.21127	0	0	0.031868	0.0450681
18S_rRNA_M_Locati	517	G	278	1404	1682	0.462805	0	0.31651	151	1063	1214	0.823887	0.0552799	0.451924	215	659	874	0.51981	0.0267612	0.34228	0.370238	0.058711
18S_rRNA_M_Locati	518	C	972	3168	4140	0.456422	0	0	1248	2741	3989	0.506636	0	0	485	1336	1821	0.288249	0	0	0	0
18S_rRNA_M_Locati	519	A	760	2041	2801	0.090138	0	0	413	1912	2325	0.0119614	0	0	393	1239	1632	0.0832279	0	0	0	0
18S_rRNA_M_Locati	520	G	328	1440	1768	0.53491	0	0.348624	160	1322	1482	0.65829	0	0.397131	198	954	1152	0.395018	0	0.283339	0.343032	0.0466231
18S_rRNA_M_Locati	521	C	985	2770	3755	0.296953	0	0	2770	1825	4595	0.498832	0	0	503	1465	1968	0.153022	0	0	0	0
18S_rRNA_M_Locati	522	A	988	2226	3214	0.180411	0	0	923	1788	2711	0.0792117	0	0	634	993	1627	0.0606265	0	0.0571942	0.0190647	0.0269616
18S_rRNA_M_Locati	523	G	991	1765	2756	0.0131625	0	0	585	1858	2443	0.0422213	0	0.0405268	504	1121	1625	0.109457	0	0.0987132	0.0464133	0.0405139
18S_rRNA_M_Locati	524	G	578	1119	1697	0.605785	0	0.37739	361	1050	1411	0.820798	0	0.450966	413	931	1344	0.366766	0	0.268492	0.365616	0.0749584
18S_rRNA_M_Locati	525	C	1431	2158	3589	0.348487	0	0	774	2823	3597	0.405556	0	0	837	2837	3674	0.578915	0	0	0	0
18S_rRNA_M_Locati	526	G	751	1011	1762	0.436428	0	0.303949	455	1073	1528	0.519722	0	0.342132	388	660	1048	0.760862	0	0.43233	0.35947	0.0538265
18S_rRNA_M_Locati	527	C	1346	1546	2892	0.182621	0	0	789	2641	3430	0.394203	0	0	718	1766	2484	0.32567	0	0	0	0
18S_rRNA_M_Locati	528	G	604	963	1567	0.546372	0	0.353471	264	816	1080	1.06967	0.113163	0.517062	112	1270	1382	0.276934	0	0.216997	0.36251	0.122668
18S_rRNA_M_Locati	529	C	2392	1373	3765	0.457585	0	0	1389	1283	2672	0.267286	0	0	347	2009	2356	0.326814	0	0	0	0
18S_rRNA_M_Locati	530	A	49	42	91	24.8339	0.886817	0.961696	34	103	137	14.9451	0.81878	0.937711	15	366	381	3.53104	0.475261	0.77975	0.893052	0.0807128
18S_rRNA_M_Locati	531	A	1260	529	1789	0.204711	0	0.170004	803	721	1524	0.356342	0	0.26285	504	813	1317	0.189091	0	0.159123	0.197326	0.0465451
18S_rRNA_M_Locati	532	A	2774	473	3247	0.361494	0	0	1791	483	2274	0.0437802	0	0	1053	680	1733	0.176644	0	0	0	0
18S_rRNA_M_Locati	533	U	1394	525	1919	0.153582	0	0.133195	1287	1000	2287	0.00777486	0	0	666	886	1552	0.0651427	0	0	0.0443984	0.0627888
18S_rRNA_M_Locati	534	U	2090	537	2627	0.217808	0	0	2139	1174	3313	0.342875	0	0	936	849	1785	0.239474	0	0	0	0
18S_rRNA_M_Locati	535	A	1126	213	1339	0.612488	0	0.380016	870	582	1452	0.72275	0	0.4197	656	373	1029	0.358511	0	0.264089	0.354602	0.0660209
18S_rRNA_M_Locati	536	C	1184	353	1537	0.288759	0	0.224173	910	856	1766	0.41911	0	0.295451	600	173	773	0.734396	0.00663147	0.423746	0.314456	0.0825764
18S_rRNA_M_Locati	537	C	1318	391	1709	0.199025	0	0.16607	1060	992	2052	0.270883	0	0.213227	840	245	1085	0.251391	0	0.201037	0.193445	0.0199863
18S_rRNA_M_Locati	538	C	4632	576	5208	0.682236	0	0	5274	1344	6618	0.679745	0	0	1807	473	2280	0.432603	0	0	0	0
18S_rRNA_M_Locati	539	A	808	373	1181	0.665172	0	0.399665	1288	701	1989	0.284372	0	0.221496	1033	281	1314	0.0547613	0	0.0519557	0.224372	0.141966
18S_rRNA_M_Locati	540	U	944	394	1338	0.37255	0	0.271577	1963	616	2579	0.0943368	0	0	1106	298	1404	0.0432661	0	0	0.0905256	0.128023
18S_rRNA_M_Locati	541	U	420	431	851	1.11032	0	0.52643	1474	520	1994	0.124617	0	0.110858	441	263	704	0.991647	0.0727932	0.498258	0.378515	0.189611
18S_rRNA_M_Locati	542	U	513	310	823	1.14386	0	0.533855	1816	424	2240	0.0654123	0	0	501	316	817	0.702866	0	0.413051	0.315635	0.228572
18S_rRNA_M_Locati	543	C	1648	319	1967	0.166029	0	0	1281	342	1623	0.257321	0	0.204758	1316	167	1483	0.1059	0	0	0.0682528	0.096524
18S_rRNA_M_Locati	544	C	1879	698	2577	0.400022	0	0	1476	505	1981	0.0731248	0	0	2438	333	2771	0.57959	0	0	0	0
18S_rRNA_M_Locati	545	G	551	591	1142	0.334432	0	0.250782	611	346	957	0.648585	0.141351	0.393668	1026	254	1280	0.0240177	0	0	0.214817	0.162714
18S_rRNA_M_Locati	546	A	504	394	898	0.861797	0.0848916	0.463161	551	250	801	0.878512	0.170282	0.467974	745	196	941	0.354117	0	0.261716	0.397617	0.0961166
18S_rRNA_M_Locati	547	C	799	850	1649	0.0278788	0	0.0271386	1191	533	1724	0.250087	0	0	842	459	1301	0.086158	0	0	0.00904621	0.0127933
18S_rRNA_M_Locati	548	A	629	636	1265	0.538661	0.0186558	0.350264	557	285	842	0.628984	0.0807141	0.386402	571	299	870	0.406876	0	0.289441	0.342036	0.0400092
18S_rRNA_M_Locati	549	C	864	1257	2121	0.112692	0	0	973	399	1372	0.115465	0	0	327	513	840	0.380196	0	0.275703	0.0919008	0.129967
18S_rRNA_M_Locati	550	G	819	874	1693	0.200748	0	0.167268	616	410	1026	0.177096	0	0.150576	368	644	1012	0.0440386	0	0.0422209	0.120022	0.0554339
18S_rRNA_M_Locati	551	G	793	865	1658	0.342656	0	0.255322	447	416	863	0.498032	0	0.332715	558	419	977	0.0154738	0	0	0.196012	0.142157
18S_rRNA_M_Locati	552	A	1445	1755	3200	0.351984	0	0	727	558	1285	0.0509245	0	0	814	714	1528	0.46554	0	0	0	0
18S_rRNA_M_Locati	553	G	1138	1587	2725	0.169593	0	0	354	919	1273	0.00784057	0	0	414	532	946	0.112507	0	0	0	0
18S_rRNA_M_Locati	554	A	1347	2473	3820	0.395955	0	0	461	1559	2020	0.36786	0	0	297	583	880	0.0857107	0	0	0	0
18S_rRNA_M_Locati	555	G	201	190	391	6.18821	0.604223	0.861189	60	506	566	1.72273	0.168369	0.633132	40	40	80	9.82963	0.751511	0.908697	0.801006	0.120279
18S_rRNA_M_Locati	556	G	1213	1767	2980	0.137996	0	0	305	585	890	0.761442	0	0.432559	244	277	521	0.539144	0	0.350725	0.261095	0.18762
18S_rRNA_M_Locati	557	U	2103	2677	4780	0.521469	0	0	599	2526	3125	0.58441	0	0	603	648	1251	0.47461	0	0	0	0
18S_rRNA_M_Locati	558	A	33	22	55	49.5827	0.923704	0.980577	11	40	51	32.197	0.870759	0.970439	5	12	17	44.0191	0.914481	0.978995	0.97667	0.00445325
18S_rRNA_M_Locati	559	G	1026	1603	2629	0.0611196	0	0	264	1131	1395	0.174323	0	0.148536	309	337	646	0.135583	0	0.119558	0.0893648	0.0642883
18S_rRNA_M_Locati	560	U	1923	2535	4458	0.510304	0	0	469	2865	3334	0.554673	0	0	377	705	1082	0.31503	0	0	0	0
18S_rRNA_M_Locati	561	G	1157	1724	2881	0.234467	0	0	268	1863	2131	0.227502	0	0	182	736	918	0.101366	0	0	0	0
18S_rRNA_M_Locati	562	A	1274	1217	2491	0.0901462	0	0	226	1542	1768	0.00182777	0	0	202	478	680	0.417752	0	0.294963	0.0983211	0.139047
18S_rRNA_M_Locati	563	C	44	33	77	29.6981	0.897285	0.967829	4	92	96	19.8485	0.872853	0.952506	11	53	64	16.3621	0.863341	0.943239	0.954525	0.0101398
18S_rRNA_M_Locati	564	G	553	1577	2130	0.0641431	0	0	132	1733	1865	0.00453138	0	0	70	1298	1368	0.219836	0	0	0	0
18S_rRNA_M_Locati	565	A	997	1342	2339	0.144416	0	0	322	1823	2145	0.0974578	0	0	108	1230	1338	0.107095	0	0	0	0
18S_rRNA_M_Locati	566	A	389	1273	1662	0.16801	0	0.143917	244	1861	2105	0.0776037	0	0	68	1554	1622	0.247299	0	0	0.0479723	0.067843
18S_rRNA_M_Locati	567	A	336	1166	1502	0.236934	0	0.191652	256	1880	2136	0.103827	0	0	56	1497	1553	0.175039	0	0	0.0638841	0.0903457
18S_rRNA_M_Locati	568	A	846	1303	2149	0.214708	0	0	397	1671	2068	0.0826916	0	0	138	1494	1632	0.216459	0	0	0	0
18S_rRNA_M_Locati	569	A	312	1132	1444	0.162453	0	0.139833	311	1796	2107	0.115639	0	0	58	1446	1504	0.14505	0	0	0.0466111	0.0659181
18S_rRNA_M_Locati	570	U	1183	1184	2367	0.319773	0	0	662	2659	3321	0.467172	0	0	112	1797	1909	0.344427	0	0	0	0
18S_rRNA_M_Locati	571	A	545	750	1295	0.257725	0	0.205039	376	1060	1436	0.300897	0	0.231423	66	1221	1287	0.0450742	0	0	0.145488	0.103438
18S_rRNA_M_Locati	572	A	289	568	857	0.883346	0.0741133	0.469321	345	698	1043	0.72732	0.0600582	0.421302	80	848	928	0.263677	0	0.208836	0.366486	0.113186
18S_rRNA_M_Locati	573	C	1779	1221	3000	0.561942	0	0	1295	1213	2508	0.409185	0	0	318	1134	1452	0.321848	0	0	0	0
18S_rRNA_M_Locati	574	A	304	745	1049	0.403249	0	0.287563	734	464	1198	0.225827	0	0.18435	70	560	630	0.519915	0.0767239	0.342426	0.271446	0.0655328
18S_rRNA_M_Locati	575	A	186	568	754	0.864327	0.0768444	0.463943	670	338	1008	0.31589	0	0.240239	23	478	501	0.741279	0.0903746	0.426197	0.376793	0.0977801
18S_rRNA_M_Locati	576	U	224	1023	1247	0.0585826	0	0.0553825	714	740	1454	0.211004	0	0	26	769	795	0.0065885	0	0.00655355	0.0206454	0.0247082
18S_rRNA_M_Locati	577	G	256	514	770	0.703257	0.0299966	0.413204	318	235	553	1.02284	0.0736068	0.506098	62	331	393	1.05477	0.0775234	0.513961	0.477755	0.0457568
18S_rRNA_M_Locati	578	C	769	901	1670	0.264665	0	0	806	367	1173	0.141302	0	0	95	407	502	0.638789	0	0.390267	0.130089	0.183974
18S_rRNA_M_Locati	579	A	330	848	1178	0.125502	0	0.111592	112	282	394	1.76062	0.2295	0.638348	39	249	288	2.16982	0.324621	0.685273	0.478404	0.260082
18S_rRNA_M_Locati	580	G	334	623	957	1.25298	0.146904	0.556401	26	342	368	2.0607	0.267821	0.673875	96	296	392	1.55688	0.313645	0.609506	0.61326	0.0480317
18S_rRNA_M_Locati	581	G	558	444	1002	1.76878	0	0.639061	227	199	426	1.95293	0.283833	0.661878	505	282	787	0.40344	0.076087	0.287726	0.529555	0.171253
18S_rRNA_M_Locati	582	U	894	578	1472	1.30097	0	0.565567	614	468	1082	0.328583	0	0.24749	1167	382	1549	0.206996	0	0	0.271019	0.23149
18S_rRNA_M_Locati	583	C	794	612	1406	1.89115	0.0357382	0.654277	1023	754	1777	0.220279	0	0.180598	1250	261	1511	0.0442387	0	0	0.278292	0.275896
18S_rRNA_M_Locati	584	U	713	1040	1753	1.55352	0	0.60852	1010	273	1283	0.968847	0	0.492283	1471	255	1726	0.103603	0	0	0.366934	0.263766
18S_rRNA_M_Locati	585	C	727	960	1687	1.90418	0	0.655802	978	346	1324	1.10632	0	0.525427	1539	174	1713	0.0411902	0	0	0.393743	0.28346
18S_rRNA_M_Locati	586	U	9998	7159	17157	0.799135	0	0	2649	407	3056	0.0614546	0	0	2162	203	2365	0.304856	0	0	0	0
18S_rRNA_M_Locati	587	U	6706	1999	8705	0.478975	0	0	2785	108	2893	0.0699416	0	0.0653907	1787	175	1962	0.130543	0	0	0.0217969	0.0308255
18S_rRNA_M_Locati	588	U	6659	1078	7737	0.409055	0	0	4165	80	4245	0.229997	0	0	2628	234	2862	0.453367	0	0	0	0
18S_rRNA_M_Locati	589	C	6426	610	7036	0.377912	0	0	13904	117	14021	0.841146	0	0	2783	170	2953	0.508662	0	0	0	0
18S_rRNA_M_Locati	590	G	1209	445	1654	1.80479	0	0.643605	1501	95	1596	1.22374	0	0.550462	902	107	1009	0.540528	0.0718622	0.351098	0.515055	0.122012
18S_rRNA_M_Locati	591	A	1345	559	1904	1.23869	0	0.55344	1528	106	1634	1.06584	0	0.516089	643	224	867	0.672568	0.0776248	0.402394	0.490641	0.064236
18S_rRNA_M_Locati	592	G	1337	487	1824	1.11593	0	0.527532	1033	343	1376	1.322	0	0.569514	571	307	878	0.481368	0	0.325198	0.474081	0.106663
18S_rRNA_M_Locati	593	G	572	527	1099	1.98247	0	0.664911	482	255	737	3.41853	0	0.773918	367	79	446	1.82588	0.20732	0.646639	0.695156	0.0561904
18S_rRNA_M_Locati	594	C	1098	620	1718	0.611518	0	0.379604	3961	115	4076	0.346366	0	0	502	76	578	1.00564	0	0.501839	0.293814	0.213667
18S_rRNA_M_Locati	595	C	1008	52	1060	1.42586	0	0.588003	2025	36	2061	0.282116	0	0.220122	780	6	786	0.328618	0	0.247575	0.3519	0.167326
18S_rRNA_M_Locati	596	C	1186	100	1286	0.867625	0	0.464754	1154	186	1340	0.545041	0	0.352938	899	20	919	0.0888647	0	0.0816938	0.299795	0.160835
18S_rRNA_M_Locati	597	U	1930	600	2530	0.0228983	0	0	901	522	1423	0.510799	0	0.338256	1146	71	1217	0.121648	0	0	0.112752	0.159455
18S_rRNA_M_Locati	598	G	807	383	1190	1.33885	0	0.572644	359	439	798	1.91371	0.0960361	0.657077	413	69	482	1.55852	0.298786	0.609643	0.613122	0.0345573
18S_rRNA_M_Locati	599	C	9026	76	9102	0.782169	0	0	5214	645	5859	0.689048	0	0	1857	77	1934	0.407275	0	0	0	0
18S_rRNA_M_Locati	600	A	1723	28	1751	0.679782	0	0.404822	1017	104	1121	1.2221	0.0942732	0.550197	1004	34	1038	0.299187	0	0.230459	0.395159	0.130711
18S_rRNA_M_Locati	601	A	2205	213	2418	0.195237	0	0.163402	1239	360	1599	0.467201	0	0.318566	1234	75	1309	0.0838592	0	0.0774255	0.186465	0.0997868
18S_rRNA_M_Locati	602	U	2279	387	2666	0.113257	0	0.101769	1332	678	2010	0.212785	0	0.175524	1801	188	1989	0.268487	0	0	0.0924308	0.0719608
18S_rRNA_M_Locati	603	U	2969	518	3487	0.160347	0	0	2067	825	2892	0.165576	0	0	1884	307	2191	0.316758	0	0	0	0
18S_rRNA_M_Locati	604	G	1791	571	2362	0.304147	0	0.233291	1408	1378	2786	0.0764781	0	0	1079	334	1413	0.187647	0	0.158093	0.130461	0.0972242
18S_rRNA_M_Locati	605	G	1522	680	2202	0.444717	0	0.30792	1132	1106	2238	0.249779	0	0.19993	827	557	1384	0.291031	0.00666939	0.225551	0.244467	0.0460708
18S_rRNA_M_Locati	606	A	1778	830	2608	0.137371	0	0.12082	1479	1495	2974	0.0598207	0	0	1052	394	1446	0.268533	0.00843832	0.211803	0.110874	0.0867537
18S_rRNA_M_Locati	607	A	1601	889	2490	0.26565	0.0269094	0.209959	796	1330	2126	0.446341	0.00580042	0.3087	938	825	1763	0.0476946	0	0.0455481	0.188069	0.108541
18S_rRNA_M_Locati	608	U	1339	2159	3498	0.0319774	0	0	1395	2638	4033	0.207156	0	0	652	1618	2270	0.166867	0	0	0	0
18S_rRNA_M_Locati	609	G	606	2362	2968	0.236065	0	0.191033	637	1347	1984	0.814878	0.12258	0.449124	358	1261	1619	0.225123	0	0.183848	0.274668	0.123393
18S_rRNA_M_Locati	610	A	505	3201	3706	0.0106076	0	0.010499	840	2855	3695	0.0598665	0	0	406	2179	2585	0.275831	0	0	0.00349967	0.00494929
18S_rRNA_M_Locati	611	G	1000	2519	3519	0.115742	0	0.103762	904	2571	3475	0.0276243	0	0.0268893	662	1475	2137	0.0931712	0	0	0.0435503	0.0439683
18S_rRNA_M_Locati	612	U	1026	4313	5339	0.271841	0	0	1210	5118	6328	0.479242	0	0	588	1838	2426	0.22138	0	0	0	0
18S_rRNA_M_Locati	613	G	628	3044	3672	0.152833	0	0.132603	573	2282	2855	0.343826	0	0.255923	336	1012	1348	0.493551	0.0659784	0.330619	0.239715	0.0816479
18S_rRNA_M_Locati	614	C	1482	5995	7477	0.487494	0	0	2338	4183	6521	0.472454	0	0	643	2132	2775	0.360499	0	0	0	0
18S_rRNA_M_Locati	615	A	721	3862	4583	0.106169	0	0	814	2402	3216	0.156212	0	0.135143	351	1389	1740	0.0148893	0	0.0146791	0.0499407	0.0605444
18S_rRNA_M_Locati	616	U	860	3193	4053	0.0116702	0	0	1127	1239	2366	0.572502	0	0.364168	415	1262	1677	0.0163621	0	0	0.121389	0.171671
18S_rRNA_M_Locati	617	C	980	1996	2976	0.316799	0	0.240644	1115	1396	2511	0.405821	0	0.288754	658	752	1410	0.0695567	0	0.0650763	0.198158	0.0961308
18S_rRNA_M_Locati	618	C	600	3041	3641	0.00018305	0	0	730	1712	2442	0.390131	0	0.280726	591	634	1225	0.146665	0	0.127997	0.136241	0.114754
18S_rRNA_M_Locati	619	C	1523	2669	4192	0.190823	0	0	2727	2710	5437	0.460921	0	0	970	881	1851	0.312671	0	0	0	0
18S_rRNA_M_Locati	620	A	792	1992	2784	0.209001	0	0.172922	1092	1923	3015	0.03806	0	0.0366762	425	507	932	0.445707	0	0.308526	0.172708	0.110982
18S_rRNA_M_Locati	621	A	750	2038	2788	0.10651	0	0.0962886	887	2069	2956	0.0136249	0	0	224	430	654	1.01228	0.150893	0.503434	0.199907	0.218196
18S_rRNA_M_Locati	622	A	323	1420	1743	0.7582	0.16171	0.431377	454	1179	1633	0.84405	0.0801095	0.457867	69	369	438	2.12111	0.360714	0.680097	0.523114	0.11153
18S_rRNA_M_Locati	623	C	396	1486	1882	0.587903	0.100039	0.370363	740	1195	1935	0.558867	0.00393346	0.358627	99	472	571	1.51525	0.286586	0.602844	0.443945	0.112461
18S_rRNA_M_Locati	624	C	536	1642	2178	0.328249	0	0.247215	880	1283	2163	0.376581	0	0.273655	441	570	1011	0.443676	0.0325583	0.307534	0.276135	0.0246877
18S_rRNA_M_Locati	625	C	2030	2216	4246	0.368752	0	0	2841	2268	5109	0.462103	0	0	1368	987	2355	0.372411	0	0	0	0
18S_rRNA_M_Locati	626	A	1073	1297	2370	0.204461	0	0.169813	1230	1020	2250	0.312661	0	0.238269	963	673	1636	0.0383357	0	0.0369421	0.148341	0.083582
18S_rRNA_M_Locati	627	U	1307	2525	3832	0.277902	0	0	1729	1397	3126	0.0627367	0	0	984	1059	2043	0.0881768	0	0	0	0
18S_rRNA_M_Locati	628	G	827	1938	2765	0.0843657	0	0.0778278	1392	1152	2544	0.242179	0	0.195024	823	1319	2142	0.0412143	0	0	0.0909508	0.0801573
18S_rRNA_M_Locati	629	G	1213	1943	3156	0.0350403	0	0	2207	1083	3290	0.0207063	0	0	1290	1264	2554	0.170398	0	0	0	0
18S_rRNA_M_Locati	630	G	800	800	1600	1.03421	0.210631	0.508564	1092	1005	2097	0.626258	0.0506431	0.385204	901	664	1565	0.448843	0	0.309931	0.401233	0.08188
18S_rRNA_M_Locati	631	C	1477	2393	3870	0.226614	0	0	2405	2118	4523	0.297352	0	0	1983	1148	3131	0.327707	0	0	0	0
18S_rRNA_M_Locati	632	G	1270	1548	2818	0.0608135	0	0.0573464	1526	1128	2654	0.219443	0	0.180009	1743	1085	2828	0.273956	0	0	0.0791186	0.0750838
18S_rRNA_M_Locati	633	A	1672	2178	3850	0.241732	0	0	2293	1780	4073	0.243964	0	0	1746	1514	3260	0.388681	0	0	0	0
18S_rRNA_M_Locati	634	G	1727	2520	4247	0.345786	0	0	2927	2305	5232	0.455265	0	0	1271	1552	2823	0.307035	0	0	0	0
18S_rRNA_M_Locati	635	G	1209	1787	2996	0.0400957	0	0	2173	1260	3433	0.131926	0	0	670	563	1233	0.661129	0.0917173	0.398194	0.132731	0.18771
18S_rRNA_M_Locati	636	A	803	1276	2079	0.409087	0.0218063	0.290419	860	1147	2007	0.511161	0.0562779	0.338369	280	182	462	3.37492	0.516122	0.771806	0.466865	0.216513
18S_rRNA_M_Locati	637	C	911	1149	2060	0.438698	0.0723187	0.30503	1365	1238	2603	0.111982	0	0.100739	557	672	1229	0.544435	0.0220477	0.3527	0.252823	0.109286
18S_rRNA_M_Locati	638	C	926	854	1780	0.635149	0.138765	0.388568	738	884	1622	0.747162	0.154479	0.427794	504	502	1006	0.789407	0.0753745	0.441401	0.419254	0.0223981
18S_rRNA_M_Locati	639	C	2595	985	3580	0.251742	0	0	1484	905	2389	0.131702	0	0.116418	1677	671	2348	0.343167	0	0	0.0388059	0.0548799
18S_rRNA_M_Locati	640	A	1361	1070	2431	0.139378	0	0.122372	989	935	1924	0.402061	0.0379467	0.28687	978	721	1699	0.118928	0	0	0.136414	0.117534
18S_rRNA_M_Locati	641	U	1620	1075	2695	0.0617911	0	0	1332	1179	2511	0.0553477	0	0	1145	808	1953	0.325463	0	0	0	0
18S_rRNA_M_Locati	642	U	1774	1289	3063	0.219919	0	0	1428	1478	2906	0.233345	0	0	737	913	1650	0.213413	0	0	0	0
18S_rRNA_M_Locati	643	G	2186	839	3025	0.186693	0	0	1340	1163	2503	0.014235	0	0.0140407	1111	645	1756	0.232992	0	0	0.00468025	0.00661887
18S_rRNA_M_Locati	644	G	2107	489	2596	0.048295	0	0	1328	1187	2515	0.00945504	0	0.00937017	754	412	1166	0.193354	0	0.162142	0.0571708	0.0743246
18S_rRNA_M_Locati	645	A	1809	705	2514	0.00991385	0	0	1185	1645	2830	0.0933082	0	0	484	522	1006	0.4016	0	0.286733	0.0955776	0.135167
18S_rRNA_M_Locati	646	G	1993	1059	3052	0.257968	0	0	1667	1698	3365	0.265914	0	0	488	507	995	0.340852	0	0.254396	0.0847987	0.119924
18S_rRNA_M_Locati	647	G	49	27	76	32.0771	0.925346	0.970148	49	76	125	21.9567	0.864369	0.956771	16	20	36	37.9318	0.931692	0.974991	0.967303	0.00770572
18S_rRNA_M_Locati	648	G	648	711	1359	0.710139	0.0131858	0.415431	390	1077	1467	0.871806	0	0.465926	367	268	635	1.13159	0.170866	0.531258	0.470872	0.0474153
18S_rRNA_M_Locati	649	C	2537	1332	3869	0.496641	0	0	4060	2888	6948	0.70393	0	0	1395	1040	2435	0.535235	0	0	0	0
18S_rRNA_M_Locati	650	A	877	1050	1927	0.11167	0	0.100499	944	1009	1953	0.352417	0	0.260682	785	784	1569	0.193192	0	0	0.120394	0.107349
18S_rRNA_M_Locati	651	A	1060	1791	2851	0.308851	0	0	1187	1227	2414	0.0502277	0	0.0478444	730	1041	1771	0.279565	0	0	0.0159481	0.0225541
18S_rRNA_M_Locati	652	G	676	682	1358	0.582324	0	0.368189	716	907	1623	0.622037	0	0.383637	521	794	1315	0.0728639	0	0.0679635	0.273263	0.145306
18S_rRNA_M_Locati	653	U	1197	855	2052	0.0261135	0	0	1437	1368	2805	0.14585	0	0	588	1044	1632	0.13483	0	0	0	0
18S_rRNA_M_Locati	654	C	1058	661	1719	0.24615	0	0.197621	1186	1079	2265	0.131039	0	0.115902	491	704	1195	0.30013	0	0.230995	0.181506	0.0483484
18S_rRNA_M_Locati	655	U	801	753	1554	0.491361	0	0.329614	711	785	1496	0.852631	0.0289146	0.460393	325	397	722	1.39295	0.299928	0.582442	0.457483	0.103237
18S_rRNA_M_Locati	656	G	1479	1190	2669	0.174078	0	0	1171	1816	2987	0.185884	0	0	903	983	1886	0.145422	0	0	0	0
18S_rRNA_M_Locati	657	G	921	728	1649	0.435987	0	0.303743	696	1539	2235	0.152942	0	0.132705	634	786	1420	0.195629	0	0.163717	0.200055	0.0744036
18S_rRNA_M_Locati	658	U	1435	1447	2882	0.156303	0	0	953	2471	3424	0.231799	0	0	641	1651	2292	0.255459	0	0	0	0
18S_rRNA_M_Locati	659	G	825	819	1644	0.715887	0.0853891	0.417359	450	1105	1555	0.970815	0.181233	0.492757	401	1031	1432	0.309041	0	0.236208	0.382108	0.107661
18S_rRNA_M_Locati	660	C	1175	1020	2195	0.304711	0	0.233628	911	1667	2578	0.174198	0	0.148404	682	1033	1715	0.0780238	0	0.0724159	0.151482	0.0658506
18S_rRNA_M_Locati	661	C	2581	1814	4395	0.370506	0	0	2729	1581	4310	0.30715	0	0	1281	1556	2837	0.388392	0	0	0	0
18S_rRNA_M_Locati	662	A	2160	1318	3478	0.106103	0	0	1766	1421	3187	0.0894361	0	0.0821176	859	1346	2205	0.152826	0	0	0.0273725	0.0387106
18S_rRNA_M_Locati	663	G	1070	760	1830	0.874088	0.0996709	0.466543	1323	853	2176	0.710958	0.084113	0.415644	529	894	1423	0.339747	0	0.253724	0.378637	0.0907384
18S_rRNA_M_Locati	664	C	3866	1747	5613	0.417407	0	0	2874	2348	5222	0.293831	0	0	1441	1650	3091	0.445465	0	0	0	0
18S_rRNA_M_Locati	665	A	2405	1928	4333	0.182041	0	0	2163	2424	4587	0.140114	0	0	700	1047	1747	0.031331	0	0.0303961	0.010132	0.0143289
18S_rRNA_M_Locati	666	G	1157	927	2084	0.864844	0.116039	0.463881	1414	1332	2746	0.543648	0	0.352267	273	700	973	0.87099	0.142782	0.465779	0.427309	0.0530686
18S_rRNA_M_Locati	667	C	1410	1559	2969	0.240909	0	0.194192	2123	1617	3740	0.0781728	0	0.0725229	299	748	1047	0.609902	0	0.379069	0.215261	0.126031
18S_rRNA_M_Locati	668	C	1466	3263	4729	0.285464	0	0	2874	3990	6864	0.486086	0	0	507	1440	1947	0.241724	0	0	0	0
18S_rRNA_M_Locati	669	G	1934	1835	3769	0.098883	0	0	2347	1336	3683	0.017107	0	0.0168238	713	488	1201	0.250416	0	0.200399	0.0724077	0.0907641
18S_rRNA_M_Locati	670	C	3032	2631	5663	0.452378	0	0	3614	2744	6358	0.482873	0	0	990	1002	1992	0.307242	0	0	0	0
18S_rRNA_M_Locati	671	G	2002	2124	4126	0.282357	0	0	3165	1695	4860	0.356244	0	0	791	890	1681	0.235117	0	0	0	0
18S_rRNA_M_Locati	672	G	1306	1268	2574	0.117489	0	0.105173	781	800	1581	1.00883	0.129476	0.502355	395	522	917	0.421145	0	0.296569	0.301366	0.162185
18S_rRNA_M_Locati	673	U	21	53	74	40.8748	0.936471	0.97643	18	50	68	45.5729	0.937924	0.978833	10	133	143	8.90478	0.755956	0.899669	0.951644	0.0367648
18S_rRNA_M_Locati	674	A	1187	1451	2638	0.0307903	0	0.0298815	679	1055	1734	0.582651	0	0.368283	458	1099	1557	0.194915	0	0	0.132722	0.167013
18S_rRNA_M_Locati	675	A	946	1277	2223	0.139593	0	0.122542	619	922	1541	0.52545	0	0.344602	383	1194	1577	0.247282	0	0	0.155715	0.142625
18S_rRNA_M_Locati	676	U	661	1257	1918	0.269527	0	0.212392	492	1454	1946	0.084643	0	0.0780747	250	1139	1389	0.14757	0	0	0.0968223	0.0877163
18S_rRNA_M_Locati	677	U	750	960	1710	0.33434	0	0.250676	569	1743	2312	0.23538	0	0	215	826	1041	0.114097	0	0.1025	0.117725	0.102903
18S_rRNA_M_Locati	678	C	892	952	1844	0.201722	0	0.167937	852	1211	2063	0.229339	0	0	283	552	835	0.368394	0	0.269452	0.145796	0.111112
18S_rRNA_M_Locati	679	C	2643	1361	4004	0.456174	0	0	2294	1248	3542	0.5884	0	0	1185	724	1909	0.427661	0	0	0	0
18S_rRNA_M_Locati	680	A	1391	972	2363	0.0651485	0	0.0611881	174	869	1043	0.69735	0.0270196	0.411078	467	510	977	0.27746	0	0.21737	0.229879	0.143116
18S_rRNA_M_Locati	681	G	788	640	1428	0.842788	0.0497554	0.457518	69	452	521	2.37414	0.356388	0.704028	412	334	746	0.672304	0.0560085	0.402345	0.521297	0.131159
18S_rRNA_M_Locati	682	C	1174	962	2136	0.241923	0	0.19487	501	688	1189	0.417554	0	0.294734	465	464	929	0.327443	0	0.246872	0.245492	0.0407809
18S_rRNA_M_Locati	683	U	1099	1363	2462	0.0988632	0	0.0900018	579	618	1197	0.390799	0	0.281158	521	439	960	0.278737	0	0.218156	0.196439	0.0795357
18S_rRNA_M_Locati	684	C	1118	1497	2615	0.0121305	0	0.0119896	567	468	1035	0.516441	0	0.340778	643	334	977	0.222359	0	0.182062	0.178277	0.134254
18S_rRNA_M_Locati	685	C	4066	1635	5701	0.580845	0	0	2056	624	2680	0.48244	0	0	1717	657	2374	0.540384	0	0	0	0
18S_rRNA_M_Locati	686	A	1078	1032	2110	0.28722	0	0.223214	848	464	1312	0.0888297	0	0.0816398	697	476	1173	0.0159474	0	0.0157102	0.106855	0.0865692
18S_rRNA_M_Locati	687	A	1199	980	2179	0.292125	0	0.226162	866	429	1295	0.172685	0	0.147353	692	468	1160	0.0575749	0	0.0544849	0.142667	0.070165
18S_rRNA_M_Locati	688	U	1879	1486	3365	0.168842	0	0	1361	854	2215	0.323004	0	0	803	777	1580	0.228322	0	0	0	0
18S_rRNA_M_Locati	689	A	1161	1430	2591	0.173182	0	0.147666	1066	712	1778	0.0549747	0	0	287	711	998	0.345056	0	0.256728	0.134798	0.105203
18S_rRNA_M_Locati	690	G	74	50	124	25.9171	0.898066	0.963135	81	10	91	20.2655	0.871212	0.953463	62	34	96	14.2698	0.838833	0.935142	0.95058	0.0116083
18S_rRNA_M_Locati	691	C	1740	2042	3782	0.19926	0	0	1397	814	2211	0.162357	0	0	980	882	1862	0.295742	0	0	0	0
18S_rRNA_M_Locati	692	G	894	1612	2506	0.276027	0	0.216385	610	432	1042	1.18676	0.0866056	0.54294	635	471	1106	0.262752	0	0.208228	0.322518	0.155898
18S_rRNA_M_Locati	693	U	1840	2847	4687	0.344044	0	0	1210	1279	2489	0.0686613	0	0	1071	581	1652	0.181663	0	0	0	0
18S_rRNA_M_Locati	694	A	1285	2437	3722	0.129749	0	0	777	1192	1969	0.29617	0	0.228586	800	785	1585	0.135379	0	0	0.0761953	0.107756
18S_rRNA_M_Locati	695	U	1721	3294	5015	0.378905	0	0	1233	2283	3516	0.25318	0	0	803	1257	2060	0.359114	0	0	0	0
18S_rRNA_M_Locati	696	G	948	1659	2607	0.293767	0	0.227131	684	1555	2239	0.324454	0	0.245055	596	834	1430	0.0334731	0	0	0.157395	0.111535
18S_rRNA_M_Locati	697	C	1294	2081	3375	0.000727357	0	0.000727043	876	2140	3016	0.051184	0	0.0487071	621	734	1355	0.0401344	0	0.0386131	0.0293491	0.0206541
18S_rRNA_M_Locati	698	U	2076	2322	4398	0.267586	0	0	1895	4842	6737	0.566639	0	0	952	840	1792	0.272572	0	0	0	0
18S_rRNA_M_Locati	699	A	1349	1478	2827	0.184394	0	0.155733	1011	1906	2917	0.189334	0	0.159239	471	476	947	0.452473	0.0947315	0.311745	0.208906	0.0727326
18S_rRNA_M_Locati	700	A	1030	1015	2045	0.633513	0.126974	0.387938	777	1480	2257	0.590901	0.00959201	0.371529	562	410	972	0.390488	0.0406614	0.281036	0.346834	0.0470065
18S_rRNA_M_Locati	701	C	1842	1555	3397	0.0552155	0	0	1986	2728	4714	0.273208	0	0	842	624	1466	0.109066	0	0	0	0
18S_rRNA_M_Locati	702	G	1089	1099	2188	0.473829	0.0567678	0.321595	1177	1803	2980	0.1865	0	0.157229	438	374	812	0.632144	0.102383	0.387601	0.288808	0.0968642
18S_rRNA_M_Locati	703	U	1482	1227	2709	0.256761	0	0.204364	1797	1856	3653	0.0188986	0	0	493	400	893	0.543028	0.0603987	0.352179	0.185514	0.144393
18S_rRNA_M_Locati	704	U	2072	2012	4084	0.170369	0	0	2088	1986	4074	0.134146	0	0	632	742	1374	0.0279596	0	0.0272184	0.00907279	0.0128309
18S_rRNA_M_Locati	705	G	1296	1361	2657	0.339462	0	0.253503	1251	1170	2421	0.438737	0.00708552	0.305034	667	570	1237	0.194032	0	0.162611	0.240383	0.0588792
18S_rRNA_M_Locati	706	C	1896	1912	3808	0.0743356	0	0	1422	1866	3288	0.0277119	0	0.0269726	1214	544	1758	0.137806	0	0	0.00899088	0.012715
18S_rRNA_M_Locati	707	U	2711	1898	4609	0.206409	0	0	2327	1980	4307	0.216293	0	0	1623	425	2048	0.20968	0	0	0	0
18S_rRNA_M_Locati	708	G	1262	1097	2359	0.617872	0	0.382004	909	1006	1915	0.789643	0.0713252	0.441358	778	170	948	0.825618	0.0339258	0.452501	0.425288	0.0309424
18S_rRNA_M_Locati	709	C	5103	1484	6587	0.4904	0	0	3666	1510	5176	0.423999	0	0	1723	648	2371	0.313823	0	0	0	0
18S_rRNA_M_Locati	710	A	3080	1710	4790	0.260268	0	0	2318	1021	3339	0.0725316	0	0	1907	547	2454	0.324739	0	0	0	0
18S_rRNA_M_Locati	711	G	1841	988	2829	0.291252	0	0.22562	1691	652	2343	0.322478	0	0.243923	1317	469	1786	0.0313437	0	0	0.156514	0.110924
18S_rRNA_M_Locati	712	U	2117	1042	3159	0.129522	0	0.114702	1958	932	2890	0.0730274	0	0.0680793	1092	770	1862	0.0747838	0	0	0.060927	0.0470991
18S_rRNA_M_Locati	713	U	3787	1309	5096	0.374347	0	0	3372	1288	4660	0.399087	0	0	1529	1145	2674	0.40508	0	0	0	0
18S_rRNA_M_Locati	714	A	335	34	369	8.64895	0.756941	0.896613	430	51	481	5.56392	0.635981	0.84792	161	127	288	5.27067	0.667559	0.840991	0.861841	0.0247493
18S_rRNA_M_Locati	715	A	1695	977	2672	0.224355	0	0.183299	1701	561	2262	0.300928	0	0.231397	720	699	1419	0.162066	0	0.139548	0.184748	0.037511
18S_rRNA_M_Locati	716	A	2045	1111	3156	0.0133812	0	0	1911	826	2737	0.0361091	0	0.0348629	728	741	1469	0.0865457	0	0.0797021	0.0381883	0.0326231
18S_rRNA_M_Locati	717	A	1954	1305	3259	0.0707464	0	0	1841	1095	2936	0.0591685	0	0	740	746	1486	0.0304042	0	0.0295264	0.00984212	0.0139189
18S_rRNA_M_Locati	718	A	2099	1209	3308	0.0383902	0	0	2671	1874	4545	0.408061	0	0	638	1068	1706	0.132663	0	0	0	0
18S_rRNA_M_Locati	719	G	1835	683	2518	0.333329	0	0.250072	1567	662	2229	0.343473	0	0.255746	1033	616	1649	0.116754	0	0	0.168606	0.119245
18S_rRNA_M_Locati	720	C	2026	952	2978	0.0842938	0	0.0777648	2001	672	2673	0.0405967	0	0.0390269	730	859	1589	0.130657	0	0	0.0389306	0.0317474
18S_rRNA_M_Locati	721	U	1826	1234	3060	0.0861919	0	0.0793762	1587	591	2178	0.329713	0	0.248044	473	469	942	0.560693	0.122964	0.359503	0.228974	0.115154
18S_rRNA_M_Locati	722	C	2841	2095	4936	0.365508	0	0	2921	1107	4028	0.329359	0	0	646	1211	1857	0.28722	0	0	0	0
18S_rRNA_M_Locati	723	G	1476	1448	2924	0.147457	0	0.128546	1144	664	1808	0.646932	0.0414003	0.392942	668	707	1375	0.0472707	0	0	0.173829	0.163583
18S_rRNA_M_Locati	724	U	3476	1805	5281	0.427086	0	0	3001	1282	4283	0.379772	0	0	600	756	1356	0.0851797	0	0	0	0
18S_rRNA_M_Locati	725	A	1835	1999	3834	0.196778	0	0	1713	1656	3369	0.222529	0	0	443	931	1374	0.178626	0	0	0	0
18S_rRNA_M_Locati	726	G	878	1370	2248	0.415469	0.0324725	0.293612	654	512	1166	1.45111	0.278011	0.592228	714	381	1095	0.0164943	0	0	0.29528	0.241779
18S_rRNA_M_Locati	727	U	867	509	1376	1.33393	0.29706	0.571716	862	708	1570	0.761772	0.103847	0.432546	575	164	739	0.439054	0.0336825	0.305386	0.436549	0.108766
18S_rRNA_M_Locati	728	U	1300	1573	2873	0.0357612	0	0.0345381	1195	1834	3029	0.147613	0	0	642	346	988	0.0493989	0	0.047119	0.027219	0.0199203
18S_rRNA_M_Locati	729	G	653	2410	3063	0.0459675	0	0	829	2688	3517	0.300445	0	0	244	384	628	0.697085	0.100403	0.41114	0.137047	0.193813
18S_rRNA_M_Locati	730	G	774	1937	2711	0.105474	0	0.0954422	653	2033	2686	0.0386842	0	0	191	589	780	0.410613	0	0.291353	0.128932	0.121279
18S_rRNA_M_Locati	731	A	505	1714	2219	0.348058	0.0216655	0.258278	552	1689	2241	0.148558	0	0.129393	84	278	362	2.4011	0.442585	0.70655	0.364741	0.247357
18S_rRNA_M_Locati	732	U	625	1963	2588	0.158564	0	0.136908	658	1877	2535	0.0137224	0	0.0135419	42	847	889	0.390262	0.043682	0.280938	0.143796	0.109273
18S_rRNA_M_Locati	733	C	816	2282	3098	0.0223585	0	0	622	1522	2144	0.285206	0.0195388	0.221995	74	1220	1294	0.0238438	0	0	0.0739984	0.104649
18S_rRNA_M_Locati	734	U	973	1923	2896	0.0864036	0	0.079557	700	1372	2072	0.359613	0.0658928	0.26459	206	1368	1574	0.174765	0	0	0.114716	0.110843
18S_rRNA_M_Locati	735	C	1208	3573	4781	0.379325	0	0	1127	1790	2917	0.0708133	0	0	94	1784	1878	0.301691	0	0	0	0
18S_rRNA_M_Locati	736	G	1083	2491	3574	0.105094	0	0	612	2032	2644	0.0275278	0	0.0268002	64	2142	2206	0.40372	0	0	0.0089334	0.0126337
18S_rRNA_M_Locati	737	G	893	2599	3492	0.0704743	0	0	589	2728	3317	0.201179	0	0	179	2130	2309	0.431621	0	0	0	0
18S_rRNA_M_Locati	738	G	715	2866	3581	0.0970842	0	0	442	3213	3655	0.286573	0	0	263	1208	1471	0.0483092	0	0	0	0
18S_rRNA_M_Locati	739	G	712	1883	2595	0.264223	0	0.209064	355	3064	3419	0.249217	0	0	297	902	1199	0.147694	0	0.128781	0.112615	0.0861121
18S_rRNA_M_Locati	740	A	510	1665	2175	0.491136	0.0537275	0.329472	169	1979	2148	0.246668	0.0133037	0.197936	251	606	857	0.566602	0.131808	0.361945	0.296451	0.0709111
18S_rRNA_M_Locati	741	C	955	2114	3069	0.0143793	0	0.01418	499	1880	2379	0.11944	0	0.106736	392	609	1001	0.258028	0	0.205268	0.108728	0.0780241
18S_rRNA_M_Locati	742	C	889	3642	4531	0.392645	0	0	471	1968	2439	0.0349362	0	0.0337703	174	792	966	0.197104	0	0.164793	0.0661879	0.0710746
18S_rRNA_M_Locati	743	G	615	2714	3329	0.1367	0	0	510	1884	2394	0.0654326	0	0.0614382	155	877	1032	0.0194579	0	0.0191046	0.0268476	0.0256727
18S_rRNA_M_Locati	744	G	183	2235	2418	0.180148	0	0.152702	460	1604	2064	0.188512	0	0.158677	63	763	826	0.174043	0	0.148395	0.153258	0.00421578
18S_rRNA_M_Locati	745	G	733	1205	1938	0.460822	0.0219443	0.315565	502	1164	1666	0.465814	0.0247779	0.317915	248	587	835	0.136789	0	0.120456	0.251312	0.0925342
18S_rRNA_M_Locati	746	C	802	1394	2196	0.261109	0	0.207122	577	1763	2340	0.0116095	0	0	414	556	970	0.0383225	0	0	0.0690405	0.0976381
18S_rRNA_M_Locati	747	C	744	2312	3056	0.14857	0	0	558	2719	3277	0.342136	0	0	365	879	1244	0.27568	0	0	0	0
18S_rRNA_M_Locati	748	G	298	1394	1692	0.568642	0.0182002	0.362643	358	865	1223	0.964824	0.139385	0.491253	111	471	582	0.64534	0.130292	0.392632	0.415509	0.0549404
18S_rRNA_M_Locati	749	C	665	3428	4093	0.46211	0	0	544	3356	3900	0.478347	0	0	88	845	933	0.0426838	0	0	0	0
18S_rRNA_M_Locati	750	G	659	1246	1905	0.22913	0	0.186496	478	752	1230	0.846033	0.0604075	0.4585	167	437	604	0.519798	0.0508124	0.34239	0.329129	0.11144
18S_rRNA_M_Locati	751	C	701	2071	2772	0.238915	0	0	618	2209	2827	0.303949	0	0	134	1129	1263	0.34753	0	0	0	0
18S_rRNA_M_Locati	752	G	792	1606	2398	0.152003	0	0	558	1668	2226	0.132849	0	0	432	750	1182	0.314023	0	0	0	0
18S_rRNA_M_Locati	753	G	478	881	1359	0.489134	0.0202907	0.328631	347	750	1097	0.743281	0	0.426592	505	343	848	0.043633	0	0	0.251741	0.182445
18S_rRNA_M_Locati	754	U	550	1120	1670	0.0747789	0	0.0696148	389	2279	2668	0.432238	0	0	530	141	671	0.159342	0	0.137618	0.0690777	0.0561837
18S_rRNA_M_Locati	755	C	431	1304	1735	0.000339222	0	0.000339302	367	1105	1472	0.0701441	0	0.065588	405	159	564	0.397522	0.0371486	0.284809	0.116912	0.121672
18S_rRNA_M_Locati	756	C	626	1131	1757	0.124561	0	0	527	858	1385	0.0258698	0	0	723	93	816	0.106746	0	0	0	0
18S_rRNA_M_Locati	757	G	413	370	783	1.03118	0.209729	0.507994	282	215	497	1.74076	0.31606	0.635604	501	34	535	0.413599	0.0596604	0.292972	0.478857	0.141388
18S_rRNA_M_Locati	758	C	403	544	947	0.575973	0.078323	0.365716	426	337	763	0.540111	0	0.350994	534	81	615	0.195274	0	0.163594	0.293435	0.0920078
18S_rRNA_M_Locati	759	C	589	690	1279	0.0762153	0	0.0708693	476	434	910	0.136602	0	0.120301	473	122	595	0.211838	0	0.17505	0.122073	0.0425499
18S_rRNA_M_Locati	760	G	400	423	823	0.747155	0.126118	0.427938	288	229	517	1.00124	0.0734811	0.500794	476	110	586	0.286352	0.0267192	0.222903	0.383878	0.117648
18S_rRNA_M_Locati	761	C	1291	850	2141	0.420422	0	0	736	634	1370	0.410066	0	0	732	162	894	0.175357	0	0	0	0
18S_rRNA_M_Locati	762	G	806	601	1407	0.0780934	0	0	495	358	853	0.0428181	0	0	423	206	629	0.24067	0	0.194233	0.0647442	0.0915621
18S_rRNA_M_Locati	763	A	689	897	1586	0.23724	0	0	500	395	895	0.153807	0	0	535	251	786	0.0477622	0	0	0	0
18S_rRNA_M_Locati	764	G	824	841	1665	0.0125383	0	0	464	367	831	0.0210203	0	0.0206118	813	343	1156	0.28064	0	0	0.0068706	0.0097165
18S_rRNA_M_Locati	765	G	476	426	902	1.18862	0	0.543366	262	247	509	1.05488	0	0.513844	666	100	766	0.201738	0	0.168054	0.408421	0.170392
18S_rRNA_M_Locati	766	C	800	603	1403	0.417949	0	0.294904	447	351	798	0.338896	0	0.253353	1150	65	1215	0.282209	0	0	0.182752	0.130334
18S_rRNA_M_Locati	767	G	390	256	646	2.35224	0.0487988	0.702016	257	244	501	1.29754	0.00334454	0.565243	648	47	695	0.325255	0	0.245695	0.504318	0.191209
18S_rRNA_M_Locati	768	A	517	646	1163	0.842182	0	0.457379	250	451	701	0.656537	0	0.396672	398	126	524	0.742243	0	0.426494	0.426848	0.0247847
18S_rRNA_M_Locati	769	G	282	296	578	2.94302	0	0.746715	197	349	546	1.24554	0	0.555125	188	136	324	1.82574	0.00206474	0.646815	0.649552	0.0782401
18S_rRNA_M_Locati	770	C	6244	2901	9145	0.851536	0	0	1506	778	2284	0.473431	0	0	1669	1057	2726	0.777163	0	0	0	0
18S_rRNA_M_Locati	771	C	3575	668	4243	0.55777	0	0	3219	416	3635	0.691242	0	0	766	280	1046	0.30624	0	0	0	0
18S_rRNA_M_Locati	772	A	588	323	911	1.38487	0	0.580957	967	273	1240	0.155744	0	0.13485	245	115	360	1.03632	0	0.509611	0.408473	0.19566
18S_rRNA_M_Locati	773	C	533	314	847	1.41312	0	0.585884	272	366	638	1.32923	0	0.571057	158	130	288	1.28551	0	0.563313	0.573418	0.00936475
18S_rRNA_M_Locati	774	C	501	479	980	0.987768	0	0.497178	447	603	1050	0.389893	0	0.280712	114	261	375	0.634634	0	0.388875	0.388922	0.0883717
18S_rRNA_M_Locati	775	G	332	417	749	1.49016	0	0.59874	230	428	658	1.28528	0	0.562791	94	166	260	1.31511	0	0.568997	0.576843	0.0156899
18S_rRNA_M_Locati	776	C	1330	347	1677	0.00123162	0	0.00123084	2550	593	3143	0.615928	0	0	187	216	403	0.453108	0	0.312352	0.104528	0.146955
18S_rRNA_M_Locati	777	C	504	604	1108	0.173139	0	0.1477	722	626	1348	0.0199489	0	0	74	226	300	0.697674	0.00787356	0.411765	0.186488	0.170325
18S_rRNA_M_Locati	778	G	434	686	1120	0.0236892	0	0.0231612	231	696	927	0.301329	0	0.231747	102	221	323	0.616152	0.130733	0.381976	0.212295	0.14713
18S_rRNA_M_Locati	779	G	423	564	987	0.201192	0	0.167635	215	461	676	0.762482	0	0.432981	177	282	459	0.202126	0	0.168445	0.256354	0.124895
18S_rRNA_M_Locati	780	U	493	765	1258	0.0698967	0	0	558	601	1159	0.0386303	0	0	230	460	690	0.173179	0	0	0	0
18S_rRNA_M_Locati	781	C	423	710	1133	0.058593	0	0.055396	296	653	949	0.150456	0	0.130899	193	428	621	0.0140943	0	0.0139205	0.0667386	0.0484252
18S_rRNA_M_Locati	782	C	559	603	1162	0.0494793	0	0.0471852	398	503	901	0.176595	0	0.150232	308	473	781	0.158411	0	0	0.0658056	0.0627292
18S_rRNA_M_Locati	783	C	781	817	1598	0.286214	0	0	554	724	1278	0.322865	0	0	258	784	1042	0.359753	0	0	0	0
18S_rRNA_M_Locati	784	G	627	683	1310	0.104687	0	0	401	685	1086	0.226658	0	0	309	629	938	0.225618	0	0	0	0
18S_rRNA_M_Locati	785	G	373	758	1131	0.111504	0	0.100398	200	571	771	0.262464	0	0.208112	154	517	671	0.262302	0	0.208042	0.172184	0.0507603
18S_rRNA_M_Locati	786	A	263	702	965	0.369255	0.0357034	0.26988	145	483	628	0.621551	0	0.383683	115	487	602	0.537166	0.0526525	0.34983	0.334464	0.0477134
18S_rRNA_M_Locati	787	C	346	809	1155	0.179085	0	0.151996	204	443	647	0.596279	0	0.373905	194	655	849	0.126575	0	0.112471	0.212791	0.115062
18S_rRNA_M_Locati	788	C	333	834	1167	0.190183	0	0.159908	164	397	561	0.871313	0	0.466059	233	454	687	0.463582	0.0292509	0.31706	0.314342	0.125
18S_rRNA_M_Locati	789	C	376	723	1099	0.344253	0.0281486	0.256265	231	425	656	0.681177	0	0.405546	274	554	828	0.237033	0	0.191801	0.284537	0.0895217
18S_rRNA_M_Locati	790	C	467	677	1144	0.3328	0.0506122	0.249863	281	495	776	0.418604	0	0.29535	355	653	1008	0.00525273	0	0.00523044	0.183481	0.127403
18S_rRNA_M_Locati	791	C	1619	785	2404	0.396489	0	0	2104	944	3048	0.719682	0	0	708	1185	1893	0.517107	0	0	0	0
18S_rRNA_M_Locati	792	A	781	933	1714	0.0639974	0	0	456	687	1143	0.0316919	0	0	287	1211	1498	0.361107	0	0	0	0
18S_rRNA_M_Locati	793	G	602	1523	2125	0.238314	0	0	255	962	1217	0.0852399	0	0	455	909	1364	0.293228	0	0	0	0
18S_rRNA_M_Locati	794	G	239	942	1181	0.521818	0.0868523	0.343082	152	501	653	0.86964	0	0.465518	238	436	674	0.541531	0.0114512	0.351632	0.386744	0.055811
18S_rRNA_M_Locati	795	C	488	1650	2138	0.18785	0	0	324	1233	1557	0.272957	0	0	368	562	930	0.0798544	0	0.0740229	0.0246743	0.0348947
18S_rRNA_M_Locati	796	C	383	1391	1774	0.0189484	0	0.0186063	272	420	692	0.757399	0	0.431332	233	445	678	0.471281	0.0143259	0.320641	0.25686	0.174426
18S_rRNA_M_Locati	797	U	283	1521	1804	0.0478055	0	0.0456485	229	545	774	0.572674	0	0.364439	181	431	612	0.599547	0.055144	0.375206	0.261764	0.15288
18S_rRNA_M_Locati	798	C	362	1459	1821	0.00398219	0	0.00396857	277	914	1191	0.12459	0	0	182	418	600	0.491921	0	0.330091	0.111353	0.15468
18S_rRNA_M_Locati	799	C	477	1214	1691	0.0748293	0	0.069658	251	805	1056	0.0175339	0	0	520	295	815	0.00102124	0	0.00102145	0.0235598	0.032599
18S_rRNA_M_Locati	800	C	843	1314	2157	0.211616	0	0	464	1192	1656	0.435962	0	0	694	595	1289	0.446107	0	0	0	0
18S_rRNA_M_Locati	801	G	696	1124	1820	0.0650558	0	0	391	652	1043	0.0522031	0	0	781	304	1085	0.345069	0	0	0	0
18S_rRNA_M_Locati	802	G	542	970	1512	0.0825512	0	0.0763028	261	421	682	0.459899	0	0.315337	450	167	617	0.159799	0	0.137974	0.176538	0.101324
18S_rRNA_M_Locati	803	C	828	1976	2804	0.483597	0	0	513	842	1355	0.225877	0	0	538	396	934	0.310184	0	0	0	0
18S_rRNA_M_Locati	804	G	477	634	1111	0.428517	0.0350429	0.300162	303	317	620	0.92063	0.0183258	0.47974	296	144	440	0.506097	0.0719931	0.336539	0.372147	0.0775154
18S_rRNA_M_Locati	805	C	428	758	1186	0.273528	0	0.214922	319	371	690	0.6991	0	0.411804	247	223	470	0.318542	0.00467337	0.241976	0.289567	0.087137
18S_rRNA_M_Locati	806	C	313	690	1003	0.452302	0.00522989	0.311652	296	347	643	0.808696	0	0.4475	193	267	460	0.245216	0	0.19727	0.318807	0.102281
18S_rRNA_M_Locati	807	C	274	577	851	0.59507	0	0.373343	278	393	671	0.661045	0	0.398326	102	248	350	0.472586	0.048282	0.321545	0.364405	0.0319768
18S_rRNA_M_Locati	808	C	293	524	817	0.635833	0	0.388981	301	949	1250	0.147082	0	0	89	272	361	0.337385	0	0.252794	0.213925	0.161162
18S_rRNA_M_Locati	809	C	744	1070	1814	0.358739	0	0	475	2879	3354	0.758407	0	0	186	298	484	0.0743184	0	0	0	0
18S_rRNA_M_Locati	810	C	766	838	1604	0.335355	0	0	504	1178	1682	0.450657	0	0	115	311	426	0.001223	0	0	0	0
18S_rRNA_M_Locati	811	G	560	807	1367	0.237378	0	0	273	361	634	0.530289	0	0.346886	70	345	415	0.0137553	0	0.013601	0.120162	0.160414
18S_rRNA_M_Locati	812	G	293	658	951	0.0839169	0	0.0774951	169	179	348	1.65126	0	0.623494	220	195	415	0.00296474	0	0.00296308	0.234651	0.276632
18S_rRNA_M_Locati	813	A	214	231	445	1.39312	0.178432	0.582682	119	143	262	2.31534	0.0445183	0.699173	148	181	329	0.296061	0.0075522	0.228966	0.503607	0.199939
18S_rRNA_M_Locati	814	U	884	779	1663	0.430455	0	0	537	320	857	0.117457	0	0	208	480	688	0.365473	0	0	0	0
18S_rRNA_M_Locati	815	G	368	187	555	0.923201	0.0990569	0.480483	172	141	313	1.33146	0	0.571865	93	213	306	0.599819	0	0.375694	0.476014	0.0801487
18S_rRNA_M_Locati	816	C	219	414	633	0.553926	0	0.356831	141	214	355	0.55515	0	0.357621	112	287	399	0.219306	0	0.180231	0.298227	0.083437
18S_rRNA_M_Locati	817	C	207	292	499	0.911	0.0442953	0.477213	154	114	268	0.832838	0.054111	0.455321	151	179	330	0.526519	0	0.345599	0.426044	0.0575815
18S_rRNA_M_Locati	818	C	285	323	608	0.536471	0	0.349532	227	164	391	0.217262	0	0.178859	184	211	395	0.293042	0	0.227073	0.251821	0.0718408
18S_rRNA_M_Locati	819	U	306	822	1128	0.23291	0	0	188	404	592	0.21409	0	0	152	308	460	0.120728	0	0.107932	0.0359772	0.0508795
18S_rRNA_M_Locati	820	U	481	1279	1760	0.548987	0	0	323	543	866	0.49481	0	0	141	1140	1281	0.665471	0	0	0	0
18S_rRNA_M_Locati	821	G	620	480	1100	0.2725	0	0	246	225	471	0.0197976	0	0	50	359	409	0.235366	0	0.1909	0.0636334	0.0899912
18S_rRNA_M_Locati	822	A	474	169	643	0.286473	0	0.22295	247	218	465	0.00882213	0	0.00876362	94	394	488	0.0121336	0	0	0.077238	0.103096
18S_rRNA_M_Locati	823	C	411	339	750	0.0333925	0	0.0323552	137	206	343	0.418831	0.0133495	0.2958	48	380	428	0.0927998	0	0.0851008	0.137752	0.113813
18S_rRNA_M_Locati	824	U	321	681	1002	0.282863	0	0	142	332	474	0.0423392	0	0.0407016	22	459	481	0.0752882	0	0	0.0135672	0.0191869
18S_rRNA_M_Locati	825	G	56	389	445	0.680468	0.105001	0.405469	36	401	437	0.153247	0	0.133147	5	416	421	0.00471301	0	0	0.179539	0.168751
18S_rRNA_M_Locati	826	G	16	404	420	0.621774	0.0457541	0.383953	10	294	304	0.708525	0.145244	0.415497	3	366	369	0.0360961	0	0.0349297	0.278127	0.172448
18S_rRNA_M_Locati	827	G	115	382	497	0.19759	0	0.165267	156	334	490	0.0358	0	0.0346307	14	268	282	0.119121	0	0.106778	0.102225	0.0534291
18S_rRNA_M_Locati	828	U	63	376	439	0.430758	0	0.301549	62	458	520	0.11962	0	0.107024	7	212	219	0.406364	0.0138224	0.289883	0.232818	0.0890778
18S_rRNA_M_Locati	829	G	150	212	362	0.831038	0.0406764	0.454545	181	326	507	0.30175	0	0.232154	40	203	243	0.179827	0	0.152949	0.279883	0.127668
18S_rRNA_M_Locati	830	U	263	333	596	0.128662	0	0.114164	246	516	762	0.08203	0	0	29	291	320	0.133853	0	0	0.0380548	0.0538176
18S_rRNA_M_Locati	831	C	352	299	651	1.35431	0.326009	0.575622	350	178	528	0.756396	0	0.431116	32	107	139	3.06159	0.55984	0.755119	0.587286	0.13253
18S_rRNA_M_Locati	832	C	344	75	419	4.29521	0.208573	0.811515	467	109	576	0.958078	0.0555214	0.489729	38	35	73	8.45255	0.620715	0.895489	0.732244	0.174878
18S_rRNA_M_Locati	833	U	393	261	654	3.25644	0	0.765336	584	288	872	1.04106	0	0.510345	45	109	154	4.3253	0	0.813203	0.696294	0.132931
18S_rRNA_M_Locati	834	C	1160	536	1696	0.789969	0	0.441477	1059	573	1632	0.187746	0	0.158151	147	256	403	1.29939	0	0.565712	0.388446	0.170559
18S_rRNA_M_Locati	835	G	747	194	941	2.67019	0	0.727745	922	456	1378	0.575199	0	0.365328	182	145	327	2.22764	0	0.690829	0.594634	0.162843
18S_rRNA_M_Locati	836	G	806	265	1071	2.5397	0	0.717679	734	271	1005	1.39053	0	0.581926	427	113	540	1.13754	0	0.532634	0.610746	0.0782449
18S_rRNA_M_Locati	837	C	13518	2572	16090	0.858909	0	0	2827	655	3482	0.352251	0	0	4573	784	5357	0.87412	0	0	0	0
18S_rRNA_M_Locati	838	U	8467	288	8755	0.642928	0	0	2832	156	2988	0.191826	0	0	1457	118	1575	0.272702	0	0	0	0
18S_rRNA_M_Locati	839	U	5407	433	5840	0.439727	0	0	10988	109	11097	0.866748	0	0	1184	214	1398	0.165412	0	0	0	0
18S_rRNA_M_Locati	840	G	546	482	1028	2.45686	0	0.71092	1306	132	1438	0.799637	0	0.444504	779	224	1003	0.220164	0	0.180585	0.445337	0.216509
18S_rRNA_M_Locati	841	G	205	259	464	6.00241	0	0.857455	750	96	846	1.92163	0	0.657991	527	86	613	1.0051	0	0.50168	0.672376	0.1456
18S_rRNA_M_Locati	842	G	895	165	1060	1.69083	0	0.628587	725	128	853	1.68022	0	0.627171	618	39	657	0.767275	0	0.434531	0.56343	0.0911471
18S_rRNA_M_Locati	843	G	500	140	640	3.03183	0	0.752264	370	221	591	2.69197	0	0.729475	445	4	449	1.48837	0	0.598665	0.693468	0.0676785
18S_rRNA_M_Locati	844	C	442	101	543	1.96759	0	0.663437	514	25	539	2.60488	0.125743	0.722969	533	9	542	0.49734	0	0.332558	0.572988	0.171738
18S_rRNA_M_Locati	845	C	390	171	561	1.10654	0	0.525733	719	33	752	1.42442	0.175677	0.587852	795	12	807	0.131477	0	0	0.371195	0.263697
18S_rRNA_M_Locati	846	C	925	284	1209	0.254628	0	0	2843	87	2930	0.631681	0	0	1416	9	1425	0.60981	0	0	0	0
18S_rRNA_M_Locati	847	G	765	122	887	0.0330831	0	0.0320586	1117	117	1234	0.00121457	0	0	783	13	796	0.30191	0	0	0.0106862	0.0151126
18S_rRNA_M_Locati	848	G	591	110	701	0.459022	0	0.314917	787	55	842	0.58276	0	0.368468	338	19	357	0.571633	0	0.364367	0.349251	0.0243354
18S_rRNA_M_Locati	849	A	859	157	1016	0.0546378	0	0.0518555	1249	84	1333	0.00797101	0	0.00791387	533	19	552	0.0916416	0	0	0.0199231	0.0228096
18S_rRNA_M_Locati	850	G	924	66	990	0.213387	0	0.176007	1015	87	1102	0.314163	0	0.239225	268	16	284	0.878207	0	0.468452	0.294561	0.125639
18S_rRNA_M_Locati	851	C	1402	486	1888	0.324728	0	0	2451	261	2712	0.498403	0	0	195	48	243	1.41639	0	0.587156	0.195719	0.276788
18S_rRNA_M_Locati	852	G	1141	570	1711	0.0901739	0	0	1190	243	1433	0.144073	0	0.126006	179	45	224	2.03156	0	0.67112	0.265709	0.291248
18S_rRNA_M_Locati	853	U	30	25	55	36.3466	0.914267	0.973689	30	19	49	36.3007	0.923378	0.973713	8	18	26	29.2514	0.872809	0.968129	0.971844	0.00262675
18S_rRNA_M_Locati	854	U	1015	671	1686	0.466673	0	0.318314	1237	446	1683	0.148073	0	0.129042	218	140	358	1.63067	0.228545	0.620526	0.355961	0.202406
18S_rRNA_M_Locati	855	U	1612	450	2062	0.415075	0	0.293424	1428	407	1835	0.157534	0	0.136159	307	231	538	0.969491	0.111172	0.492719	0.307434	0.145902
18S_rRNA_M_Locati	856	A	1695	531	2226	0.522097	0.00756928	0.343113	1149	585	1734	0.343369	0	0.255712	541	473	1014	0.133552	0	0.11792	0.238915	0.0926988
18S_rRNA_M_Locati	857	C	2301	681	2982	0.2902	0	0.224985	1501	733	2234	0.114616	0	0.102871	1263	530	1793	0.317899	0	0	0.109285	0.0919616
18S_rRNA_M_Locati	858	U	3468	974	4442	0.0588066	0	0	2121	1090	3211	0.216542	0	0	1741	630	2371	0.44799	0	0	0	0
18S_rRNA_M_Locati	859	U	4136	1786	5922	0.242364	0	0	2367	1140	3507	0.237875	0	0	1938	747	2685	0.477823	0	0	0	0
18S_rRNA_M_Locati	860	U	5288	3487	8775	0.47097	0	0	2823	1889	4712	0.411689	0	0	1574	835	2409	0.360161	0	0	0	0
18S_rRNA_M_Locati	861	G	3643	2083	5726	0.0926489	0	0	1665	1181	2846	0.0779534	0	0.0723397	771	266	1037	0.678013	0.0638517	0.404289	0.158876	0.176028
18S_rRNA_M_Locati	862	A	3568	1940	5508	0.0407354	0	0	1454	1470	2924	0.0385413	0	0.0371232	712	562	1274	0.337996	0	0.252762	0.0966283	0.111438
18S_rRNA_M_Locati	863	A	3537	2632	6169	0.128111	0	0	1558	1534	3092	0.00964184	0	0	671	810	1481	0.123474	0	0.10997	0.0366567	0.0518404
18S_rRNA_M_Locati	864	A	3269	2662	5931	0.0962126	0	0	1448	1604	3052	0.00270772	0	0.00270129	502	1094	1596	0.00292215	0	0	0.00090043	0.0012734
18S_rRNA_M_Locati	865	A	3214	2341	5555	0.0708663	0	0	1480	1554	3034	0.0241406	0	0	624	1092	1716	0.140691	0	0	0	0
18S_rRNA_M_Locati	866	A	3594	1864	5458	0.107403	0	0	1750	1644	3394	0.15585	0	0	756	1022	1778	0.22482	0	0	0	0
18S_rRNA_M_Locati	867	A	2254	1102	3356	0.367971	0.043689	0.269049	1157	1531	2688	0.0330771	0	0.0320296	642	679	1321	0.0238696	0	0.0233303	0.108136	0.113838
18S_rRNA_M_Locati	868	U	1706	1083	2789	0.558236	0.0526889	0.358331	726	731	1457	1.04252	0.266323	0.510581	537	306	843	0.677475	0.18879	0.404151	0.424355	0.0637764
18S_rRNA_M_Locati	869	U	4217	1992	6209	0.427221	0	0	2079	1026	3105	0.139572	0	0	813	486	1299	0.0109915	0	0.0108802	0.00362674	0.00512899
18S_rRNA_M_Locati	870	A	1470	2108	3578	0.04939	0	0	994	1830	2824	0.0909459	0	0	315	964	1279	0.0258594	0	0	0	0
18S_rRNA_M_Locati	871	G	289	1961	2250	0.387388	0	0.279311	514	1592	2106	0.203686	0	0.169285	121	859	980	0.244195	0	0.196429	0.215008	0.0467995
18S_rRNA_M_Locati	872	A	235	3066	3301	0.196013	0	0	905	2486	3391	0.299885	0	0	164	1325	1489	0.229858	0	0	0	0
18S_rRNA_M_Locati	873	G	435	1241	1676	0.46393	0	0.317037	627	1503	2130	0.119991	0	0.10718	567	712	1279	0.122925	0	0	0.141406	0.131673
18S_rRNA_M_Locati	874	U	634	1873	2507	0.164483	0	0	920	3453	4373	0.53783	0	0	779	726	1505	0.282537	0	0	0	0
18S_rRNA_M_Locati	875	G	273	477	750	1.72338	0.217373	0.633118	245	563	808	1.92198	0.309771	0.658044	452	179	631	0.829061	0.151409	0.453664	0.581609	0.0910412
18S_rRNA_M_Locati	876	U	195	448	643	1.6055	0.217774	0.616565	240	574	814	1.67628	0.18802	0.626634	356	146	502	1.23786	0.209488	0.553637	0.598945	0.0323005
18S_rRNA_M_Locati	877	U	337	810	1147	0.312524	0	0.238267	419	1055	1474	0.437009	0	0.304254	578	256	834	0.339375	0	0.25361	0.265377	0.0281946
18S_rRNA_M_Locati	878	C	1198	964	2162	0.341218	0	0	1302	2171	3473	0.461447	0	0	1243	530	1773	0.421051	0	0	0	0
18S_rRNA_M_Locati	879	A	244	563	807	0.950096	0	0.487514	382	952	1334	0.557162	0	0.357978	497	509	1006	0.130178	0	0.115285	0.320259	0.154285
18S_rRNA_M_Locati	880	A	307	763	1070	0.531497	0	0.347256	462	1135	1597	0.285996	0	0.222501	763	480	1243	0.0876384	0	0	0.189919	0.143626
18S_rRNA_M_Locati	881	G	212	396	608	1.8395	0.275187	0.6482	313	1149	1462	0.329657	0	0.248054	217	430	647	0.831567	0.0480906	0.454402	0.450219	0.163386
18S_rRNA_M_Locati	882	G	169	718	887	1.08858	0.184693	0.521486	240	685	925	1.27526	0.137018	0.560756	279	422	701	0.71817	0.0132873	0.418332	0.500191	0.0600621
18S_rRNA_M_Locati	883	C	784	1711	2495	0.250984	0	0	2173	1666	3839	0.477645	0	0	809	1106	1915	0.424623	0	0	0	0
18S_rRNA_M_Locati	884	A	293	3116	3409	0.433864	0	0	378	1722	2100	0.0799989	0	0.0741058	297	896	1193	0.0044947	0	0	0.0247019	0.0349338
18S_rRNA_M_Locati	885	G	256	2699	2955	0.305969	0	0	311	2479	2790	0.24784	0	0	436	1328	1764	0.406723	0	0	0	0
18S_rRNA_M_Locati	886	G	210	2525	2735	0.377335	0	0.274033	104	2089	2193	0.110184	0	0.0992895	324	1178	1502	0.174178	0	0	0.124441	0.113278
18S_rRNA_M_Locati	887	G	185	1606	1791	1.44898	0.0658997	0.591802	52	1287	1339	0.950423	0	0.487477	262	519	781	0.664393	0	0.399487	0.492922	0.0786065
18S_rRNA_M_Locati	888	C	191	1863	2054	1.35144	0.0177962	0.574847	164	1765	1929	0.385746	0	0.278471	433	294	727	0.825214	0	0.452459	0.435259	0.121605
18S_rRNA_M_Locati	889	C	261	2436	2697	0.916518	0	0.478313	168	4453	4621	0.44318	0	0	440	530	970	0.382801	0	0.277037	0.251783	0.196085
18S_rRNA_M_Locati	890	G	148	2585	2733	0.983683	0	0.495979	194	1724	1918	0.44584	0	0.308472	174	693	867	0.511777	0	0.338785	0.381078	0.0821838
18S_rRNA_M_Locati	891	G	102	2102	2204	1.60559	0.0870771	0.616317	116	1112	1228	1.38546	0.0948116	0.580992	56	445	501	1.74154	0	0.635704	0.611004	0.0226497
18S_rRNA_M_Locati	892	C	5246	25422	30668	0.918737	0	0	1219	4755	5974	0.612201	0	0	1060	3286	4346	0.796388	0	0	0	0
18S_rRNA_M_Locati	893	A	3466	879	4345	0.223892	0	0.182969	1626	553	2179	0.255627	0	0.203659	279	370	649	0.93935	0	0.484748	0.290459	0.137643
18S_rRNA_M_Locati	894	C	2229	857	3086	0.64209	0	0.391097	2276	648	2924	0.104821	0	0	585	392	977	0.206964	0	0.17162	0.187573	0.160063
18S_rRNA_M_Locati	895	C	1131	1206	2337	1.01561	0	0.50398	3369	732	4101	0.422935	0	0	794	607	1401	0.212696	0	0	0.167993	0.237578
18S_rRNA_M_Locati	896	G	637	538	1175	2.79455	0.231359	0.736629	437	402	839	2.13485	0.213641	0.681265	509	270	779	0.590783	0	0.371678	0.596524	0.160588
18S_rRNA_M_Locati	897	C	1253	1017	2270	0.718245	0	0.418118	2153	767	2920	0.20329	0	0	538	594	1132	0.123958	0	0.110374	0.176164	0.176922
18S_rRNA_M_Locati	898	G	608	479	1087	2.33219	0.31823	0.70009	524	502	1026	1.44405	0.150491	0.591079	338	257	595	1.38162	0	0.580526	0.623899	0.0540475
18S_rRNA_M_Locati	899	C	740	536	1276	0.541469	0	0.351447	1042	969	2011	0.101916	0	0.0925318	298	361	659	1.09197	0.129971	0.52236	0.322113	0.176698
18S_rRNA_M_Locati	900	C	663	554	1217	0.474932	0	0.322182	720	924	1644	0.347275	0	0.257877	318	245	563	1.70762	0.31167	0.631086	0.403715	0.162905
18S_rRNA_M_Locati	901	C	780	481	1261	0.364941	0	0.267523	511	745	1256	0.751224	0	0.429166	676	241	917	0.780961	0.156456	0.438774	0.378488	0.0785618
18S_rRNA_M_Locati	902	C	2541	515	3056	0.519136	0	0	2966	995	3961	0.55309	0	0	2296	591	2887	0.473434	0	0	0	0
18S_rRNA_M_Locati	903	A	1419	368	1787	0.0634228	0	0	1180	692	1872	0.137332	0	0.120806	1923	688	2611	0.347048	0	0	0.0402686	0.0569484
18S_rRNA_M_Locati	904	U	1168	292	1460	0.120116	0	0.107301	1223	563	1786	0.137667	0	0.121068	1625	533	2158	0.166255	0	0	0.0761228	0.0541196
18S_rRNA_M_Locati	905	U	1667	440	2107	0.268664	0	0	2289	870	3159	0.415081	0	0	2123	814	2937	0.41245	0	0	0	0
18S_rRNA_M_Locati	906	G	884	304	1188	0.361116	0	0.265473	1021	365	1386	0.412689	0	0.292279	1209	558	1767	0.0431875	0	0.041422	0.199725	0.112471
18S_rRNA_M_Locati	907	A	1244	309	1553	0.0116474	0	0	1111	514	1625	0.132397	0	0.116981	1468	599	2067	0.140812	0	0	0.0389937	0.0551454
18S_rRNA_M_Locati	908	A	845	322	1167	0.404937	0	0.2884	993	489	1482	0.301176	0	0.231585	1133	590	1723	0.0703081	0	0.0657252	0.195237	0.0944702
18S_rRNA_M_Locati	909	U	1745	502	2247	0.34227	0	0	2098	919	3017	0.462252	0	0	1210	986	2196	0.226865	0	0	0	0
18S_rRNA_M_Locati	910	A	599	258	857	0.912924	0.122059	0.477531	504	340	844	1.15119	0.0825575	0.535436	417	497	914	0.88595	0.128396	0.470036	0.494334	0.0292238
18S_rRNA_M_Locati	911	C	761	230	991	0.709375	0.0728519	0.415236	651	275	926	0.956466	0.0267548	0.489144	416	202	618	1.74597	0.282302	0.636204	0.513528	0.091843
18S_rRNA_M_Locati	912	C	926	286	1212	0.51385	0	0.339618	745	244	989	0.860292	0.0218311	0.462701	557	212	769	1.19092	0.172054	0.543894	0.448738	0.083978
18S_rRNA_M_Locati	913	C	760	342	1102	0.914597	0.141129	0.477923	654	297	951	1.10582	0.134919	0.525389	737	268	1005	0.729843	0.074425	0.422155	0.475156	0.0421901
18S_rRNA_M_Locati	914	C	2560	458	3018	0.294056	0	0	3227	421	3648	0.497135	0	0	2401	431	2832	0.442354	0	0	0	0
18S_rRNA_M_Locati	915	A	1846	630	2476	0.0240569	0	0	1579	425	2004	0.0650097	0	0.06107	1808	466	2274	0.258457	0	0	0.0203567	0.0287887
18S_rRNA_M_Locati	916	G	1100	571	1671	0.612899	0.0521162	0.380139	846	371	1217	0.871292	0.0885607	0.465814	898	267	1165	0.557461	0	0.358127	0.40136	0.0464535
18S_rRNA_M_Locati	917	C	1422	1042	2464	0.126414	0	0.112268	1317	931	2248	0.00855195	0	0.00848317	1334	295	1629	0.101656	0	0.0923274	0.0710261	0.0449675
18S_rRNA_M_Locati	918	U	2520	1816	4336	0.358843	0	0	2401	1046	3447	0.346665	0	0	2519	443	2962	0.428653	0	0	0	0
18S_rRNA_M_Locati	919	A	2610	1887	4497	0.352337	0	0	2327	984	3311	0.288248	0	0	2091	437	2528	0.309297	0	0	0	0
18S_rRNA_M_Locati	920	G	2048	1893	3941	0.21895	0	0	1831	1138	2969	0.175829	0	0	1253	713	1966	0.101118	0	0	0	0
18S_rRNA_M_Locati	921	G	1567	1567	3134	0.01619	0	0.015937	1036	1272	2308	0.075622	0	0.0703337	827	760	1587	0.0553526	0	0.0524807	0.0462505	0.0226401
18S_rRNA_M_Locati	922	A	1639	1788	3427	0.0920751	0	0	1494	1154	2648	0.0836752	0	0	883	510	1393	0.12655	0	0.112406	0.0374686	0.0529887
18S_rRNA_M_Locati	923	A	995	778	1773	0.844225	0.185184	0.457907	786	689	1475	0.747185	0.185243	0.427817	575	314	889	0.768302	0.161269	0.434762	0.440162	0.012864
18S_rRNA_M_Locati	924	U	2144	1206	3350	0.0977188	0	0	1599	665	2264	0.0985725	0	0.0897639	954	416	1370	0.0589837	0	0.0557368	0.0485002	0.0370015
18S_rRNA_M_Locati	925	A	1574	1366	2940	0.0147002	0	0	1274	1007	2281	0.0658779	0	0.0618316	531	680	1211	0.117987	0	0.105613	0.0558149	0.0433257
18S_rRNA_M_Locati	926	A	1565	1276	2841	0.0183439	0	0	1278	935	2213	0.172503	0	0.147181	552	595	1147	0.172077	0	0.146923	0.0980345	0.069321
18S_rRNA_M_Locati	927	U	1452	2098	3550	0.273982	0	0	1362	1878	3240	0.230385	0	0	305	1019	1324	0.0153124	0	0.0150927	0.00503089	0.00711475
18S_rRNA_M_Locati	928	G	794	1438	2232	0.179305	0	0.152101	748	1267	2015	0.313878	0	0.238984	96	753	849	0.690588	0.152296	0.408774	0.26662	0.106593
18S_rRNA_M_Locati	929	G	663	1259	1922	0.30858	0	0.235907	277	1775	2052	0.281945	0	0.220019	109	1063	1172	0.227707	0	0.185602	0.213843	0.0209961
18S_rRNA_M_Locati	930	A	1175	1147	2322	0.0219783	0	0.0215147	935	1837	2772	0.081396	0	0	252	1091	1343	0.101802	0	0.0924586	0.0379911	0.0395032
18S_rRNA_M_Locati	931	A	912	1121	2033	0.101693	0	0.0923477	765	1793	2558	0.015236	0	0	287	1119	1406	0.0557846	0	0.0528727	0.0484068	0.0378328
18S_rRNA_M_Locati	932	U	1594	1476	3070	0.35938	0	0	1460	4465	5925	0.655702	0	0	247	2205	2452	0.437075	0	0	0	0
18S_rRNA_M_Locati	933	A	876	1280	2156	0.106454	0	0	693	1632	2325	0.00129932	0	0	167	1994	2161	0.33467	0	0	0	0
18S_rRNA_M_Locati	934	G	601	1458	2059	0.121521	0	0	550	1138	1688	0.316117	0	0.240297	126	1657	1783	0.136466	0	0	0.0800991	0.113277
18S_rRNA_M_Locati	935	G	338	926	1264	0.443478	0.0599941	0.307397	327	1331	1658	0.255623	0	0.20368	71	1383	1454	0.139832	0	0.122752	0.211276	0.0755723
18S_rRNA_M_Locati	936	A	164	713	877	1.04928	0.221519	0.512308	144	821	965	1.07082	0.0954934	0.517358	28	1265	1293	0.302233	0	0.232226	0.420631	0.133238
18S_rRNA_M_Locati	937	C	377	809	1186	0.446073	0.0234586	0.308652	218	975	1193	0.535818	0	0.349072	81	811	892	0.943188	0.171167	0.485662	0.381128	0.0757357
18S_rRNA_M_Locati	938	C	453	703	1156	0.542553	0.0212126	0.351921	269	1004	1273	0.33363	0	0.250314	127	943	1070	0.605498	0.065945	0.37736	0.326532	0.0548855
18S_rRNA_M_Locati	939	C	540	857	1397	0.269289	0	0.212277	293	980	1273	0.121298	0	0.108252	428	1094	1522	0.0824834	0	0.0762446	0.132258	0.0580714
18S_rRNA_M_Locati	940	C	1153	1224	2377	0.24665	0	0	440	1517	1957	0.308228	0	0	607	1997	2604	0.393133	0	0	0	0
18S_rRNA_M_Locati	941	G	641	1197	1838	0.0531146	0	0.0504618	238	994	1232	0.16773	0	0.143737	472	2072	2544	0.36788	0	0	0.0647331	0.059542
18S_rRNA_M_Locati	942	G	427	977	1404	0.567078	0.0645343	0.362034	179	667	846	0.871796	0.137334	0.466048	241	1191	1432	0.240513	0	0.193991	0.340691	0.112087
18S_rRNA_M_Locati	943	U	480	1452	1932	0.221268	0	0.181256	191	1552	1743	0.0796827	0	0	242	1219	1461	0.222101	0	0.181839	0.121031	0.0855825
18S_rRNA_M_Locati	944	U	740	2557	3297	0.273472	0	0	365	1030	1395	0.249196	0	0.1996	464	930	1394	0.289319	0	0.224522	0.141374	0.100483
18S_rRNA_M_Locati	945	C	690	2016	2706	0.0283298	0	0	299	888	1187	0.601141	0.110321	0.375643	373	1337	1710	0.00627313	0	0.00623765	0.127294	0.175628
18S_rRNA_M_Locati	946	U	1703	1792	3495	0.254313	0	0	747	1688	2435	0.241347	0	0	680	2016	2696	0.437177	0	0	0	0
18S_rRNA_M_Locati	947	A	960	1244	2204	0.222011	0	0.181744	464	1061	1525	0.284484	0	0.22159	356	1316	1672	0.126805	0	0	0.134445	0.0964485
18S_rRNA_M_Locati	948	U	1920	1919	3839	0.354621	0	0	1140	2042	3182	0.42425	0	0	665	1295	1960	0.364361	0	0	0	0
18S_rRNA_M_Locati	949	U	1408	1869	3277	0.235272	0	0	952	1601	2553	0.216366	0	0	425	929	1354	0.129373	0	0	0	0
18S_rRNA_M_Locati	950	U	1178	1905	3083	0.218713	0	0	762	1374	2136	0.0524827	0	0	179	749	928	0.159407	0	0.137618	0.0458726	0.0648736
18S_rRNA_M_Locati	951	U	1537	1263	2800	0.177111	0	0	1204	1546	2750	0.309706	0	0	213	296	509	0.907538	0.16024	0.476254	0.158751	0.224508
18S_rRNA_M_Locati	952	C	1013	670	1683	0.363183	0.0321888	0.266539	826	975	1801	0.0771057	0	0.0716229	204	224	428	0.923025	0.101956	0.480569	0.27291	0.167012
18S_rRNA_M_Locati	953	U	392	279	671	2.4044	0.444646	0.706571	427	523	950	1.0354	0.179238	0.508959	78	123	201	2.3412	0.343498	0.701746	0.639092	0.0920389
18S_rRNA_M_Locati	954	G	809	670	1479	0.431907	0	0.301773	746	988	1734	0.0289337	0	0.0281359	179	137	316	0.763722	0	0.433793	0.254567	0.168939
18S_rRNA_M_Locati	955	U	378	1199	1577	0.260696	0	0.206891	484	1925	2409	0.332319	0	0	123	205	328	0.400371	0	0.286526	0.164472	0.120758
18S_rRNA_M_Locati	956	G	270	989	1259	0.582425	0.0762404	0.368243	300	1047	1347	0.242763	0	0.195458	58	234	292	0.539211	0	0.351095	0.304932	0.0777258
18S_rRNA_M_Locati	957	G	143	2476	2619	0.292053	0	0	156	730	886	1.13164	0.0712996	0.531159	50	195	245	0.989205	0.106263	0.498305	0.343155	0.243017
18S_rRNA_M_Locati	958	G	457	1506	1963	0.0116882	0	0	352	593	945	1.04047	0.0819648	0.510182	72	260	332	0.559259	0.0275911	0.359362	0.289848	0.214003
18S_rRNA_M_Locati	959	U	968	1623	2591	0.264073	0	0	766	837	1603	0.209968	0	0.173621	152	371	523	0.0420696	0	0.0404452	0.0713555	0.0741741
18S_rRNA_M_Locati	960	U	540	1181	1721	0.204065	0	0.169562	740	691	1431	0.460397	0	0.315406	111	398	509	0.179782	0	0.15264	0.212536	0.0730674
18S_rRNA_M_Locati	961	U	1270	700	1970	0.0383393	0	0.0369417	1548	610	2158	0.0211775	0	0	239	278	517	0.254076	0	0.202912	0.0799513	0.0882448
18S_rRNA_M_Locati	962	C	1786	706	2492	0.198485	0	0	1475	614	2089	0.0907549	0	0.0832403	985	173	1158	0.460943	0	0	0.0277468	0.0392398
18S_rRNA_M_Locati	963	C	1724	1071	2795	0.29266	0	0	4718	659	5377	0.627286	0	0	925	348	1273	0.464042	0	0	0	0
18S_rRNA_M_Locati	964	G	1333	727	2060	0.0101407	0	0	2298	398	2696	0.0751411	0	0	588	150	738	0.155435	0	0.134683	0.0448943	0.0634902
18S_rRNA_M_Locati	965	G	1093	556	1649	0.275912	0.0153214	0.21635	1767	254	2021	0.315007	0	0.239638	498	232	730	0.330765	0	0.248808	0.234932	0.0136624
18S_rRNA_M_Locati	966	A	886	617	1503	0.394371	0.0599743	0.282965	1647	264	1911	0.407473	0	0.289615	248	346	594	0.823697	0.0708164	0.45208	0.341553	0.0782013
18S_rRNA_M_Locati	967	A	708	688	1396	0.511986	0.10142	0.338779	1996	207	2203	0.212745	0	0.17549	316	324	640	0.830057	0.126487	0.453956	0.322741	0.114248
18S_rRNA_M_Locati	968	C	1037	863	1900	0.0579052	0	0.0547629	3449	218	3667	0.341197	0	0	450	298	748	0.643109	0.0834671	0.391716	0.148826	0.173198
18S_rRNA_M_Locati	969	C	1061	907	1968	0.0123864	0	0	1657	217	1874	0.350287	0	0.259519	977	325	1302	0.0646713	0	0	0.0865065	0.122339
18S_rRNA_M_Locati	970	C	1447	1289	2736	0.318853	0	0	2903	749	3652	0.404328	0	0	1352	707	2059	0.384407	0	0	0	0
18S_rRNA_M_Locati	971	G	1251	1476	2727	0.322471	0	0	1542	886	2428	0.0853987	0	0	1565	619	2184	0.374167	0	0	0	0
18S_rRNA_M_Locati	972	G	1067	1148	2215	0.128685	0	0	1391	556	1947	0.163199	0	0.140364	1160	565	1725	0.113609	0	0	0.0467879	0.066168
18S_rRNA_M_Locati	973	G	1083	580	1663	0.177871	0	0.151088	1352	490	1842	0.202797	0	0.168681	1139	325	1464	0.106098	0	0.0959801	0.138583	0.0309691
18S_rRNA_M_Locati	974	G	486	509	995	0.992938	0.176828	0.498479	680	261	941	1.36632	0.217566	0.577663	771	151	922	0.849862	0.0700676	0.459688	0.511944	0.0490949
18S_rRNA_M_Locati	975	C	430	815	1245	0.510612	0	0.338196	878	380	1258	0.649554	0.0168967	0.393965	1072	103	1175	0.433447	0	0.30256	0.344907	0.0376165
18S_rRNA_M_Locati	976	C	1399	1419	2818	0.407528	0	0	2652	693	3345	0.421492	0	0	2708	164	2872	0.494245	0	0	0	0
18S_rRNA_M_Locati	977	A	589	1061	1650	0.025069	0	0.0244704	1015	522	1537	0.320597	0	0.242886	1792	155	1947	0.251221	0	0	0.0891188	0.109188
18S_rRNA_M_Locati	978	U	1045	1292	2337	0.341065	0	0	1516	1218	2734	0.306967	0	0	1875	254	2129	0.373292	0	0	0	0
18S_rRNA_M_Locati	979	G	699	561	1260	0.279522	0	0.218594	1012	606	1618	0.252152	0	0.201474	1100	179	1279	0.0506337	0	0.0482293	0.156099	0.076595
18S_rRNA_M_Locati	980	A	485	472	957	0.724136	0.0818541	0.420254	672	566	1238	0.701381	0	0.412438	644	201	845	0.539493	0.0163082	0.350705	0.394465	0.0311076
18S_rRNA_M_Locati	981	U	414	594	1008	0.680333	0.105014	0.405119	1006	808	1814	0.199394	0	0.166322	620	176	796	0.545169	0.0162968	0.353108	0.308183	0.102534
18S_rRNA_M_Locati	982	C	701	1221	1922	0.146207	0	0	2572	1310	3882	0.482534	0	0	427	352	779	0.455655	0	0.3133	0.104433	0.147691
18S_rRNA_M_Locati	983	G	293	779	1072	0.585099	0.123125	0.369342	466	713	1179	0.935716	0.150455	0.483607	393	245	638	0.53575	0	0.349208	0.400719	0.0591842
18S_rRNA_M_Locati	984	A	690	1222	1912	0.15476	0	0	1040	1261	2301	0.0426586	0	0	831	254	1085	0.236965	0	0	0	0
18S_rRNA_M_Locati	985	G	621	1052	1673	0.011808	0	0.0116771	686	1103	1789	0.323625	0	0.244602	705	346	1051	0.26749	0	0	0.0854265	0.112655
18S_rRNA_M_Locati	986	A	759	1278	2037	0.147143	0	0	765	1541	2306	0.0641381	0	0.0602969	332	440	772	0.0219347	0	0.0214911	0.0272627	0.0249521
18S_rRNA_M_Locati	987	G	729	1294	2023	0.115431	0	0	628	2512	3140	0.216665	0	0	281	282	563	0.426773	0.000498216	0.29949	0.09983	0.141181
18S_rRNA_M_Locati	988	G	806	1363	2169	0.155837	0	0	700	1629	2329	0.123572	0	0.110023	152	252	404	1.08217	0.198326	0.520348	0.210124	0.223913
18S_rRNA_M_Locati	989	G	680	979	1659	0.155395	0	0.134565	476	1825	2301	0.120789	0	0.107813	24	417	441	0.967345	0.184488	0.492267	0.244882	0.175268
18S_rRNA_M_Locati	990	A	638	767	1405	0.459641	0.102635	0.315054	453	1766	2219	0.225506	0	0.184078	38	574	612	0.498894	0.0684368	0.333204	0.277445	0.0664352
18S_rRNA_M_Locati	991	C	1045	1582	2627	0.243679	0	0	1006	3170	4176	0.366427	0	0	132	1193	1325	0.274543	0	0	0	0
18S_rRNA_M_Locati	992	G	856	1328	2184	0.0280041	0	0	849	2595	3444	0.173888	0	0	257	972	1229	0.0761427	0	0	0	0
18S_rRNA_M_Locati	993	G	563	815	1378	0.672339	0.167089	0.40221	535	1769	2304	0.339981	0.011432	0.253803	210	550	760	0.779019	0.0355839	0.438216	0.364743	0.0798118
18S_rRNA_M_Locati	994	C	835	1084	1919	0.177899	0	0.151098	991	1438	2429	0.261349	0	0.207266	311	853	1164	0.249375	0	0.199737	0.186034	0.0248937
18S_rRNA_M_Locati	995	C	1087	1206	2293	0.0275404	0	0.0268137	1197	1176	2373	0.378536	0.0137297	0.274677	321	809	1130	0.513341	0.035566	0.339409	0.213633	0.134719
18S_rRNA_M_Locati	996	G	1696	1168	2864	0.166733	0	0	1806	1167	2973	0.097721	0	0.089049	495	1025	1520	0.220148	0	0.180524	0.0898578	0.0737009
18S_rRNA_M_Locati	997	G	1615	1362	2977	0.162995	0	0	1446	3102	4548	0.300623	0	0	1080	1693	2773	0.316863	0	0	0	0
18S_rRNA_M_Locati	998	G	1609	1202	2811	0.096345	0	0	1539	1911	3450	0.0439808	0	0	1669	1418	3087	0.357254	0	0	0	0
18S_rRNA_M_Locati	999	G	2159	952	3111	0.154556	0	0	1648	2425	4073	0.176632	0	0	1285	1198	2483	0.119351	0	0	0	0
18S_rRNA_M_Locati	1000	G	1013	487	1500	0.917729	0.195776	0.478716	885	1491	2376	0.497826	0	0.332459	643	1162	1805	0.29402	0	0.227312	0.346162	0.103092
18S_rRNA_M_Locati	1001	C	3176	660	3836	0.265349	0	0	3326	2032	5358	0.35528	0	0	1891	1594	3485	0.348569	0	0	0	0
18S_rRNA_M_Locati	1002	A	1813	586	2399	0.24931	0	0.199625	1649	661	2310	0.647916	0.0201653	0.393276	1476	633	2109	0.163433	0	0.140532	0.244478	0.107947
18S_rRNA_M_Locati	1003	U	2079	796	2875	0.0163885	0	0.0161298	1653	1651	3304	0.110593	0	0.0996076	1217	1134	2351	0.0198318	0	0.0194543	0.0450639	0.0385921
18S_rRNA_M_Locati	1004	U	1997	554	2551	0.148546	0	0.129378	1857	1463	3320	0.0767138	0	0.0712681	1207	1076	2283	0.0102209	0	0.0101218	0.0702559	0.0486914
18S_rRNA_M_Locati	1005	C	3222	835	4057	0.340625	0	0	3800	1475	5275	0.380625	0	0	1543	1190	2733	0.241429	0	0	0	0
18S_rRNA_M_Locati	1006	G	1645	395	2040	0.403985	0	0.287842	1197	661	1858	1.04367	0.0538519	0.510818	881	556	1437	0.443579	0	0.307425	0.368695	0.100814
18S_rRNA_M_Locati	1007	U	4860	684	5544	0.56214	0	0	5525	1243	6768	0.494005	0	0	2461	889	3350	0.490102	0	0	0	0
18S_rRNA_M_Locati	1008	A	1375	514	1889	0.446561	0	0.308818	1429	586	2015	1.05595	0.0549012	0.51373	852	740	1592	0.0694218	0	0.0649534	0.295834	0.183442
18S_rRNA_M_Locati	1009	U	1617	476	2093	0.31767	0	0.241172	2062	532	2594	0.844706	0	0.458004	766	674	1440	0.108258	0	0.0977444	0.26564	0.148089
18S_rRNA_M_Locati	1010	U	1404	675	2079	0.295743	0	0.228326	2038	648	2686	0.926874	0.026869	0.481118	622	855	1477	0.0320929	0	0	0.236481	0.1965
18S_rRNA_M_Locati	1011	G	950	292	1242	1.24737	0.177066	0.555234	1585	532	2117	1.75393	0.284046	0.636992	172	201	373	2.86378	0.436133	0.7417	0.644642	0.0763164
18S_rRNA_M_Locati	1012	C	1910	646	2556	0.054982	0	0.0521358	6173	728	6901	0.116911	0	0	322	364	686	0.940741	0.0421951	0.485097	0.179077	0.217432
18S_rRNA_M_Locati	1013	G	1497	306	1803	0.636752	0.0326244	0.389166	5709	404	6113	0.146018	0	0.127432	422	78	500	1.74804	0.238209	0.636566	0.384388	0.207881
18S_rRNA_M_Locati	1014	C	2259	606	2865	0.0197488	0	0	7375	563	7938	0.0960266	0	0	1033	132	1165	0.0918239	0	0.0841675	0.0280558	0.0396769
18S_rRNA_M_Locati	1015	C	3430	1135	4565	0.37074	0	0	13015	967	13982	0.494455	0	0	1287	190	1477	0.0626973	0	0	0	0
18S_rRNA_M_Locati	1016	G	1722	582	2304	0.46388	0.0254124	0.316978	6534	420	6954	0.184063	0	0.155469	759	109	868	0.852116	0.13359	0.460363	0.310937	0.124546
18S_rRNA_M_Locati	1017	C	2253	700	2953	0.164733	0	0.141475	8219	1083	9302	0.126118	0	0	1276	231	1507	0.105224	0	0.0952632	0.0789129	0.0589029
18S_rRNA_M_Locati	1018	U	3830	960	4790	0.260901	0	0	12600	1290	13890	0.434614	0	0	1782	321	2103	0.121467	0	0	0	0
18S_rRNA_M_Locati	1019	A	3116	1084	4200	0.104155	0	0	8147	1368	9515	0.157226	0	0	1548	522	2070	0.0287086	0	0	0	0
18S_rRNA_M_Locati	1020	G	2355	943	3298	0.217318	0	0.178567	5135	875	6010	0.328733	0	0.247434	1499	823	2322	0.0819534	0	0	0.142	0.104271
18S_rRNA_M_Locati	1021	A	3326	1557	4883	0.198742	0	0	5585	1529	7114	0.0226064	0	0.0221097	2216	1142	3358	0.365813	0	0	0.00736989	0.0104226
18S_rRNA_M_Locati	1022	G	2638	2036	4674	0.165963	0	0	3604	1909	5513	0.189481	0	0.159322	1694	1131	2825	0.208638	0	0	0.0531072	0.075105
18S_rRNA_M_Locati	1023	G	1560	1249	2809	0.460996	0.0474047	0.315613	3555	931	4486	0.357631	0	0.263466	1470	619	2089	0.116374	0	0.104288	0.227789	0.0898858
18S_rRNA_M_Locati	1024	U	2875	2694	5569	0.337748	0	0	5801	2375	8176	0.397647	0	0	1576	1667	3243	0.338505	0	0	0	0
18S_rRNA_M_Locati	1025	G	1924	2107	4031	0.0766645	0	0	2278	1460	3738	0.225479	0	0.184033	826	1066	1892	0.196584	0	0.16436	0.116131	0.0825088
18S_rRNA_M_Locati	1026	A	1907	1739	3646	0.00555099	0	0.00552185	1548	1572	3120	0.317462	0	0.241024	915	1011	1926	0.171026	0	0.146113	0.130886	0.0967442
18S_rRNA_M_Locati	1027	A	2349	1456	3805	0.036206	0	0	1543	1524	3067	0.236328	0	0.191204	1265	1139	2404	0.100282	0	0	0.0637346	0.0901344
18S_rRNA_M_Locati	1028	A	1696	1732	3428	0.0569781	0	0.0539214	481	2009	2490	0.392497	0	0.281947	674	1111	1785	0.178437	0	0.151491	0.162453	0.0934133
18S_rRNA_M_Locati	1029	U	1084	1132	2216	0.644404	0.114183	0.391985	204	1336	1540	1.14664	0.157011	0.534318	497	664	1161	0.771763	0.107207	0.435802	0.454035	0.0595204
18S_rRNA_M_Locati	1030	U	921	996	1917	0.898459	0.180305	0.473387	409	898	1307	1.39309	0.180361	0.582317	790	355	1145	0.72485	0.0348862	0.420452	0.492052	0.0673862
18S_rRNA_M_Locati	1031	C	1561	1738	3299	0.0154646	0	0.0152337	1472	1584	3056	0.15352	0	0	1659	737	2396	0.28252	0	0	0.00507789	0.00718123
18S_rRNA_M_Locati	1032	U	1398	2344	3742	0.0946864	0	0	1533	2249	3782	0.351264	0	0	2017	956	2973	0.412131	0	0	0	0
18S_rRNA_M_Locati	1033	U	1887	3219	5106	0.347912	0	0	735	2802	3537	0.309016	0	0	917	1481	2398	0.214784	0	0	0	0
18S_rRNA_M_Locati	1034	G	1674	2556	4230	0.19261	0	0	142	2342	2484	0.00334004	0	0.00333026	288	1148	1436	0.377631	0	0.274255	0.0925283	0.128507
18S_rRNA_M_Locati	1035	G	1543	1403	2946	0.238732	0	0.192776	548	1856	2404	0.0943082	0	0.0862134	59	933	992	1.15365	0.115682	0.535923	0.271638	0.191875
18S_rRNA_M_Locati	1036	A	1248	1115	2363	0.578064	0.0397102	0.366411	373	1512	1885	0.454748	0	0.31271	60	730	790	1.79851	0.255651	0.642958	0.440693	0.144693
18S_rRNA_M_Locati	1037	C	1485	1372	2857	0.444732	0	0.307905	354	1528	1882	0.624217	0.0308432	0.384444	555	682	1237	0.896491	0.107822	0.472912	0.38842	0.0674225
18S_rRNA_M_Locati	1038	C	2766	2329	5095	0.212332	0	0	615	2038	2653	0.193088	0	0.16189	2178	1695	3873	0.45197	0	0	0.0539633	0.0763157
18S_rRNA_M_Locati	1039	G	2344	2414	4758	0.0997689	0	0	818	1672	2490	0.438231	0	0.304786	2182	1144	3326	0.320001	0	0	0.101595	0.143678
18S_rRNA_M_Locati	1040	G	1500	1415	2915	0.559545	0	0.358866	793	1215	2008	0.990443	0.197395	0.497724	1407	648	2055	0.203399	0	0.169089	0.341893	0.1347
18S_rRNA_M_Locati	1041	C	2527	2212	4739	0.071887	0	0	1980	3304	5284	0.241392	0	0	2368	1148	3516	0.318346	0	0	0	0
18S_rRNA_M_Locati	1042	G	1295	781	2076	1.37226	0.187233	0.578578	1052	1433	2485	1.04275	0.157177	0.510564	1133	243	1376	1.03337	0.151267	0.508386	0.53251	0.0325874
18S_rRNA_M_Locati	1043	C	8013	2013	10026	0.584476	0	0	2811	4224	7035	0.264934	0	0	2546	1119	3665	0.27936	0	0	0	0
18S_rRNA_M_Locati	1044	A	2546	1932	4478	0.0815237	0	0.0753941	1854	3647	5501	0.102381	0	0.0928879	1391	1161	2552	0.100496	0	0.0913515	0.0865445	0.00790943
18S_rRNA_M_Locati	1045	A	2828	3758	6586	0.323747	0	0	2339	6584	8923	0.317155	0	0	1513	1611	3124	0.157045	0	0	0	0
18S_rRNA_M_Locati	1046	G	1484	2595	4079	0.128197	0	0.113655	1207	5273	6480	0.0807317	0	0.0747116	1091	1397	2488	0.0525378	0	0.0499344	0.0794336	0.0262271
18S_rRNA_M_Locati	1047	A	1281	2081	3362	0.375326	0	0.272959	963	4439	5402	0.444387	0.0250054	0.307704	1120	1258	2378	0.109439	0	0.098681	0.226448	0.0914517
18S_rRNA_M_Locati	1048	C	1054	3960	5014	0.159832	0	0	2142	9422	11564	0.359217	0	0	1521	1852	3373	0.284865	0	0	0	0
18S_rRNA_M_Locati	1049	G	313	3626	3939	0.0694078	0	0.0649184	1055	6905	7960	0.00397772	0	0.00396246	1050	1491	2541	0.0356981	0	0	0.0229603	0.0297129
18S_rRNA_M_Locati	1050	G	917	2363	3280	0.156585	0	0.135421	988	8825	9813	0.227118	0	0	840	1238	2078	0.123045	0	0.109611	0.0816774	0.058708
18S_rRNA_M_Locati	1051	A	853	2412	3265	0.0792237	0	0.0734288	702	4923	5625	0.392059	0	0.281675	720	1357	2077	0.0474709	0	0.0453403	0.133482	0.105414
18S_rRNA_M_Locati	1052	C	724	2769	3493	0.0797749	0	0	1113	9270	10383	0.331137	0	0	881	1056	1937	0.0534629	0	0.0507746	0.0169249	0.0239354
18S_rRNA_M_Locati	1053	C	684	2979	3663	0.172013	0	0	1874	9151	11025	0.41771	0	0	888	1745	2633	0.312575	0	0	0	0
18S_rRNA_M_Locati	1054	G	773	1779	2552	0.187927	0	0.15825	1740	5911	7651	0.181846	0	0	949	868	1817	0.0318726	0	0	0.0527499	0.0745996
18S_rRNA_M_Locati	1055	G	1306	1076	2382	0.201292	0.00575127	0.167621	1186	2336	3522	0.651919	0.0796193	0.394711	459	677	1136	0.489925	0.0896851	0.329019	0.297117	0.0954142
18S_rRNA_M_Locati	1056	A	1247	1557	2804	0.029594	0	0	1174	2163	3337	0.544811	0	0.35274	398	1108	1506	0.0781391	0	0.0725205	0.141753	0.152099
18S_rRNA_M_Locati	1057	G	410	795	1205	1.31323	0.317027	0.567908	658	1789	2447	0.837741	0	0.455955	194	484	678	1.47709	0.276522	0.596655	0.540173	0.0606964
18S_rRNA_M_Locati	1058	C	445	2440	2885	0.10539	0	0	893	4241	5134	0.268294	0	0	217	1214	1431	0.13916	0	0.122235	0.0407452	0.0576224
18S_rRNA_M_Locati	1059	G	268	2290	2558	0.000707742	0	0	287	1679	1966	0.738643	0	0.424963	82	817	899	0.842568	0.0609723	0.457555	0.294173	0.208437
18S_rRNA_M_Locati	1060	A	588	1966	2554	0.000639269	0	0.000639111	502	1063	1565	0.832879	0.0572847	0.454569	69	1037	1106	0.438623	0	0.305082	0.25343	0.188881
18S_rRNA_M_Locati	1061	A	636	2103	2739	0.0661273	0	0	609	834	1443	0.718775	0.0571741	0.418359	76	1876	1952	0.222273	0	0	0.139453	0.197216
18S_rRNA_M_Locati	1062	A	750	2363	3113	0.181885	0	0	659	1383	2042	0.108794	0	0.0981628	98	2831	2929	0.501521	0	0	0.0327209	0.0462744
18S_rRNA_M_Locati	1063	G	463	1140	1603	0.691895	0.134197	0.409098	294	1110	1404	0.573357	0	0.364581	155	1553	1708	0.0477407	0	0	0.257893	0.183261
18S_rRNA_M_Locati	1064	C	846	2502	3348	0.223493	0	0	592	2560	3152	0.383684	0	0	422	2336	2758	0.443172	0	0	0	0
18S_rRNA_M_Locati	1065	G	421	1824	2245	0.245538	0.000620754	0.197204	288	1361	1649	0.203468	0	0.169153	222	601	823	1.13883	0.193805	0.532758	0.299705	0.165191
18S_rRNA_M_Locati	1066	U	645	2756	3401	0.211046	0	0	406	2404	2810	0.345662	0	0	451	692	1143	0.499048	0.0272493	0.333104	0.111035	0.157027
18S_rRNA_M_Locati	1067	U	375	2211	2586	0.102126	0	0.0926952	204	1282	1486	0.375215	0	0.272974	284	1157	1441	0.17542	0	0.149328	0.171666	0.0752745
18S_rRNA_M_Locati	1068	U	416	2277	2693	0.0692609	0	0.0647971	242	1368	1610	0.272405	0	0.214191	173	1416	1589	0.0366527	0	0.0353782	0.104789	0.0782859
18S_rRNA_M_Locati	1069	G	373	1936	2309	0.257561	0	0.204881	228	1218	1446	0.422714	0.0190413	0.297262	116	1614	1730	0.0944541	0	0	0.167381	0.12422
18S_rRNA_M_Locati	1070	C	676	2103	2779	0.039972	0	0.038449	435	1326	1761	0.162126	0	0.139577	194	1262	1456	0.101838	0	0.0924831	0.0901695	0.0413176
18S_rRNA_M_Locati	1071	C	1483	2501	3984	0.306087	0	0	1075	1679	2754	0.298843	0	0	496	1382	1878	0.175217	0	0	0	0
18S_rRNA_M_Locati	1072	A	980	1649	2629	0.111677	0	0.100493	663	1100	1763	0.157905	0	0.136438	268	888	1156	0.466167	0.111759	0.318137	0.185023	0.0952632
18S_rRNA_M_Locati	1073	A	1665	1999	3664	0.241234	0	0	1072	1617	2689	0.288443	0	0	578	1237	1815	0.0784875	0	0	0	0
18S_rRNA_M_Locati	1074	G	1464	1687	3151	0.110138	0	0	699	1209	1908	0.0604214	0	0.0570068	307	1366	1673	0.0151732	0	0.0149553	0.0239874	0.0241334
18S_rRNA_M_Locati	1075	A	1126	1053	2179	0.30235	0.0050085	0.232239	743	1055	1798	0.126521	0	0.112367	335	1401	1736	0.0318685	0	0	0.114868	0.0948276
18S_rRNA_M_Locati	1076	A	1209	818	2027	0.360382	0.000139194	0.265009	799	996	1795	0.126491	0	0.112343	521	1220	1741	0.0554663	0	0	0.125784	0.108606
18S_rRNA_M_Locati	1077	C	1657	1752	3409	0.255934	0	0	1144	1716	2860	0.317748	0	0	933	1389	2322	0.31258	0	0	0	0
18S_rRNA_M_Locati	1078	G	839	1416	2255	0.0956708	0	0.0873524	462	813	1275	0.601385	0.0744807	0.375724	604	1028	1632	0.00327278	0	0.00326409	0.155447	0.159498
18S_rRNA_M_Locati	1079	U	1896	1270	3166	0.291622	0	0	1069	1165	2234	0.145339	0	0	1363	484	1847	0.120292	0	0	0	0
18S_rRNA_M_Locati	1080	U	1068	1195	2263	0.0119356	0	0	739	1044	1783	0.0880481	0	0.0809647	923	407	1330	0.298481	0.00459186	0.230002	0.103656	0.095259
18S_rRNA_M_Locati	1081	U	800	1015	1815	0.183908	0	0.155412	505	1019	1524	0.273086	0	0.214617	781	447	1228	0.425278	0.0505693	0.298553	0.222861	0.0587269
18S_rRNA_M_Locati	1082	U	595	625	1220	0.744708	0.111004	0.427039	463	1155	1618	0.173742	0	0.148102	737	274	1011	0.769444	0.164179	0.435094	0.336745	0.133431
18S_rRNA_M_Locati	1083	C	2175	357	2532	0.245352	0	0	1950	1154	3104	0.457084	0	0	1824	163	1987	0.138375	0	0	0	0
18S_rRNA_M_Locati	1084	A	768	261	1029	1.20968	0.0241402	0.547686	668	500	1168	0.876533	0	0.467315	1292	96	1388	0.453652	0	0.312232	0.442411	0.0977234
18S_rRNA_M_Locati	1085	U	1069	385	1454	0.539015	0	0.35039	745	909	1654	0.319705	0	0.242366	1660	167	1827	0.130604	0	0.115573	0.23611	0.0959657
18S_rRNA_M_Locati	1086	U	1996	740	2736	0.231815	0	0	1391	1066	2457	0.139187	0	0	2701	259	2960	0.291313	0	0	0	0
18S_rRNA_M_Locati	1087	A	1015	487	1502	0.522651	0	0.343401	735	654	1389	0.631783	0	0.387344	1685	226	1911	0.227667	0	0.185526	0.305424	0.0866576
18S_rRNA_M_Locati	1088	A	967	441	1408	0.676366	0	0.403643	797	483	1280	0.796643	0	0.443599	1602	162	1764	0.391369	0	0.281398	0.376213	0.0690004
18S_rRNA_M_Locati	1089	U	1053	616	1669	0.396587	0	0.28409	772	479	1251	0.807029	0	0.446803	1830	165	1995	0.2196	0	0.180133	0.303676	0.109745
18S_rRNA_M_Locati	1090	C	6592	761	7353	0.767839	0	0	7407	804	8211	0.829972	0	0	5788	166	5954	0.67165	0	0	0	0
18S_rRNA_M_Locati	1091	A	1362	348	1710	0.397389	0	0.284499	968	242	1210	0.794862	0	0.443058	1850	81	1931	0.219128	0	0.179818	0.302458	0.108215
18S_rRNA_M_Locati	1092	A	1910	402	2312	0.000672527	0	0	1597	186	1783	0.134317	0	0.118471	3266	95	3361	0.383955	0	0	0.0394904	0.0558478
18S_rRNA_M_Locati	1093	G	1553	310	1863	0.247347	0	0.198384	1076	379	1455	0.3558	0	0.262561	2010	189	2199	0.0808737	0	0	0.153648	0.11176
18S_rRNA_M_Locati	1094	A	1274	488	1762	0.37987	0	0.275407	884	240	1124	0.818795	0	0.450406	1445	188	1633	0.203067	0	0.168877	0.29823	0.116061
18S_rRNA_M_Locati	1095	A	26	32	58	44.5002	0.923137	0.978387	39	15	54	38.3883	0.87327	0.975062	56	30	86	22.0461	0.865062	0.957086	0.970178	0.00935647
18S_rRNA_M_Locati	1096	C	1687	1048	2735	0.0876584	0	0	1451	447	1898	0.0517641	0	0.0492411	1078	333	1411	0.232019	0	0.188433	0.0792246	0.0797955
18S_rRNA_M_Locati	1097	G	1268	788	2056	0.29792	0	0.229623	832	669	1501	0.285064	0	0.221944	578	318	896	0.746798	0.0514539	0.427797	0.293121	0.0952818
18S_rRNA_M_Locati	1098	A	1608	858	2466	0.208467	0	0.172563	1105	707	1812	0.189453	0	0.159351	740	503	1243	0.198741	0	0.165902	0.165939	0.00539397
18S_rRNA_M_Locati	1099	A	2010	986	2996	0.0800133	0	0.0741084	1679	620	2299	0.00238647	0	0	936	474	1410	0.0230254	0	0	0.0247028	0.034935
18S_rRNA_M_Locati	1100	A	2546	1520	4066	0.149529	0	0	2404	855	3259	0.262546	0	0	1004	754	1758	0.230762	0	0	0	0
18S_rRNA_M_Locati	1101	G	1568	1082	2650	0.480238	0	0.324516	1050	882	1932	0.439035	0	0.3052	627	493	1120	0.348052	0	0.25836	0.296025	0.0277762
18S_rRNA_M_Locati	1102	U	2593	1193	3786	0.0718892	0	0.0670843	1771	721	2492	0.165606	0	0.142126	1138	460	1598	0.0297756	0	0	0.0697368	0.058053
18S_rRNA_M_Locati	1103	C	5264	2205	7469	0.512488	0	0	3201	1774	4975	0.476244	0	0	1476	755	2231	0.356023	0	0	0	0
18S_rRNA_M_Locati	1104	G	3213	2476	5689	0.331047	0	0	2117	2060	4177	0.366193	0	0	818	560	1378	0.0944001	0	0.0863146	0.0287715	0.0406891
18S_rRNA_M_Locati	1105	G	2225	2709	4934	0.205467	0	0	1443	1638	3081	0.0767251	0	0	482	812	1294	0.240867	0	0.194232	0.0647442	0.0915621
18S_rRNA_M_Locati	1106	A	1484	3426	4910	0.231747	0	0	890	2404	3294	0.168552	0	0	310	1657	1967	0.190204	0	0	0	0
18S_rRNA_M_Locati	1107	G	959	3050	4009	0.0920809	0	0	701	2474	3175	0.186779	0	0	189	2329	2518	0.365882	0	0	0	0
18S_rRNA_M_Locati	1108	G	1145	1079	2224	0.670127	0.0817936	0.401351	769	1054	1823	0.457322	0	0.313928	296	936	1232	0.55132	0	0.355574	0.356951	0.0357037
18S_rRNA_M_Locati	1109	U	646	433	1079	2.38748	0.407213	0.704988	360	161	521	4.16098	0.544751	0.806538	171	61	232	8.25699	0.723945	0.892387	0.801304	0.0765949
18S_rRNA_M_Locati	1110	U	830	391	1221	1.68067	0.280025	0.62715	535	103	638	2.80657	0.369512	0.7376	419	41	460	3.84483	0.56596	0.79395	0.719567	0.0692793
18S_rRNA_M_Locati	1111	C	2614	1911	4525	0.392409	0	0	1735	2541	4276	0.554626	0	0	1160	2016	3176	0.319659	0	0	0	0
18S_rRNA_M_Locati	1112	G	1408	994	2402	0.192241	0	0.1613	885	1214	2099	0.0184339	0	0	477	2134	2611	0.0899481	0	0	0.0537666	0.0760375
18S_rRNA_M_Locati	1113	A	1305	1196	2501	0.0667732	0	0.0626171	720	938	1658	0.179673	0	0.152385	563	2345	2908	0.172873	0	0	0.0716675	0.0625394
18S_rRNA_M_Locati	1114	A	1849	1598	3447	0.295086	0	0	959	1391	2350	0.265991	0	0	525	3517	4042	0.44262	0	0	0	0
18S_rRNA_M_Locati	1115	G	1763	1280	3043	0.133085	0	0	844	1226	2070	0.128124	0	0	575	2655	3230	0.225592	0	0	0	0
18S_rRNA_M_Locati	1116	A	1123	911	2034	0.435233	0	0.303353	340	779	1119	0.773036	0	0.436215	689	1861	2550	0.0675944	0	0.0633379	0.267635	0.154307
18S_rRNA_M_Locati	1117	C	1386	2192	3578	0.185067	0	0	487	1990	2477	0.224253	0	0	677	3217	3894	0.327117	0	0	0	0
18S_rRNA_M_Locati	1118	G	800	1726	2526	0.184549	0	0.155849	298	1200	1498	0.281299	0	0.219656	346	1656	2002	0.350569	0	0.259667	0.211724	0.0427531
18S_rRNA_M_Locati	1119	A	512	756	1268	1.67045	0.316356	0.625716	143	577	720	1.9791	0.335276	0.664638	287	1177	1464	0.840554	0.132306	0.456855	0.582403	0.0901868
18S_rRNA_M_Locati	1120	U	488	920	1408	1.50456	0.304326	0.600898	181	507	688	2.23091	0.381621	0.6908	255	698	953	1.76067	0.292159	0.638011	0.643237	0.0368879
18S_rRNA_M_Locati	1121	C	3209	2140	5349	0.393624	0	0	1789	1452	3241	0.373096	0	0	1426	2362	3788	0.43087	0	0	0	0
18S_rRNA_M_Locati	1122	A	2562	1565	4127	0.0951174	0	0	1109	1232	2341	0.00815542	0	0.00809288	1326	1749	3075	0.297862	0	0	0.00269763	0.00381502
18S_rRNA_M_Locati	1123	G	3522	962	4484	0.132496	0	0	1971	1033	3004	0.188978	0	0	1259	980	2239	0.0467411	0	0	0	0
18S_rRNA_M_Locati	1124	A	2029	1131	3160	0.30844	0	0.235788	1159	990	2149	0.220016	0	0.180407	885	789	1674	0.196053	0	0.163999	0.193398	0.0307137
18S_rRNA_M_Locati	1125	U	4008	2211	6219	0.358283	0	0	2470	1814	4284	0.405018	0	0	1040	1316	2356	0.213911	0	0	0	0
18S_rRNA_M_Locati	1126	A	1842	1719	3561	0.240361	0	0.193827	1008	892	1900	0.534286	0	0.34835	679	595	1274	0.494771	0	0.331175	0.291118	0.0691511
18S_rRNA_M_Locati	1127	C	2452	1930	4382	0.0259665	0	0.0253149	1745	1066	2811	0.047973	0	0.0457925	1072	554	1626	0.120419	0	0.107536	0.0595478	0.0349474
18S_rRNA_M_Locati	1128	C	3804	3439	7243	0.440987	0	0	2764	1893	4657	0.428827	0	0	1157	1046	2203	0.286489	0	0	0	0
18S_rRNA_M_Locati	1129	G	1764	1694	3458	0.244865	0	0.196746	1185	1193	2378	0.192154	0	0.161239	571	460	1031	0.501981	0.0897654	0.334428	0.230804	0.0746934
18S_rRNA_M_Locati	1130	U	1567	1740	3307	0.243014	0	0.195551	1205	1400	2605	0.0293767	0	0.0285489	589	359	948	0.537302	0.0761817	0.34975	0.191283	0.131164
18S_rRNA_M_Locati	1131	C	1877	3103	4980	0.243135	0	0	1397	2176	3573	0.311295	0	0	783	760	1543	0.127713	0	0	0	0
18S_rRNA_M_Locati	1132	G	962	1702	2664	0.409831	0	0.290773	511	1130	1641	0.52409	0.0126506	0.344008	655	475	1130	0.193467	0	0.162225	0.265669	0.0763061
18S_rRNA_M_Locati	1133	U	2740	2063	4803	0.292025	0	0	1709	1378	3087	0.256311	0	0	881	539	1420	0.0228478	0	0	0	0
18S_rRNA_M_Locati	1134	A	1338	2149	3487	0.0348401	0	0	630	1227	1857	0.25174	0	0.201199	532	813	1345	0.0427109	0	0.0409906	0.0807298	0.0868126
18S_rRNA_M_Locati	1135	G	632	1055	1687	0.935683	0.219246	0.483535	333	888	1221	0.802337	0.165785	0.445367	283	599	882	0.643161	0.104495	0.391687	0.440196	0.0376745
18S_rRNA_M_Locati	1136	U	612	1465	2077	0.525211	0.0887303	0.344462	368	1210	1578	0.3242	0	0.244944	318	677	995	0.515629	0.0826596	0.340434	0.309946	0.0459931
18S_rRNA_M_Locati	1137	U	874	1506	2380	0.352046	0	0.260461	501	933	1434	0.473566	0.031416	0.321526	532	858	1390	0.137231	0	0.120748	0.234245	0.0840374
18S_rRNA_M_Locati	1138	C	1376	1485	2861	0.0763413	0	0.0709497	861	1334	2195	0.123153	0	0	1209	585	1794	0.131965	0	0	0.0236499	0.033446
18S_rRNA_M_Locati	1139	C	1898	1707	3605	0.086809	0	0	1261	1370	2631	0.236031	0	0	1684	1056	2740	0.431221	0	0	0	0
18S_rRNA_M_Locati	1140	G	1539	1396	2935	0.158803	0	0.137081	1113	923	2036	0.00209458	0	0	1135	421	1556	0.104453	0	0.0946295	0.0772367	0.0572983
18S_rRNA_M_Locati	1141	A	1664	1267	2931	0.201194	0	0.167542	1207	641	1848	0.114434	0	0.102734	1277	373	1650	0.0457972	0	0.043817	0.104698	0.0505298
18S_rRNA_M_Locati	1142	C	1634	1745	3379	0.0831723	0	0.0768068	972	636	1608	0.315489	0	0.23994	1215	549	1764	0.0131885	0	0	0.105582	0.100046
18S_rRNA_M_Locati	1143	C	2873	2319	5192	0.265597	0	0	1983	972	2955	0.289697	0	0	1735	668	2403	0.288967	0	0	0	0
18S_rRNA_M_Locati	1144	G	1425	1355	2780	0.530061	0.0120434	0.346513	637	717	1354	0.722345	0.0614361	0.419576	701	354	1055	0.750316	0.132149	0.428907	0.398332	0.036839
18S_rRNA_M_Locati	1145	U	5260	2160	7420	0.48427	0	0	2961	961	3922	0.48319	0	0	1542	1017	2559	0.372895	0	0	0	0
18S_rRNA_M_Locati	1146	A	1989	1599	3588	0.232309	0	0.188558	916	696	1612	0.437329	0	0.304396	677	661	1338	0.247946	0	0.198802	0.230585	0.0523594
18S_rRNA_M_Locati	1147	A	2105	1578	3683	0.206089	0	0.170913	893	611	1504	0.527553	0	0.345508	670	725	1395	0.158883	0	0.137185	0.217868	0.0912993
18S_rRNA_M_Locati	1148	A	1850	1478	3328	0.377584	0	0.274151	773	682	1455	0.595658	0	0.37346	778	549	1327	0.198302	0	0.16559	0.271067	0.0848908
18S_rRNA_M_Locati	1149	C	4400	2833	7233	0.403285	0	0	2473	1553	4026	0.477941	0	0	1058	923	1981	0.243525	0	0	0	0
18S_rRNA_M_Locati	1150	G	2067	1525	3592	0.299598	0	0.230581	785	1221	2006	0.13314	0	0.117548	719	658	1377	0.0806402	0	0.0746728	0.140934	0.0657622
18S_rRNA_M_Locati	1151	A	1980	1783	3763	0.218178	0	0.179141	672	1240	1912	0.182082	0	0.154103	351	617	968	0.54832	0.0493505	0.354375	0.229206	0.0890959
18S_rRNA_M_Locati	1152	U	2175	3609	5784	0.299136	0	0	825	2203	3028	0.348102	0	0	321	1434	1755	0.252683	0	0	0	0
18S_rRNA_M_Locati	1153	G	1561	1533	3094	0.371165	0	0.270757	349	973	1322	0.604065	0	0.376761	408	709	1117	0.215524	0	0.17744	0.274986	0.0814275
18S_rRNA_M_Locati	1154	C	2739	1830	4569	0.130671	0	0	734	1285	2019	0.00192519	0	0.00192244	799	623	1422	0.0575935	0	0	0.000640814	0.000906248
18S_rRNA_M_Locati	1155	C	2958	3755	6713	0.476257	0	0	940	2045	2985	0.384092	0	0	660	1178	1838	0.305438	0	0	0	0
18S_rRNA_M_Locati	1156	G	1280	2356	3636	0.0358812	0	0	512	1213	1725	0.0732393	0	0.0682783	379	747	1126	0.194745	0	0.163123	0.0771336	0.0668882
18S_rRNA_M_Locati	1157	A	433	1464	1897	0.820548	0.131967	0.450845	347	875	1222	0.487181	0.0114103	0.327767	318	389	707	0.949969	0.179082	0.487524	0.422046	0.068326
18S_rRNA_M_Locati	1158	C	373	1839	2212	0.42777	0	0.299702	359	900	1259	0.371296	0	0.27092	308	682	990	0.367978	0	0.269193	0.279938	0.0139929
18S_rRNA_M_Locati	1159	C	654	1475	2129	0.339692	0	0.253649	417	778	1195	0.348959	0	0.258848	489	606	1095	0.257269	0	0.204774	0.23909	0.0243581
18S_rRNA_M_Locati	1160	C	889	2290	3179	0.194329	0	0	632	1305	1937	0.225777	0	0	977	1036	2013	0.354805	0	0	0	0
18S_rRNA_M_Locati	1161	G	645	838	1483	0.727718	0.0423716	0.421366	553	499	1052	0.506774	0	0.336543	727	538	1265	0.134053	0	0.118289	0.292066	0.127665
18S_rRNA_M_Locati	1162	C	823	2058	2881	0.254241	0	0	785	1685	2470	0.463667	0	0	690	1226	1916	0.279065	0	0	0	0
18S_rRNA_M_Locati	1163	G	280	1322	1602	0.349283	0.00476064	0.258985	281	785	1066	0.367104	0	0.268711	274	843	1117	0.332101	0	0.249474	0.259057	0.00785376
18S_rRNA_M_Locati	1164	A	210	1364	1574	0.383358	0.0245146	0.277249	161	859	1020	0.449929	0.0163821	0.310521	180	876	1056	0.465227	0.0205845	0.317717	0.301829	0.0176273
18S_rRNA_M_Locati	1165	U	171	1775	1946	0.0854249	0	0.078739	104	1081	1185	0.235207	0	0.190549	208	1927	2135	0.33158	0	0	0.0897627	0.0781809
18S_rRNA_M_Locati	1166	C	257	1598	1855	0.118756	0	0.106201	254	1003	1257	0.141945	0	0.124388	180	1078	1258	0.199762	0	0.166611	0.1324	0.0253048
18S_rRNA_M_Locati	1167	C	312	2245	2557	0.232095	0	0	373	1705	2078	0.340441	0	0	220	1814	2034	0.308206	0	0	0	0
18S_rRNA_M_Locati	1168	G	577	2172	2749	0.305976	0	0	483	780	1263	0.153745	0	0.133349	340	1500	1840	0.241457	0	0	0.0444495	0.0628611
18S_rRNA_M_Locati	1169	G	419	948	1367	0.470045	0.0226314	0.319908	343	948	1291	0.129807	0	0.114972	316	692	1008	0.417014	0	0.294496	0.243126	0.09121
18S_rRNA_M_Locati	1170	C	692	1717	2409	0.203057	0	0	531	1157	1688	0.143425	0	0	414	1042	1456	0.0636696	0	0	0	0
18S_rRNA_M_Locati	1171	G	598	1247	1845	0.228386	0	0.186005	381	959	1340	0.237816	0	0.192241	489	443	932	0.574181	0.0572854	0.364998	0.247748	0.082947
18S_rRNA_M_Locati	1172	G	323	918	1241	0.900823	0	0.474113	297	508	805	1.15529	0.122833	0.536335	608	242	850	0.664343	0.0680651	0.399444	0.469964	0.0559623
18S_rRNA_M_Locati	1173	C	735	1805	2540	0.0594692	0	0.0561519	597	1887	2484	0.363362	0	0	1215	782	1997	0.334001	0	0	0.0187173	0.0264703
18S_rRNA_M_Locati	1174	G	337	618	955	3.75921	0.151211	0.790055	376	492	868	1.17401	0.0851751	0.540306	570	351	921	0.942938	0	0.485587	0.605316	0.132526
18S_rRNA_M_Locati	1175	U	498	1572	2070	1.98984	0	0.665641	400	2035	2435	0.111189	0	0	729	411	1140	0.700166	0	0.412034	0.359225	0.274301
18S_rRNA_M_Locati	1176	U	475	1990	2465	1.81475	0	0.644821	433	968	1401	0.788009	0	0.440895	774	556	1330	0.516838	0	0.340903	0.475539	0.12647
18S_rRNA_M_Locati	1177	U	969	5963	6932	0.12757	0	0.113152	704	3273	3977	0.280752	0	0	1100	1196	2296	0.0762831	0	0	0.0377173	0.0533403
18S_rRNA_M_Locati	1178	A	605	1006	1611	4.73395	0.123596	0.825689	390	398	788	3.3705	0.144431	0.771417	478	533	1011	1.36032	0	0.57657	0.724559	0.106964
18S_rRNA_M_Locati	1179	U	2359	7436	9795	0.0729028	0	0	490	971	1461	1.51034	0	0.601811	774	1350	2124	0.110771	0	0.0997669	0.233859	0.26335
18S_rRNA_M_Locati	1180	U	21143	9030	30173	0.764183	0	0	2391	1249	3640	0.0275108	0	0	4512	3300	7812	0.785958	0	0	0	0
18S_rRNA_M_Locati	1181	C	25299	924	26223	0.712431	0	0	8274	358	8632	0.643172	0	0	2885	400	3285	0.352296	0	0	0	0
18S_rRNA_M_Locati	1182	C	2180	314	2494	2.91821	0	0.744858	2825	285	3110	0.178096	0	0.151214	467	269	736	2.09727	0	0.677432	0.524501	0.265385
18S_rRNA_M_Locati	1183	C	14376	411	14787	0.486938	0	0	10735	544	11279	0.771579	0	0	3023	391	3414	0.468134	0	0	0	0
18S_rRNA_M_Locati	1184	A	1758	267	2025	2.94578	0	0.746658	1192	313	1505	1.21521	0	0.548739	748	191	939	1.01855	0	0.50486	0.600086	0.105179
18S_rRNA_M_Locati	1185	U	2112	446	2558	1.74213	0	0.63541	2339	404	2743	0.0542517	0	0.0514777	528	339	867	0.983346	0	0.49609	0.394326	0.249013
18S_rRNA_M_Locati	1186	G	869	223	1092	4.40641	0	0.815172	735	220	955	1.89496	0.0235613	0.654808	173	306	479	2.24947	0	0.692701	0.720894	0.0684363
18S_rRNA_M_Locati	1187	A	537	163	700	4.56849	0.157174	0.820628	487	173	660	2.61177	0	0.72343	104	265	369	2.13066	0.138507	0.681167	0.741742	0.0583888
18S_rRNA_M_Locati	1188	C	565	235	800	1.92597	0.0879854	0.658514	565	173	738	1.40203	0	0.584014	246	275	521	1.003	0	0.501229	0.581252	0.0642411
18S_rRNA_M_Locati	1189	C	906	259	1165	0.804393	0.013488	0.446009	364	162	526	1.88535	0.0791362	0.653851	677	285	962	0.0655129	0	0.0615448	0.387135	0.245365
18S_rRNA_M_Locati	1190	C	1128	402	1530	0.149024	0	0	165	337	502	0.802364	0	0.445665	734	426	1160	0.237228	0	0	0.148555	0.210088
18S_rRNA_M_Locati	1191	G	431	296	727	1.09626	0.0415716	0.523303	38	196	234	3.11768	0.264298	0.757928	302	175	477	1.22896	0.170383	0.551879	0.611037	0.104521
18S_rRNA_M_Locati	1192	C	752	325	1077	0.449536	0	0.310323	409	322	731	0.187052	0	0.157759	631	344	975	0.0965505	0	0.0881317	0.185404	0.0927916
18S_rRNA_M_Locati	1193	C	1521	323	1844	0.134724	0	0	698	416	1114	0.223717	0	0	1151	245	1396	0.211	0	0	0	0
18S_rRNA_M_Locati	1194	G	1462	207	1669	0.104225	0	0.0944386	659	405	1064	0.0523735	0	0	1603	249	1852	0.371488	0	0	0.0314795	0.0445188
18S_rRNA_M_Locati	1195	G	1371	400	1771	0.133967	0	0.118199	340	464	804	0.427605	0	0.299787	977	332	1309	0.00876166	0	0	0.139329	0.123296
18S_rRNA_M_Locati	1196	G	808	307	1115	1.06557	0.203396	0.516096	245	465	710	0.838787	0.103499	0.456512	416	298	714	0.983372	0.154547	0.496158	0.489589	0.0247645
18S_rRNA_M_Locati	1197	C	3466	739	4205	0.407989	0	0	1483	825	2308	0.428622	0	0	1614	587	2201	0.384686	0	0	0	0
18S_rRNA_M_Locati	1198	A	1804	1048	2852	0.101227	0	0.0919511	747	689	1436	0.0978427	0	0.0891792	538	615	1153	0.351358	0	0.26017	0.1471	0.0799606
18S_rRNA_M_Locati	1199	G	1060	837	1897	1.08464	0.0518549	0.520433	319	609	928	0.997632	0.159238	0.499677	600	549	1149	0.434763	0.0189964	0.303205	0.441105	0.0978777
18S_rRNA_M_Locati	1200	C	1794	1705	3499	0.252073	0	0.20137	1009	1446	2455	0.250837	0	0	990	928	1918	0.164796	0	0	0.0671235	0.094927
18S_rRNA_M_Locati	1201	G	1143	1392	2535	1.03389	0.169223	0.508431	724	1068	1792	0.185239	0	0.156362	520	892	1412	0.195172	0	0.163397	0.276063	0.164334
18S_rRNA_M_Locati	1202	U	1099	2450	3549	0.557737	0.0433741	0.358108	528	1602	2130	0.0594869	0	0.0561718	569	961	1530	0.103309	0	0.0936914	0.169324	0.134367
18S_rRNA_M_Locati	1203	U	1598	7990	9588	0.450694	0	0	730	2224	2954	0.212668	0	0	406	2360	2766	0.433683	0	0	0	0
18S_rRNA_M_Locati	1204	G	981	6054	7035	0.182552	0	0	573	1399	1972	0.264296	0	0.20913	172	1385	1557	0.0413493	0	0.0397319	0.0829539	0.0906823
18S_rRNA_M_Locati	1205	C	706	10008	10714	0.49668	0	0	914	2748	3662	0.36047	0	0	94	2160	2254	0.342005	0	0	0	0
18S_rRNA_M_Locati	1206	G	827	7520	8347	0.317026	0	0	393	2252	2645	0.0467288	0	0	293	1333	1626	0.084805	0	0	0	0
18S_rRNA_M_Locati	1207	G	936	7289	8225	0.315925	0	0	550	2886	3436	0.277584	0	0	153	1594	1747	0.205848	0	0	0	0
18S_rRNA_M_Locati	1208	G	770	3657	4427	0.335587	0	0.251308	550	1951	2501	0.0516476	0	0.0491298	73	916	989	0.399888	0.0294112	0.285863	0.195434	0.10441
18S_rRNA_M_Locati	1209	A	747	2966	3713	0.566203	0.0990856	0.361575	618	1919	2537	0.0716969	0	0.0669249	62	857	919	0.428128	0.022551	0.300011	0.242837	0.126902
18S_rRNA_M_Locati	1210	A	595	3002	3597	0.461902	0.0205694	0.31602	531	1627	2158	0.239087	0	0.193026	54	652	706	0.699764	0.116161	0.412026	0.307024	0.0896322
18S_rRNA_M_Locati	1211	A	352	1957	2309	1.17299	0.194275	0.539913	497	982	1479	0.841096	0.129949	0.457013	44	565	609	0.910929	0.165849	0.477104	0.491343	0.0353096
18S_rRNA_M_Locati	1212	C	409	3092	3501	0.22681	0	0.184921	420	1548	1968	0.291298	0	0.225674	38	792	830	0.285987	0	0.222596	0.211064	0.0185284
18S_rRNA_M_Locati	1213	C	735	4358	5093	0.273878	0	0	985	2716	3701	0.382667	0	0	99	1339	1438	0.316655	0	0	0	0
18S_rRNA_M_Locati	1214	A	983	3322	4305	0.206531	0	0	1190	1705	2895	0.218198	0	0	149	752	901	0.149076	0	0.129861	0.043287	0.061217
18S_rRNA_M_Locati	1215	C	624	4770	5394	0.424257	0	0	1844	2449	4293	0.528958	0	0	133	1054	1187	0.121427	0	0	0	0
18S_rRNA_M_Locati	1216	G	210	2750	2960	0.0797553	0	0.0738874	309	1057	1366	0.659693	0.0735509	0.397654	56	907	963	0.160281	0	0.138264	0.203268	0.139942
18S_rRNA_M_Locati	1217	A	100	2868	2968	0.0199618	0	0.0195776	120	1499	1619	0.344904	0	0.25657	24	1133	1157	0.0240837	0	0	0.0920493	0.116608
18S_rRNA_M_Locati	1218	G	448	1148	1596	0.908913	0.2156	0.476298	420	820	1240	0.761572	0.122086	0.432523	87	931	1018	0.135634	0	0.119538	0.342786	0.158869
18S_rRNA_M_Locati	1219	U	720	1067	1787	0.557482	0.0458846	0.358067	703	918	1621	0.276469	0	0.216694	161	1094	1255	0.101734	0	0	0.191587	0.147254
18S_rRNA_M_Locati	1220	C	801	1337	2138	0.135894	0	0.119686	769	773	1542	0.218651	0	0.179516	377	947	1324	0.20244	0	0	0.0997338	0.0746326
18S_rRNA_M_Locati	1221	U	993	1375	2368	0.081014	0	0	986	856	1842	0.0896003	0	0	521	928	1449	0.300644	0	0	0	0
18S_rRNA_M_Locati	1222	C	1114	959	2073	0.0663399	0	0	1217	764	1981	0.277256	0	0	636	837	1473	0.348711	0	0	0	0
18S_rRNA_M_Locati	1223	U	640	2061	2701	0.345863	0	0	1475	790	2265	0.417265	0	0	295	697	992	0.0357167	0	0	0	0
18S_rRNA_M_Locati	1224	G	472	1495	1967	0.072194	0	0	1309	539	1848	0.310282	0	0	192	392	584	0.61736	0.13467	0.382112	0.127371	0.180129
18S_rRNA_M_Locati	1225	G	344	686	1030	0.902392	0.174059	0.474588	907	620	1527	0.184577	0	0	173	574	747	0.158779	0	0.137181	0.203923	0.199415
18S_rRNA_M_Locati	1226	G	51	769	820	1.46786	0.294668	0.595084	69	443	512	1.49142	0.310262	0.599092	11	275	286	1.9348	0.367625	0.660045	0.618074	0.0297236
18S_rRNA_M_Locati	1227	C	79	1362	1441	0.380243	0	0.275629	20	231	251	3.97288	0.543349	0.799547	3	679	682	0.0647145	0	0.0608648	0.37868	0.310245
18S_rRNA_M_Locati	1228	U	453	717	1170	0.802951	0.172202	0.445565	150	201	351	2.51572	0.357556	0.716142	106	641	747	0.0916518	0	0	0.387236	0.295259
18S_rRNA_M_Locati	1229	C	888	1173	2061	0.0413191	0	0.0396981	503	90	593	1.16092	0.0811064	0.537654	400	188	588	0.105584	0	0.0956474	0.224333	0.222726
18S_rRNA_M_Locati	1230	C	838	2402	3240	0.365288	0	0	726	244	970	0.354091	0	0.261696	350	480	830	0.291429	0	0	0.0872321	0.123365
18S_rRNA_M_Locati	1231	G	849	1778	2627	0.149395	0	0	752	633	1385	0.0239618	0	0.0234176	188	399	587	0.0485072	0	0.0463382	0.023252	0.0189179
18S_rRNA_M_Locati	1232	G	1363	1311	2674	0.129533	0	0	1172	183	1355	0.134333	0	0.118502	226	144	370	0.715933	0.0891874	0.417883	0.178795	0.175847
18S_rRNA_M_Locati	1233	G	1912	497	2409	0.0454495	0	0.0434909	1268	265	1533	0.177937	0	0.151142	413	56	469	0.448723	0.0102922	0.310193	0.168275	0.109552
18S_rRNA_M_Locati	1234	G	2557	562	3119	0.213187	0	0	1626	594	2220	0.146526	0	0	925	42	967	0.349931	0	0	0	0
18S_rRNA_M_Locati	1235	G	2425	855	3280	0.255403	0	0	1999	1083	3082	0.375439	0	0	615	45	660	0.00443772	0	0.00442478	0.00147493	0.00208586
18S_rRNA_M_Locati	1236	G	1329	572	1901	0.356502	0.0440267	0.262912	1330	1234	2564	0.179905	0	0	275	77	352	1.15087	0.158528	0.535777	0.266229	0.218742
18S_rRNA_M_Locati	1237	A	1837	741	2578	0.0870449	0	0	1821	1232	3053	0.323143	0	0	499	144	643	0.181781	0	0.154022	0.0513405	0.0726065
18S_rRNA_M_Locati	1238	G	1384	505	1889	0.222446	0	0.182046	944	709	1653	0.338486	0	0.253001	637	46	683	0.178655	0	0.151764	0.195604	0.0424274
18S_rRNA_M_Locati	1239	U	2568	715	3283	0.363855	0	0	2756	1146	3902	0.483079	0	0	1248	59	1307	0.334888	0	0	0	0
18S_rRNA_M_Locati	1240	A	1177	288	1465	0.493073	0.047387	0.330391	903	397	1300	0.728559	0.0695615	0.421671	621	23	644	0.566787	0	0.36211	0.371391	0.0378383
18S_rRNA_M_Locati	1241	U	1181	477	1658	0.287181	0	0.223213	844	443	1287	0.794479	0.0330869	0.442927	552	48	600	0.876595	0.075578	0.467534	0.377891	0.109835
18S_rRNA_M_Locati	1242	G	1683	726	2409	0.196196	0	0	1151	864	2015	0.0582617	0	0.05508	1476	81	1557	0.288525	0	0	0.01836	0.0259649
18S_rRNA_M_Locati	1243	G	847	368	1215	0.676754	0.0525127	0.403808	589	587	1176	0.842953	0	0.457603	1033	64	1097	0.142329	0	0.124695	0.328702	0.145917
18S_rRNA_M_Locati	1244	U	732	394	1126	0.816869	0.0909227	0.449822	758	683	1441	0.471529	0	0.320586	893	109	1002	0.394284	0	0.282988	0.351132	0.0714526
18S_rRNA_M_Locati	1245	U	1418	1143	2561	0.271992	0	0	1709	1657	3366	0.436333	0	0	1884	520	2404	0.457427	0	0	0	0
18S_rRNA_M_Locati	1246	G	738	590	1328	0.453909	0	0.31236	467	683	1150	0.784786	0	0.439923	726	277	1003	0.498484	0	0.33288	0.361721	0.0559279
18S_rRNA_M_Locati	1247	C	2380	1022	3402	0.492356	0	0	3018	1321	4339	0.602243	0	0	1847	459	2306	0.390989	0	0	0	0
18S_rRNA_M_Locati	1248	A	1088	422	1510	0.285396	0	0.222144	960	577	1537	0.321933	0	0.243652	1128	261	1389	0.0929976	0	0.085141	0.183646	0.0702046
18S_rRNA_M_Locati	1249	A	1026	508	1534	0.228527	0	0.186116	952	449	1401	0.410144	0	0.291	867	344	1211	0.227814	0	0.185669	0.220928	0.0495484
18S_rRNA_M_Locati	1250	A	1842	788	2630	0.329237	0	0	1544	862	2406	0.242049	0	0	1810	534	2344	0.437669	0	0	0	0
18S_rRNA_M_Locati	1251	G	967	433	1400	0.373083	0.0197189	0.271853	808	431	1239	0.537437	0	0.34975	914	279	1193	0.208878	0	0.172906	0.264837	0.0723666
18S_rRNA_M_Locati	1252	C	817	687	1504	0.227183	0	0.185226	707	838	1545	0.119311	0	0.106655	1142	247	1389	0.0463709	0	0	0.0972938	0.0759075
18S_rRNA_M_Locati	1253	U	1090	916	2006	0.0973094	0	0	911	1094	2005	0.163421	0	0	1052	234	1286	0.0184667	0	0.0181457	0.00604858	0.00855398
18S_rRNA_M_Locati	1254	G	769	883	1652	0.150373	0	0.130786	546	771	1317	0.306373	0	0.234658	534	217	751	0.75526	0.13188	0.43061	0.265351	0.124312
18S_rRNA_M_Locati	1255	A	736	793	1529	0.295011	0	0.227921	544	781	1325	0.319683	0	0.242381	588	222	810	0.597287	0.0774788	0.374227	0.28151	0.0658266
18S_rRNA_M_Locati	1256	A	680	916	1596	0.27551	0	0.216106	532	787	1319	0.349966	0	0.259386	544	304	848	0.538987	0.0746359	0.35049	0.275327	0.0560082
18S_rRNA_M_Locati	1257	A	1230	706	1936	0.0912408	0	0.0836515	766	674	1440	0.265703	0	0.21004	1372	219	1591	0.229181	0	0	0.0978973	0.0863382
18S_rRNA_M_Locati	1258	C	947	777	1724	0.363156	0.0245711	0.266522	724	772	1496	0.327789	0	0.246993	1005	263	1268	0.0443832	0	0.0425291	0.185348	0.101302
18S_rRNA_M_Locati	1259	U	877	1229	2106	0.172742	0	0.147357	720	1214	1934	0.0629917	0	0.0592877	924	242	1166	0.174474	0	0.148663	0.118436	0.0418276
18S_rRNA_M_Locati	1260	U	2664	1585	4249	0.429278	0	0	2450	1421	3871	0.481448	0	0	1362	408	1770	0.216293	0	0	0	0
18S_rRNA_M_Locati	1261	A	1135	1058	2193	0.286174	0	0.222579	808	958	1766	0.3444	0	0.256282	900	321	1221	0.251991	0	0.201404	0.226755	0.0225975
18S_rRNA_M_Locati	1262	A	971	1095	2066	0.448718	0.0326845	0.309838	684	883	1567	0.610551	0.0504284	0.379245	1102	376	1478	0.0504996	0	0.0481029	0.245729	0.142586
18S_rRNA_M_Locati	1263	A	1733	2109	3842	0.221444	0	0	1164	1598	2762	0.0711023	0	0	1521	584	2105	0.266799	0	0	0	0
18S_rRNA_M_Locati	1264	G	2072	1949	4021	0.234007	0	0	1492	1930	3422	0.242244	0	0	1152	631	1783	0.107405	0	0	0	0
18S_rRNA_M_Locati	1265	G	1577	1312	2889	0.132949	0	0.117383	1128	1342	2470	0.116565	0	0.104434	840	546	1386	0.208916	0	0.172916	0.131578	0.0297046
18S_rRNA_M_Locati	1266	A	2827	1333	4160	0.21336	0	0	2750	1228	3978	0.297727	0	0	1569	696	2265	0.263352	0	0	0	0
18S_rRNA_M_Locati	1267	A	1577	1479	3056	0.0991895	0	0.0902656	1054	1335	2389	0.242957	0	0.195533	870	672	1542	0.135054	0	0.119053	0.13495	0.044421
18S_rRNA_M_Locati	1268	U	1574	1537	3111	0.0818088	0	0.0756447	1283	1348	2631	0.129424	0	0.114632	517	747	1264	0.429548	0.0544722	0.300644	0.16364	0.0981753
18S_rRNA_M_Locati	1269	U	2052	2045	4097	0.216002	0	0	2119	1455	3574	0.193225	0	0	473	1212	1685	0.0661592	0	0.0620883	0.0206961	0.0292687
18S_rRNA_M_Locati	1270	G	1666	1232	2898	0.10156	0	0.0922253	1351	1018	2369	0.25285	0	0.201888	755	813	1568	0.176007	0	0.149746	0.147953	0.0447876
18S_rRNA_M_Locati	1271	A	1613	755	2368	0.308316	0	0.235735	1233	725	1958	0.496137	0	0.331725	1180	696	1876	0.00316107	0	0	0.189153	0.139374
18S_rRNA_M_Locati	1272	C	3290	1508	4798	0.430249	0	0	4394	1285	5679	0.5677	0	0	1707	1166	2873	0.378941	0	0	0	0
18S_rRNA_M_Locati	1273	G	1805	1350	3155	0.140815	0	0	1752	1270	3022	0.148017	0	0	662	882	1544	0.22128	0	0.181283	0.0604277	0.0854577
18S_rRNA_M_Locati	1274	G	1095	1255	2350	0.148325	0	0.129214	1068	737	1805	0.480103	0	0.324493	283	1302	1585	0.189414	0	0.159335	0.204347	0.0858412
18S_rRNA_M_Locati	1275	A	672	1078	1750	0.485976	0.0524811	0.327167	838	1061	1899	0.329047	0	0.247679	190	1862	2052	0.122482	0	0	0.191616	0.139325
18S_rRNA_M_Locati	1276	A	242	1416	1658	0.488112	0.0367083	0.32814	390	1598	1988	0.205374	0	0.170453	83	2307	2390	0.28361	0	0	0.166198	0.133997
18S_rRNA_M_Locati	1277	G	414	1575	1989	0.211508	0	0.174655	510	1530	2040	0.173107	0	0.147624	114	2291	2405	0.295003	0	0	0.107426	0.0767592
18S_rRNA_M_Locati	1278	G	744	1716	2460	0.0704727	0	0	825	1366	2191	0.0570864	0	0.0540268	248	1251	1499	0.138467	0	0.121697	0.0585746	0.0497865
18S_rRNA_M_Locati	1279	G	726	805	1531	0.473093	0.0516918	0.321298	688	737	1425	0.568677	0.0844283	0.362682	337	706	1043	0.591049	0.088047	0.371708	0.351896	0.0219474
18S_rRNA_M_Locati	1280	C	1241	1568	2809	0.221645	0	0	1618	1426	3044	0.265156	0	0	550	1041	1591	0.0359157	0	0.0346915	0.0115638	0.0163537
18S_rRNA_M_Locati	1281	A	554	971	1525	0.613106	0.0783812	0.380232	611	729	1340	0.967843	0.127166	0.492016	259	535	794	1.26662	0.235239	0.559126	0.477125	0.073788
18S_rRNA_M_Locati	1282	C	827	1740	2567	0.02124	0	0	984	1428	2412	0.137956	0	0.121276	708	480	1188	0.515092	0.0321424	0.340163	0.153813	0.140764
18S_rRNA_M_Locati	1283	C	1410	1814	3224	0.211745	0	0	1790	1416	3206	0.131158	0	0	977	1084	2061	0.178241	0	0	0	0
18S_rRNA_M_Locati	1284	A	677	824	1501	0.895968	0.166109	0.472731	832	632	1464	1.14635	0.170807	0.534262	382	642	1024	0.823892	0.141804	0.451964	0.486319	0.0349451
18S_rRNA_M_Locati	1285	C	1184	1057	2241	0.253955	0	0.202595	1867	694	2561	0.215166	0	0.177124	900	885	1785	0.0409854	0	0.039393	0.139704	0.0716888
18S_rRNA_M_Locati	1286	C	3007	1281	4288	0.374827	0	0	5056	1004	6060	0.525192	0	0	1754	1288	3042	0.394154	0	0	0	0
18S_rRNA_M_Locati	1287	A	2514	1321	3835	0.275295	0	0	3210	1178	4388	0.291253	0	0	1523	1276	2799	0.318845	0	0	0	0
18S_rRNA_M_Locati	1288	G	2603	1236	3839	0.269502	0	0	3264	1307	4571	0.325224	0	0	1271	1203	2474	0.212889	0	0	0	0
18S_rRNA_M_Locati	1289	G	1666	744	2410	0.217899	0	0.178975	1735	769	2504	0.295653	0	0.228259	651	801	1452	0.393936	0	0.282747	0.229993	0.0423823
18S_rRNA_M_Locati	1290	A	1622	1278	2900	0.0474587	0	0	1758	1308	3066	0.0151723	0	0	1010	1384	2394	0.249756	0	0	0	0
18S_rRNA_M_Locati	1291	G	1227	935	2162	0.321842	0.0194587	0.243565	1081	911	1992	0.544394	0.0332408	0.352612	872	867	1739	0.0378097	0	0.0364524	0.210876	0.131125
18S_rRNA_M_Locati	1292	U	990	1591	2581	0.0633574	0	0.0596042	1508	1666	3174	0.124315	0	0	761	1675	2436	0.344153	0	0	0.0198681	0.0280977
18S_rRNA_M_Locati	1293	G	874	2237	3111	0.207351	0	0	917	2110	3027	0.19436	0	0	326	1196	1522	0.0302838	0	0	0	0
18S_rRNA_M_Locati	1294	G	794	1323	2117	0.138857	0	0.121978	720	913	1633	0.444281	0.0499961	0.307744	226	565	791	0.713173	0.127907	0.416595	0.282106	0.121636
18S_rRNA_M_Locati	1295	A	450	2065	2515	0.0815404	0	0	514	1611	2125	0.0417895	0	0.0401313	133	768	901	0.329552	0	0.248074	0.0960683	0.108725
18S_rRNA_M_Locati	1296	G	658	1075	1733	0.372357	0.0291366	0.271441	664	1032	1696	0.319656	0	0.242335	112	466	578	0.99242	0.139977	0.49853	0.337435	0.114529
18S_rRNA_M_Locati	1297	C	969	1692	2661	0.168608	0	0	913	1124	2037	0.0334751	0	0.0324062	297	643	940	0.0494982	0	0.0472115	0.0265392	0.0197154
18S_rRNA_M_Locati	1298	C	1038	1024	2062	0.106856	0	0.0965826	1154	427	1581	0.365571	0	0.26783	578	352	930	0.0170187	0	0	0.121471	0.110748
18S_rRNA_M_Locati	1299	U	975	165	1140	1.02077	0.191883	0.505359	1072	49	1121	0.870489	0.0781203	0.465602	323	49	372	1.27775	0.200715	0.561631	0.510864	0.0393963
18S_rRNA_M_Locati	1300	G	1110	510	1620	0.408993	0	0.2904	818	700	1518	0.388882	0	0.280129	419	112	531	0.530994	0.0156476	0.347256	0.305928	0.0295223
18S_rRNA_M_Locati	1301	C	1784	1818	3602	0.423619	0	0	1676	2429	4105	0.548198	0	0	586	510	1096	0.280583	0	0	0	0
18S_rRNA_M_Locati	1302	G	933	1509	2442	0.09849	0	0	662	1933	2595	0.218109	0	0	307	680	987	0.157299	0	0	0	0
18S_rRNA_M_Locati	1303	G	756	1327	2083	0.103663	0	0.093967	598	958	1556	0.452187	0	0.311521	299	525	824	0.116162	0	0.104186	0.169891	0.100234
18S_rRNA_M_Locati	1304	C	562	1901	2463	0.100442	0	0	374	1832	2206	0.0101294	0	0.0100323	176	723	899	0.047037	0	0.0449717	0.0183347	0.0192754
18S_rRNA_M_Locati	1305	U	473	650	1123	1.11693	0.178401	0.52784	340	512	852	1.92662	0.304731	0.658573	82	137	219	3.76348	0.561694	0.790824	0.659079	0.107363
18S_rRNA_M_Locati	1306	U	1238	2317	3555	0.392573	0	0	743	2828	3571	0.368735	0	0	167	1064	1231	0.180934	0	0	0	0
18S_rRNA_M_Locati	1307	A	880	1159	2039	0.143584	0	0.12561	529	1251	1780	0.398209	0	0.284914	279	1099	1378	0.235896	0	0	0.136841	0.116586
18S_rRNA_M_Locati	1308	A	719	1329	2048	0.0831029	0	0.0767613	439	1408	1847	0.287103	0	0.223155	239	985	1224	0.11395	0	0	0.0999722	0.0925694
18S_rRNA_M_Locati	1309	U	919	1825	2744	0.258567	0	0	426	3376	3802	0.462126	0	0	341	1283	1624	0.376014	0	0	0	0
18S_rRNA_M_Locati	1310	U	573	1216	1789	0.275866	0	0.216313	378	2202	2580	0.116673	0	0	307	818	1125	0.00123347	0	0.00123305	0.0725154	0.101682
18S_rRNA_M_Locati	1311	U	625	1432	2057	0.0822967	0	0.0760731	516	2627	3143	0.311231	0	0	159	758	917	0.267429	0	0.211183	0.095752	0.0873307
18S_rRNA_M_Locati	1312	G	556	1805	2361	0.0650908	0	0	282	1695	1977	0.153606	0	0.133212	208	1102	1310	0.131587	0	0	0.0444038	0.0627965
18S_rRNA_M_Locati	1313	A	522	1321	1843	0.318523	0	0.241675	254	1511	1765	0.3396	0	0.253616	218	975	1193	0.0388703	0	0	0.165097	0.116843
18S_rRNA_M_Locati	1314	C	444	1305	1749	0.43247	0	0.302026	240	1492	1732	0.36055	0	0.265116	148	809	957	0.192879	0	0.161833	0.242992	0.0593328
18S_rRNA_M_Locati	1315	U	508	306	814	2.39286	0.352838	0.705518	201	63	264	9.19883	0.723179	0.902283	259	52	311	2.92187	0.494409	0.745629	0.784477	0.084896
18S_rRNA_M_Locati	1316	C	2632	2496	5128	0.533359	0	0	1681	1924	3605	0.347384	0	0	988	932	1920	0.448054	0	0	0	0
18S_rRNA_M_Locati	1317	A	1004	902	1906	0.538059	0	0.349949	551	1224	1775	0.495771	0	0.331573	457	673	1130	0.0814422	0	0.0753705	0.252298	0.125331
18S_rRNA_M_Locati	1318	A	828	706	1534	1.04111	0.0563838	0.510233	495	1007	1502	0.839602	0.0103265	0.456569	435	334	769	0.746739	0.0978923	0.427823	0.464875	0.0341525
18S_rRNA_M_Locati	1319	C	4711	1733	6444	0.590399	0	0	3794	1718	5512	0.565611	0	0	825	572	1397	0.0509617	0	0	0	0
18S_rRNA_M_Locati	1320	A	1273	971	2244	0.426993	0	0.299319	805	905	1710	0.686447	0	0.407179	478	476	954	0.480582	3.79354e-05	0.32482	0.343772	0.0460276
18S_rRNA_M_Locati	1321	C	2110	1426	3536	0.138224	0	0	2864	2087	4951	0.496868	0	0	983	404	1387	0.000592379	0	0	0	0
18S_rRNA_M_Locati	1322	G	1995	1512	3507	0.12405	0	0	1113	2232	3345	0.190722	0	0	1346	529	1875	0.265547	0	0	0	0
18S_rRNA_M_Locati	1323	G	1662	1709	3371	0.152132	0	0	1096	1653	2749	0.0557414	0	0	1513	624	2137	0.403186	0	0	0	0
18S_rRNA_M_Locati	1324	G	1750	1722	3472	0.206287	0	0	997	1767	2764	0.109299	0	0	1267	710	1977	0.373329	0	0	0	0
18S_rRNA_M_Locati	1325	G	1402	963	2365	0.186461	0	0.157213	953	1106	2059	0.192956	0	0.161812	1002	672	1674	0.275728	0	0	0.106342	0.0752184
18S_rRNA_M_Locati	1326	A	1483	1083	2566	0.0650089	0	0	773	823	1596	0.345029	0	0.256641	674	410	1084	0.0690323	0	0.0646303	0.10709	0.10899
18S_rRNA_M_Locati	1327	A	889	754	1643	0.430042	0.0718521	0.300848	663	488	1151	0.763301	0.0395692	0.433095	502	195	697	0.567924	0.0800426	0.362545	0.365496	0.05403
18S_rRNA_M_Locati	1328	C	1233	736	1969	0.0887084	0	0.0815184	1091	612	1703	0.015519	0	0	633	206	839	0.166997	0	0.143246	0.0749215	0.0586657
18S_rRNA_M_Locati	1329	C	891	846	1737	0.217875	0	0.178982	1072	576	1648	0.0604946	0	0	301	183	484	0.905979	0.0804913	0.47585	0.218277	0.196242
18S_rRNA_M_Locati	1330	U	722	939	1661	0.210489	0	0.173974	633	534	1167	0.270491	0	0.213046	192	283	475	0.706303	0	0.414448	0.267156	0.105365
18S_rRNA_M_Locati	1331	C	1033	1103	2136	0.151921	0	0	1524	673	2197	0.441983	0	0	145	377	522	0.335075	0	0.251339	0.0837795	0.118482
18S_rRNA_M_Locati	1332	A	324	592	916	1.07563	0.171643	0.518492	279	267	546	1.443	0.257955	0.59111	74	247	321	1.01656	0.0876157	0.504884	0.538162	0.0378497
18S_rRNA_M_Locati	1333	C	351	729	1080	0.678693	0.025388	0.404521	215	226	441	1.87373	0.276001	0.652534	68	215	283	1.26745	0.181402	0.559845	0.538967	0.102321
18S_rRNA_M_Locati	1334	C	886	1140	2026	0.118149	0	0	454	536	990	0.21748	0	0.178779	728	221	949	0.33607	0	0	0.059593	0.0842773
18S_rRNA_M_Locati	1335	C	1254	2403	3657	0.547597	0	0	690	1231	1921	0.444138	0	0	865	298	1163	0.441399	0	0	0	0
18S_rRNA_M_Locati	1336	G	1043	729	1772	0.0603748	0	0.0569675	466	781	1247	0.12183	0	0	511	195	706	0.0565142	0	0.0535629	0.0368435	0.0260893
18S_rRNA_M_Locati	1337	G	585	412	997	0.966032	0.0754085	0.491612	288	505	793	0.408326	0	0.290197	192	99	291	1.87215	0.245366	0.652606	0.478138	0.14826
18S_rRNA_M_Locati	1338	C	902	670	1572	0.239747	0	0.193483	603	505	1108	0.0476305	0	0	258	171	429	1.13592	0.134065	0.532397	0.24196	0.220036
18S_rRNA_M_Locati	1339	C	570	552	1122	0.856674	0.0920673	0.461624	272	285	557	1.05426	0.134809	0.513655	680	127	807	0.201141	0	0.167631	0.38097	0.152341
18S_rRNA_M_Locati	1340	C	1534	1372	2906	0.29406	0	0	576	854	1430	0.187957	0	0	1300	340	1640	0.380513	0	0	0	0
18S_rRNA_M_Locati	1341	G	1484	1192	2676	0.193359	0	0	422	829	1251	0.000922968	0	0.000922853	800	460	1260	0.0920081	0	0	0.000307618	0.000435037
18S_rRNA_M_Locati	1342	G	679	1050	1729	0.296904	0	0.229035	243	594	837	0.531398	0	0.347272	480	456	936	0.326467	0	0.246316	0.274208	0.0521438
18S_rRNA_M_Locati	1343	A	607	943	1550	0.528698	0.0330984	0.345995	268	574	842	0.588243	0.031924	0.37065	473	456	929	0.435914	0	0.303807	0.340151	0.0275998
18S_rRNA_M_Locati	1344	C	1470	1494	2964	0.206749	0	0	618	1138	1756	0.255499	0	0	987	817	1804	0.2486	0	0	0	0
18S_rRNA_M_Locati	1345	A	951	1035	1986	0.345261	0	0.256746	300	621	921	0.640829	0.0483265	0.39081	934	445	1379	0.118696	0	0.106171	0.251242	0.116269
18S_rRNA_M_Locati	1346	C	1668	2212	3880	0.318329	0	0	558	2003	2561	0.432115	0	0	1179	1045	2224	0.320155	0	0	0	0
18S_rRNA_M_Locati	1347	G	1289	1609	2898	0.025503	0	0	525	1489	2014	0.208111	0	0	731	994	1725	0.0856959	0	0	0	0
18S_rRNA_M_Locati	1348	G	914	1384	2298	0.287647	0	0.223465	320	724	1044	0.728527	0.092965	0.421706	321	1119	1440	0.122346	0	0.109076	0.251416	0.129152
18S_rRNA_M_Locati	1349	A	1252	1504	2756	0.0387821	0	0.0373472	426	1200	1626	0.067814	0	0.0635439	484	1044	1528	0.0195189	0	0.0191575	0.0400162	0.0182187
18S_rRNA_M_Locati	1350	A	1263	1457	2720	0.0993671	0	0.0904159	453	1017	1470	0.272611	0	0.214329	699	1073	1772	0.128997	0	0	0.101581	0.0878547
18S_rRNA_M_Locati	1351	A	2258	2223	4481	0.380423	0	0	863	1501	2364	0.244012	0	0	1095	1236	2331	0.399743	0	0	0	0
18S_rRNA_M_Locati	1352	G	1746	2004	3750	0.245244	0	0	887	1427	2314	0.209489	0	0	737	754	1491	0.0423816	0	0	0	0
18S_rRNA_M_Locati	1353	G	1926	1227	3153	0.0282428	0	0.0274755	1238	989	2227	0.058458	0	0	860	509	1369	0.0333009	0	0.0322505	0.0199087	0.0142119
18S_rRNA_M_Locati	1354	A	1573	1387	2960	0.128992	0	0.114288	699	1787	2486	0.129268	0	0	753	399	1152	0.222203	0	0.181934	0.0987408	0.0750836
18S_rRNA_M_Locati	1355	U	63	90	153	23.4602	0.857324	0.959372	30	176	206	11.3589	0.744089	0.919446	24	25	49	29.7553	0.914876	0.968115	0.948978	0.0211849
18S_rRNA_M_Locati	1356	U	2234	1444	3678	0.0548579	0	0	1296	1398	2694	0.115729	0	0	830	761	1591	0.132929	0	0	0	0
18S_rRNA_M_Locati	1357	G	1601	1050	2651	0.409515	0	0.290614	955	723	1678	0.56392	0	0.360719	434	416	850	0.769774	0.0742934	0.435245	0.362193	0.0590547
18S_rRNA_M_Locati	1358	A	1327	563	1890	1.10071	0.000647507	0.524103	815	649	1464	0.944619	0.0115308	0.485931	584	372	956	0.609416	0.0854727	0.378903	0.462979	0.0614593
18S_rRNA_M_Locati	1359	C	9819	1047	10866	0.726405	0	0	6293	911	7204	0.689703	0	0	2031	552	2583	0.461034	0	0	0	0
18S_rRNA_M_Locati	1360	A	2857	806	3663	0.037218	0	0.0358919	2299	567	2866	0.0456962	0	0	1288	394	1682	0.0816135	0	0	0.011964	0.0169196
18S_rRNA_M_Locati	1361	G	2664	473	3137	0.247617	0	0.198523	1961	412	2373	0.200314	0	0.166943	1349	365	1714	0.0549595	0	0	0.121822	0.0871005
18S_rRNA_M_Locati	1362	A	2732	831	3563	0.115205	0	0.103329	2138	366	2504	0.179734	0	0.152403	1331	514	1845	0.0797881	0	0	0.0852441	0.0635188
18S_rRNA_M_Locati	1363	U	2588	1049	3637	0.055073	0	0.0522119	2011	433	2444	0.182904	0	0.154676	1369	706	2075	0.201702	0	0	0.0689627	0.0642476
18S_rRNA_M_Locati	1364	U	3330	1614	4944	0.268493	0	0	3872	586	4458	0.403641	0	0	1335	973	2308	0.273918	0	0	0	0
18S_rRNA_M_Locati	1365	G	1712	733	2445	0.582434	0	0.368157	1375	311	1686	0.755839	0.0386383	0.430617	639	528	1167	0.559123	0.128969	0.358811	0.385862	0.031876
18S_rRNA_M_Locati	1366	A	1801	557	2358	0.449847	0.0696153	0.310363	1294	275	1569	0.723645	0.111009	0.419989	957	461	1418	0.200548	0	0.167145	0.299166	0.103526
18S_rRNA_M_Locati	1367	C	3088	1342	4430	0.297969	0	0	3134	527	3661	0.33803	0	0	1007	1004	2011	0.214248	0	0	0	0
18S_rRNA_M_Locati	1368	G	2172	892	3064	0.0539097	0	0.051168	2198	590	2788	0.102518	0	0	694	757	1451	0.0894399	0	0.082149	0.044439	0.033873
18S_rRNA_M_Locati	1369	G	1604	763	2367	0.379293	0.0673272	0.275075	1414	310	1724	0.506957	0.076363	0.33654	695	496	1191	0.29588	0	0.228471	0.280029	0.0442577
18S_rRNA_M_Locati	1370	C	1845	1132	2977	0.0772815	0	0.0717599	1927	581	2508	0.00369337	0	0	592	1379	1971	0.30173	0	0	0.02392	0.033828
18S_rRNA_M_Locati	1371	U	2085	1301	3386	0.0786701	0	0	1898	503	2401	0.00619391	0	0.00615833	810	837	1647	0.185761	0	0	0.00205278	0.00290307
18S_rRNA_M_Locati	1372	C	1873	1255	3128	0.080679	0	0.0746779	2013	662	2675	0.0461883	0	0	691	550	1241	0.149096	0	0.129842	0.0681733	0.0532069
18S_rRNA_M_Locati	1373	U	1692	1105	2797	0.250695	0	0.200502	1633	615	2248	0.181552	0	0.153714	433	549	982	0.491794	0.0621886	0.329891	0.228035	0.0745126
18S_rRNA_M_Locati	1374	U	1249	1766	3015	0.160614	0	0.138426	1181	1088	2269	0.145673	0	0.1272	267	700	967	0.551722	0.0731558	0.355791	0.207139	0.105213
18S_rRNA_M_Locati	1375	U	1655	1663	3318	0.0766898	0	0.0712473	1470	985	2455	0.0559672	0	0.0530214	479	611	1090	0.444791	0.0435414	0.308054	0.144107	0.116166
18S_rRNA_M_Locati	1376	C	1866	2266	4132	0.129707	0	0	1724	915	2639	0.0067298	0	0.00668733	603	499	1102	0.532789	0.10516	0.3478	0.118163	0.162401
18S_rRNA_M_Locati	1377	U	1925	1915	3840	0.0520669	0	0	1611	970	2581	0.0261597	0	0.0255025	858	541	1399	0.214413	0	0.176661	0.0673877	0.0779659
18S_rRNA_M_Locati	1378	C	2934	3310	6244	0.469245	0	0	3349	1336	4685	0.494037	0	0	1743	648	2391	0.317196	0	0	0	0
18S_rRNA_M_Locati	1379	G	1378	1577	2955	0.235904	0	0.190928	1067	1227	2294	0.12579	0	0.111778	1220	651	1871	0.0647198	0	0	0.100902	0.0783246
18S_rRNA_M_Locati	1380	A	1726	2044	3770	0.0417013	0	0	1346	826	2172	0.220535	0	0.180755	1416	1136	2552	0.314654	0	0	0.0602517	0.0852088
18S_rRNA_M_Locati	1381	U	1461	2268	3729	0.0236282	0	0	1496	971	2467	0.0780434	0	0.0724208	1260	1316	2576	0.312556	0	0	0.0241403	0.0341395
18S_rRNA_M_Locati	1382	U	1470	1899	3369	0.0991889	0	0.0902627	1946	884	2830	0.0478198	0	0	1482	996	2478	0.278741	0	0	0.0300876	0.0425502
18S_rRNA_M_Locati	1383	C	1063	1239	2302	0.559517	0	0.358876	1148	616	1764	0.532125	0	0.34744	1021	527	1548	0.163711	0	0.140758	0.282358	0.100235
18S_rRNA_M_Locati	1384	U	868	1503	2371	0.527352	0	0.345367	1043	703	1746	0.645856	0	0.39255	750	548	1298	0.397519	0.00553714	0.284603	0.34084	0.0441852
18S_rRNA_M_Locati	1385	G	730	2230	2960	0.203107	0	0.168866	730	1235	1965	0.475421	0	0.322338	753	582	1335	0.33508	0	0.251122	0.247442	0.0627088
18S_rRNA_M_Locati	1386	U	1017	3861	4878	0.295848	0	0	1341	2668	4009	0.303436	0	0	529	1337	1866	0.0918407	0	0	0	0
18S_rRNA_M_Locati	1387	G	904	3457	4361	0.234556	0	0	1044	2434	3478	0.184782	0	0	310	964	1274	0.266728	0	0.210695	0.0702316	0.0993225
18S_rRNA_M_Locati	1388	G	952	3583	4535	0.252565	0	0	1123	2970	4093	0.296385	0	0	353	1236	1589	0.0231237	0	0	0	0
18S_rRNA_M_Locati	1389	G	54	202	256	13.4924	0.745345	0.931248	150	293	443	6.21649	0.525587	0.861697	52	138	190	7.35689	0.642388	0.88089	0.891279	0.0293288
18S_rRNA_M_Locati	1390	U	1116	4041	5157	0.369484	0	0	1431	4286	5717	0.510293	0	0	437	1815	2252	0.376387	0	0	0	0
18S_rRNA_M_Locati	1391	G	1622	4099	5721	0.452301	0	0	1520	2817	4337	0.311885	0	0	1013	1652	2665	0.479728	0	0	0	0
18S_rRNA_M_Locati	1392	G	1297	2313	3610	0.0368904	0	0	1176	1854	3030	0.159606	0	0.137678	956	887	1843	0.110563	0	0	0.0458925	0.0649018
18S_rRNA_M_Locati	1393	U	10	76	86	42.2971	0.911922	0.977163	30	483	513	6.41403	0.521548	0.865348	25	34	59	31.1717	0.879674	0.969419	0.93731	0.0509831
18S_rRNA_M_Locati	1394	G	2115	3099	5214	0.392713	0	0	2064	2088	4152	0.154229	0	0	1467	929	2396	0.24692	0	0	0	0
18S_rRNA_M_Locati	1395	G	11	232	243	14.2892	0.769167	0.934845	20	376	396	9.24053	0.646456	0.902571	20	54	74	28.803	0.893085	0.966879	0.934765	0.0262537
18S_rRNA_M_Locati	1396	U	1973	2475	4448	0.238925	0	0	2290	3323	5613	0.34733	0	0	1616	680	2296	0.048885	0	0	0	0
18S_rRNA_M_Locati	1397	G	818	1230	2048	0.779714	0	0.438232	832	1539	2371	0.70437	0	0.413375	1104	614	1718	0.415293	0	0.293553	0.38172	0.0631639
18S_rRNA_M_Locati	1398	C	3881	2476	6357	0.502059	0	0	6310	3515	9825	0.664271	0	0	3209	1163	4372	0.470064	0	0	0	0
18S_rRNA_M_Locati	1399	A	1497	1880	3377	0.0419643	0	0.0402857	1887	1559	3446	0.17263	0	0.147253	1998	946	2944	0.110217	0	0	0.0625127	0.0621362
18S_rRNA_M_Locati	1400	U	1827	2554	4381	0.188929	0	0	2280	2300	4580	0.116054	0	0	1618	1504	3122	0.114655	0	0	0	0
18S_rRNA_M_Locati	1401	G	1618	1963	3581	0.0151064	0	0	2218	1958	4176	0.0440375	0	0	1900	1298	3198	0.134167	0	0	0	0
18S_rRNA_M_Locati	1402	G	1112	1361	2473	0.553615	0.0546439	0.356433	1241	1081	2322	0.876075	0.0875186	0.467079	1618	879	2497	0.195143	0	0.163335	0.328949	0.125517
18S_rRNA_M_Locati	1403	C	1556	2433	3989	0.117176	0	0	1690	1975	3665	0.0777929	0	0.0721963	2632	1112	3744	0.248382	0	0	0.0240654	0.0340336
18S_rRNA_M_Locati	1404	C	2396	2450	4846	0.271648	0	0	2664	2294	4958	0.221326	0	0	2913	1214	4127	0.308277	0	0	0	0
18S_rRNA_M_Locati	1405	G	1220	1353	2573	0.403971	0.0363912	0.287814	1198	1120	2318	0.645743	0.107858	0.392475	1778	634	2412	0.213892	0	0.176264	0.285518	0.0882826
18S_rRNA_M_Locati	1406	U	1374	1508	2882	0.21224	0	0.175131	1741	2155	3896	0.0873606	0	0	1183	809	1992	0.455706	0.0575323	0.313156	0.162762	0.128144
18S_rRNA_M_Locati	1407	U	1368	1716	3084	0.0754079	0	0.0701414	1485	1744	3229	0.0783041	0	0.0726387	1124	838	1962	0.424979	0.010733	0.298342	0.147041	0.106991
18S_rRNA_M_Locati	1408	C	2351	2007	4358	0.303788	0	0	2792	2021	4813	0.347983	0	0	1505	1092	2597	0.00598751	0	0	0	0
18S_rRNA_M_Locati	1409	G	1121	978	2099	0.565772	0.0278277	0.361448	1025	986	2011	0.726474	0.0779879	0.420906	1499	672	2171	0.179445	0	0.152203	0.311519	0.115239
18S_rRNA_M_Locati	1410	U	3581	1357	4938	0.431651	0	0	4124	834	4958	0.400197	0	0	3232	983	4215	0.48215	0	0	0	0
18S_rRNA_M_Locati	1411	A	2164	1238	3402	0.156525	0	0	2648	944	3592	0.169728	0	0	1596	1186	2782	0.19027	0	0	0	0
18S_rRNA_M_Locati	1412	G	1431	701	2132	0.413351	0.0022386	0.292559	1408	735	2143	0.451373	0.0293455	0.311097	1525	669	2194	0.0419792	0	0.0403056	0.214654	0.123515
18S_rRNA_M_Locati	1413	U	1097	604	1701	0.781133	0.125271	0.438704	1190	715	1905	0.572776	0.0515472	0.364303	1074	520	1594	0.441999	0.00321704	0.306652	0.369886	0.0540547
18S_rRNA_M_Locati	1414	U	878	658	1536	1.02854	0.193714	0.507197	960	700	1660	0.826657	0.123514	0.452701	560	405	965	1.42228	0.279695	0.587417	0.515772	0.0553306
18S_rRNA_M_Locati	1415	G	1702	1546	3248	0.118611	0	0	1732	1775	3507	0.236574	0	0	1236	534	1770	0.238083	0	0.192387	0.0641291	0.0906922
18S_rRNA_M_Locati	1416	G	1315	838	2153	0.485046	0.0312397	0.326722	812	1042	1854	0.630584	0.0570116	0.386851	1180	596	1776	0.256193	0	0.204036	0.30587	0.0760766
18S_rRNA_M_Locati	1417	U	2039	1719	3758	0.200133	0	0	1508	1915	3423	0.198303	0	0	1804	1288	3092	0.361339	0	0	0	0
18S_rRNA_M_Locati	1418	G	2242	1382	3624	0.138927	0	0	1346	1700	3046	0.0825803	0	0	1484	1106	2590	0.217955	0	0	0	0
18S_rRNA_M_Locati	1419	G	1917	1118	3035	0.143171	0	0.125276	1207	1183	2390	0.269427	0	0.212313	758	972	1730	0.280743	0	0.219302	0.185631	0.0427722
18S_rRNA_M_Locati	1420	A	2788	1743	4531	0.213847	0	0	1892	2161	4053	0.261056	0	0	975	1048	2023	0.159365	0	0.137518	0.0458393	0.0648265
18S_rRNA_M_Locati	1421	G	1679	961	2640	0.571568	0.0972595	0.36378	727	1341	2068	0.671231	0.114508	0.401755	903	1002	1905	0.381392	0.0052527	0.276197	0.347244	0.0525754
18S_rRNA_M_Locati	1422	C	3079	2087	5166	0.228968	0	0	1686	3114	4800	0.34176	0	0	1349	1629	2978	0.121614	0	0	0	0
18S_rRNA_M_Locati	1423	G	2007	1288	3295	0.352215	0.02316	0.260531	963	1388	2351	0.523323	0.0636257	0.343636	866	973	1839	0.571655	0.082816	0.363854	0.322674	0.04471
18S_rRNA_M_Locati	1424	A	2314	1305	3619	0.272548	0.00636478	0.214221	1271	1555	2826	0.270986	0	0.213269	1096	1163	2259	0.288707	0	0.224105	0.217198	0.00489939
18S_rRNA_M_Locati	1425	U	3513	2357	5870	0.222313	0	0	1593	2805	4398	0.191185	0	0	1507	2038	3545	0.191392	0	0	0	0
18S_rRNA_M_Locati	1426	U	3182	1916	5098	0.0685494	0	0	1664	2265	3929	0.0573593	0	0	1595	2451	4046	0.28457	0	0	0	0
18S_rRNA_M_Locati	1427	U	5072	1814	6886	0.342584	0	0	2355	2836	5191	0.328625	0	0	1648	3494	5142	0.459807	0	0	0	0
18S_rRNA_M_Locati	1428	G	2938	830	3768	0.314773	0	0.23946	1393	1436	2829	0.339753	0	0.25366	829	1671	2500	0.232845	0	0.188929	0.22735	0.0277793
18S_rRNA_M_Locati	1429	U	4381	1013	5394	0.127521	0	0	1705	2020	3725	0.0293493	0	0	1465	1755	3220	0.0814274	0	0	0	0
18S_rRNA_M_Locati	1430	C	4413	1084	5497	0.160972	0	0	1957	1857	3814	0.0642639	0	0	1381	1477	2858	0.0305818	0	0.0296844	0.00989479	0.0139933
18S_rRNA_M_Locati	1431	U	3359	2437	5796	0.23466	0	0	2218	2575	4793	0.301694	0	0	1004	1887	2891	0.0213309	0	0	0	0
18S_rRNA_M_Locati	1432	G	1390	1789	3179	0.401555	0.061793	0.286571	1341	1899	3240	0.0355	0	0.0342932	412	1703	2115	0.300971	0	0.231428	0.184097	0.108293
18S_rRNA_M_Locati	1433	G	2338	1167	3505	0.205416	0	0.170451	853	1394	2247	0.475727	0.0725446	0.322465	627	1268	1895	0.36836	0.00339007	0.269302	0.254073	0.0629867
18S_rRNA_M_Locati	1434	U	2789	1250	4039	0.0385011	0	0	1092	1852	2944	0.0231881	0	0.0226701	930	1521	2451	0.0482554	0	0	0.0075567	0.0106868
18S_rRNA_M_Locati	1435	U	2657	1841	4498	0.153308	0	0	1419	2357	3776	0.230627	0	0	618	2481	3099	0.275065	0	0	0	0
18S_rRNA_M_Locati	1436	G	1572	1081	2653	0.449824	0.0781831	0.310342	867	1254	2121	0.386517	0.0315362	0.278863	405	1497	1902	0.188346	0	0.158564	0.249256	0.065404
18S_rRNA_M_Locati	1437	A	1348	1524	2872	0.286085	0.0118932	0.222507	798	1136	1934	0.461097	0.0384908	0.315694	357	1276	1633	0.342432	0.0204367	0.255199	0.264467	0.0386039
18S_rRNA_M_Locati	1438	U	1418	1398	2816	0.37155	0	0.270968	996	1740	2736	0.00475379	0	0.00473302	299	1657	1956	0.0939931	0	0.0859576	0.120553	0.111409
18S_rRNA_M_Locati	1439	U	1844	1845	3689	0.0536706	0	0.0509499	1250	1366	2616	0.0470004	0	0.0449069	770	1098	1868	0.131336	0	0.116144	0.070667	0.0322517
18S_rRNA_M_Locati	1440	C	1943	1281	3224	0.245798	0	0.197351	1026	1128	2154	0.312276	0	0.23805	1208	978	2186	0.0496012	0	0	0.145134	0.103961
18S_rRNA_M_Locati	1441	C	3062	1894	4956	0.17295	0	0	1784	2028	3812	0.273975	0	0	1433	1495	2928	0.313497	0	0	0	0
18S_rRNA_M_Locati	1442	G	1989	1301	3290	0.332597	0	0.249643	875	950	1825	0.63654	0.0389155	0.389085	678	730	1408	0.500505	0.0540962	0.333715	0.324148	0.0573277
18S_rRNA_M_Locati	1443	A	2267	1524	3791	0.182906	0	0.154658	1279	863	2142	0.403702	0	0.287694	858	661	1519	0.364503	0	0.267261	0.236538	0.0584953
18S_rRNA_M_Locati	1444	U	5727	2779	8506	0.546701	0	0	3671	1692	5363	0.522498	0	0	1683	1218	2901	0.372077	0	0	0	0
18S_rRNA_M_Locati	1445	A	2505	1619	4124	0.106462	0	0.0962394	1400	965	2365	0.259209	0	0.20592	753	717	1470	0.34881	0	0.258736	0.186965	0.0676795
18S_rRNA_M_Locati	1446	A	2307	1044	3351	0.376425	0	0.27354	1514	993	2507	0.15649	0	0.135362	1214	833	2047	0.0873969	0	0	0.1363	0.111674
18S_rRNA_M_Locati	1447	C	5408	2264	7672	0.459703	0	0	3513	1470	4983	0.479173	0	0	1418	1520	2938	0.419035	0	0	0	0
18S_rRNA_M_Locati	1448	G	2440	1434	3874	0.148548	0	0.129364	1443	1159	2602	0.049349	0	0.0470455	628	1027	1655	0.0636205	0	0.059849	0.0787529	0.0361673
18S_rRNA_M_Locati	1449	A	1816	1645	3461	0.265518	0	0.209857	1144	1054	2198	0.225001	0	0.183743	461	852	1313	0.340191	0	0.253982	0.215861	0.0289876
18S_rRNA_M_Locati	1450	A	13	59	72	64.0011	0.954148	0.984823	11	20	31	90.067	0.966287	0.989359	6	43	49	36.6184	0.931945	0.973935	0.982706	0.0064722
18S_rRNA_M_Locati	1451	C	2540	4359	6899	0.455229	0	0	1847	2462	4309	0.474942	0	0	540	1849	2389	0.359949	0	0	0	0
18S_rRNA_M_Locati	1452	G	478	2916	3394	0.251841	0	0.201224	262	1454	1716	0.528176	0	0.345757	266	1204	1470	0.121807	0	0.108647	0.218542	0.0975713
18S_rRNA_M_Locati	1453	A	380	4454	4834	0.120768	0	0	231	2321	2552	0.006389	0	0.00635091	214	1516	1730	0.069966	0	0	0.00211697	0.00299385
18S_rRNA_M_Locati	1454	G	661	3068	3729	0.149407	0	0.130017	445	1726	2171	0.168068	0	0.143942	445	1366	1811	0.128863	0	0	0.0913197	0.0648226
18S_rRNA_M_Locati	1455	A	618	2300	2918	0.503582	0	0.334998	213	1442	1655	0.556991	0	0.357874	471	932	1403	0.155002	0	0.134283	0.275718	0.100445
18S_rRNA_M_Locati	1456	C	1126	3587	4713	0.0749399	0	0	975	1883	2858	0.103591	0	0	717	874	1591	0.0746022	0	0.0694637	0.0231546	0.0327455
18S_rRNA_M_Locati	1457	U	1432	3556	4988	0.0882608	0	0	1179	1760	2939	0.0927173	0	0	792	751	1543	0.193106	0	0.161939	0.0539798	0.0763389
18S_rRNA_M_Locati	1458	C	1529	3874	5403	0.176443	0	0	1824	1880	3704	0.322186	0	0	861	924	1785	0.0491788	0	0.0468986	0.0156329	0.0221082
18S_rRNA_M_Locati	1459	U	1615	4681	6296	0.31987	0	0	1685	1671	3356	0.250822	0	0	589	1295	1884	0.00840554	0	0.00833986	0.00277995	0.00393145
18S_rRNA_M_Locati	1460	G	1549	3241	4790	0.0924256	0	0	1154	1755	2909	0.142566	0	0	1285	984	2269	0.165952	0	0	0	0
18S_rRNA_M_Locati	1461	G	675	1901	2576	0.788406	0.133728	0.440939	410	912	1322	1.01958	0.167839	0.505036	722	469	1191	0.764737	0.149868	0.433549	0.459841	0.0320994
18S_rRNA_M_Locati	1462	C	2272	3246	5518	0.239164	0	0	2001	1633	3634	0.353391	0	0	2011	1038	3049	0.365796	0	0	0	0
18S_rRNA_M_Locati	1463	A	1049	2394	3443	0.236831	0	0.191527	777	794	1571	0.565988	0.0535517	0.361572	1398	645	2043	0.00843118	0	0.00836475	0.187155	0.14423
18S_rRNA_M_Locati	1464	U	1695	3660	5355	0.262675	0	0	1236	1425	2661	0.148923	0	0	1598	1359	2957	0.328717	0	0	0	0
18S_rRNA_M_Locati	1465	G	647	1414	2061	1.06018	0.21546	0.514728	493	609	1102	1.12728	0.21003	0.530142	840	628	1468	0.485099	0.0425768	0.326794	0.457221	0.0924403
18S_rRNA_M_Locati	1466	C	1070	2489	3559	0.114938	0	0.103115	676	1232	1908	0.146406	0	0.127767	1029	820	1849	0.152114	0	0.132092	0.120991	0.0127634
18S_rRNA_M_Locati	1467	U	1550	3317	4867	0.229387	0	0	1121	1785	2906	0.300294	0	0	1464	1344	2808	0.305597	0	0	0	0
18S_rRNA_M_Locati	1468	A	934	1875	2809	0.440336	0.0397484	0.305793	594	1022	1616	0.371971	0.00212923	0.271244	638	1024	1662	0.23352	0	0.189404	0.255481	0.0488054
18S_rRNA_M_Locati	1469	A	960	1774	2734	0.467885	0.0648334	0.318827	599	944	1543	0.394898	0.0375566	0.283233	746	703	1449	0.350023	0	0.259404	0.287155	0.0244173
18S_rRNA_M_Locati	1470	C	1758	3175	4933	0.248282	0	0	923	1835	2758	0.2764	0	0	1213	986	2199	0.197197	0	0	0	0
18S_rRNA_M_Locati	1471	U	2463	2478	4941	0.270053	0	0	1118	1335	2453	0.160704	0	0	1573	855	2428	0.34653	0	0	0	0
18S_rRNA_M_Locati	1472	A	1946	2605	4551	0.211316	0	0	953	1337	2290	0.102197	0	0	1064	871	1935	0.206841	0	0	0	0
18S_rRNA_M_Locati	1473	G	1180	2102	3282	0.11367	0	0.102096	948	1103	2051	0.0133366	0	0.0131674	582	557	1139	0.328548	0	0.247462	0.120908	0.0965709
18S_rRNA_M_Locati	1474	U	1279	2408	3687	0.0748554	0	0	631	1387	2018	0.0082274	0	0	472	684	1156	0.172419	0	0.147171	0.0490571	0.0693772
18S_rRNA_M_Locati	1475	U	2058	2300	4358	0.267832	0	0	800	1238	2038	0.0493924	0	0	513	875	1388	0.116911	0	0	0	0
18S_rRNA_M_Locati	1476	A	766	1139	1905	0.755818	0.176676	0.430594	315	723	1038	0.920308	0.154937	0.479491	158	480	638	0.96465	0.187655	0.491395	0.46716	0.0263089
18S_rRNA_M_Locati	1477	C	783	2409	3192	0.086199	0	0	217	2900	3117	0.480294	0	0	131	660	791	0.424214	0	0.298123	0.0993743	0.140536
18S_rRNA_M_Locati	1478	G	158	1307	1465	0.963734	0.19451	0.490936	69	751	820	1.18243	0.190099	0.542098	63	459	522	1.06497	0.215635	0.516209	0.516415	0.0208873
18S_rRNA_M_Locati	1479	C	767	2579	3346	0.202334	0	0	256	2028	2284	0.20602	0	0	218	871	1089	0.0960754	0	0.0877275	0.0292425	0.0413551
18S_rRNA_M_Locati	1480	G	669	1752	2421	0.134049	0	0.118247	375	1352	1727	0.0779128	0	0.07232	471	575	1046	0.197644	0	0.165159	0.118575	0.0379021
18S_rRNA_M_Locati	1481	G	576	1230	1806	0.652733	0	0.395074	343	581	924	1.20603	0	0.546965	313	488	801	0.76506	0	0.433753	0.458597	0.0644497
18S_rRNA_M_Locati	1482	C	826	1626	2452	0.177239	0	0.150607	380	727	1107	0.827347	0	0.452982	320	1069	1389	0.0157154	0	0.0154832	0.206357	0.182907
18S_rRNA_M_Locati	1483	C	894	760	1654	0.960671	0.11938	0.490122	518	450	968	1.25857	0	0.557497	402	449	851	0.932851	0	0.482923	0.51018	0.0335866
18S_rRNA_M_Locati	1484	C	1013	994	2007	0.702866	0.0824936	0.412876	575	853	1428	0.535938	0	0.349091	404	838	1242	0.40211	0	0.286954	0.34964	0.0514089
18S_rRNA_M_Locati	1485	C	3121	2646	5767	0.440678	0	0	1591	4853	6444	0.736045	0	0	1313	3778	5091	0.723257	0	0	0	0
18S_rRNA_M_Locati	1486	G	1978	1022	3000	0.241383	0	0.194499	969	471	1440	0.625754	0	0.385065	703	440	1143	0.711694	0	0.415996	0.331853	0.0979417
18S_rRNA_M_Locati	1487	C	5109	1542	6651	0.472217	0	0	2485	712	3197	0.296442	0	0	1074	1444	2518	0.248233	0	0	0	0
18S_rRNA_M_Locati	1488	G	1713	810	2523	0.656951	0.0461598	0.396577	817	403	1220	1.13427	0	0.53166	885	260	1145	0.826411	0	0.452694	0.46031	0.0554098
18S_rRNA_M_Locati	1489	C	3627	1567	5194	0.244594	0	0	1687	1051	2738	0.0918543	0	0	1178	1235	2413	0.203917	0	0	0	0
18S_rRNA_M_Locati	1490	G	3070	1639	4709	0.137863	0	0	1591	924	2515	0.0453498	0	0.0433989	794	1015	1809	0.114266	0	0.102599	0.0486661	0.0420513
18S_rRNA_M_Locati	1491	G	2345	1083	3428	0.224866	0	0.183628	656	490	1146	1.43041	0.169648	0.588758	579	865	1444	0.408335	0	0.290084	0.354157	0.171487
18S_rRNA_M_Locati	1492	U	3233	1132	4365	0.0908307	0	0	2205	686	2891	0.156355	0	0	1078	1197	2275	0.222911	0	0	0	0
18S_rRNA_M_Locati	1493	C	3043	1511	4554	0.125837	0	0	2751	893	3644	0.319131	0	0	1645	1048	2693	0.331102	0	0	0	0
18S_rRNA_M_Locati	1494	G	2152	2008	4160	0.189062	0	0.159033	2338	730	3068	0.107444	0	0.097048	673	787	1460	0.408875	0	0.290355	0.182145	0.0805916
18S_rRNA_M_Locati	1495	G	2121	605	2726	0.956888	0	0.489076	1633	419	2052	0.826206	0	0.452537	623	451	1074	0.993488	0.132026	0.498599	0.480071	0.0198537
18S_rRNA_M_Locati	1496	C	2260	1021	3281	0.718745	0	0.418254	2467	809	3276	0.283522	0	0.220946	807	986	1793	0.178447	0	0.151497	0.263566	0.112996
18S_rRNA_M_Locati	1497	G	2090	674	2764	1.09799	0	0.523443	1042	506	1548	1.97783	0	0.664329	954	489	1443	0.49813	0	0.332655	0.506809	0.135915
18S_rRNA_M_Locati	1498	U	2872	1536	4408	0.305884	0	0.234276	1734	1443	3177	0.472117	0	0.320775	1637	434	2071	0.0228335	0	0.0223344	0.192462	0.125374
18S_rRNA_M_Locati	1499	C	3439	1195	4634	0.259765	0	0.206237	2560	680	3240	0.494357	0	0.330884	2047	830	2877	0.291835	0	0	0.17904	0.136445
18S_rRNA_M_Locati	1500	U	19188	4542	23730	0.849769	0	0	16861	1133	17994	0.824708	0	0	3148	1484	4632	0.615685	0	0	0	0
18S_rRNA_M_Locati	1501	G	2833	506	3339	0.668979	0	0.400903	1780	456	2236	1.13691	0	0.532147	981	479	1460	0.398106	0	0.284886	0.405979	0.101008
18S_rRNA_M_Locati	1502	C	7329	924	8253	0.438558	0	0	9865	559	10424	0.655837	0	0	2239	532	2771	0.326122	0	0	0	0
18S_rRNA_M_Locati	1503	A	1054	475	1529	2.22286	0	0.689857	1251	272	1523	1.77289	0	0.639517	728	293	1021	0.939628	0.0256742	0.484682	0.604685	0.0873084
18S_rRNA_M_Locati	1504	A	1117	340	1457	2.07289	0	0.674724	1275	215	1490	1.63261	0	0.620307	1026	189	1215	0.571071	0	0.363682	0.552904	0.135632
18S_rRNA_M_Locati	1505	C	1482	635	2117	0.854155	0	0.460788	1556	412	1968	0.765307	0	0.433651	1516	382	1898	0.103177	0	0	0.298146	0.211112
18S_rRNA_M_Locati	1506	U	1046	899	1945	0.788118	0	0.44088	1488	361	1849	0.667249	0	0.400339	1048	414	1462	0.0744817	0	0.0693628	0.303527	0.166404
18S_rRNA_M_Locati	1507	U	21	26	47	51.7319	0.919041	0.981424	12	14	26	83.8	0.924496	0.988639	8	4	12	115.734	0.973566	0.992087	0.987384	0.00444295
18S_rRNA_M_Locati	1508	C	1266	708	1974	0.204726	0	0.170007	944	497	1441	0.428587	0	0.300153	1607	387	1994	0.34797	0	0	0.15672	0.122897
18S_rRNA_M_Locati	1509	U	894	549	1443	0.646222	0.0214112	0.392714	875	367	1242	0.358943	0	0.264291	1318	213	1531	0.143161	0	0	0.219001	0.163492
18S_rRNA_M_Locati	1510	U	1339	536	1875	0.391868	0	0.281649	1871	308	2179	0.233614	0	0	1591	329	1920	0.328128	0	0	0.093883	0.132771
18S_rRNA_M_Locati	1511	A	1511	1100	2611	0.0731708	0	0.0682062	1043	738	1781	0.00554309	0	0.00551561	409	464	873	0.596707	0	0.373979	0.149234	0.160967
18S_rRNA_M_Locati	1512	G	1423	885	2308	0.488157	0	0.328124	612	743	1355	0.829458	0	0.453573	60	539	599	1.38983	0.186859	0.581967	0.454554	0.103633
18S_rRNA_M_Locati	1513	A	1714	2443	4157	0.156352	0	0	713	1257	1970	0.310406	0	0.23697	130	912	1042	0.313071	0	0.238601	0.158524	0.112095
18S_rRNA_M_Locati	1514	G	1945	3097	5042	0.249988	0	0	888	1791	2679	0.0321766	0	0.0311848	1144	859	2003	0.343369	0	0	0.0103949	0.0147007
18S_rRNA_M_Locati	1515	G	1740	3632	5372	0.258864	0	0	868	1861	2729	0.0833578	0	0.0769699	707	1186	1893	0.323225	0	0	0.0256566	0.036284
18S_rRNA_M_Locati	1516	G	1429	2786	4215	0.0645451	0	0.0606452	880	1437	2317	0.435088	0	0.30327	397	1040	1437	0.0794545	0	0	0.121305	0.131029
18S_rRNA_M_Locati	1517	A	1135	2536	3671	0.344396	0	0.256223	714	1256	1970	0.892897	0	0.471836	352	641	993	0.355679	0	0.262557	0.330205	0.100181
18S_rRNA_M_Locati	1518	C	5812	4059	9871	0.5563	0	0	9463	3067	12530	0.781782	0	0	473	1478	1951	0.361453	0	0	0	0
18S_rRNA_M_Locati	1519	A	406	2484	2890	0.91595	0.105371	0.478152	395	1410	1805	1.40377	0	0.584121	48	752	800	0.779539	0.156344	0.438364	0.500212	0.0615153
18S_rRNA_M_Locati	1520	A	251	3344	3595	0.531093	0	0.346935	225	1850	2075	1.12858	0	0.530322	59	878	937	0.559607	0.0832002	0.359058	0.412105	0.0837385
18S_rRNA_M_Locati	1521	G	1091	2770	3861	0.452632	0	0.31165	820	1731	2551	0.783316	0	0.439343	522	608	1130	0.314049	0	0.239154	0.330049	0.082756
18S_rRNA_M_Locati	1522	U	1519	5139	6658	0.17711	0	0	1066	3800	4866	0.0762162	0	0	490	1009	1499	0.0504148	0	0.0480256	0.0160085	0.0226395
18S_rRNA_M_Locati	1523	G	2341	5042	7383	0.235085	0	0	1376	4725	6101	0.255703	0	0	530	949	1479	0.189887	0	0.159675	0.053225	0.0752715
18S_rRNA_M_Locati	1524	G	1326	3011	4337	0.416679	0	0.294172	736	2960	3696	0.328714	0	0.247443	389	806	1195	0.636139	0.100981	0.389004	0.310206	0.0588936
18S_rRNA_M_Locati	1525	C	2248	6281	8529	0.375967	0	0	1132	6169	7301	0.459013	0	0	291	1453	1744	0.121102	0	0.108075	0.0360251	0.0509472
18S_rRNA_M_Locati	1526	G	1218	3232	4450	0.302878	0	0.232509	576	2875	3451	0.281338	0	0.219615	344	1893	2237	0.101688	0	0	0.150708	0.106697
18S_rRNA_M_Locati	1527	U	1721	4662	6383	0.117443	0	0	455	4741	5196	0.156939	0	0	335	2257	2592	0.212435	0	0	0	0
18S_rRNA_M_Locati	1528	U	1737	5513	7250	0.252033	0	0	1263	4097	5360	0.189096	0	0	661	2954	3615	0.469014	0	0	0	0
18S_rRNA_M_Locati	1529	C	2812	4474	7286	0.285287	0	0	2354	2440	4794	0.091753	0	0	927	2693	3620	0.487796	0	0	0	0
18S_rRNA_M_Locati	1530	A	1775	3353	5128	0.0165941	0	0	1554	1821	3375	0.251662	0	0.20111	531	1920	2451	0.242192	0	0	0.0670366	0.0948041
18S_rRNA_M_Locati	1531	G	867	1360	2227	1.3373	0.279547	0.572266	556	913	1469	2.05342	0.358959	0.672648	199	1107	1306	0.428581	0	0.300166	0.515027	0.15736
18S_rRNA_M_Locati	1532	C	1128	1686	2814	0.665881	0.0533783	0.399802	739	1697	2436	0.684188	0.0224898	0.406341	292	999	1291	0.305521	0	0.234161	0.346768	0.0796699
18S_rRNA_M_Locati	1533	C	2992	2714	5706	0.272284	0	0	2176	4053	6229	0.421199	0	0	494	677	1171	0.286301	0	0.222725	0.0742415	0.104993
18S_rRNA_M_Locati	1534	A	1587	1854	3441	0.186962	0	0.157551	919	2768	3687	0.00538985	0	0.0053624	370	271	641	1.1707	0.14748	0.539706	0.234207	0.224778
18S_rRNA_M_Locati	1535	C	2755	2451	5206	0.327523	0	0	1998	3586	5584	0.417481	0	0	589	221	810	0.447979	0	0.309646	0.103215	0.145969
18S_rRNA_M_Locati	1536	G	1494	928	2422	0.48689	0	0.327546	779	1274	2053	0.710673	0	0.415553	293	143	436	1.55205	0.20812	0.608703	0.450601	0.117427
18S_rRNA_M_Locati	1537	C	2643	1699	4342	0.244687	0	0	1960	3879	5839	0.493588	0	0	509	450	959	0.100845	0	0.0916936	0.0305645	0.0432248
18S_rRNA_M_Locati	1538	G	1383	871	2254	0.54879	0.0390145	0.354436	736	1341	2077	0.582414	0.0199725	0.368166	182	384	566	1.03177	0.167558	0.508258	0.410287	0.0695027
18S_rRNA_M_Locati	1539	A	1368	1333	2701	0.271671	0	0.213695	697	1559	2256	0.373578	0	0.272062	299	507	806	0.49419	0.053655	0.331015	0.272258	0.0478959
18S_rRNA_M_Locati	1540	G	865	1328	2193	0.498572	0.0167804	0.332799	881	991	1872	0.480637	0	0.324732	343	879	1222	0.00649587	0	0	0.219177	0.155017
18S_rRNA_M_Locati	1541	A	852	1267	2119	0.573653	0.048425	0.364645	969	845	1814	0.465473	0	0.317746	473	703	1176	0.155924	0	0.13499	0.27246	0.0990738
18S_rRNA_M_Locati	1542	C	1827	2853	4680	0.372328	0	0	1745	1341	3086	0.272649	0	0	1165	1070	2235	0.40644	0	0	0	0
18S_rRNA_M_Locati	1543	U	1588	2666	4254	0.289631	0	0	1524	1070	2594	0.145091	0	0	1365	923	2288	0.38768	0	0	0	0
18S_rRNA_M_Locati	1544	G	1239	1360	2599	0.266547	0	0.210516	932	641	1573	0.399456	0	0.285566	950	608	1558	0.0240895	0	0.0235376	0.173207	0.110178
18S_rRNA_M_Locati	1545	A	1972	1774	3746	0.140163	0	0	962	937	1899	0.131778	0	0.116488	1185	662	1847	0.126563	0	0	0.0388295	0.0549132
18S_rRNA_M_Locati	1546	G	1011	1065	2076	0.653592	0.0566514	0.395371	530	701	1231	0.789241	0.090713	0.441304	704	327	1031	0.677939	0.0737511	0.404264	0.413646	0.0198909
18S_rRNA_M_Locati	1547	C	2341	1735	4076	0.140299	0	0	2038	977	3015	0.239128	0	0	1566	525	2091	0.191284	0	0	0	0
18S_rRNA_M_Locati	1548	A	1381	1215	2596	0.479194	0.00260079	0.32404	857	567	1424	0.861559	0.0105283	0.462991	984	379	1363	0.333032	0	0.249968	0.345666	0.0883003
18S_rRNA_M_Locati	1549	A	1244	1550	2794	0.301459	0	0.231695	732	797	1529	0.687277	0	0.407487	936	313	1249	0.379049	0	0.275022	0.304735	0.0747788
18S_rRNA_M_Locati	1550	U	2952	2679	5631	0.421137	0	0	2347	1568	3915	0.400783	0	0	1840	853	2693	0.445694	0	0	0	0
18S_rRNA_M_Locati	1551	A	1374	1647	3021	0.208946	0	0.17288	935	953	1888	0.451797	0	0.311312	854	466	1320	0.277214	0	0.217175	0.233789	0.0577227
18S_rRNA_M_Locati	1552	A	1192	1543	2735	0.345029	0	0.256591	726	999	1725	0.656779	0	0.396558	842	400	1242	0.360168	0	0.264953	0.306034	0.0641008
18S_rRNA_M_Locati	1553	C	5360	2226	7586	0.565858	0	0	5375	1790	7165	0.668713	0	0	2328	545	2873	0.462232	0	0	0	0
18S_rRNA_M_Locati	1554	A	2168	2165	4333	0.180657	0	0	1772	2135	3907	0.318555	0	0	1507	405	1912	0.170715	0	0	0	0
18S_rRNA_M_Locati	1555	G	50	45	95	41.1382	0.928598	0.97651	77	280	357	7.78479	0.644655	0.886449	26	36	62	26.9836	0.894246	0.964812	0.94259	0.0399842
18S_rRNA_M_Locati	1556	G	1137	1462	2599	0.420316	0	0.296012	800	1156	1956	0.503214	0	0.334872	906	217	1123	0.42412	0	0.297998	0.309627	0.0178693
18S_rRNA_M_Locati	1557	U	2114	1932	4046	0.179266	0	0	1668	1775	3443	0.237979	0	0	1787	589	2376	0.436409	0	0	0	0
18S_rRNA_M_Locati	1558	C	1831	1524	3355	0.017895	0	0.0175855	1336	1203	2539	0.0709843	0	0.0663038	1371	399	1770	0.231671	0	0	0.0279631	0.0280454
18S_rRNA_M_Locati	1559	U	2246	3319	5565	0.45121	0	0	1601	1683	3284	0.227042	0	0	1413	562	1975	0.370676	0	0	0	0
18S_rRNA_M_Locati	1560	G	923	1500	2423	0.278543	0	0.21793	711	772	1483	0.634149	0	0.388221	744	273	1017	0.170454	0	0.145753	0.250635	0.101653
18S_rRNA_M_Locati	1561	U	1874	1898	3772	0.249312	0	0	1886	1815	3701	0.452731	0	0	616	448	1064	0.0152113	0	0.0149972	0.00499907	0.00706976
18S_rRNA_M_Locati	1562	G	1162	1125	2287	0.358557	0	0.26401	828	1072	1900	0.202484	0	0.168462	535	283	818	0.382241	0	0.276782	0.236418	0.0483342
18S_rRNA_M_Locati	1563	A	828	1087	1915	0.627001	0.0934192	0.385496	614	989	1603	0.440254	0.0241513	0.30581	335	318	653	0.712623	0.0583348	0.416472	0.369259	0.0466136
18S_rRNA_M_Locati	1564	U	1058	2560	3618	0.204418	0	0	806	1628	2434	0.0833812	0	0	263	561	824	0.289064	0	0.224454	0.0748181	0.105809
18S_rRNA_M_Locati	1565	G	575	1002	1577	0.969511	0.198793	0.492418	444	652	1096	1.19625	0.203195	0.544905	160	177	337	2.42567	0.380441	0.708699	0.582007	0.0921113
18S_rRNA_M_Locati	1566	C	958	1399	2357	0.21907	0	0.179765	1078	725	1803	0.271927	0	0.213884	332	398	730	0.575954	0.0772109	0.365781	0.253143	0.0808557
18S_rRNA_M_Locati	1567	C	1063	1946	3009	0.0552713	0	0	924	784	1708	0.382433	0	0.276755	393	416	809	0.525473	0.0988763	0.344745	0.207166	0.149095
18S_rRNA_M_Locati	1568	C	1025	2171	3196	0.1106	0	0	1057	1189	2246	0.0300252	0	0.0291626	848	619	1467	0.112579	0	0	0.00972086	0.0137474
18S_rRNA_M_Locati	1569	U	982	2115	3097	0.0710853	0	0	1154	1677	2831	0.193099	0	0	616	768	1384	0.000449258	0	0	0	0
18S_rRNA_M_Locati	1570	U	2194	1805	3999	0.299581	0	0	2757	1585	4342	0.502461	0	0	949	1134	2083	0.320847	0	0	0	0
18S_rRNA_M_Locati	1571	A	1354	2096	3450	0.189333	0	0	649	2214	2863	0.201009	0	0	563	1743	2306	0.368511	0	0	0	0
18S_rRNA_M_Locati	1572	G	867	1511	2378	0.24741	0.0152308	0.198406	790	1269	2059	0.179795	0	0.152458	820	1101	1921	0.172702	0	0	0.116955	0.0848001
18S_rRNA_M_Locati	1573	A	888	1692	2580	0.131013	0	0.115877	532	1264	1796	0.369962	0	0.270163	710	877	1587	0.0651903	0	0.0612368	0.149092	0.0884683
18S_rRNA_M_Locati	1574	U	937	2455	3392	0.181848	0	0	531	2369	2900	0.205351	0	0	574	1830	2404	0.318563	0	0	0	0
18S_rRNA_M_Locati	1575	G	419	1624	2043	0.411671	0.106396	0.291721	271	1208	1479	0.644369	0.126948	0.392025	142	590	732	1.51187	0.357815	0.602217	0.428654	0.129379
18S_rRNA_M_Locati	1576	U	490	1842	2332	0.185346	0	0.156421	602	1423	2025	0.124005	0	0.110372	200	1452	1652	0.0488943	0	0.046642	0.104478	0.0450104
18S_rRNA_M_Locati	1577	C	742	1807	2549	0.0267495	0	0.0260625	581	1075	1656	0.31775	0.0242198	0.241241	178	1125	1303	0.33721	0.0403912	0.252319	0.173208	0.104146
18S_rRNA_M_Locati	1578	C	986	2059	3045	0.172102	0	0	1223	1437	2660	0.220001	0	0	96	1628	1724	0.0260225	0	0	0	0
18S_rRNA_M_Locati	1579	G	862	1705	2567	0.00443493	0	0	697	1800	2497	0.170741	0	0	273	1662	1935	0.169668	0	0	0	0
18S_rRNA_M_Locati	1580	G	753	2020	2773	0.0550469	0	0	392	1511	1903	0.199183	0	0.166172	290	1568	1858	0.12383	0	0	0.0553906	0.0783341
18S_rRNA_M_Locati	1581	G	937	1979	2916	0.130438	0	0	767	1578	2345	0.0824382	0	0	490	1437	1927	0.202634	0	0	0	0
18S_rRNA_M_Locati	1582	G	716	1188	1904	0.421586	0.0622577	0.29667	466	1221	1687	0.345333	0	0.256803	623	979	1602	0.0126915	0	0	0.184491	0.131466
18S_rRNA_M_Locati	1583	C	866	1045	1911	0.411605	0.0417709	0.291695	616	1302	1918	0.151613	0	0.131712	687	857	1544	0.0126357	0	0	0.141136	0.11927
18S_rRNA_M_Locati	1584	U	996	1841	2837	0.0622152	0	0	858	2052	2910	0.261212	0	0	591	1298	1889	0.231088	0	0	0	0
18S_rRNA_M_Locati	1585	G	756	1404	2160	0.251843	0	0.201252	462	1016	1478	0.509556	0	0.337705	339	469	808	0.826343	0.183046	0.452764	0.330574	0.102803
18S_rRNA_M_Locati	1586	C	2930	1553	4483	0.44152	0	0	2967	1529	4496	0.580973	0	0	734	1091	1825	0.295972	0	0	0	0
18S_rRNA_M_Locati	1587	A	907	1093	2000	0.379383	0	0.275138	484	514	998	1.24747	0.140586	0.555303	368	463	831	0.575868	0.0799239	0.365708	0.398716	0.116734
18S_rRNA_M_Locati	1588	C	1589	1494	3083	0.1664	0	0	1165	916	2081	0.0162184	0	0	485	728	1213	0.0203002	0	0	0	0
18S_rRNA_M_Locati	1589	G	815	1224	2039	0.314336	0	0.239248	559	650	1209	0.751726	0	0.429337	343	600	943	0.239124	0	0.193144	0.287243	0.102223
18S_rRNA_M_Locati	1590	C	1233	2380	3613	0.32858	0	0	1250	1488	2738	0.321447	0	0	413	965	1378	0.241971	0	0	0	0
18S_rRNA_M_Locati	1591	G	439	1411	1850	0.420746	0	0.296257	358	680	1038	0.96087	0.0179992	0.490263	224	310	534	1.07996	0.178064	0.519688	0.435403	0.0991216
18S_rRNA_M_Locati	1592	C	1444	2102	3546	0.332838	0	0	1233	1571	2804	0.35327	0	0	491	807	1298	0.219271	0	0	0	0
18S_rRNA_M_Locati	1593	G	864	1069	1933	0.227985	0	0.185736	776	720	1496	0.208372	0	0.172536	451	360	811	0.243213	0	0.195827	0.184699	0.00953658
18S_rRNA_M_Locati	1594	C	691	1046	1737	0.371436	0	0.270951	644	962	1606	0.145986	0	0.127458	393	647	1040	0.0577223	0	0	0.132803	0.11068
18S_rRNA_M_Locati	1595	C	855	1091	1946	0.175552	0	0.149401	649	1002	1651	0.107526	0	0.0971399	389	687	1076	0.112421	0	0	0.0821804	0.0619033
18S_rRNA_M_Locati	1596	A	559	625	1184	1.03003	0.18587	0.507608	459	492	951	1.07396	0.193335	0.518093	257	279	536	0.911401	0.154927	0.477288	0.500997	0.0173021
18S_rRNA_M_Locati	1597	C	2843	811	3654	0.447798	0	0	2461	618	3079	0.459289	0	0	974	613	1587	0.446229	0	0	0	0
18S_rRNA_M_Locati	1598	A	1245	519	1764	0.276198	0	0.216518	956	583	1539	0.230808	0	0.187625	427	362	789	0.27166	0	0.213839	0.205994	0.0130351
18S_rRNA_M_Locati	1599	A	1377	493	1870	0.18418	0	0.155604	1145	490	1635	0.12843	0	0.113875	427	314	741	0.342378	0.0175664	0.25531	0.174929	0.0593357
18S_rRNA_M_Locati	1600	U	1733	773	2506	0.125152	0	0	1069	940	2009	0.09911	0	0	296	606	902	0.0845207	0	0.0780134	0.0260045	0.0367759
18S_rRNA_M_Locati	1601	G	1207	989	2196	0.0308906	0	0.0299782	1045	925	1970	0.0848469	0	0	370	547	917	0.0450738	0	0.0431748	0.0243843	0.0180644
18S_rRNA_M_Locati	1602	G	1678	1077	2755	0.186446	0	0	1238	1067	2305	0.231078	0	0	541	616	1157	0.201324	0	0	0	0
18S_rRNA_M_Locati	1603	G	958	608	1566	0.653833	0.0861379	0.395496	475	784	1259	0.620767	0.0605218	0.383196	632	252	884	0.136434	0	0.120174	0.299622	0.126988
18S_rRNA_M_Locati	1604	C	1111	1065	2176	0.13071	0	0.115647	467	1498	1965	0.0523228	0	0	690	534	1224	0.248662	0	0	0.038549	0.0545165
18S_rRNA_M_Locati	1605	G	1570	1375	2945	0.185117	0	0	838	1125	1963	0.065835	0	0	659	382	1041	0.105971	0	0	0	0
18S_rRNA_M_Locati	1606	G	1574	958	2532	0.00499627	0	0	710	771	1481	0.282479	0	0.220376	519	274	793	0.244738	0	0.196817	0.139064	0.0988026
18S_rRNA_M_Locati	1607	A	1320	775	2095	0.222832	0	0.182297	614	764	1378	0.372468	0	0.271529	341	296	637	0.594566	0.099691	0.373237	0.275688	0.0780063
18S_rRNA_M_Locati	1608	U	1609	979	2588	0.0152483	0	0	1006	997	2003	0.0621424	0	0	498	432	930	0.0886025	0	0.0814714	0.0271571	0.038406
18S_rRNA_M_Locati	1609	C	4161	865	5026	0.561353	0	0	2938	1052	3990	0.591648	0	0	1017	491	1508	0.373124	0	0	0	0
18S_rRNA_M_Locati	1610	A	1199	516	1715	0.535153	0.0208462	0.348731	673	324	997	1.05961	0.118799	0.514721	353	297	650	0.640587	0.102008	0.390828	0.418094	0.0704543
18S_rRNA_M_Locati	1611	A	1173	420	1593	0.617893	0.0353764	0.38206	692	197	889	1.27325	0.14205	0.560377	469	172	641	0.619349	0.044105	0.382836	0.441758	0.0838771
18S_rRNA_M_Locati	1612	C	1679	1156	2835	0.166733	0	0	1250	658	1908	0.0249578	0	0.0243625	859	551	1410	0.328868	0	0	0.00812084	0.0114846
18S_rRNA_M_Locati	1613	G	1195	782	1977	0.222812	0	0.182288	889	705	1594	0.270296	0	0.212887	866	263	1129	0.136136	0	0	0.131725	0.0939776
18S_rRNA_M_Locati	1614	U	1131	1573	2704	0.134295	0	0	1158	1744	2902	0.33545	0	0	959	427	1386	0.318385	0	0	0	0
18S_rRNA_M_Locati	1615	G	575	954	1529	0.554379	0	0.356806	721	1014	1735	0.159197	0	0.137402	666	304	970	0.0218789	0	0	0.164736	0.146942
18S_rRNA_M_Locati	1616	U	1281	1729	3010	0.339854	0	0	1382	1507	2889	0.404456	0	0	552	631	1183	0.28552	0	0	0	0
18S_rRNA_M_Locati	1617	G	540	1021	1561	0.361417	0	0.265596	515	610	1125	0.709631	0	0.415294	194	267	461	0.956013	0.195519	0.489297	0.390063	0.0930521
18S_rRNA_M_Locati	1618	C	883	1297	2180	0.0710123	0	0	1855	869	2724	0.363486	0	0	263	526	789	0.0568636	0	0.0538686	0.0179562	0.0253939
18S_rRNA_M_Locati	1619	C	566	1657	2223	0.114863	0	0	838	842	1680	0.0806332	0	0.0746577	115	557	672	0.1842	0	0.155744	0.0768004	0.0636001
18S_rRNA_M_Locati	1620	U	946	1868	2814	0.349327	0	0	943	1233	2176	0.227025	0	0	156	654	810	0.102014	0	0	0	0
18S_rRNA_M_Locati	1621	A	384	782	1166	0.663839	0.109774	0.399186	319	604	923	0.835859	0.145595	0.455564	52	409	461	0.528668	0.0616318	0.346326	0.400359	0.0446041
18S_rRNA_M_Locati	1622	C	397	738	1135	0.668496	0.104438	0.400869	356	632	988	0.602404	0.0130321	0.376175	57	413	470	0.393088	0	0.282601	0.353215	0.0509393
18S_rRNA_M_Locati	1623	C	741	799	1540	0.164294	0	0.141189	638	609	1247	0.151425	0	0.131602	252	460	712	0.159483	0	0	0.0909305	0.0644166
18S_rRNA_M_Locati	1624	C	678	981	1659	0.134063	0	0.118278	525	935	1460	0.00655563	0	0	273	377	650	0.0119986	0	0	0.0394258	0.0557566
18S_rRNA_M_Locati	1625	U	488	1890	2378	0.239895	0	0	478	1509	1987	0.339677	0	0	146	752	898	0.31409	0	0	0	0
18S_rRNA_M_Locati	1626	G	463	853	1316	0.471594	0	0.32063	275	857	1132	0.210787	0	0.174218	90	398	488	0.348421	0	0.258784	0.251211	0.0600118
18S_rRNA_M_Locati	1627	C	312	1572	1884	0.0483643	0	0.0461564	370	938	1308	0.0459129	0	0.0439295	54	409	463	0.503807	0	0.335502	0.141863	0.136927
18S_rRNA_M_Locati	1628	G	214	1022	1236	0.821522	0.143738	0.451209	71	478	549	1.7403	0.324722	0.635499	26	201	227	2.3788	0.422927	0.704952	0.59722	0.107068
18S_rRNA_M_Locati	1629	C	994	1298	2292	0.0132868	0	0.0131182	258	927	1185	0.254225	0	0.202831	375	362	737	0.0363445	0	0.0351158	0.0836885	0.0847241
18S_rRNA_M_Locati	1630	C	1293	2179	3472	0.34081	0	0	609	1668	2277	0.394883	0	0	552	653	1205	0.397715	0	0	0	0
18S_rRNA_M_Locati	1631	G	799	1218	2017	0.291168	0	0.225594	595	799	1394	0.103449	0	0.0938114	262	546	808	0.00862519	0	0.00856192	0.109323	0.0892794
18S_rRNA_M_Locati	1632	A	701	1217	1918	0.384703	0	0.277928	401	649	1050	0.507125	0.000648713	0.336698	188	366	554	0.552553	0	0.356313	0.323646	0.0333048
18S_rRNA_M_Locati	1633	C	1867	2157	4024	0.365245	0	0	1755	754	2509	0.386813	0	0	496	887	1383	0.406824	0	0	0	0
18S_rRNA_M_Locati	1634	A	1022	2696	3718	0.285561	0	0	808	762	1570	0.10406	0	0.0943062	240	762	1002	0.018068	0	0	0.0314354	0.0444564
18S_rRNA_M_Locati	1635	G	1265	1972	3237	0.147327	0	0	942	631	1573	0.168326	0	0.144153	250	792	1042	0.0565356	0	0.053559	0.0659039	0.0594939
18S_rRNA_M_Locati	1636	G	776	1222	1998	0.403607	0	0.287653	596	540	1136	0.673947	0.0742934	0.402821	89	454	543	1.19986	0.175382	0.545881	0.412118	0.105626
18S_rRNA_M_Locati	1637	C	1212	2071	3283	0.218169	0	0	1035	1219	2254	0.173644	0	0	98	1029	1127	0.0511426	0	0.0486954	0.0162318	0.0229552
18S_rRNA_M_Locati	1638	G	886	1012	1898	0.407039	0.000163804	0.289396	772	813	1585	0.253636	0	0.202422	300	517	817	0.545681	0	0.353315	0.281711	0.0618411
18S_rRNA_M_Locati	1639	C	1850	1189	3039	0.195493	0	0	1304	1657	2961	0.375294	0	0	507	688	1195	0.0535024	0	0.0508256	0.0169419	0.0239594
18S_rRNA_M_Locati	1640	G	1600	1006	2606	0.117346	0	0	1069	1267	2336	0.183692	0	0	1764	649	2413	0.536035	0	0	0	0
18S_rRNA_M_Locati	1641	G	1449	876	2325	0.0709229	0	0	1019	1045	2064	0.0562443	0	0	1723	410	2133	0.45064	0	0	0	0
18S_rRNA_M_Locati	1642	G	862	159	1021	1.16613	0.257441	0.538591	575	414	989	1.24099	0.158169	0.554018	849	49	898	0.506909	0	0.336638	0.476416	0.0990381
18S_rRNA_M_Locati	1643	U	2193	365	2558	0.228831	0	0	2502	926	3428	0.418985	0	0	1566	75	1641	0.222012	0	0	0	0
18S_rRNA_M_Locati	1644	A	1113	683	1796	0.0861436	0	0.0793521	971	544	1515	0.46965	0	0.319709	697	156	853	0.580549	0	0.367581	0.255547	0.126112
18S_rRNA_M_Locati	1645	A	855	463	1318	0.528422	0.0850046	0.345902	578	484	1062	1.23953	0.197337	0.553711	569	94	663	1.04756	0.153945	0.51199	0.470534	0.089759
18S_rRNA_M_Locati	1646	C	1153	425	1578	0.207466	0	0.17191	1339	764	2103	0.0539766	0	0.0512354	835	133	968	0.320227	0	0.242744	0.155296	0.0790608
18S_rRNA_M_Locati	1647	C	1237	435	1672	0.0940825	0	0.0860391	1206	643	1849	0.206366	0	0.171141	1146	178	1324	0.141182	0	0	0.0857267	0.0698684
18S_rRNA_M_Locati	1648	C	1656	703	2359	0.29104	0	0	3051	1290	4341	0.564942	0	0	1557	427	1984	0.511716	0	0	0	0
18S_rRNA_M_Locati	1649	G	967	664	1631	0.0786629	0	0.0729677	1131	876	2007	0.0619577	0	0.0583703	785	232	1017	0.0194281	0	0.0190762	0.0501381	0.0227582
18S_rRNA_M_Locati	1650	U	973	863	1836	0.0877397	0	0	1335	1050	2385	0.195786	0	0	934	219	1153	0.186992	0	0	0	0
18S_rRNA_M_Locati	1651	U	1315	1277	2592	0.393568	0	0	2174	1071	3245	0.467676	0	0	641	339	980	0.0719221	0	0	0	0
18S_rRNA_M_Locati	1652	G	627	1006	1633	0.0459744	0	0.0439794	916	493	1409	0.319543	0	0.242292	308	348	656	0.383274	0.0364434	0.277383	0.187885	0.10276
18S_rRNA_M_Locati	1653	A	442	774	1216	0.434246	0.0530475	0.302943	690	528	1218	0.421566	0	0.296722	151	509	660	0.264885	0	0.209665	0.269777	0.0425812
18S_rRNA_M_Locati	1654	A	145	596	741	1.43267	0.330065	0.589256	185	460	645	1.60855	0.286441	0.617011	173	355	528	0.456606	0.00487349	0.31388	0.506716	0.136826
18S_rRNA_M_Locati	1655	C	605	711	1316	0.301755	0.0187229	0.231941	456	457	913	0.585582	0.0559622	0.369572	220	272	492	0.378274	0.037975	0.274859	0.292124	0.0574984
18S_rRNA_M_Locati	1656	C	916	775	1691	0.0523772	0	0.0497983	662	366	1028	0.426768	0	0.299319	423	193	616	0.0998379	0	0.0909091	0.146676	0.109232
18S_rRNA_M_Locati	1657	C	993	847	1840	0.0120225	0	0	625	403	1028	0.392063	0	0.281839	411	197	608	0.143642	0	0.125781	0.135873	0.115281
18S_rRNA_M_Locati	1658	C	1117	1197	2314	0.184872	0	0	611	737	1348	0.0682069	0	0.0638961	303	391	694	0.0710472	0	0.0664235	0.0434399	0.030734
18S_rRNA_M_Locati	1659	G	1087	749	1836	0.118823	0	0.106255	606	590	1196	0.277852	0	0.217579	148	223	371	1.27799	0.250179	0.561679	0.295171	0.193852
18S_rRNA_M_Locati	1660	C	1317	688	2005	0.0809682	0	0.074938	778	640	1418	0.121102	0	0.108089	146	336	482	0.909409	0.196785	0.476795	0.21994	0.182127
18S_rRNA_M_Locati	1661	C	1292	430	1722	0.412833	0.053687	0.292322	1006	474	1480	0.196992	0	0.164665	451	161	612	0.724524	0.171342	0.420528	0.292505	0.104456
18S_rRNA_M_Locati	1662	C	2092	1141	3233	0.24374	0	0	1912	1152	3064	0.431655	0	0	1118	373	1491	0.271731	0	0	0	0
18S_rRNA_M_Locati	1663	G	1077	1023	2100	0.309477	0.0172666	0.236422	637	890	1527	0.343172	0	0.255618	1042	350	1392	0.130191	0	0	0.164013	0.11624
18S_rRNA_M_Locati	1664	U	2121	1786	3907	0.315279	0	0	1488	1857	3345	0.419908	0	0	982	753	1735	0.284761	0	0	0	0
18S_rRNA_M_Locati	1665	G	1389	1084	2473	0.154379	0	0.13378	775	724	1499	0.464689	0	0.317406	555	748	1303	0.0101568	0	0.0100623	0.153749	0.126264
18S_rRNA_M_Locati	1666	A	1335	1149	2484	0.151759	0	0.131809	738	836	1574	0.408501	0	0.290156	463	1047	1510	0.141849	0	0	0.140655	0.118621
18S_rRNA_M_Locati	1667	U	1906	2015	3921	0.314386	0	0	1386	1558	2944	0.281551	0	0	244	2042	2286	0.471515	0	0	0	0
18S_rRNA_M_Locati	1668	G	1753	1751	3504	0.220307	0	0	1099	1454	2553	0.138763	0	0	62	1627	1689	0.263307	0	0	0	0
18S_rRNA_M_Locati	1669	G	1468	2141	3609	0.28109	0	0	1047	1405	2452	0.133868	0	0	150	1368	1518	0.226955	0	0	0	0
18S_rRNA_M_Locati	1670	G	869	2253	3122	0.164817	0	0	888	1268	2156	0.00168959	0	0	28	875	903	0.335865	0	0.25163	0.0838766	0.118619
18S_rRNA_M_Locati	1671	G	519	1019	1538	0.684081	0.147518	0.406361	537	1129	1666	0.256849	0	0.204457	36	443	479	1.46185	0.240821	0.594305	0.401707	0.159189
18S_rRNA_M_Locati	1672	A	469	955	1424	0.718908	0.107265	0.418406	506	1037	1543	0.329426	0	0.247916	28	154	182	5.29709	0.598259	0.841927	0.50275	0.24973
18S_rRNA_M_Locati	1673	C	741	1069	1810	0.250893	0	0.200659	1001	1420	2421	0.214304	0	0	35	767	802	0.278899	0	0.21829	0.13965	0.0990092
18S_rRNA_M_Locati	1674	C	903	1313	2216	0.0738385	0	0	984	1376	2360	0.225926	0	0	57	725	782	0.236654	0	0.191564	0.0638547	0.0903042
18S_rRNA_M_Locati	1675	G	873	1049	1922	0.0411336	0	0.0395283	751	910	1661	0.139751	0	0.12268	103	788	891	0.0648231	0	0.060941	0.0743832	0.0352523
18S_rRNA_M_Locati	1676	G	1462	1374	2836	0.375001	0	0	577	1328	1905	0.0447767	0	0	775	1065	1840	0.548899	0	0	0	0
18S_rRNA_M_Locati	1677	G	1172	427	1599	0.140306	0	0.12311	575	969	1544	0.179051	0	0.151943	820	362	1182	0.221245	0	0	0.0916843	0.0658906
18S_rRNA_M_Locati	1678	G	837	97	934	1.03039	0.214395	0.50775	438	407	845	1.2365	0.267952	0.553165	506	157	663	0.533116	0	0.348075	0.469664	0.0879521
18S_rRNA_M_Locati	1679	A	842	338	1180	0.580487	0.0863786	0.367481	424	903	1327	0.373586	0	0.272128	547	249	796	0.308922	0	0.236239	0.291949	0.055382
18S_rRNA_M_Locati	1680	U	989	872	1861	0.0283805	0	0	490	1593	2083	0.180017	0	0	572	498	1070	0.0327939	0	0	0	0
18S_rRNA_M_Locati	1681	U	1247	1366	2613	0.292774	0	0	744	2118	2862	0.426483	0	0	600	641	1241	0.139775	0	0	0	0
18S_rRNA_M_Locati	1682	G	886	814	1700	0.17312	0	0.147647	562	1350	1912	0.0918453	0	0	363	544	907	0.234741	0	0.190283	0.112643	0.0815305
18S_rRNA_M_Locati	1683	A	914	783	1697	0.197291	0	0.164862	440	1136	1576	0.107546	0	0.0971586	358	555	913	0.18309	0	0.154899	0.138973	0.0298459
18S_rRNA_M_Locati	1684	A	858	912	1770	0.178142	0	0.151278	397	1165	1562	0.0859814	0	0.0792206	304	792	1096	0.0597387	0	0	0.0768329	0.0617821
18S_rRNA_M_Locati	1685	A	683	808	1491	0.459949	0	0.315189	376	887	1263	0.331751	0	0.249257	369	587	956	0.0715314	0	0.0668214	0.210423	0.105048
18S_rRNA_M_Locati	1686	C	851	1335	2186	0.0135599	0	0	567	1119	1686	0.0610683	0	0	441	826	1267	0.23244	0	0	0	0
18S_rRNA_M_Locati	1687	U	2192	2165	4357	0.559859	0	0	1276	1295	2571	0.458675	0	0	1055	701	1756	0.498817	0	0	0	0
18S_rRNA_M_Locati	1688	A	678	1442	2120	0.0411703	0	0.0395603	423	863	1286	0.131235	0	0.11609	412	673	1085	0.15886	0	0	0.0518836	0.0481881
18S_rRNA_M_Locati	1689	U	707	2051	2758	0.249648	0	0	626	833	1459	0.0725342	0	0	432	462	894	0.0144382	0	0	0	0
18S_rRNA_M_Locati	1690	U	330	1453	1783	0.196338	0	0.164193	330	453	783	0.829124	0.0994181	0.453607	207	187	394	1.28945	0.247471	0.563838	0.393879	0.168532
18S_rRNA_M_Locati	1691	U	244	953	1197	0.80473	0.0438859	0.446107	165	224	389	2.87538	0.454517	0.742452	144	37	181	3.90549	0.563627	0.79704	0.661866	0.154184
18S_rRNA_M_Locati	1692	C	542	1137	1679	0.23457	0	0.190093	460	626	1086	0.357907	0	0.263751	370	292	662	0.237422	0	0.192103	0.215316	0.0342588
18S_rRNA_M_Locati	1693	C	646	1198	1844	0.07838	0	0.0727197	495	742	1237	0.190926	0	0.160426	571	188	759	0.0282602	0	0.0275188	0.0868882	0.0551764
18S_rRNA_M_Locati	1694	C	1109	2170	3279	0.472629	0	0	978	1068	2046	0.287119	0	0	765	176	941	0.212845	0	0	0	0
18S_rRNA_M_Locati	1695	G	474	360	834	1.36377	0.242555	0.577239	641	408	1049	0.606127	0.0408373	0.377608	473	97	570	0.364935	0	0.267708	0.407518	0.128123
18S_rRNA_M_Locati	1696	A	762	756	1518	0.163082	0	0.140295	1073	1102	2175	0.284952	0	0	642	281	923	0.227874	0	0	0.046765	0.0661358
18S_rRNA_M_Locati	1697	G	719	1131	1850	0.0438382	0	0	1267	1034	2301	0.306473	0	0	565	318	883	0.140913	0	0	0	0
18S_rRNA_M_Locati	1698	A	602	1045	1647	0.0955636	0	0.0872762	941	875	1816	0.0670764	0	0	557	322	879	0.102058	0	0	0.0290921	0.0411424
18S_rRNA_M_Locati	1699	A	506	1107	1613	0.1462	0	0.127621	701	677	1378	0.284635	0	0.221694	470	313	783	0.0441327	0	0.042319	0.130544	0.0732586
18S_rRNA_M_Locati	1700	C	877	2088	2965	0.422125	0	0	1396	1778	3174	0.511391	0	0	723	513	1236	0.366864	0	0	0	0
18S_rRNA_M_Locati	1701	G	438	1117	1555	0.170687	0	0.145881	802	1401	2203	0.278539	0	0	363	299	662	0.281917	0	0.220177	0.122019	0.0914569
18S_rRNA_M_Locati	1702	A	79	351	430	3.71188	0.567713	0.788159	124	172	296	4.92634	0.640712	0.831734	40	72	112	7.18948	0.742971	0.878842	0.832912	0.0370305
18S_rRNA_M_Locati	1703	G	256	2372	2628	0.312907	0	0	227	926	1153	0.348248	0	0.258463	103	927	1030	0.210271	0	0	0.0861542	0.12184
18S_rRNA_M_Locati	1704	G	997	428	1425	0.382655	0	0.276894	892	180	1072	0.381702	0	0.276442	635	98	733	0.17092	0	0.146141	0.233159	0.0615313
18S_rRNA_M_Locati	1705	A	836	1640	2476	0.206921	0	0	858	909	1767	0.16196	0	0	663	379	1042	0.165719	0	0	0	0
18S_rRNA_M_Locati	1706	A	1008	1215	2223	0.0815298	0	0	715	730	1445	0.0708468	0	0.0662023	613	538	1151	0.239352	0	0	0.0220674	0.0312081
18S_rRNA_M_Locati	1707	U	839	1213	2052	0.0353899	0	0	517	882	1399	0.0328016	0	0.0317818	429	559	988	0.127851	0	0	0.0105939	0.0149821
18S_rRNA_M_Locati	1708	U	880	1228	2108	0.0321111	0	0	455	642	1097	0.367395	0	0.268862	294	487	781	0.159363	0	0.13761	0.13549	0.109773
18S_rRNA_M_Locati	1709	C	869	874	1743	0.208544	0	0.17264	608	423	1031	0.522158	0	0.343256	343	364	707	0.316431	0	0.240629	0.252175	0.0701308
18S_rRNA_M_Locati	1710	C	994	947	1941	0.0113228	0	0.0112017	817	428	1245	0.235313	0	0.190612	523	381	904	0.0364886	0	0	0.0672714	0.0873351
18S_rRNA_M_Locati	1711	C	2338	1106	3444	0.506741	0	0	3109	478	3587	0.652028	0	0	1014	534	1548	0.509124	0	0	0	0
18S_rRNA_M_Locati	1712	A	1250	808	2058	0.132006	0	0	1351	493	1844	0.235242	0	0	508	372	880	0.0962795	0	0	0	0
18S_rRNA_M_Locati	1713	G	623	322	945	0.925253	0.073215	0.480852	498	276	774	0.907484	0	0.476071	210	205	415	0.900668	0.116875	0.474469	0.477131	0.00271118
18S_rRNA_M_Locati	1714	U	1893	681	2574	0.369325	0	0	1622	426	2048	0.345301	0	0	497	467	964	0.256822	0	0	0	0
18S_rRNA_M_Locati	1715	A	375	489	864	1.10212	0.0926047	0.524578	612	270	882	0.667006	0	0.400394	102	366	468	0.732504	0	0.423322	0.449431	0.0539549
18S_rRNA_M_Locati	1716	A	11	506	517	2.62267	0.370645	0.724347	228	312	540	1.78934	0.223612	0.641918	4	423	427	1.05849	0.0624294	0.514791	0.627019	0.086197
18S_rRNA_M_Locati	1717	G	56	339	395	3.71712	0.476034	0.788428	371	283	654	1.22475	0.082731	0.550889	11	304	315	1.88998	0.246086	0.654694	0.66467	0.0972311
18S_rRNA_M_Locati	1718	C	1448	793	2241	0.289057	0	0	891	578	1469	0.140665	0	0	294	445	739	0.214024	0	0.17649	0.0588298	0.083198
18S_rRNA_M_Locati	1719	G	824	726	1550	0.147876	0	0.128898	615	455	1070	0.287706	0	0.223587	291	234	525	0.93177	0.168974	0.482815	0.278434	0.1496
18S_rRNA_M_Locati	1720	C	1927	977	2904	0.417912	0	0	1336	986	2322	0.443067	0	0	847	385	1232	0.172821	0	0	0	0
18S_rRNA_M_Locati	1721	A	1479	1212	2691	0.373787	0	0	740	859	1599	0.132875	0	0	1016	733	1749	0.412184	0	0	0	0
18S_rRNA_M_Locati	1722	G	1376	957	2333	0.208017	0	0	498	993	1491	0.0162496	0	0.0160004	894	994	1888	0.414029	0	0	0.00533345	0.00754264
18S_rRNA_M_Locati	1723	G	675	501	1176	0.7371	0.00661002	0.424536	448	329	777	1.17219	0.193774	0.539955	371	517	888	0.455843	0	0.313355	0.425949	0.0925147
18S_rRNA_M_Locati	1724	U	923	541	1464	0.391551	0	0.281515	589	902	1491	0.109085	0	0.0984157	562	941	1503	0.155918	0	0	0.126644	0.116649
18S_rRNA_M_Locati	1725	C	2417	560	2977	0.386494	0	0	1495	1081	2576	0.395085	0	0	778	859	1637	0.219984	0	0	0	0
18S_rRNA_M_Locati	1726	A	711	523	1234	0.652865	0.0708099	0.395184	399	874	1273	0.372859	0	0.271748	431	516	947	0.457208	0.0814518	0.313984	0.326972	0.0512223
18S_rRNA_M_Locati	1727	U	809	522	1331	0.519161	0.0187616	0.341911	608	1081	1689	0.00127548	0	0	697	581	1278	0.057545	0	0.054454	0.132122	0.15
18S_rRNA_M_Locati	1728	C	2201	761	2962	0.395684	0	0	1694	941	2635	0.409707	0	0	1011	540	1551	0.183362	0	0	0	0
18S_rRNA_M_Locati	1729	A	1029	666	1695	0.178498	0	0.151538	839	890	1729	0.0286834	0	0	874	454	1328	0.0448374	0	0	0.0505128	0.0714359
18S_rRNA_M_Locati	1730	G	766	402	1168	0.778785	0.0682178	0.438029	540	518	1058	0.644203	0.0732888	0.392028	702	276	978	0.30967	0	0.236633	0.355563	0.0861677
18S_rRNA_M_Locati	1731	C	959	952	1911	0.0332752	0	0.0322199	615	1073	1688	0.0474706	0	0	712	482	1194	0.00304045	0	0.00303376	0.0117512	0.0145265
18S_rRNA_M_Locati	1732	U	1093	1128	2221	0.14702	0	0	627	1036	1663	0.0766426	0	0	814	385	1199	0.0447407	0	0	0	0
18S_rRNA_M_Locati	1733	U	1524	1391	2915	0.371346	0	0	923	962	1885	0.20912	0	0	929	729	1658	0.360659	0	0	0	0
18S_rRNA_M_Locati	1734	G	588	1027	1615	0.226107	0	0.184504	355	680	1035	0.492074	0.0400777	0.330006	470	393	863	0.26385	0	0.208958	0.241156	0.0636145
18S_rRNA_M_Locati	1735	C	1344	1872	3216	0.473343	0	0	791	1222	2013	0.32716	0	0	862	688	1550	0.403073	0	0	0	0
18S_rRNA_M_Locati	1736	G	664	528	1192	0.613263	0.058666	0.380336	348	458	806	0.855211	0.177869	0.461286	449	59	508	1.24674	0	0.555396	0.465672	0.0715352
18S_rRNA_M_Locati	1737	U	705	185	890	1.09364	0.127095	0.522643	381	487	868	0.648383	0.0232528	0.393619	609	15	624	0.730116	0	0.422395	0.446219	0.0553021
18S_rRNA_M_Locati	1738	U	1099	765	1864	0.081406	0	0	629	950	1579	0.161273	0	0	823	58	881	0.173545	0	0.148024	0.0493413	0.0697792
18S_rRNA_M_Locati	1739	G	688	873	1561	0.0757647	0	0.0704706	441	968	1409	0.0810402	0	0	560	144	704	0.447928	0	0.309661	0.126711	0.132526
18S_rRNA_M_Locati	1740	A	690	956	1646	0.0411185	0	0	424	960	1384	0.0977617	0	0	501	147	648	0.505222	0	0.33599	0.111997	0.158387
18S_rRNA_M_Locati	1741	U	512	1035	1547	0.00636664	0	0.00633042	284	1270	1554	0.217499	0	0	323	210	533	0.848523	0	0.459493	0.155274	0.21513
18S_rRNA_M_Locati	1742	U	1017	1241	2258	0.390856	0	0	807	1172	1979	0.446207	0	0	568	3096	3664	0.842362	0	0	0	0
18S_rRNA_M_Locati	1743	A	22	77	99	15.5553	0.858535	0.940164	19	74	93	12.9915	0.833942	0.929235	8	88	96	9.30034	0.460725	0.90382	0.924406	0.015225
18S_rRNA_M_Locati	1744	A	704	1224	1928	0.21027	0	0	372	1004	1376	0.129	0	0	550	352	902	0.0079242	0	0.00787055	0.00262352	0.00371021
18S_rRNA_M_Locati	1745	G	275	1219	1494	0.0416054	0	0.0399692	141	696	837	0.451432	0	0.311281	159	301	460	1.01302	0	0.503776	0.285009	0.190257
18S_rRNA_M_Locati	1746	U	303	1253	1556	0.00338257	0	0.00337333	249	848	1097	0.0600385	0	0.0566867	161	349	510	0.815134	0	0.449561	0.169874	0.198963
18S_rRNA_M_Locati	1747	C	253	1056	1309	0.221459	0	0.18142	208	835	1043	0.10282	0	0.093315	164	380	544	0.739633	0	0.425615	0.23345	0.140561
18S_rRNA_M_Locati	1748	C	286	1233	1519	0.0560599	0	0.0531171	246	772	1018	0.127543	0	0.113215	223	391	614	0.601933	0	0.376136	0.180823	0.14027
18S_rRNA_M_Locati	1749	C	502	1343	1845	0.130125	0	0	295	960	1255	0.0918701	0	0	478	551	1029	0.146095	0	0	0	0
18S_rRNA_M_Locati	1750	U	881	1519	2400	0.322616	0	0	665	1215	1880	0.394985	0	0	748	541	1289	0.252748	0	0	0	0
18S_rRNA_M_Locati	1751	G	429	872	1301	0.330782	0.0137426	0.248705	283	548	831	0.499626	0.0300835	0.333434	361	289	650	0.678955	0.087105	0.404762	0.328967	0.063788
18S_rRNA_M_Locati	1752	C	616	981	1597	0.0748714	0	0.0696967	381	677	1058	0.170412	0	0.145718	548	591	1139	0.0119688	0	0	0.0718048	0.0595077
18S_rRNA_M_Locati	1753	C	588	978	1566	0.152039	0	0.132047	463	546	1009	0.344356	0	0.256338	780	493	1273	4.36072e-05	0	0	0.129462	0.104666
18S_rRNA_M_Locati	1754	C	781	1003	1784	0.0156676	0	0.0154344	590	741	1331	0.0199449	0	0.0195693	1044	347	1391	0.0250559	0	0	0.0116679	0.00842138
18S_rRNA_M_Locati	1755	U	960	1508	2468	0.238698	0	0	757	1213	1970	0.290631	0	0	1174	772	1946	0.292861	0	0	0	0
18S_rRNA_M_Locati	1756	U	577	821	1398	0.431991	0	0.301822	380	751	1131	0.324902	0	0.245391	783	679	1462	0.0205362	0	0	0.182404	0.131021
18S_rRNA_M_Locati	1757	U	669	756	1425	0.468708	0	0.319282	530	472	1002	0.535571	0	0.349003	620	516	1136	0.287912	0	0.223702	0.297329	0.0534574
18S_rRNA_M_Locati	1758	G	505	1308	1813	0.161534	0	0.139135	389	724	1113	0.393716	0	0.282676	459	935	1394	0.0212585	0	0.0208306	0.147547	0.107063
18S_rRNA_M_Locati	1759	U	1348	1620	2968	0.314345	0	0	1359	1666	3025	0.555398	0	0	916	1878	2794	0.564898	0	0	0	0
18S_rRNA_M_Locati	1760	A	555	1047	1602	0.41936	0	0.295587	422	839	1261	0.240755	0	0.194163	309	1166	1475	0.117066	0	0	0.16325	0.122637
18S_rRNA_M_Locati	1761	C	2320	1668	3988	0.500326	0	0	1958	751	2709	0.507159	0	0	863	639	1502	0.208916	0	0	0	0
18S_rRNA_M_Locati	1762	A	521	781	1302	0.670777	0	0.401661	391	415	806	0.756464	0	0.430978	224	336	560	1.02913	0.110269	0.507625	0.446755	0.044675
18S_rRNA_M_Locati	1763	C	2386	1115	3501	0.449445	0	0	1321	485	1806	0.309721	0	0	724	213	937	0.055295	0	0.0524506	0.0174835	0.0247255
18S_rRNA_M_Locati	1764	A	770	625	1395	0.586246	0	0.369748	413	242	655	1.12049	0.0191495	0.528792	270	170	440	1.27942	0.0936792	0.56185	0.486797	0.0838591
18S_rRNA_M_Locati	1765	C	1452	542	1994	0.0516514	0	0.0491379	776	217	993	0.308249	0	0.235801	492	152	644	0.408389	0	0.290289	0.191743	0.103261
18S_rRNA_M_Locati	1766	C	1714	773	2487	0.209887	0	0	1031	334	1365	0.161599	0	0	436	416	852	0.0849941	0	0	0	0
18S_rRNA_M_Locati	1767	G	809	549	1358	0.572602	0	0.364282	345	261	606	1.0791	0.0297897	0.519433	108	341	449	0.812247	0.0354136	0.448749	0.444155	0.0634236
18S_rRNA_M_Locati	1768	C	15	84	99	20.8309	0.879118	0.954631	9	50	59	20.1826	0.868222	0.953542	6	132	138	5.03653	0.636973	0.835337	0.914503	0.0559804
18S_rRNA_M_Locati	1769	C	1524	683	2207	0.0735205	0	0	931	224	1155	0.0878893	0	0.0808531	395	304	699	0.187651	0	0.158192	0.0796817	0.0645869
18S_rRNA_M_Locati	1770	C	2397	676	3073	0.341947	0	0	1716	518	2234	0.442332	0	0	579	828	1407	0.419358	0	0	0	0
18S_rRNA_M_Locati	1771	G	1412	332	1744	0.306329	0	0.234599	815	180	995	0.51602	0	0.340604	402	402	804	0.18265	0	0.154604	0.243269	0.0761811
18S_rRNA_M_Locati	1772	U	1855	380	2235	0.0421934	0	0.0405026	976	438	1414	0.115092	0	0.103279	614	577	1191	0.195237	0	0	0.0479271	0.0424889
18S_rRNA_M_Locati	1773	C	2132	861	2993	0.224827	0	0	1528	539	2067	0.211369	0	0	611	657	1268	0.213843	0	0	0	0
18S_rRNA_M_Locati	1774	G	1532	450	1982	0.269692	0	0.212492	1025	303	1328	0.369091	0	0.269737	460	457	917	0.176519	0	0.150174	0.210801	0.0488259
18S_rRNA_M_Locati	1775	C	2247	539	2786	0.064761	0	0	1678	557	2235	0.161866	0	0	588	502	1090	0.0290559	0	0.0282607	0.00942023	0.0133222
18S_rRNA_M_Locati	1776	U	2963	978	3941	0.335072	0	0	2184	706	2890	0.314828	0	0	566	989	1555	0.277342	0	0	0	0
18S_rRNA_M_Locati	1777	A	1588	611	2199	0.278753	0	0.218065	1211	559	1770	0.199686	0	0.166527	417	590	1007	0.166953	0	0.143189	0.175927	0.0312823
18S_rRNA_M_Locati	1778	C	2053	902	2955	0.0526312	0	0	1334	745	2079	0.0415705	0	0.0399298	494	596	1090	0.101782	0	0.0924566	0.0441288	0.0378618
18S_rRNA_M_Locati	1779	U	1710	1046	2756	0.0433321	0	0.0415469	1684	891	2575	0.164135	0	0	350	914	1264	0.0575055	0	0	0.013849	0.0195854
18S_rRNA_M_Locati	1780	A	1336	489	1825	0.682877	0.126494	0.405912	976	409	1385	0.693458	0.0920802	0.409667	323	554	877	0.387434	0.0377505	0.279474	0.365018	0.0605077
18S_rRNA_M_Locati	1781	C	2422	597	3019	0.0184731	0	0	1848	440	2288	0.0137226	0	0	780	387	1167	0.00866629	0	0.00859913	0.00286638	0.00405367
18S_rRNA_M_Locati	1782	C	3620	1015	4635	0.417661	0	0	3005	970	3975	0.500657	0	0	1051	646	1697	0.349025	0	0	0	0
18S_rRNA_M_Locati	1783	G	1694	663	2357	0.178348	0	0.151409	1288	442	1730	0.209994	0	0.173633	567	512	1079	0.0324691	0	0.0314763	0.118839	0.0624376
18S_rRNA_M_Locati	1784	A	2016	878	2894	0.0822721	0	0	1556	406	1962	0.015328	0	0.0151042	744	677	1421	0.268003	0	0	0.00503473	0.00712018
18S_rRNA_M_Locati	1785	U	1954	1086	3040	0.155581	0	0	1348	609	1957	0.00999319	0	0	729	553	1282	0.21047	0	0	0	0
18S_rRNA_M_Locati	1786	U	2671	1580	4251	0.460905	0	0	2155	701	2856	0.405254	0	0	415	348	763	0.316361	0.019311	0.240569	0.0801898	0.113405
18S_rRNA_M_Locati	1787	G	1196	709	1905	0.296724	0	0.228918	795	541	1336	0.341245	0	0.254566	162	567	729	0.320213	0.0225624	0.242798	0.242094	0.0104824
18S_rRNA_M_Locati	1788	A	391	712	1103	1.19058	0.217984	0.543725	284	597	881	0.982842	0.131992	0.495957	75	869	944	0.0618812	0	0	0.346561	0.24583
18S_rRNA_M_Locati	1789	G	153	563	716	2.29639	0.383473	0.696933	112	473	585	1.88773	0.327344	0.654094	35	512	547	0.60663	0.120223	0.378009	0.576345	0.141331
18S_rRNA_M_Locati	1790	C	426	1491	1917	0.186798	0	0.157466	280	1066	1346	0.22181	0	0.181652	81	641	722	0.161595	0	0.139281	0.159466	0.0173559
18S_rRNA_M_Locati	1791	G	1003	1583	2586	0.159365	0	0	986	1089	2075	0.251402	0	0	228	557	785	0.0103336	0	0.0102408	0.00341361	0.00482757
18S_rRNA_M_Locati	1792	G	762	755	1517	0.544759	0	0.3528	584	506	1090	0.595814	0.00517886	0.373575	319	279	598	0.332721	0.0563314	0.249969	0.325448	0.0540417
18S_rRNA_M_Locati	1793	C	796	1186	1982	0.134779	0	0.118824	488	737	1225	0.392596	0	0.282082	370	294	664	0.191997	0	0.161275	0.187394	0.0691612
18S_rRNA_M_Locati	1794	U	934	1216	2150	0.0989256	0	0.0900584	915	896	1811	0.0442237	0	0	546	246	792	0.0127224	0	0	0.0300195	0.0424539
18S_rRNA_M_Locati	1795	C	2014	1718	3732	0.361303	0	0	1801	1021	2822	0.38922	0	0	764	372	1136	0.335298	0	0	0	0
18S_rRNA_M_Locati	1796	A	1622	1812	3434	0.249998	0	0	1492	918	2410	0.236592	0	0	678	253	931	0.140021	0	0	0	0
18S_rRNA_M_Locati	1797	G	852	1192	2044	0.379859	0.0262428	0.275386	739	682	1421	0.394554	0	0.283068	557	196	753	0.119128	0	0.106573	0.221675	0.08145
18S_rRNA_M_Locati	1798	U	1369	1907	3276	0.172716	0	0	957	1858	2815	0.364666	0	0	414	455	869	0.0286335	0	0	0	0
18S_rRNA_M_Locati	1799	G	968	1227	2195	0.341601	0.0435663	0.254708	534	974	1508	0.295486	0	0.228206	310	333	643	0.396101	0.08119	0.284035	0.25565	0.022802
18S_rRNA_M_Locati	1800	A	1063	1853	2916	0.00118844	0	0.00118743	501	1449	1950	0.0247622	0	0	252	410	662	0.387934	0.104498	0.279809	0.0936653	0.131624
18S_rRNA_M_Locati	1801	G	954	2652	3606	0.188153	0	0	259	1750	2009	0.0544002	0	0	305	730	1035	0.121257	0	0	0	0
18S_rRNA_M_Locati	1802	G	701	2098	2799	0.0562421	0	0.0532653	279	1145	1424	0.352359	0.0421569	0.260686	297	583	880	0.0589482	0	0.0557264	0.123226	0.0972044
18S_rRNA_M_Locati	1803	U	751	2241	2992	0.0487842	0	0	318	1478	1796	0.0232857	0	0.0227682	347	758	1105	0.179013	0	0	0.00758941	0.010733
18S_rRNA_M_Locati	1804	C	676	2041	2717	0.0419303	0	0.0402572	347	1159	1506	0.240662	0	0.194083	422	577	999	0.0780222	0	0	0.0781132	0.0836334
18S_rRNA_M_Locati	1805	C	1237	2013	3250	0.177009	0	0	524	1137	1661	0.075117	0	0.0699078	417	620	1037	0.13648	0	0	0.0233026	0.0329548
18S_rRNA_M_Locati	1806	U	1189	1627	2816	0.0408906	0	0	639	1107	1746	0.0334733	0	0.032407	507	460	967	0.0874082	0	0	0.0108023	0.0152768
18S_rRNA_M_Locati	1807	C	1456	2237	3693	0.326316	0	0	907	1554	2461	0.312632	0	0	515	715	1230	0.336935	0	0	0	0
18S_rRNA_M_Locati	1808	G	641	1681	2322	0.0497298	0	0.0473933	468	1847	2315	0.295049	0	0	401	535	936	0.167947	0	0	0.0157978	0.0223414
18S_rRNA_M_Locati	1809	G	349	1330	1679	0.391515	0.0359626	0.281479	361	1207	1568	0.0553573	0	0.0524853	281	410	691	0.0787572	0	0.0731053	0.13569	0.103432
18S_rRNA_M_Locati	1810	A	168	1262	1430	0.530445	0.038526	0.346754	172	1215	1387	0.152722	0	0.132571	121	517	638	0.0506173	0	0.0482505	0.175858	0.125649
18S_rRNA_M_Locati	1811	U	193	1847	2040	0.0356688	0	0	271	1205	1476	0.0470473	0	0.0449624	95	361	456	0.367274	0.0546278	0.269049	0.10467	0.117673
18S_rRNA_M_Locati	1812	C	132	2441	2573	0.319477	0	0	238	1671	1909	0.238133	0	0	44	372	416	0.3838	0.00985636	0.277834	0.0926112	0.130972
18S_rRNA_M_Locati	1813	G	31	1865	1896	0.128079	0	0	104	1187	1291	0.110036	0	0.0991976	19	344	363	0.444872	0	0.308484	0.135894	0.128583
18S_rRNA_M_Locati	1814	G	65	889	954	0.634823	0.129588	0.388562	168	576	744	0.852856	0.173569	0.460626	29	244	273	0.747242	0.119574	0.428565	0.425918	0.0294798
18S_rRNA_M_Locati	1815	C	65	949	1014	0.414866	0.0217103	0.293424	136	684	820	0.568859	0.0825036	0.362876	19	413	432	0.0116756	0	0	0.218766	0.157268
18S_rRNA_M_Locati	1816	C	63	1037	1100	0.250328	0	0.200355	132	986	1118	0.0994439	0	0.0905229	14	278	292	0.493629	0.0748231	0.331247	0.207375	0.0984003
18S_rRNA_M_Locati	1817	C	161	1027	1188	0.112952	0	0.101565	237	1258	1495	0.220143	0	0	91	324	415	0.0161859	0	0.0159659	0.0391771	0.0445941
18S_rRNA_M_Locati	1818	C	184	1392	1576	0.222962	0	0	232	1453	1685	0.344497	0	0	84	550	634	0.343325	0	0	0	0
18S_rRNA_M_Locati	1819	G	52	719	771	0.605023	0.124398	0.37726	79	722	801	0.426863	0.0413246	0.299424	35	287	322	0.472927	0.0607014	0.321756	0.332813	0.0327245
18S_rRNA_M_Locati	1820	C	75	943	1018	0.127718	0	0.113352	141	805	946	0.158336	0	0.136818	23	386	409	0.161626	0	0.13943	0.129867	0.0117263
18S_rRNA_M_Locati	1821	C	124	858	982	0.183565	0	0.155228	174	948	1122	0.0457307	0	0	75	363	438	0.129385	0	0.114794	0.0900074	0.0657508
18S_rRNA_M_Locati	1822	C	46	1406	1452	0.24303	0	0	160	1116	1276	0.190203	0	0	14	557	571	0.113248	0	0	0	0
18S_rRNA_M_Locati	1823	G	38	1144	1182	0.0508124	0	0	99	979	1078	0.0524972	0	0	8	521	529	0.0128931	0	0.0127527	0.00425091	0.00601169
18S_rRNA_M_Locati	1824	G	97	1383	1480	0.276487	0	0	160	721	881	0.127072	0	0.112859	41	651	692	0.203303	0	0	0.0376197	0.0532022
18S_rRNA_M_Locati	1825	G	431	786	1217	0.127997	0	0	362	517	879	0.0735227	0	0.0685599	180	497	677	0.133153	0	0	0.0228533	0.0323195
18S_rRNA_M_Locati	1826	G	439	236	675	0.887064	0.0392825	0.470445	516	337	853	0.206414	0	0.171264	163	211	374	0.804148	0.167329	0.446382	0.362697	0.13572
18S_rRNA_M_Locati	1827	C	701	367	1068	0.566573	0	0.36188	625	206	831	0.470393	0	0.320171	364	169	533	0.353787	0.0364524	0.261693	0.314582	0.0410916
18S_rRNA_M_Locati	1828	U	480	336	816	1.29319	0	0.564227	497	260	757	0.729024	0	0.421961	534	223	757	0.0384931	0	0	0.328729	0.239593
18S_rRNA_M_Locati	1829	C	533	497	1030	1.01797	0	0.504694	539	341	880	0.720848	0.0170898	0.419167	405	173	578	0.350259	0.0101618	0.259734	0.394532	0.101511
18S_rRNA_M_Locati	1830	C	543	515	1058	1.15985	0	0.537239	662	256	918	1.17038	0.0612322	0.539521	664	243	907	0.148581	0	0	0.35892	0.253797
18S_rRNA_M_Locati	1831	C	486	546	1032	1.40261	0.0130762	0.584022	655	334	989	1.31052	0.153544	0.567444	832	237	1069	0.267103	0	0	0.383822	0.271488
18S_rRNA_M_Locati	1832	U	1344	2409	3753	0.366853	0	0	852	1623	2475	0.030587	0	0	789	285	1074	0.209798	0	0	0	0
18S_rRNA_M_Locati	1833	U	5486	3225	8711	0.775599	0	0	3147	1074	4221	0.419738	0	0	717	549	1266	0.274936	0	0	0	0
18S_rRNA_M_Locati	1834	A	1588	554	2142	0.284736	0	0.22171	1380	261	1641	0.806462	0	0.446582	332	250	582	0.844978	0.124298	0.458414	0.375569	0.108902
18S_rRNA_M_Locati	1835	C	2898	493	3391	0.243992	0	0	3845	231	4076	0.309721	0	0	450	298	748	0.453716	0.000324202	0.312395	0.104132	0.147264
18S_rRNA_M_Locati	1836	C	1559	646	2205	0.188587	0	0.158725	7509	418	7927	0.693168	0	0	305	384	689	0.661498	0.100275	0.398481	0.185735	0.163796
18S_rRNA_M_Locati	1837	G	1291	561	1852	0.38757	0	0.279424	2643	423	3066	0.0254755	0	0	663	265	928	0.279955	0	0.218906	0.16611	0.120028
18S_rRNA_M_Locati	1838	G	1492	545	2037	0.20048	0	0.167068	2112	432	2544	0.171548	0	0.146477	1353	296	1649	0.278411	0	0	0.104515	0.0743799
18S_rRNA_M_Locati	1839	G	1316	357	1673	0.369581	0	0.269967	1918	344	2262	0.283257	0	0.220809	1609	244	1853	0.33992	0	0	0.163592	0.117405
18S_rRNA_M_Locati	1840	G	1439	165	1604	0.187421	0	0.157922	1912	282	2194	0.239266	0	0.193142	1560	134	1694	0.247788	0	0	0.117021	0.0839864
18S_rRNA_M_Locati	1841	G	1024	134	1158	0.64593	0.128345	0.392647	972	218	1190	1.28037	0.141674	0.561682	854	89	943	0.518373	0.0345649	0.341639	0.431989	0.0940411
18S_rRNA_M_Locati	1842	C	1228	142	1370	0.341608	0.0583536	0.254764	1318	191	1509	0.708462	0	0.414839	1009	54	1063	0.426827	0.0291255	0.299342	0.322982	0.0674543
18S_rRNA_M_Locati	1843	C	1598	76	1674	0.109983	0	0.099139	1872	78	1950	0.14146	0	0.123985	1624	36	1660	0.0994582	0	0	0.0743746	0.05356
18S_rRNA_M_Locati	1844	C	1695	9	1704	0.127566	0	0.113193	1983	78	2061	0.0459209	0	0.0439251	1953	15	1968	0.257491	0	0	0.0523726	0.0465952
18S_rRNA_M_Locati	1845	U	2335	78	2413	0.196875	0	0	2773	147	2920	0.28348	0	0	1437	19	1456	0.0105697	0	0.0104662	0.00348874	0.00493382
18S_rRNA_M_Locati	1846	G	2155	116	2271	0.11586	0	0	2557	144	2701	0.218694	0	0	1332	39	1371	0.0195578	0	0.0191964	0.00639879	0.00904926
18S_rRNA_M_Locati	1847	G	1565	63	1628	0.348973	0.0244198	0.258813	1187	116	1303	0.91665	0.0416201	0.478448	1564	36	1600	0.18029	0	0	0.245754	0.195544
18S_rRNA_M_Locati	1848	U	2267	255	2522	0.143396	0	0	3322	353	3675	0.376167	0	0	2205	61	2266	0.483115	0	0	0	0
18S_rRNA_M_Locati	1849	G	2440	288	2728	0.18965	0	0	1773	405	2178	0.175937	0	0.149673	1082	80	1162	0.0789242	0	0.0732092	0.074294	0.0611084
18S_rRNA_M_Locati	1850	G	1932	375	2307	0.0198922	0	0.0195125	1028	379	1407	1.0096	0.0957231	0.502567	675	130	805	0.537565	0.0452393	0.349904	0.290661	0.201606
18S_rRNA_M_Locati	1851	A	2212	740	2952	0.220706	0	0	1934	749	2683	0.02885	0	0.0280512	685	129	814	0.400136	0	0.286034	0.104695	0.128737
18S_rRNA_M_Locati	1852	G	1131	593	1724	0.438731	0.0655885	0.305066	1164	518	1682	0.799175	0.0528975	0.444336	334	161	495	1.27005	0.193352	0.559978	0.43646	0.104216
18S_rRNA_M_Locati	1853	C	1838	1094	2932	0.204788	0	0	4548	1439	5987	0.560267	0	0	455	450	905	0.146873	0	0.128187	0.042729	0.0604279
18S_rRNA_M_Locati	1854	G	919	732	1651	0.494868	0.0733887	0.331179	1077	588	1665	0.989789	0.111713	0.497584	181	231	412	1.5693	0.241351	0.611366	0.480043	0.115056
18S_rRNA_M_Locati	1855	C	1360	951	2311	0.0131968	0	0.0130305	1571	1291	2862	0.149854	0	0.130364	761	513	1274	0.270562	0	0	0.0477983	0.0586249
18S_rRNA_M_Locati	1856	C	1550	1640	3190	0.317967	0	0	2881	1892	4773	0.332996	0	0	1021	598	1619	0.435494	0	0	0	0
18S_rRNA_M_Locati	1857	G	1011	986	1997	0.127261	0	0.112944	1516	1033	2549	0.391194	0	0.281272	490	359	849	0.221569	0	0.181555	0.191924	0.0691098
18S_rRNA_M_Locati	1858	A	1367	1715	3082	0.303705	0	0	2322	2080	4402	0.20374	0	0	515	459	974	0.161208	0	0.138951	0.0463169	0.0655019
18S_rRNA_M_Locati	1859	G	760	1218	1978	0.182904	0	0.154689	1517	1685	3202	0.165508	0	0.142043	302	629	931	0.361206	0	0.265567	0.187433	0.0554897
18S_rRNA_M_Locati	1860	A	514	956	1470	0.628371	0.0782753	0.38605	1457	2243	3700	0.0448527	0	0	127	863	990	0.396188	0	0.283969	0.22334	0.163331
18S_rRNA_M_Locati	1861	A	461	1280	1741	0.418669	0.0271538	0.295234	1898	2820	4718	0.255365	0	0	116	1278	1394	0.103449	0	0.0938114	0.129682	0.123169
18S_rRNA_M_Locati	1862	G	342	1413	1755	0.498526	0.0586137	0.332804	1352	1679	3031	0.239211	0	0.193087	126	1105	1231	0.438663	0.0296701	0.305083	0.276991	0.0603991
18S_rRNA_M_Locati	1863	A	656	940	1596	0.696563	0.151939	0.410725	1110	1553	2663	0.375175	0	0.272894	371	799	1170	0.658374	0.153313	0.397204	0.360274	0.062033
18S_rRNA_M_Locati	1864	C	1811	2064	3875	0.344218	0	0	2448	3123	5571	0.411578	0	0	1037	1514	2551	0.225514	0	0	0	0
18S_rRNA_M_Locati	1865	G	1705	1637	3342	0.216253	0	0	1476	1526	3002	0.134362	0	0.118482	1208	1202	2410	0.0996267	0	0	0.039494	0.0558529
18S_rRNA_M_Locati	1866	A	1487	1392	2879	0.0461227	0	0	1115	1755	2870	0.157405	0	0.136039	1260	1107	2367	0.000154842	0	0	0.0453465	0.0641296
18S_rRNA_M_Locati	1867	U	1707	1676	3383	0.177443	0	0	1336	2116	3452	0.0939956	0	0	1741	1465	3206	0.231951	0	0	0	0
18S_rRNA_M_Locati	1868	C	2040	2509	4549	0.388574	0	0	1525	2557	4082	0.277721	0	0	2226	1650	3876	0.333686	0	0	0	0
18S_rRNA_M_Locati	1869	G	1384	1340	2724	0.123874	0	0.110256	869	1398	2267	0.392019	0.0169444	0.281708	1496	1198	2694	0.0630921	0	0.0593685	0.150444	0.0951142
18S_rRNA_M_Locati	1870	A	1117	1051	2168	0.436233	0.0579564	0.303832	904	1211	2115	0.459924	0.0294108	0.315135	1362	1064	2426	0.216468	0	0.178008	0.265658	0.0621496
18S_rRNA_M_Locati	1871	A	975	1017	1992	0.504577	0.0485145	0.335473	757	1313	2070	0.399721	0.0240904	0.28567	1483	936	2419	0.210771	0	0.17414	0.265094	0.067452
18S_rRNA_M_Locati	1872	C	1171	1293	2464	0.183151	0	0.154852	1123	1450	2573	0.142726	0	0.124942	1743	1188	2931	0.0090761	0	0	0.0932649	0.0670691
18S_rRNA_M_Locati	1873	U	1200	1615	2815	0.00220565	0	0.00220158	1134	1405	2539	0.158053	0	0.136528	2189	1080	3269	0.140034	0	0	0.0462433	0.0638475
18S_rRNA_M_Locati	1874	C	1595	2707	4302	0.397178	0	0	1684	2180	3864	0.280086	0	0	2379	1716	4095	0.367738	0	0	0	0
18S_rRNA_M_Locati	1875	G	1400	2022	3422	0.252228	0	0	1751	2274	4025	0.322978	0	0	1987	1264	3251	0.238366	0	0	0	0
18S_rRNA_M_Locati	1876	G	767	1271	2038	0.316462	0	0.240478	735	1183	1918	0.588918	0.0526844	0.370762	1276	619	1895	0.30058	0	0.231206	0.280816	0.0637146
18S_rRNA_M_Locati	1877	U	799	993	1792	0.492167	0.0616627	0.329957	870	1335	2205	0.385509	0	0.278335	1534	424	1958	0.170921	0	0.146035	0.251442	0.0774565
18S_rRNA_M_Locati	1878	C	1115	1959	3074	0.199574	0	0	1046	3775	4821	0.431195	0	0	1943	1067	3010	0.336603	0	0	0	0
18S_rRNA_M_Locati	1879	G	495	1427	1922	0.32848	0.0059934	0.247357	457	1777	2234	0.35651	0	0.262901	910	536	1446	0.383114	0.0349735	0.277133	0.262463	0.0121598
18S_rRNA_M_Locati	1880	U	608	1970	2578	0.0592607	0	0	419	2402	2821	0.0437042	0	0.0418884	999	414	1413	0.27524	0	0.215953	0.0859473	0.0935053
18S_rRNA_M_Locati	1881	U	550	1773	2323	0.00489099	0	0.00486927	366	2529	2895	0.0313229	0	0	666	293	959	0.697847	0.12266	0.411271	0.138713	0.192738
18S_rRNA_M_Locati	1882	U	1016	1594	2610	0.151747	0	0	994	2518	3512	0.257586	0	0	842	214	1056	0.371313	0	0.270959	0.0903196	0.127731
18S_rRNA_M_Locati	1883	A	847	1168	2015	0.154211	0	0.133665	671	1907	2578	0.0520055	0	0.0494529	791	280	1071	0.306177	0	0.234575	0.139231	0.0756781
18S_rRNA_M_Locati	1884	G	666	754	1420	0.67587	0.15777	0.403464	429	1403	1832	0.481488	0.0581829	0.325122	794	294	1088	0.229977	0	0.187116	0.305234	0.0894364
18S_rRNA_M_Locati	1885	A	1289	1236	2525	0.104905	0	0	652	2132	2784	0.10772	0	0	1324	325	1649	0.249327	0	0	0	0
18S_rRNA_M_Locati	1886	G	994	1567	2561	0.118046	0	0	638	2165	2803	0.137145	0	0	819	494	1313	0.0106629	0	0	0	0
18S_rRNA_M_Locati	1887	G	756	1625	2381	0.0615496	0	0	365	1465	1830	0.325627	0.00617675	0.245741	452	693	1145	0.176033	0	0.149795	0.131845	0.101123
18S_rRNA_M_Locati	1888	A	712	1214	1926	0.17934	0	0.152135	425	1719	2144	0.0650557	0	0.0611087	362	526	888	0.629634	0.138499	0.386632	0.199959	0.137129
18S_rRNA_M_Locati	1889	A	1309	1732	3041	0.288794	0	0	600	2057	2657	0.182819	0	0	564	1015	1579	0.0528762	0	0	0	0
18S_rRNA_M_Locati	1890	G	514	1084	1598	0.44689	0.0303223	0.308996	302	1268	1570	0.422809	0.0212231	0.297298	292	868	1160	0.396689	0.0416866	0.284196	0.29683	0.01013
18S_rRNA_M_Locati	1891	U	1653	1452	3105	0.306761	0	0	873	2309	3182	0.359472	0	0	883	1406	2289	0.310412	0	0	0	0
18S_rRNA_M_Locati	1892	A	771	976	1747	0.337154	0.00599946	0.252251	349	1194	1543	0.418545	0.035029	0.295187	271	1313	1584	0.0749317	0	0.0697492	0.205729	0.0977369
18S_rRNA_M_Locati	1893	A	830	848	1678	0.364304	0	0.267142	486	1030	1516	0.388911	0	0.280144	330	1271	1601	0.0891524	0	0.0819018	0.209729	0.0905435
18S_rRNA_M_Locati	1894	A	850	1225	2075	0.120809	0	0.107834	549	1014	1563	0.391532	0	0.281497	374	1482	1856	0.0318076	0	0	0.129777	0.115963
18S_rRNA_M_Locati	1895	A	1604	1412	3016	0.262196	0	0	1165	1839	3004	0.336081	0	0	655	2197	2852	0.386373	0	0	0	0
18S_rRNA_M_Locati	1896	G	881	788	1669	0.382502	0	0.276793	766	892	1658	0.254008	0	0.202655	340	1325	1665	0.132353	0	0.116945	0.198798	0.0653148
18S_rRNA_M_Locati	1897	U	1011	986	1997	0.314937	0	0.239599	793	1314	2107	0.0822581	0	0.0760393	407	1579	1986	0.0282391	0	0	0.105213	0.0999673
18S_rRNA_M_Locati	1898	C	1218	2120	3338	0.26477	0	0	903	1560	2463	0.107693	0	0	323	1384	1707	0.122216	0	0.108963	0.0363209	0.0513654
18S_rRNA_M_Locati	1899	G	534	1040	1574	0.721728	0	0.419343	346	1022	1368	0.738982	0	0.42513	58	1427	1485	0.299656	0	0.230685	0.358386	0.090329
18S_rRNA_M_Locati	1900	U	1865	1925	3790	0.344433	0	0	848	2424	3272	0.323098	0	0	182	1990	2172	0.155913	0	0	0	0
18S_rRNA_M_Locati	1901	A	607	1146	1753	0.532212	0	0.347478	475	1208	1683	0.416442	0	0.294129	67	1802	1869	0.0347059	0	0	0.213869	0.152789
18S_rRNA_M_Locati	1902	A	581	807	1388	0.908575	0	0.476229	411	786	1197	0.971387	0	0.492952	44	1460	1504	0.16395	0	0.140937	0.370039	0.162144
18S_rRNA_M_Locati	1903	C	6347	1595	7942	0.768039	0	0	4969	1282	6251	0.722462	0	0	346	2544	2890	0.465045	0	0	0	0
18S_rRNA_M_Locati	1904	A	727	706	1433	0.710104	0	0.41541	946	561	1507	0.439125	0	0.305274	79	1325	1404	0.169957	0	0.145356	0.28868	0.110872
18S_rRNA_M_Locati	1905	A	954	713	1667	0.32027	0	0.24269	1202	615	1817	0.0873243	0	0.0803518	89	1337	1426	0.0869501	0	0.0800462	0.134363	0.0765989
18S_rRNA_M_Locati	1906	G	742	874	1616	0.304659	0	0.233627	965	1054	2019	0.0724147	0	0	47	1375	1422	0.0596158	0	0.0562991	0.096642	0.0995525
18S_rRNA_M_Locati	1907	G	311	840	1151	0.672608	0	0.40234	395	608	1003	0.763369	0	0.433148	61	875	936	0.533808	0.0303487	0.34827	0.394586	0.0350825
18S_rRNA_M_Locati	1908	U	284	1057	1341	0.354711	0	0.261979	478	784	1262	0.286962	0	0.223114	46	1303	1349	0.0459918	0	0	0.161698	0.115433
18S_rRNA_M_Locati	1909	U	263	1009	1272	0.392136	0	0.281838	337	808	1145	0.349564	0	0.259187	9	1271	1280	0.058522	0	0	0.180342	0.127856
18S_rRNA_M_Locati	1910	U	176	739	915	0.585286	0.146903	0.369454	285	712	997	0.252204	0	0.20157	14	1215	1229	0.127669	0	0	0.190341	0.151038
18S_rRNA_M_Locati	1911	C	638	697	1335	0.0307385	0	0.0298435	578	492	1070	0.0887229	0	0.0815626	142	681	823	0.26045	0	0.206832	0.106079	0.0743058
18S_rRNA_M_Locati	1912	C	942	922	1864	0.258338	0	0	900	704	1604	0.348418	0	0	746	797	1543	0.421172	0	0	0	0
18S_rRNA_M_Locati	1913	G	395	666	1061	0.426187	0.00531669	0.299027	286	370	656	0.640081	0.128116	0.390637	238	264	502	0.880053	0.188578	0.468596	0.386087	0.0693007
18S_rRNA_M_Locati	1914	U	600	1094	1694	0.14664	0	0	460	595	1055	0.0703493	0	0	260	402	662	0.296816	0	0.229147	0.0763823	0.108021
18S_rRNA_M_Locati	1915	A	413	1400	1813	0.213598	0	0	426	561	987	0.0669141	0	0	89	467	556	0.394036	0	0.283023	0.0943409	0.133418
18S_rRNA_M_Locati	1916	G	229	1126	1355	0.102581	0	0.0930995	367	691	1058	0.190358	0	0	86	797	883	0.255128	0	0	0.0310332	0.0438875
18S_rRNA_M_Locati	1917	G	109	665	774	1.06581	0.172567	0.51625	113	411	524	0.67437	0.0615909	0.403219	104	323	427	0.485955	0	0.327547	0.415672	0.0775392
18S_rRNA_M_Locati	1918	U	86	2669	2755	0.487409	0	0	123	1027	1150	0.327194	0	0	46	849	895	0.415749	0	0	0	0
18S_rRNA_M_Locati	1919	G	12	1888	1900	0.229043	0	0	41	794	835	0.115417	0	0	16	698	714	0.377467	0	0	0	0
18S_rRNA_M_Locati	1920	A	4	812	816	0.965674	0.153133	0.491575	15	366	381	1.06763	0.225184	0.517008	2	258	260	0.760324	0.11958	0.432865	0.480483	0.0352355
18S_rRNA_M_Locati	1921	A	14	976	990	0.601345	0.0493944	0.375762	28	326	354	1.16479	0.237787	0.538762	6	71	77	4.54217	0.58342	0.821465	0.578663	0.184132
18S_rRNA_M_Locati	1922	C	17	1500	1517	0.0461645	0	0	42	512	554	0.337497	0	0.252675	21	266	287	0.240586	0	0.194474	0.14905	0.108039
18S_rRNA_M_Locati	1923	C	5	1612	1617	0.156483	0	0	19	719	738	0.0381446	0	0	3	280	283	0.0366588	0	0.035483	0.0118277	0.0167269
18S_rRNA_M_Locati	1924	U	0	2097	2097	0.399756	0	0	1	937	938	0.230198	0	0	0	239	239	0.0989352	0	0.0903709	0.0301236	0.0426012
18S_rRNA_M_Locati	1925	G	0	1038	1038	0.193776	0	0.162453	0	609	609	0.307723	0	0.235607	0	147	147	0.490541	0	0.330601	0.242887	0.0688389
18S_rRNA_M_Locati	1926	C	0	1646	1646	0.356837	0	0	0	970	970	0.154629	0	0	0	330	330	0.515408	0	0	0	0
18S_rRNA_M_Locati	1927	G	0	1836	1836	0.466364	0	0	0	766	766	0.175474	0	0.149445	0	245	245	0.352078	0	0	0.0498151	0.0704492
18S_rRNA_M_Locati	1928	G	0	238	238	3.56081	0.551914	0.781458	0	901	901	0.0833087	0	0.0769809	0	13	13	12.6968	0.803567	0.93185	0.596763	0.372634
18S_rRNA_M_Locati	1929	A	0	135	135	6.58243	0.661876	0.868959	0	671	671	0.639765	0.139739	0.390511	0	23	23	6.49583	0.614426	0.871437	0.710302	0.226129
18S_rRNA_M_Locati	1930	A	0	452	452	1.01982	0.0586216	0.505458	0	1012	1012	0.0753428	0	0.0701283	0	82	82	1.05074	0.0260244	0.515398	0.363662	0.207599
18S_rRNA_M_Locati	1931	G	0	802	802	0.0204926	0	0.0201056	0	1548	1548	0.327121	0	0	0	120	120	0.441414	0	0.308003	0.109369	0.140695
18S_rRNA_M_Locati	1932	G	0	572	572	0.545181	0	0.353226	0	1587	1587	0.32365	0	0	0	129	129	0.534957	0	0.350271	0.234499	0.16582
18S_rRNA_M_Locati	1933	A	0	786	786	0.0120712	0	0.0119422	0	921	921	0.198433	0	0.165727	0	205	205	0.0966559	0	0	0.0592232	0.0754674
18S_rRNA_M_Locati	1934	U	0	803	803	0	0	0	0	1598	1598	0	0	0	0	341	341	0	0	0	0	0
18S_rRNA_M_Locati	1935	C	0	1216	1216	0	0	0	0	1811	1811	0	0	0	0	167	167	0	0	0	0	0
18S_rRNA_M_Locati	1936	A	0	694	694	0	0	0	0	537	537	0	0	0	0	229	229	0	0	0	0	0
18S_rRNA_M_Locati	1937	U	0	1242	1242	0	0	0	0	656	656	0	0	0	0	328	328	0	0	0	0	0
18S_rRNA_M_Locati	1938	U	0	1678	1678	0	0	0	0	1018	1018	0	0	0	0	502	502	0	0	0	0	0
18S_rRNA_M_Locati	1939	A	0	40	40	0	0	0	0	50	50	0	0	0	0	23	23	0	0	0	0	0
28S_rRNA_M_Locati	1	C	13093	0	13093	0	0	0	7255	0	7255	0	0	0	2266	0	2266	0	0	0	0	0
28S_rRNA_M_Locati	2	A	1695	0	1695	0	0	0	766	0	766	0	0	0	534	0	534	0	0	0	0	0
28S_rRNA_M_Locati	3	C	2350	0	2350	0	0	0	1734	0	1734	0	0	0	540	0	540	0	0	0	0	0
28S_rRNA_M_Locati	4	G	885	0	885	0	0	0	525	0	525	0	0	0	199	0	199	0	0	0	0	0
28S_rRNA_M_Locati	5	A	591	0	591	0	0	0	357	0	357	0	0	0	202	0	202	0	0	0	0	0
28S_rRNA_M_Locati	6	C	658	0	658	0	0	0	309	0	309	0	0	0	148	0	148	0	0	0	0	0
28S_rRNA_M_Locati	7	C	1047	0	1047	0.896501	0	0.472951	469	0	469	1.6966	0.0603864	0.629659	282	0	282	0.725324	0	0.421261	0.507957	0.0886056
28S_rRNA_M_Locati	8	U	917	0	917	0.576483	0	0.365929	556	0	556	1.24883	0	0.555769	330	0	330	0.58805	0	0.371003	0.4309	0.0883196
28S_rRNA_M_Locati	9	C	4480	0	4480	0.77326	0	0	2575	0	2575	0.562453	0	0	1083	0	1083	0.528854	0	0	0	0
28S_rRNA_M_Locati	10	A	639	0	639	1.15335	0	0.535996	792	0	792	0.749236	0	0.428631	165	0	165	3.0757	0	0.755761	0.573463	0.136152
28S_rRNA_M_Locati	11	G	449	0	449	2.06084	0	0.673781	701	0	701	1.13181	0	0.531271	224	0	224	2.32612	0	0.700285	0.635113	0.0742201
28S_rRNA_M_Locati	12	C	969	0	969	0.403551	0	0.287733	981	0	981	0.80224	0	0.445387	315	0	315	1.7725	0.000729992	0.640046	0.457722	0.144095
28S_rRNA_M_Locati	13	U	833	0	833	0.66191	0	0.39857	920	0	920	1.08762	0	0.521257	565	0	565	0.686808	0	0.407591	0.442473	0.0558305
28S_rRNA_M_Locati	14	C	2869	0	2869	0.597576	0	0	6707	0	6707	0.794675	0	0	2889	0	2889	0.726344	0	0	0	0
28S_rRNA_M_Locati	15	A	975	39	1014	0.340274	0	0.25407	1062	142	1204	0.719557	0	0.418657	1209	5	1214	0.128121	0	0	0.224243	0.172212
28S_rRNA_M_Locati	16	G	717	62	779	0.638946	0	0.390157	1022	167	1189	0.683455	0	0.406186	867	13	880	0.278585	0	0.218079	0.338141	0.0851483
28S_rRNA_M_Locati	17	A	683	54	737	1.2579	0	0.557446	806	159	965	1.22594	0	0.551007	816	30	846	0.492483	0	0.330237	0.479563	0.105622
28S_rRNA_M_Locati	18	C	1512	134	1646	0.222715	0	0.182238	4299	280	4579	0.559272	0	0	1777	29	1806	0.311517	0	0	0.0607461	0.0859079
28S_rRNA_M_Locati	19	G	800	126	926	1.67195	0.0776199	0.625995	751	278	1029	1.53592	0	0.605898	842	111	953	0.446634	0	0.308964	0.513619	0.144945
28S_rRNA_M_Locati	20	A	1172	258	1430	1.01931	0.0566568	0.504956	1069	485	1554	0.77592	0	0.43707	1082	182	1264	0.12339	0	0.109915	0.350647	0.172465
28S_rRNA_M_Locati	21	G	818	457	1275	1.60328	0.306266	0.616055	844	542	1386	0.962653	0.0156912	0.490666	638	495	1133	0.2306	0	0.187522	0.431414	0.179895
28S_rRNA_M_Locati	22	A	768	1715	2483	0.526378	0.125293	0.344945	617	808	1425	1.14128	0.158813	0.533164	530	724	1254	0.193732	0	0.162399	0.346836	0.15137
28S_rRNA_M_Locati	23	A	1063	6150	7213	0.494235	0	0	983	2114	3097	0.00342515	0	0	594	1741	2335	0.383386	0	0	0	0
28S_rRNA_M_Locati	24	G	777	6372	7149	0.435492	0	0	795	5265	6060	0.507485	0	0	356	1212	1568	0.0507896	0	0.048364	0.0161213	0.022799
28S_rRNA_M_Locati	25	A	604	4597	5201	0.0992845	0	0	644	3412	4056	0.182603	0	0	278	547	825	1.26577	0.222071	0.558947	0.186316	0.26349
28S_rRNA_M_Locati	26	C	633	5382	6015	0.198133	0	0	735	3651	4386	0.214497	0	0	342	1687	2029	0.0922879	0	0	0	0
28S_rRNA_M_Locati	27	C	1031	4715	5746	0.132864	0	0	1064	2587	3651	0.00163381	0	0.00163159	484	1220	1704	0.180502	0	0.152979	0.0515367	0.0717333
28S_rRNA_M_Locati	28	C	1590	5134	6724	0.267131	0	0	1352	3506	4858	0.262535	0	0	906	1855	2761	0.270726	0	0	0	0
28S_rRNA_M_Locati	29	G	553	2149	2702	0.971579	0.226256	0.492885	470	1974	2444	0.606421	0.12843	0.377594	671	755	1426	0.593459	0.0772716	0.372598	0.414359	0.0555634
28S_rRNA_M_Locati	30	C	777	3084	3861	0.254034	0	0.202615	415	2751	3166	0.207231	0	0.171703	869	1725	2594	0.15669	0	0	0.124773	0.0891256
28S_rRNA_M_Locati	31	U	887	6206	7093	0.417148	0	0	525	4002	4527	0.208525	0	0	786	2830	3616	0.396698	0	0	0	0
28S_rRNA_M_Locati	32	G	612	3120	3732	0.121764	0	0.108573	343	2658	3001	0.204845	0	0.170065	563	1369	1932	0.261522	0	0.207392	0.16201	0.0407428
28S_rRNA_M_Locati	33	A	754	2849	3603	0.0590794	0	0.0557984	726	2779	3505	0.0295842	0	0	987	1646	2633	0.096406	0	0	0.0185995	0.0263036
28S_rRNA_M_Locati	34	A	655	3002	3657	0.0683191	0	0	401	2532	2933	0.12571	0	0.111706	663	1773	2436	0.0324534	0	0	0.0372352	0.0526585
28S_rRNA_M_Locati	35	U	444	3082	3526	0.118839	0	0	362	3257	3619	0.0896041	0	0	615	1692	2307	0.0423695	0	0.0406642	0.0135547	0.0191693
28S_rRNA_M_Locati	36	U	427	2199	2626	0.141628	0	0.124099	420	3327	3747	0.147765	0	0	769	1556	2325	0.0256186	0	0.0249892	0.049696	0.0535908
28S_rRNA_M_Locati	37	U	727	1985	2712	0.0152599	0	0.015036	901	4088	4989	0.411258	0	0	1268	1654	2922	0.214395	0	0	0.00501199	0.00708802
28S_rRNA_M_Locati	38	A	307	907	1214	1.05931	0.217478	0.514607	338	1205	1543	0.992904	0.0214215	0.498382	748	902	1650	0.415499	0.0188744	0.293661	0.43555	0.100549
28S_rRNA_M_Locati	39	A	577	987	1564	0.420447	0	0.29613	790	1103	1893	0.49763	0	0.332395	1497	974	2471	0.127369	0	0	0.209508	0.148883
28S_rRNA_M_Locati	40	G	268	721	989	1.16544	0.132176	0.538452	212	946	1158	1.45056	0	0.592139	505	537	1042	1.19458	0.202856	0.544569	0.558387	0.0239966
28S_rRNA_M_Locati	41	C	2196	1239	3435	0.51254	0	0	3780	2983	6763	0.700696	0	0	2949	774	3723	0.491825	0	0	0	0
28S_rRNA_M_Locati	42	A	480	870	1350	0.311366	0	0.237571	419	612	1031	1.40652	0	0.584698	874	505	1379	0.491369	0	0.329635	0.383968	0.14683
28S_rRNA_M_Locati	43	U	1066	1175	2241	0.276603	0	0	1199	876	2075	0.0688771	0	0.0644678	2000	713	2713	0.338029	0	0	0.0214893	0.0303904
28S_rRNA_M_Locati	44	A	689	379	1068	0.545349	0	0.353111	588	330	918	1.29697	0	0.564911	1434	431	1865	0.0727343	0	0	0.306007	0.233017
28S_rRNA_M_Locati	45	U	312	505	817	1.04599	0.095146	0.511545	330	411	741	1.83772	0	0.647912	458	259	717	1.45466	0.164533	0.592948	0.584135	0.0560192
28S_rRNA_M_Locati	46	U	999	993	1992	0.243296	0	0	2278	884	3162	0.438957	0	0	1282	1114	2396	0.405043	0	0	0	0
28S_rRNA_M_Locati	47	A	521	423	944	0.809359	0.0447579	0.44758	457	576	1033	1.16717	0	0.53881	576	606	1182	0.292608	0	0.226519	0.404303	0.131113
28S_rRNA_M_Locati	48	C	697	809	1506	0.0543169	0	0.051551	961	537	1498	0.312734	0	0.238352	554	354	908	0.503239	0	0.335015	0.208306	0.117658
28S_rRNA_M_Locati	49	U	1287	1142	2429	0.377869	0	0	2040	832	2872	0.349878	0	0	442	792	1234	0.0292488	0	0.02844	0.00947999	0.0134067
28S_rRNA_M_Locati	50	A	459	622	1081	0.632399	0	0.387624	606	740	1346	0.556727	0	0.357797	223	575	798	0.611083	0	0.379595	0.375005	0.0126018
28S_rRNA_M_Locati	51	A	434	993	1427	0.326105	0	0.246042	762	933	1695	0.289616	0	0.224678	187	708	895	0.458011	0	0.314375	0.261698	0.0382554
28S_rRNA_M_Locati	52	G	640	634	1274	0.595451	0.0539109	0.373402	666	811	1477	0.562991	0	0.360357	424	492	916	0.501684	0	0.334324	0.356027	0.0162445
28S_rRNA_M_Locati	53	C	1564	1199	2763	0.310247	0	0	4321	1500	5821	0.699092	0	0	547	1051	1598	0.1982	0	0	0	0
28S_rRNA_M_Locati	54	G	850	1230	2080	0.0108174	0	0	720	1001	1721	0.292147	0	0.226196	524	448	972	0.457417	0.0189313	0.314076	0.180091	0.132301
28S_rRNA_M_Locati	55	G	773	723	1496	0.438566	0	0.305005	639	514	1153	0.940189	0	0.484803	670	384	1054	0.405298	0.0158139	0.288602	0.35947	0.0888765
28S_rRNA_M_Locati	56	A	1456	2127	3583	0.466688	0	0	1162	1082	2244	0.0947389	0	0	1083	1375	2458	0.432276	0	0	0	0
28S_rRNA_M_Locati	57	G	1142	2210	3352	0.418295	0	0	869	1750	2619	0.249627	0	0	696	1595	2291	0.353844	0	0	0	0
28S_rRNA_M_Locati	58	G	876	1100	1976	0.0455685	0	0.0436036	604	1184	1788	0.124433	0	0.110718	422	1238	1660	0.0426249	0	0	0.0514406	0.0455389
28S_rRNA_M_Locati	59	A	783	868	1651	0.238479	0	0.192652	678	908	1586	0.246293	0	0.19772	393	974	1367	0.206595	0	0.171325	0.187233	0.0114368
[truncated: 4,370 more rows]

## Sheet: 32 cell
Data_handling_v3			ACTAGA_zbf_32 cell_1_M						AGCTTG_zbf_32 cell_2_M						CGCAAT_zbf_32 cell_3_M						Average
RNA	Position	Nucl	5'_reads	3'_reads	5'+3'	v5_score	v6_score	Meth%	5'_reads	3'_reads	5'+3'	v5_score	v6_score	Meth%	5'_reads	3'_reads	5'+3'	v5_score	v6_score	Meth%	Av.Meth%	Std.dev.
18S_rRNA_M_Locati	1	U	176	0	176	0	0	0	395	0	395	0	0	0	1360	0	1360	0	0	0	0	0
18S_rRNA_M_Locati	2	A	148	0	148	0	0	0	203	0	203	0	0	0	813	0	813	0	0	0	0	0
18S_rRNA_M_Locati	3	C	143	0	143	0	0	0	363	0	363	0	0	0	1214	0	1214	0	0	0	0	0
18S_rRNA_M_Locati	4	C	387	0	387	0	0	0	999	0	999	0	0	0	2472	0	2472	0	0	0	0	0
18S_rRNA_M_Locati	5	U	520	0	520	0	0	0	821	0	821	0	0	0	1399	0	1399	0	0	0	0	0
18S_rRNA_M_Locati	6	G	318	0	318	0	0	0	555	0	555	0	0	0	686	0	686	0	0	0	0	0
18S_rRNA_M_Locati	7	G	125	0	125	1.05397	0.0592678	0.515128	278	0	278	0.374034	0	0.272928	371	0	371	1.0773	0.0492369	0.519278	0.435778	0.115165
18S_rRNA_M_Locati	8	U	204	0	204	0.353008	0	0.26185	330	0	330	0.0121853	0	0.0120746	432	0	432	0.470849	0	0.320624	0.198183	0.133768
18S_rRNA_M_Locati	9	U	318	0	318	0.0913619	0	0.0839548	241	0	241	0.311295	0	0.238145	297	0	297	0.915921	0	0.478897	0.266999	0.16252
18S_rRNA_M_Locati	10	G	199	0	199	0.968611	0	0.493281	138	0	138	1.03869	0.0130408	0.511293	160	0	160	1.97681	0	0.665459	0.556677	0.0772706
18S_rRNA_M_Locati	11	A	123	0	123	2.68566	0.178318	0.730276	66	0	66	2.3529	0.224579	0.704889	79	0	79	3.30681	0.232913	0.770044	0.73507	0.0268147
18S_rRNA_M_Locati	12	U	137	0	137	3.15556	0.318526	0.760685	52	0	52	2.95639	0.0942184	0.750825	84	0	84	2.63804	0.178472	0.727479	0.74633	0.0139238
18S_rRNA_M_Locati	13	C	260	0	260	2.04789	0.121169	0.67275	80	0	80	1.83882	0	0.65057	145	0	145	1.38333	0	0.582092	0.635138	0.0385861
18S_rRNA_M_Locati	14	C	764	0	764	0.169717	0	0.145255	102	0	102	1.32082	0	0.571509	200	0	200	0.852128	0	0.46132	0.392694	0.180657
18S_rRNA_M_Locati	15	U	1651	1	1652	0.396505	0	0	222	0	222	0.155456	0	0.135065	450	1	451	0.0872173	0	0	0.0450216	0.0636702
18S_rRNA_M_Locati	16	G	449	0	449	1.9937	0.19698	0.66646	38	0	38	7.26268	0.612879	0.88171	169	1	170	2.15075	0.263378	0.683884	0.744018	0.0976223
18S_rRNA_M_Locati	17	C	1019	0	1019	0.462004	0	0.31622	144	0	144	1.63295	0.23501	0.621827	306	6	312	1.02797	0.149579	0.507697	0.481914	0.126089
18S_rRNA_M_Locati	18	C	2047	1	2048	0.194556	0	0	715	0	715	0.289525	0	0	901	6	907	0.114562	0	0	0	0
18S_rRNA_M_Locati	19	A	3567	1	3568	0.521705	0	0	942	0	942	0.271285	0	0	1364	1	1365	0.265788	0	0	0	0
18S_rRNA_M_Locati	20	G	1370	0	1370	0.5	0	0.333495	239	0	239	3.48611	0.132623	0.777812	485	3	488	1.6838	0.149912	0.627872	0.579727	0.184559
18S_rRNA_M_Locati	21	U	2343	3	2346	0.175212	0	0	605	0	605	0.877594	0	0.467815	1158	6	1164	0.134649	0	0.11876	0.195525	0.198549
18S_rRNA_M_Locati	22	A	2416	15	2431	0.221569	0	0	594	0	594	1.13684	0	0.532439	1251	42	1293	0.164546	0	0.14139	0.22461	0.225192
18S_rRNA_M_Locati	23	A	2164	3	2167	0.0779418	0	0	907	0	907	0.538669	0	0.350338	1309	11	1320	0.36104	0	0.265415	0.205251	0.149218
18S_rRNA_M_Locati	24	U	3309	12	3321	0.42146	0	0	2930	4	2934	0.553046	0	0	3368	31	3399	0.451467	0	0	0	0
18S_rRNA_M_Locati	25	A	2695	4	2699	0.299025	0	0	2777	3	2780	0.506001	0	0	3267	37	3304	0.376208	0	0	0	0
18S_rRNA_M_Locati	26	U	712	36	748	1.54002	0.184407	0.606622	4337	28	4365	0.731768	0	0	2018	255	2273	0.0397928	0	0.0382861	0.214969	0.277381
18S_rRNA_M_Locati	27	A	15	2	17	104.013	0.967266	0.991002	30	1	31	50.1104	0.896697	0.981034	35	11	46	57.3494	0.946132	0.98322	0.985085	0.00427751
18S_rRNA_M_Locati	28	U	837	118	955	0.730939	0	0.422534	770	47	817	0.807036	0	0.44691	1272	1348	2620	0.0320658	0	0	0.289815	0.205171
18S_rRNA_M_Locati	29	G	2295	54	2349	0.405981	0	0	1255	15	1270	0.0792814	0	0.0735112	3105	876	3981	0.349291	0	0	0.0245037	0.0346535
18S_rRNA_M_Locati	30	C	2791	147	2938	0.579672	0	0	1277	152	1429	0.107133	0	0	2535	1741	4276	0.377004	0	0	0	0
18S_rRNA_M_Locati	31	U	970	282	1252	0.0269664	0	0.0262787	448	150	598	0.995715	0	0.499344	422	2321	2743	0.0050656	0	0.00504189	0.176888	0.228176
18S_rRNA_M_Locati	32	U	248	420	668	0.873426	0	0.466591	418	272	690	0.502267	0	0.334662	86	3468	3554	0.291421	0	0	0.267084	0.196387
18S_rRNA_M_Locati	33	G	513	135	648	0.972933	0	0.493526	392	142	534	0.630177	0.0474165	0.387013	354	1144	1498	0.775858	0	0.437056	0.439198	0.0435099
18S_rRNA_M_Locati	34	U	538	148	686	0.953275	0.124775	0.488403	513	243	756	0.190489	0	0.160187	754	967	1721	0.529475	0	0.346312	0.331634	0.134395
18S_rRNA_M_Locati	35	C	819	293	1112	0.157173	0	0.13593	530	457	987	0.105072	0	0	842	3458	4300	0.493588	0	0	0.0453101	0.0640782
18S_rRNA_M_Locati	36	U	957	172	1129	0.070295	0	0.0657325	781	207	988	0.0980452	0	0	1707	1090	2797	0.255611	0	0	0.0219108	0.0309866
18S_rRNA_M_Locati	37	C	839	541	1380	0.190667	0	0	773	96	869	0.0591699	0	0.0559251	775	909	1684	0.151091	0	0.131327	0.0624173	0.0538102
18S_rRNA_M_Locati	38	A	958	381	1339	0.0991957	0	0	668	219	887	0.143206	0	0.12539	644	221	865	1.17383	0.179229	0.540269	0.221886	0.230877
18S_rRNA_M_Locati	39	A	1324	245	1569	0.218033	0	0	690	308	998	0.0439996	0	0.0421856	1022	173	1195	0.356057	0	0.26273	0.101639	0.115203
18S_rRNA_M_Locati	40	A	1236	290	1526	0.147122	0	0	638	375	1013	0.0820403	0	0.0758892	1058	192	1250	0.225935	0	0.184416	0.0867685	0.0756796
18S_rRNA_M_Locati	41	G	719	299	1018	0.358881	0.00135663	0.264291	526	400	926	0.200156	0	0.166925	804	424	1228	0.140656	0	0.1234	0.184872	0.0589021
18S_rRNA_M_Locati	42	A	582	260	842	0.741927	0.137884	0.426213	630	646	1276	0.166858	0	0	638	136	774	0.623857	0	0.384488	0.270234	0.191842
18S_rRNA_M_Locati	43	U	846	557	1403	0.139403	0	0.122424	924	490	1414	0.247617	0	0	873	300	1173	0.0128336	0	0	0.0408081	0.0577113
18S_rRNA_M_Locati	44	U	1312	1044	2356	0.288168	0	0	1720	266	1986	0.498261	0	0	1529	199	1728	0.361686	0	0	0	0
18S_rRNA_M_Locati	45	A	664	397	1061	1.10579	0.0262398	0.525353	699	217	916	0.311462	0	0.23769	609	82	691	1.17521	0	0.540633	0.434559	0.139347
18S_rRNA_M_Locati	46	A	1207	492	1699	0.362712	0	0.266284	978	156	1134	0.0115516	0	0.0114297	1051	124	1175	0.277901	0	0.217611	0.165108	0.110469
18S_rRNA_M_Locati	47	G	397	589	986	1.73404	0.221113	0.634476	197	262	459	1.77809	0.233529	0.640542	222	143	365	4.03947	0.415411	0.802001	0.69234	0.0775818
18S_rRNA_M_Locati	48	C	867	1288	2155	0.332349	0	0.249533	370	211	581	1.21863	0.120907	0.549698	396	947	1343	0.494304	0	0.330957	0.376729	0.126744
18S_rRNA_M_Locati	49	C	2062	2267	4329	0.30786	0	0	743	457	1200	0.0907762	0	0.0832852	1435	552	1987	0.166505	0	0.1428	0.0753616	0.0585663
18S_rRNA_M_Locati	50	A	2254	1650	3904	0.155743	0	0	484	473	957	0.429332	0	0.300592	1371	378	1749	0.499378	0	0.333184	0.211259	0.149974
18S_rRNA_M_Locati	51	U	4791	2669	7460	0.587197	0	0	1396	1312	2708	0.551233	0	0	4626	1194	5820	0.574867	0	0	0	0
18S_rRNA_M_Locati	52	G	711	1241	1952	0.96653	0.0372531	0.491618	120	475	595	1.61644	0.202262	0.618198	396	701	1097	2.06559	0.291665	0.673999	0.594605	0.0763028
18S_rRNA_M_Locati	53	C	2335	2015	4350	0.170112	0	0	414	1681	2095	0.324459	0	0	2871	1628	4499	0.279827	0	0	0	0
18S_rRNA_M_Locati	54	A	2319	1243	3562	0.0448592	0	0.0429448	330	914	1244	0.260785	0	0.206975	3318	894	4212	0.165622	0	0	0.0833067	0.0891872
18S_rRNA_M_Locati	55	A	2406	2279	4685	0.248399	0	0	775	1739	2514	0.427157	0	0	3693	1512	5205	0.330919	0	0	0	0
18S_rRNA_M_Locati	56	G	1458	1742	3200	0.0770488	0	0.0715578	299	880	1179	0.322731	0	0.244145	1745	1334	3079	0.203543	0	0.169165	0.161623	0.0706599
18S_rRNA_M_Locati	57	U	2118	1942	4060	0.229473	0	0	526	1530	2056	0.30995	0	0	3187	1491	4678	0.251982	0	0	0	0
18S_rRNA_M_Locati	58	C	1445	936	2381	0.19868	0	0.165807	352	1573	1925	0.329341	0	0	2168	2110	4278	0.247093	0	0	0.055269	0.0781622
18S_rRNA_M_Locati	59	U	1085	1463	2548	0.0623948	0	0.0587521	347	602	949	0.480105	0.0422875	0.324603	1657	2030	3687	0.126573	0	0	0.127785	0.141223
18S_rRNA_M_Locati	60	A	858	1153	2011	0.233471	0	0.189356	415	593	1008	0.266358	0	0.210499	1769	1176	2945	0.00885193	0	0.00877721	0.136211	0.0905216
18S_rRNA_M_Locati	61	A	896	1449	2345	0.0253481	0	0	278	609	887	0.49517	0	0.331429	595	1455	2050	0.374874	0.0273182	0.272757	0.201396	0.144409
18S_rRNA_M_Locati	62	G	551	1046	1597	0.320713	0	0.242949	102	745	847	0.460535	0	0.315574	334	1375	1709	0.474873	0.0268535	0.322103	0.293542	0.0358741
18S_rRNA_M_Locati	63	U	860	1256	2116	0.0837611	0	0	192	682	874	0.46066	0	0.315625	472	1983	2455	0.0672503	0	0	0.105208	0.148787
18S_rRNA_M_Locati	64	G	188	411	599	2.3603	0.452456	0.702756	45	714	759	0.800146	0.0493658	0.444815	172	888	1060	1.23558	0.175466	0.552923	0.566831	0.105762
18S_rRNA_M_Locati	65	C	423	1451	1874	0.00810667	0	0.00804573	115	1530	1645	0.20241	0	0	392	1805	2197	0.0414367	0	0	0.00268191	0.0037928
18S_rRNA_M_Locati	66	A	249	825	1074	1.01424	0.132553	0.503768	95	589	684	1.23436	0.199666	0.552805	322	605	927	1.45776	0.243911	0.593385	0.549986	0.0366403
18S_rRNA_M_Locati	67	C	1006	1633	2639	0.0405345	0	0	655	2009	2664	0.409523	0	0	840	1358	2198	0.142999	0	0.125159	0.0417196	0.0590004
18S_rRNA_M_Locati	68	A	508	692	1200	1.69272	0.143364	0.628823	409	518	927	1.14844	0.0851424	0.534815	602	526	1128	1.6174	0.208942	0.618151	0.593929	0.0420266
18S_rRNA_M_Locati	69	C	1068	1287	2355	0.467643	0	0.318728	975	999	1974	0.0156737	0	0.0154395	1008	1427	2435	0.236312	0	0.191206	0.175124	0.124338
18S_rRNA_M_Locati	70	G	1540	1211	2751	0.425767	0	0.298699	2145	846	2991	0.305567	0	0	2198	2307	4505	0.321655	0	0	0.0995664	0.140808
18S_rRNA_M_Locati	71	G	1931	852	2783	0.600842	0.00318447	0.375413	895	872	1767	0.323718	0	0.244657	1149	963	2112	0.700762	0	0.412143	0.344071	0.071878
18S_rRNA_M_Locati	72	C	3897	1391	5288	0.0767883	0	0	1299	457	1756	0.541105	0	0.351245	2639	1206	3845	0.0302883	0	0	0.117082	0.165578
18S_rRNA_M_Locati	73	C	9227	1363	10590	0.556928	0	0	4409	454	4863	0.490504	0	0	7385	1379	8764	0.619612	0	0	0	0
18S_rRNA_M_Locati	74	G	6890	1893	8783	0.432538	0	0	2251	1016	3267	0.208949	0	0	3972	1224	5196	0.280174	0	0	0	0
18S_rRNA_M_Locati	75	G	2594	963	3557	0.599347	0	0.374811	618	939	1557	0.772507	0	0.435985	1491	734	2225	0.851472	0	0.460001	0.423599	0.0358646
18S_rRNA_M_Locati	76	U	5448	1124	6572	0.207828	0	0	1621	1273	2894	0.142207	0	0	3581	897	4478	0.163087	0	0	0	0
18S_rRNA_M_Locati	77	A	4494	634	5128	0.0132796	0	0.0131081	1287	462	1749	0.400267	0	0.285967	2419	398	2817	0.313315	0	0.238633	0.179236	0.119049
18S_rRNA_M_Locati	78	C	8203	1429	9632	0.536345	0	0	4995	2223	7218	0.771678	0	0	4636	1014	5650	0.432643	0	0	0	0
18S_rRNA_M_Locati	79	A	1907	1957	3864	0.230036	0	0.187055	647	847	1494	0.394129	0	0.282842	1283	767	2050	0.659992	0.0322568	0.397704	0.2892	0.0861147
18S_rRNA_M_Locati	80	G	461	945	1406	2.13002	0.348172	0.680668	137	161	298	5.15485	0.411714	0.837982	463	1283	1746	0.742263	0.0816015	0.426174	0.648275	0.169673
18S_rRNA_M_Locati	81	U	872	2015	2887	0.337639	0	0.252479	197	425	622	1.4499	0	0.592208	742	2276	3018	0.084638	0	0	0.281563	0.242641
18S_rRNA_M_Locati	82	G	636	501	1137	2.41631	0.338799	0.707468	113	179	292	3.86796	0	0.795132	462	1596	2058	0.376407	0	0.273567	0.592056	0.228031
18S_rRNA_M_Locati	83	A	658	1443	2101	0.659568	0	0.397547	249	518	767	0.567781	0	0.362457	546	1304	1850	0.556594	0	0.357696	0.372567	0.0177706
18S_rRNA_M_Locati	84	A	654	2663	3317	0.0694026	0	0	171	267	438	1.50208	0.119632	0.600879	300	1329	1629	0.750095	0	0.428753	0.343211	0.252655
18S_rRNA_M_Locati	85	A	802	2885	3687	0.292432	0	0	159	379	538	0.334653	0	0.25109	432	2422	2854	0.118015	0	0	0.0836968	0.118365
18S_rRNA_M_Locati	86	C	1126	2354	3480	0.288321	0	0	246	640	886	0.273744	0	0	376	3075	3451	0.299868	0	0	0	0
18S_rRNA_M_Locati	87	U	1150	3866	5016	0.556862	0	0	289	372	661	0.0327795	0	0.0317856	520	3251	3771	0.38665	0	0	0.0105952	0.0149839
18S_rRNA_M_Locati	88	G	800	1501	2301	0.0226808	0	0.0221872	674	496	1170	0.436683	0	0	785	1427	2212	0.0648541	0	0.0609301	0.0277058	0.0251788
18S_rRNA_M_Locati	89	C	955	1380	2335	0.0393075	0	0	415	966	1381	0.512558	0	0	630	4555	5185	0.634713	0	0	0	0
18S_rRNA_M_Locati	90	G	122	647	769	1.99124	0.373806	0.66598	56	191	247	2.34637	0.305479	0.702015	79	1191	1270	0.751071	0.0549206	0.429114	0.599036	0.12105
18S_rRNA_M_Locati	91	A	645	618	1263	0.683905	0.00515611	0.406333	239	182	421	1.06014	0.0910262	0.515188	270	774	1044	1.06255	0.129937	0.515403	0.478975	0.0513654
18S_rRNA_M_Locati	92	A	399	505	904	1.29203	0.140762	0.563978	433	111	544	0.663078	0.0225849	0.399146	313	473	786	1.60052	0.209613	0.615763	0.526295	0.0923605
18S_rRNA_M_Locati	93	U	234	781	1015	0.844816	0	0.458185	148	190	338	1.74467	0.243333	0.636342	143	566	709	1.55778	0.0408632	0.609371	0.567966	0.0784039
18S_rRNA_M_Locati	94	G	409	893	1302	0.31152	0	0.237665	735	470	1205	0.244021	0	0	391	852	1243	0.294168	0	0.227444	0.155036	0.109707
18S_rRNA_M_Locati	95	G	1107	587	1694	0.0439266	0	0.042102	857	216	1073	0.0375647	0	0	743	643	1386	0.161684	0	0.139267	0.0604564	0.058318
18S_rRNA_M_Locati	96	C	1617	740	2357	0.24026	0	0	950	384	1334	0.197337	0	0	934	798	1732	0.158146	0	0	0	0
18S_rRNA_M_Locati	97	U	1967	1101	3068	0.377883	0	0	1189	336	1525	0.237149	0	0	1524	712	2236	0.326459	0	0	0	0
18S_rRNA_M_Locati	98	C	523	2364	2887	0.309249	0	0	442	782	1224	0.0262857	0	0.0256329	247	1850	2097	0.254316	0	0	0.00854429	0.0120834
18S_rRNA_M_Locati	99	A	69	109	178	12.5366	0.801416	0.926508	29	382	411	2.4182	0.367903	0.707951	15	89	104	16.6771	0.84181	0.943938	0.859466	0.107373
18S_rRNA_M_Locati	100	U	840	1250	2090	0.204735	0	0.170009	582	1115	1697	0.157218	0	0	441	1277	1718	0.0940857	0	0.0860406	0.0853499	0.0694077
18S_rRNA_M_Locati	101	U	1159	2157	3316	0.124513	0	0	548	1901	2449	0.369361	0	0	403	2340	2743	0.272494	0	0	0	0
18S_rRNA_M_Locati	102	A	913	1887	2800	0.126161	0	0.112063	346	1329	1675	0.0134381	0	0.0132677	345	2021	2366	0.0996432	0	0	0.041777	0.0499942
18S_rRNA_M_Locati	103	A	1144	2149	3293	0.0140963	0	0	284	1236	1520	0.139674	0	0.122627	503	1863	2366	0.0904943	0	0	0.0408757	0.0578069
18S_rRNA_M_Locati	104	A	387	1174	1561	1.41308	0.0968445	0.585748	148	695	843	1.28364	0.0765267	0.562394	119	998	1117	1.20784	0.0675423	0.547291	0.565144	0.0158199
18S_rRNA_M_Locati	105	U	1120	1348	2468	0.612362	0	0.379887	362	734	1096	0.833111	0	0.454705	275	1174	1449	0.770291	0	0.435291	0.423294	0.0317003
18S_rRNA_M_Locati	106	C	2253	3889	6142	0.311847	0	0	1377	1698	3075	0.350152	0	0	1186	2925	4111	0.374149	0	0	0	0
18S_rRNA_M_Locati	107	A	4944	4522	9466	0.557459	0	0	2306	1927	4233	0.542752	0	0	2370	2232	4602	0.411326	0	0	0	0
18S_rRNA_M_Locati	108	G	1355	1344	2699	0.891909	0	0.471526	582	790	1372	0.634102	0	0.388216	788	1120	1908	0.613218	0	0.380244	0.413329	0.04128
18S_rRNA_M_Locati	109	U	769	2092	2861	0.822323	0	0.451336	338	652	990	1.31742	0.10169	0.568734	274	990	1264	1.53375	0.219025	0.605518	0.541863	0.0657496
18S_rRNA_M_Locati	110	U	2058	4463	6521	0.280894	0	0	1392	1608	3000	0.334899	0	0	893	3664	4557	0.396629	0	0	0	0
18S_rRNA_M_Locati	111	A	1339	3970	5309	0.0827788	0	0	819	1431	2250	0.0783997	0	0	505	2601	3106	0.059593	0	0	0	0
18S_rRNA_M_Locati	112	U	2187	7015	9202	0.52995	0	0	978	2443	3421	0.430038	0	0	954	3567	4521	0.405524	0	0	0	0
18S_rRNA_M_Locati	113	G	1204	4223	5427	0.191925	0	0	945	1245	2190	0.11209	0	0	552	3536	4088	0.397025	0	0	0	0
18S_rRNA_M_Locati	114	G	844	2862	3706	0.076411	0	0.0710046	811	725	1536	0.179079	0	0.151964	430	2359	2789	0.180793	0	0	0.074323	0.0620835
18S_rRNA_M_Locati	115	U	837	2772	3609	0.00993229	0	0.0098373	904	634	1538	0.0920944	0	0.0843785	364	1891	2255	0.0729561	0	0	0.0314053	0.0376724
18S_rRNA_M_Locati	116	U	34	137	171	20.4993	0.860886	0.953745	32	34	66	25.0884	0.876385	0.962219	10	37	47	43.4435	0.939186	0.977958	0.964641	0.0100322
18S_rRNA_M_Locati	117	C	864	1825	2689	0.0799835	0	0.0740854	828	332	1160	0.229199	0	0.186593	512	720	1232	0.344291	0	0.256268	0.172315	0.0750579
18S_rRNA_M_Locati	118	C	1829	1040	2869	0.136682	0	0	1457	983	2440	0.537644	0	0	733	547	1280	0.0932258	0	0.0853368	0.0284456	0.0402282
18S_rRNA_M_Locati	119	U	1291	1150	2441	0.165042	0	0	1238	306	1544	0.300877	0	0	514	290	804	0.514534	0	0.34001	0.113337	0.160282
18S_rRNA_M_Locati	120	U	1062	797	1859	0.0508303	0	0	1248	137	1385	0.307255	0	0	579	133	712	0.396478	0	0.284198	0.0947328	0.133972
18S_rRNA_M_Locati	121	U	55	109	164	9.91906	0.713974	0.908921	45	15	60	17.0814	0.757641	0.945552	23	14	37	26.1421	0.844604	0.964092	0.939522	0.0229232
18S_rRNA_M_Locati	122	G	454	496	950	0.668863	0	0.401042	372	45	417	1.57307	0	0.611929	323	278	601	0.598007	0	0.37461	0.462527	0.106193
18S_rRNA_M_Locati	123	A	480	602	1082	0.494727	0	0.331186	300	131	431	1.75211	0.126507	0.637178	540	488	1028	0.0053234	0	0.00530033	0.324555	0.258006
18S_rRNA_M_Locati	124	U	351	748	1099	0.453586	0	0.312241	236	184	420	2.02877	0.239861	0.670358	452	226	678	0.803796	0.0310682	0.445978	0.476193	0.147753
18S_rRNA_M_Locati	125	C	288	2250	2538	0.468907	0	0	159	1353	1512	0.245627	0	0	422	1356	1778	0.359134	0	0	0	0
18S_rRNA_M_Locati	126	G	83	699	782	0.955456	0.0501586	0.48893	128	364	492	1.70354	0.255091	0.630587	117	460	577	1.36307	0.0603773	0.577245	0.565587	0.058416
18S_rRNA_M_Locati	127	C	867	1166	2033	0.295051	0	0	697	1455	2152	0.445425	0	0	1561	712	2273	0.455775	0	0	0	0
18S_rRNA_M_Locati	128	U	681	1137	1818	0.113286	0	0	769	1307	2076	0.349264	0	0	1053	629	1682	0.152538	0	0	0	0
18S_rRNA_M_Locati	129	C	310	1046	1356	0.311611	0	0.237712	850	1272	2122	0.329916	0	0	600	1021	1621	0.0652624	0	0	0.0792374	0.112059
18S_rRNA_M_Locati	130	C	1047	1270	2317	0.258906	0	0	1530	658	2188	0.347008	0	0	2142	916	3058	0.562453	0	0	0	0
18S_rRNA_M_Locati	131	A	234	642	876	1.22654	0.244576	0.551155	947	231	1178	0.300707	0	0.231338	453	297	750	1.14529	0.146153	0.534194	0.438896	0.146929
18S_rRNA_M_Locati	132	C	690	878	1568	0.218172	0	0.179191	1215	335	1550	0.0712157	0	0	974	226	1200	0.270969	0	0.213338	0.130843	0.0935645
18S_rRNA_M_Locati	133	C	973	1217	2190	0.116127	0	0	614	337	951	0.553875	0.0671445	0.356689	732	225	957	0.639828	0.0487071	0.390429	0.249039	0.176635
18S_rRNA_M_Locati	134	C	1460	1126	2586	0.243542	0	0	1246	555	1801	0.279745	0	0	1148	519	1667	0.146789	0	0	0	0
18S_rRNA_M_Locati	135	G	1826	804	2630	0.209325	0	0	858	397	1255	0.0210191	0	0.0206025	1546	291	1837	0.244342	0	0	0.00686749	0.0097121
18S_rRNA_M_Locati	136	G	560	1012	1572	0.546323	0.0265034	0.35345	148	521	669	0.945672	0.179962	0.486412	430	389	819	0.87523	0.108044	0.467036	0.435633	0.0586477
18S_rRNA_M_Locati	137	U	898	1142	2040	0.225173	0	0.183862	248	452	700	0.806293	0.159502	0.446733	574	686	1260	0.141378	0	0.123952	0.251516	0.140189
18S_rRNA_M_Locati	138	U	1176	1459	2635	0.0280433	0	0	497	816	1313	0.0996702	0	0	632	1056	1688	0.147846	0	0	0	0
18S_rRNA_M_Locati	139	A	819	1049	1868	0.458326	0.0222494	0.314398	285	502	787	0.559278	0.0397107	0.35897	653	662	1315	0.151917	0	0.131969	0.268445	0.0982041
18S_rRNA_M_Locati	140	C	1358	1272	2630	0.0436336	0	0.0418245	621	844	1465	0.157844	0	0	679	632	1311	0.219444	0	0.180067	0.0739638	0.0769447
18S_rRNA_M_Locati	141	U	1492	2146	3638	0.272062	0	0	693	623	1316	0.0280267	0	0	855	789	1644	0.0496927	0	0	0	0
18S_rRNA_M_Locati	142	U	2050	2873	4923	0.494733	0	0	987	762	1749	0.248959	0	0	1264	1082	2346	0.379634	0	0	0	0
18S_rRNA_M_Locati	143	G	1582	1730	3312	0.189935	0	0	1133	465	1598	0.053047	0	0	899	891	1790	0.142534	0	0	0	0
18S_rRNA_M_Locati	144	G	1149	859	2008	0.430789	0	0.30119	505	264	769	1.36126	0.248237	0.576814	787	434	1221	0.304928	0	0.233821	0.370608	0.148381
18S_rRNA_M_Locati	145	A	1279	600	1879	0.482937	0	0.32578	758	258	1016	0.808729	0.0688078	0.447369	1105	374	1479	0.0228604	0	0.0223642	0.265171	0.178722
18S_rRNA_M_Locati	146	U	1613	1605	3218	0.200507	0	0	1615	656	2271	0.210104	0	0	1503	716	2219	0.370936	0	0	0	0
18S_rRNA_M_Locati	147	A	972	968	1940	0.321169	0	0.243189	942	844	1786	0.0404713	0	0.038918	949	297	1246	0.161561	0	0.139186	0.140431	0.0833981
18S_rRNA_M_Locati	148	A	1102	877	1979	0.174388	0	0.148557	1097	1139	2236	0.204083	0	0	802	196	998	0.3885	0.0262878	0.28	0.142852	0.114381
18S_rRNA_M_Locati	149	C	827	1405	2232	0.0896502	0	0	1101	2364	3465	0.547586	0	0	796	357	1153	0.122627	0	0.109316	0.0364388	0.0515322
18S_rRNA_M_Locati	150	U	1122	2632	3754	0.555792	0	0	1197	2488	3685	0.613505	0	0	997	427	1424	0.160904	0	0	0	0
18S_rRNA_M_Locati	151	G	626	843	1469	0.245404	0	0.197156	169	716	885	0.85612	0	0.461522	646	377	1023	0.184017	0	0.155546	0.271408	0.1355
18S_rRNA_M_Locati	152	U	425	1290	1715	0.0108845	0	0	295	1163	1458	0.00734141	0	0.00729286	597	580	1177	0.00274477	0	0	0.00243095	0.00343789
18S_rRNA_M_Locati	153	G	416	415	831	0.936325	0.126287	0.483858	75	528	603	1.27566	0.114968	0.560976	240	601	841	0.371272	0.0594616	0.270985	0.438606	0.122636
18S_rRNA_M_Locati	154	G	180	300	480	2.26359	0.365361	0.694031	48	210	258	4.08494	0.409826	0.803951	200	531	731	0.639739	0.146015	0.390472	0.629485	0.174864
18S_rRNA_M_Locati	155	C	362	624	986	0.466667	0	0.318402	136	358	494	1.46577	0	0.594934	364	1195	1559	0.248298	0	0	0.304445	0.243081
18S_rRNA_M_Locati	156	A	602	296	898	0.620677	0	0.383237	176	156	332	2.42069	0.137286	0.708283	418	484	902	0.455875	0.0667722	0.313366	0.468295	0.172077
18S_rRNA_M_Locati	157	A	1193	442	1635	0.204177	0	0	409	244	653	0.528474	0	0.346099	632	465	1097	0.217466	0	0.178756	0.174952	0.14132
18S_rRNA_M_Locati	158	U	1192	436	1628	0.223968	0	0	457	779	1236	0.243816	0	0	906	585	1491	0.143677	0	0	0	0
18S_rRNA_M_Locati	159	U	697	349	1046	0.24991	0	0.200095	241	423	664	0.484879	0	0.326875	435	762	1197	0.0946021	0	0.086492	0.204488	0.0981853
18S_rRNA_M_Locati	160	C	949	538	1487	0.100455	0	0	261	1470	1731	0.48266	0	0	633	1121	1754	0.276284	0	0	0	0
18S_rRNA_M_Locati	161	C	933	520	1453	0.00508177	0	0	464	1604	2068	0.556801	0	0	363	1629	1992	0.374672	0	0	0	0
18S_rRNA_M_Locati	162	A	1668	757	2425	0.425318	0	0	881	901	1782	0.456758	0	0	747	1181	1928	0.374379	0	0	0	0
18S_rRNA_M_Locati	163	G	1429	497	1926	0.242853	0	0	504	556	1060	0.00456592	0	0	284	1322	1606	0.250356	0	0	0	0
18S_rRNA_M_Locati	164	A	61	28	89	16.4998	0.821481	0.943455	11	52	63	16.167	0.816314	0.942607	8	85	93	12.5754	0.816404	0.927064	0.937709	0.00753494
18S_rRNA_M_Locati	165	G	315	527	842	0.736154	0	0.424304	99	279	378	1.66095	0.114704	0.624814	131	616	747	0.504501	0	0.335626	0.461581	0.120967
18S_rRNA_M_Locati	166	C	428	1601	2029	0.295753	0	0	106	510	616	0.804142	0	0.446121	116	980	1096	0.0364124	0	0.0351641	0.160428	0.202524
18S_rRNA_M_Locati	167	U	776	1358	2134	0.329545	0	0	218	987	1205	0.149604	0	0	206	727	933	0.176065	0	0.149843	0.0499477	0.0706367
18S_rRNA_M_Locati	168	A	687	1234	1921	0.213354	0	0	213	897	1110	0.0529853	0	0	308	806	1114	0.0436771	0	0	0	0
18S_rRNA_M_Locati	169	A	331	783	1114	0.377329	0	0.274136	202	858	1060	0.0170384	0	0	183	746	929	0.144397	0	0.126296	0.133477	0.112031
18S_rRNA_M_Locati	170	U	18	30	48	34.1472	0.901552	0.972113	7	40	47	24.0241	0.79896	0.960838	18	47	65	16.617	0.801975	0.944049	0.959	0.0115306
18S_rRNA_M_Locati	171	A	274	1073	1347	0.312957	0	0.238495	162	734	896	0.359371	0	0.264582	223	731	954	0.216195	0	0.177917	0.226998	0.0363031
18S_rRNA_M_Locati	172	C	1258	1714	2972	0.440318	0	0	2381	1120	3501	0.720655	0	0	1454	1325	2779	0.640484	0	0	0	0
18S_rRNA_M_Locati	173	A	180	1416	1596	0.136402	0	0.120096	252	828	1080	0.18192	0	0.15404	125	715	840	0.4515	0	0.311312	0.195149	0.0833005
18S_rRNA_M_Locati	174	U	389	2134	2523	0.321104	0	0	506	1313	1819	0.331569	0	0	295	1461	1756	0.346803	0	0	0	0
18S_rRNA_M_Locati	175	G	124	822	946	0.996902	0	0.499489	86	626	712	0.884416	0	0.469681	69	1069	1138	0.0643157	0	0.060479	0.343216	0.200295
18S_rRNA_M_Locati	176	C	198	2479	2677	0.361655	0	0	130	825	955	0.359368	0	0.264567	102	851	953	0.342791	0	0.255482	0.17335	0.122633
18S_rRNA_M_Locati	177	C	398	2612	3010	0.440101	0	0	428	921	1349	0.0278272	0	0	235	1084	1319	0.0436532	0	0	0	0
18S_rRNA_M_Locati	178	A	557	927	1484	0.227033	0	0.185128	479	394	873	0.56195	0	0.360038	281	826	1107	0.172012	0	0.146879	0.230682	0.0927922
18S_rRNA_M_Locati	179	A	545	633	1178	0.422401	0	0.297141	452	433	885	0.373752	0	0.27229	278	467	745	0.631591	0.0237113	0.387419	0.31895	0.0494666
18S_rRNA_M_Locati	180	C	1116	670	1786	0.153299	0	0	1445	506	1951	0.452732	0	0	787	779	1566	0.290264	0	0	0	0
18S_rRNA_M_Locati	181	G	772	579	1351	0.078049	0	0.0724481	703	594	1297	0.157952	0	0	439	577	1016	0.119808	0	0.107084	0.0598439	0.0446159
18S_rRNA_M_Locati	182	A	685	558	1243	0.155609	0	0.134749	524	427	951	0.182925	0	0.154775	534	1391	1925	0.456779	0	0	0.0965081	0.0687295
18S_rRNA_M_Locati	183	G	265	492	757	0.792304	0.0823982	0.442385	285	1192	1477	0.307954	0	0	231	452	683	0.726787	0.0674763	0.421246	0.287877	0.203743
18S_rRNA_M_Locati	184	C	148	1480	1628	0.289305	0	0	273	921	1194	0.148684	0	0	177	1311	1488	0.267734	0	0	0	0
18S_rRNA_M_Locati	185	G	16	529	545	1.42654	0.271336	0.588334	28	642	670	0.593873	0.0763162	0.372946	12	443	455	1.7309	0.30281	0.634329	0.53187	0.113934
18S_rRNA_M_Locati	186	C	285	599	884	0.468675	0.00655315	0.31936	298	258	556	0.940235	0.184242	0.485047	290	443	733	0.723161	0.108381	0.420003	0.408137	0.06816
18S_rRNA_M_Locati	187	C	467	1034	1501	0.164751	0	0	618	323	941	0.0763741	0	0.0710251	550	582	1132	0.136089	0	0.11988	0.0636352	0.0492192
18S_rRNA_M_Locati	188	G	664	671	1335	0.00981371	0	0.00972554	541	311	852	0.242647	0	0.195451	690	839	1529	0.11358	0	0	0.068392	0.0899316
18S_rRNA_M_Locati	189	A	561	305	866	0.619531	0	0.38281	339	237	576	0.885538	0.12425	0.47008	497	483	980	0.405924	0	0.288933	0.380608	0.073969
18S_rRNA_M_Locati	190	C	837	682	1519	0.0762573	0	0	636	520	1156	0.133833	0	0	1075	526	1601	0.164641	0	0	0	0
18S_rRNA_M_Locati	191	C	1517	852	2369	0.42188	0	0	715	545	1260	0.196537	0	0	1426	396	1822	0.26365	0	0	0	0
18S_rRNA_M_Locati	192	U	424	815	1239	0.241398	0	0.194583	474	802	1276	0.200539	0	0	1289	286	1575	0.120812	0	0	0.064861	0.0917273
18S_rRNA_M_Locati	193	G	757	1088	1845	0.197334	0	0	1220	393	1613	0.391333	0	0	2092	287	2379	0.468329	0	0	0	0
18S_rRNA_M_Locati	194	G	1027	1138	2165	0.354668	0	0	1513	228	1741	0.464326	0	0	2279	159	2438	0.517635	0	0	0	0
18S_rRNA_M_Locati	195	G	40	491	531	1.866	0.254059	0.651509	318	143	461	1.21809	0.177915	0.549697	81	95	176	6.42561	0.636905	0.86599	0.689065	0.131828
18S_rRNA_M_Locati	196	C	106	1505	1611	0.176971	0	0	327	338	665	0.416683	0	0.294438	168	409	577	1.00804	0	0.502434	0.265624	0.206127
18S_rRNA_M_Locati	197	C	80	2185	2265	0.501682	0	0	280	888	1168	0.317118	0	0	156	1385	1541	0.409584	0	0	0	0
18S_rRNA_M_Locati	198	G	49	819	868	0.27898	0	0.218323	71	457	528	0.469985	0	0.320133	36	476	512	0.694304	0	0.410259	0.316238	0.0784059
18S_rRNA_M_Locati	199	C	124	965	1089	0.12581	0	0	105	476	581	0.163249	0	0.140547	73	468	541	0.328126	0	0.247403	0.129317	0.101314
18S_rRNA_M_Locati	200	C	162	661	823	0.00869741	0	0	93	561	654	0.147243	0	0	128	354	482	0.138348	0	0.121756	0.0405852	0.0573962
18S_rRNA_M_Locati	201	C	83	505	588	0.127165	0	0.112988	32	366	398	0.191785	0	0.161262	82	345	427	0.0846314	0	0	0.0914167	0.0675788
18S_rRNA_M_Locati	202	U	13	150	163	2.79214	0.380122	0.737483	19	246	265	0.678321	0.0423798	0.405074	28	250	278	0.305536	0	0.234675	0.459077	0.208792
18S_rRNA_M_Locati	203	U	3	192	195	1.45816	0.0232629	0.594426	5	328	333	0.142582	0	0.125117	11	244	255	0.170009	0	0.145792	0.288445	0.216526
18S_rRNA_M_Locati	204	C	2	160	162	1.04124	0.0547781	0.51164	9	304	313	0.00958953	0	0	11	43	54	2.91273	0.496015	0.747899	0.419846	0.312151
18S_rRNA_M_Locati	205	U	1	123	124	1.21529	0	0.55058	6	302	308	0.120173	0	0	1	67	68	1.43929	0.175202	0.593572	0.381384	0.27025
18S_rRNA_M_Locati	206	C	0	106	106	0.990758	0	0.500026	4	212	216	0.113876	0	0.102659	1	32	33	2.97941	0.238345	0.754281	0.452322	0.268154
18S_rRNA_M_Locati	207	C	0	65	65	1.88081	0.0762887	0.656327	1	127	128	0.724376	0.119647	0.421977	0	15	15	6.15764	0.278048	0.867867	0.648724	0.182113
18S_rRNA_M_Locati	208	C	0	126	126	0.391251	0	0.282823	2	129	131	0.618519	0.02715	0.383948	0	28	28	2.54866	0	0.725251	0.464007	0.189284
18S_rRNA_M_Locati	209	C	0	163	163	0.146612	0	0.128549	0	81	81	1.70136	0.276137	0.632672	0	27	27	3.20635	0.0726696	0.768792	0.510004	0.275394
18S_rRNA_M_Locati	210	U	0	105	105	1.14654	0.177237	0.536492	1	168	169	0.362549	0	0.267235	0	35	35	3.04722	0.31601	0.75812	0.520616	0.200717
18S_rRNA_M_Locati	211	C	0	246	246	0.00413855	0	0.00413818	0	115	115	1.2887	0.168364	0.565199	1	64	65	1.99276	0.248809	0.669249	0.412862	0.292116
18S_rRNA_M_Locati	212	G	0	148	148	0.948248	0.160669	0.488401	3	119	122	1.42647	0.290021	0.589855	18	124	142	0.803186	0.0551709	0.44716	0.508472	0.0599587
18S_rRNA_M_Locati	213	G	2	416	418	0.275073	0	0	15	316	331	0.0141901	0	0.0140332	43	186	229	0.575894	0	0.36645	0.126828	0.169536
18S_rRNA_M_Locati	214	G	12	390	402	0.0249518	0	0	19	350	369	0.143964	0	0.126145	129	153	282	0.883981	0	0.470091	0.198745	0.198661
18S_rRNA_M_Locati	215	G	18	290	308	0.649946	0	0.394694	40	305	345	0.451188	0	0.31153	151	327	478	0.391394	0	0.281719	0.329314	0.0478054
18S_rRNA_M_Locati	216	C	12	590	602	0.108144	0	0	37	617	654	0.184003	0	0	58	516	574	0.378628	0	0.274988	0.0916627	0.129631
18S_rRNA_M_Locati	217	G	26	528	554	0.10024	0	0.091257	56	567	623	0.0230947	0	0	152	588	740	0.221742	0	0.181698	0.0909849	0.074178
18S_rRNA_M_Locati	218	G	106	239	345	1.10848	0.130537	0.526446	117	479	596	0.167058	0	0.14335	467	408	875	0.196664	0	0.164501	0.278099	0.17582
18S_rRNA_M_Locati	219	G	179	408	587	0.416459	0	0.294367	227	703	930	0.181263	0	0	1087	447	1534	0.256171	0	0	0.0981225	0.138766
18S_rRNA_M_Locati	220	G	488	829	1317	0.400169	0	0	442	814	1256	0.406612	0	0	1752	661	2413	0.541936	0	0	0	0
18S_rRNA_M_Locati	221	G	874	703	1577	0.473926	0	0	588	266	854	0.0125926	0	0	1042	650	1692	0.256048	0	0	0	0
18S_rRNA_M_Locati	222	G	332	310	642	0.517833	0	0.341516	337	314	651	0.371149	0	0.270988	655	536	1191	0.0993755	0	0.0904617	0.234322	0.105721
18S_rRNA_M_Locati	223	U	453	278	731	0.387007	0	0.279298	495	363	858	0.0887207	0	0.081578	669	423	1092	0.235895	0	0.191011	0.183962	0.0808726
18S_rRNA_M_Locati	224	G	826	547	1373	0.247752	0	0	856	228	1084	0.0953405	0	0	921	744	1665	0.209297	0	0	0	0
18S_rRNA_M_Locati	225	G	957	864	1821	0.353921	0	0	1011	482	1493	0.282485	0	0	1007	986	1993	0.303622	0	0	0	0
18S_rRNA_M_Locati	226	G	218	112	330	3.55697	0.442904	0.781074	196	22	218	5.13663	0.605478	0.837667	172	230	402	3.06512	0.432617	0.754465	0.791069	0.0346946
18S_rRNA_M_Locati	227	U	297	837	1134	0.447166	0	0.309182	337	767	1104	0.316802	0	0.24075	300	879	1179	0.376563	0	0.273722	0.274551	0.0279436
18S_rRNA_M_Locati	228	A	177	489	666	1.77463	0.262238	0.639937	190	505	695	1.44813	0.252854	0.591873	104	250	354	4.17274	0.568223	0.807118	0.679643	0.0922499
18S_rRNA_M_Locati	229	C	734	565	1299	0.491974	0	0.329917	598	1145	1743	0.0223624	0	0	476	959	1435	0.240305	0	0.193855	0.174591	0.135375
18S_rRNA_M_Locati	230	C	1426	585	2011	0.0276729	0	0	1269	447	1716	0.0398434	0	0.0383382	901	850	1751	0.0232623	0	0.0227462	0.0203615	0.0157421
18S_rRNA_M_Locati	231	C	2367	1341	3708	0.52248	0	0	1972	884	2856	0.41229	0	0	1531	1843	3374	0.525439	0	0	0	0
18S_rRNA_M_Locati	232	G	2339	592	2931	0.378596	0	0	1577	1016	2593	0.350343	0	0	1608	1230	2838	0.429071	0	0	0	0
18S_rRNA_M_Locati	233	G	4058	388	4446	0.629023	0	0	3355	741	4096	0.623429	0	0	2784	509	3293	0.499521	0	0	0	0
18S_rRNA_M_Locati	234	G	2432	56	2488	0.294786	0	0	2496	279	2775	0.426969	0	0	2473	115	2588	0.347964	0	0	0	0
18S_rRNA_M_Locati	235	G	1457	12	1469	0.200159	0	0.166871	900	11	911	0.906299	0.0799239	0.475697	823	33	856	1.27107	0.142813	0.559968	0.400845	0.168984
18S_rRNA_M_Locati	236	A	506	7	513	2.32138	0.357713	0.69933	467	57	524	2.10125	0.287103	0.677966	437	26	463	3.24176	0.440999	0.764637	0.713978	0.0368684
18S_rRNA_M_Locati	237	C	105	9	114	12.6233	0.779059	0.927188	240	81	321	3.8275	0.446487	0.793364	502	34	536	2.77966	0.375764	0.735788	0.81878	0.0801787
18S_rRNA_M_Locati	238	G	450	14	464	1.72769	0.0869495	0.63389	444	3	447	2.06662	0.157441	0.674399	734	10	744	1.60248	0.19637	0.616068	0.641452	0.0244063
18S_rRNA_M_Locati	239	C	973	41	1014	0.0033607	0	0.00335274	1285	3	1288	0.107258	0	0	2387	5	2392	0.269852	0	0	0.00111758	0.0015805
18S_rRNA_M_Locati	240	G	520	6	526	0.586549	0	0.370144	526	21	547	0.93161	0	0.482753	1427	6	1433	0.287626	0	0.223498	0.358798	0.106144
18S_rRNA_M_Locati	241	U	1136	6	1142	0.431622	0	0	1556	47	1603	0.467068	0	0	2918	44	2962	0.426775	0	0	0	0
18S_rRNA_M_Locati	242	G	819	6	825	0.245198	0	0	923	25	948	0.0217656	0	0	2163	35	2198	0.155712	0	0	0	0
18S_rRNA_M_Locati	243	C	886	12	898	0.317105	0	0	1643	20	1663	0.467047	0	0	3529	119	3648	0.518267	0	0	0	0
18S_rRNA_M_Locati	244	A	525	2	527	0.345434	0	0.257107	814	13	827	0.338983	0	0.253393	1618	18	1636	0.29569	0	0.228318	0.246273	0.0127861
18S_rRNA_M_Locati	245	U	541	13	554	0.39007	0	0.280976	849	18	867	0.497862	0	0.332638	1716	141	1857	0.207954	0	0.17223	0.261948	0.066854
18S_rRNA_M_Locati	246	U	395	14	409	1.06556	0.084794	0.516479	740	28	768	0.905245	0	0.475458	1482	256	1738	0.349294	0	0.258982	0.416973	0.112965
18S_rRNA_M_Locati	247	U	420	16	436	1.05904	0.118339	0.514909	860	44	904	0.787858	0.0373561	0.440944	1331	434	1765	0.355782	0	0.262528	0.406127	0.105935
18S_rRNA_M_Locati	248	A	256	69	325	1.9862	0.367016	0.66581	508	36	544	2.27474	0.390082	0.695022	825	334	1159	1.11213	0.168507	0.526758	0.629197	0.0734099
18S_rRNA_M_Locati	249	U	646	43	689	0.441643	0.0204838	0.306655	1198	68	1266	0.441068	0	0.306238	1122	446	1568	0.5397	0	0.350668	0.321187	0.0208468
18S_rRNA_M_Locati	250	C	1171	249	1420	0.306615	0	0	2626	113	2739	0.355057	0	0	2206	1172	3378	0.358768	0	0	0	0
18S_rRNA_M_Locati	251	A	1684	159	1843	0.465986	0	0	3693	246	3939	0.565169	0	0	2808	1203	4011	0.477841	0	0	0	0
18S_rRNA_M_Locati	252	G	1733	189	1922	0.479465	0	0	2910	389	3299	0.444512	0	0	3090	900	3990	0.490331	0	0	0	0
18S_rRNA_M_Locati	253	A	791	291	1082	0.0454191	0	0.0434842	2113	282	2395	0.189807	0	0	1481	507	1988	0.0834032	0	0.0770183	0.0401675	0.0315299
18S_rRNA_M_Locati	254	U	780	718	1498	0.264458	0	0	1817	354	2171	0.119337	0	0	1416	566	1982	0.0106124	0	0.0105062	0.00350208	0.00495268
18S_rRNA_M_Locati	255	C	470	477	947	0.267979	0	0.21152	725	504	1229	0.603767	0.0623858	0.376659	806	652	1458	0.328962	0	0.247661	0.278613	0.0708815
18S_rRNA_M_Locati	256	C	460	722	1182	0.000319339	0	0.000319507	831	897	1728	0.046051	0	0.044048	726	1004	1730	0.00797869	0	0.00792007	0.0174292	0.0190764
18S_rRNA_M_Locati	257	A	222	297	519	1.3925	0.300059	0.582495	378	584	962	0.81718	0.148973	0.449954	438	559	997	0.606134	0.0484619	0.377623	0.470024	0.0848344
18S_rRNA_M_Locati	258	A	262	353	615	0.889015	0.140129	0.471028	504	788	1292	0.150993	0	0.131273	453	558	1011	0.333191	0	0.250105	0.284135	0.140776
18S_rRNA_M_Locati	259	A	201	880	1081	0.0194496	0	0.0190958	392	916	1308	0.0283168	0	0.0275575	289	560	849	0.379451	0.0389381	0.275309	0.107321	0.118836
18S_rRNA_M_Locati	260	A	64	1042	1106	0.00629329	0	0	180	818	998	0.262874	0	0.20832	86	564	650	0.674176	0.102474	0.403061	0.203794	0.16458
18S_rRNA_M_Locati	261	C	128	1376	1504	0.301137	0	0	200	1007	1207	0.0372149	0	0	148	731	879	0.114924	0	0.103183	0.0343944	0.048641
18S_rRNA_M_Locati	262	C	75	1336	1411	0.241517	0	0	105	962	1067	0.0648564	0	0.0609599	41	769	810	0.177052	0	0.150577	0.0705124	0.0618429
18S_rRNA_M_Locati	263	C	196	1306	1502	0.271287	0	0	233	1350	1583	0.339359	0	0	121	1083	1204	0.271563	0	0	0	0
18S_rRNA_M_Locati	264	A	151	441	592	1.09893	0.194328	0.523988	192	628	820	0.401259	0.0377962	0.286605	108	715	823	0.15805	0	0.136623	0.315739	0.159477
18S_rRNA_M_Locati	265	U	201	1385	1586	0.228642	0	0	292	1042	1334	0.124628	0	0	160	1084	1244	0.178867	0	0	0	0
18S_rRNA_M_Locati	266	G	140	571	711	0.908567	0.157704	0.476397	165	364	529	1.47618	0.258425	0.596607	129	417	546	1.18237	0.167116	0.542236	0.538414	0.0491499
18S_rRNA_M_Locati	267	C	148	986	1134	0.261547	0	0.207467	223	829	1052	0.297584	0	0.229505	111	655	766	0.873924	0.0163997	0.466685	0.301219	0.117348
18S_rRNA_M_Locati	268	G	285	617	902	0.616919	0.000632056	0.381801	394	285	679	1.14083	0.185445	0.533258	125	848	973	0.565412	0	0.361428	0.425496	0.0766524
18S_rRNA_M_Locati	269	G	308	1473	1781	0.218556	0	0	546	850	1396	0.0257297	0	0.0251018	204	938	1142	0.532031	0	0.34747	0.124191	0.158215
18S_rRNA_M_Locati	270	G	180	1129	1309	0.107362	0	0.09702	268	1216	1484	0.0246315	0	0	98	1419	1517	0.249107	0	0.199533	0.0988511	0.0814694
18S_rRNA_M_Locati	271	U	228	2159	2387	0.420077	0	0	428	2424	2852	0.512038	0	0	134	2834	2968	0.327203	0	0	0	0
18S_rRNA_M_Locati	272	G	167	1310	1477	0.00230792	0	0	285	1643	1928	0.20345	0	0	154	1785	1939	0.166042	0	0.142461	0.0474871	0.0671569
18S_rRNA_M_Locati	273	C	330	2683	3013	0.55296	0	0	475	2075	2550	0.362137	0	0	366	4392	4758	0.554528	0	0	0	0
18S_rRNA_M_Locati	274	G	291	424	715	1.27075	0.190154	0.559961	283	812	1095	0.794597	0	0.442997	252	1075	1327	1.05414	0.0816906	0.513367	0.505442	0.0480781
18S_rRNA_M_Locati	275	C	480	798	1278	0.220971	0	0.181096	510	662	1172	0.79281	0.0651052	0.442427	419	3219	3638	0.285222	0	0	0.207841	0.181607
18S_rRNA_M_Locati	276	G	546	269	815	0.957584	0.15002	0.489473	500	501	1001	1.24339	0.221098	0.554493	524	1985	2509	0.157061	0	0.135788	0.393251	0.183979
18S_rRNA_M_Locati	277	G	912	415	1327	0.198979	0	0.166062	1204	788	1992	0.167397	0	0.143455	1100	2550	3650	0.217027	0	0	0.103172	0.0735352
18S_rRNA_M_Locati	278	G	602	517	1119	0.412381	0	0.29216	813	738	1551	0.625236	0.133442	0.384857	562	1199	1761	0.723925	0.0843046	0.420067	0.365695	0.0539469
18S_rRNA_M_Locati	279	C	861	1084	1945	0.216518	0	0	1531	2004	3535	0.27999	0	0	707	1815	2522	0.181354	0	0.153565	0.0511883	0.0723913
18S_rRNA_M_Locati	280	G	787	1038	1825	0.191165	0	0	1487	2587	4074	0.365292	0	0	1764	1974	3738	0.281053	0	0	0	0
18S_rRNA_M_Locati	281	G	723	736	1459	0.0715145	0	0.0667842	1353	1541	2894	0.0337862	0	0	1152	1789	2941	0.0536521	0	0	0.0222614	0.0314824
18S_rRNA_M_Locati	282	U	459	1285	1744	0.125508	0	0	1012	1823	2835	0.00533224	0	0.00530582	1416	2504	3920	0.362697	0	0	0.00176861	0.00250119
18S_rRNA_M_Locati	283	G	1272	1124	2396	0.397942	0	0	2482	1343	3825	0.282863	0	0	1216	1712	2928	0.163332	0	0	0	0
18S_rRNA_M_Locati	284	G	878	492	1370	0.087341	0	0.0803792	1211	2399	3610	0.269885	0	0	796	1239	2035	0.125824	0	0.111811	0.0640632	0.0470819
18S_rRNA_M_Locati	285	A	689	1081	1770	0.236978	0	0	1325	3110	4435	0.468751	0	0	783	1716	2499	0.182782	0	0	0	0
18S_rRNA_M_Locati	286	G	406	811	1217	0.0380952	0	0.0367263	637	1562	2199	0.0366515	0	0.0353712	442	1197	1639	0.148943	0	0.129704	0.0672671	0.0441528
18S_rRNA_M_Locati	287	A	105	1050	1155	0.0396867	0	0	144	854	998	1.04464	0.149615	0.511168	119	1554	1673	0.0751493	0	0	0.170389	0.240967
18S_rRNA_M_Locati	288	G	145	836	981	0.000362073	0	0.000362311	187	1255	1442	0.167691	0	0.143694	194	948	1142	0.160212	0	0.138193	0.0940831	0.0663086
18S_rRNA_M_Locati	289	G	186	678	864	0.0339371	0	0	83	1238	1321	0.0626576	0	0.0590051	158	623	781	0.341091	0	0.254581	0.104529	0.108803
18S_rRNA_M_Locati	290	G	53	500	553	0.231348	0	0.188158	51	478	529	1.2147	0.0827542	0.548938	48	394	442	0.899273	0.134898	0.474046	0.403714	0.155458
18S_rRNA_M_Locati	291	G	48	281	329	0.774074	0.103322	0.437072	53	246	299	2.08693	0.0927358	0.676784	44	235	279	1.42151	0.171936	0.587901	0.567252	0.0989451
18S_rRNA_M_Locati	292	G	21	236	257	0.765116	0.085907	0.434419	15	210	225	1.85044	0.197365	0.650187	33	160	193	1.57784	0.169629	0.613304	0.56597	0.0942313
18S_rRNA_M_Locati	293	G	22	53	75	4.17281	0.493645	0.808739	9	135	144	2.72498	0.288224	0.732899	14	40	54	6.17657	0.537957	0.862844	0.801494	0.0532964
18S_rRNA_M_Locati	294	C	22	73	95	2.23819	0.186691	0.693417	14	208	222	1.08246	0	0.520921	20	116	136	0.991322	0	0.499653	0.57133	0.0867638
18S_rRNA_M_Locati	295	C	57	132	189	0.264152	0	0.20983	29	251	280	0.369197	0	0.270348	36	103	139	0.453175	0	0.313392	0.264523	0.0424793
18S_rRNA_M_Locati	296	U	41	80	121	0.679144	0	0.406442	32	353	385	0.174208	0	0	45	110	155	0.047151	0	0.0453052	0.150583	0.181863
18S_rRNA_M_Locati	297	C	94	137	231	0.25249	0	0	108	411	519	0.405684	0	0	57	123	180	0.201719	0	0	0	0
18S_rRNA_M_Locati	298	G	18	79	97	0.815533	0	0.451736	28	173	201	0.70209	0	0.41369	33	94	127	0.101128	0	0.092497	0.319308	0.16113
18S_rRNA_M_Locati	299	C	49	313	362	0.605204	0	0	95	665	760	0.629844	0	0	69	111	180	0.271209	0	0	0	0
18S_rRNA_M_Locati	300	G	10	101	111	0.778968	0	0.440085	10	115	125	2.01235	0.192754	0.669797	11	43	54	1.84343	0.384081	0.652485	0.587456	0.104446
18S_rRNA_M_Locati	301	C	31	97	128	1.06701	0	0.518153	23	207	230	0.757816	0	0.432177	14	96	110	0.528028	0	0.347611	0.432647	0.0696242
18S_rRNA_M_Locati	302	C	47	121	168	0.715516	0	0.418529	25	235	260	0.637888	0	0.390371	39	143	182	0.0413479	0	0	0.269633	0.191006
18S_rRNA_M_Locati	303	U	40	183	223	0.462103	0	0.317022	54	487	541	0.211931	0	0	46	136	182	0.108622	0	0.0984644	0.138495	0.132483
18S_rRNA_M_Locati	304	A	14	77	91	3.52041	0.357005	0.780658	37	120	157	2.22736	0.311893	0.691505	32	71	103	1.70363	0.0349622	0.632376	0.701513	0.0609481
18S_rRNA_M_Locati	305	C	25	137	162	1.8623	0.225958	0.652029	76	196	272	1.07949	0.179343	0.520028	44	99	143	1.42207	0.103007	0.588818	0.586958	0.053905
18S_rRNA_M_Locati	306	C	50	522	572	0.123192	0	0	97	568	665	0.0438105	0	0	82	164	246	1.08129	0	0.520541	0.173514	0.245385
18S_rRNA_M_Locati	307	C	89	1210	1299	0.616863	0	0	157	802	959	0.187743	0	0	194	277	471	0.465395	0	0.31805	0.106017	0.14993
18S_rRNA_M_Locati	308	G	44	359	403	0.625193	0	0.385275	119	486	605	0.584122	0	0.36912	113	185	298	1.84337	0.150107	0.649068	0.467821	0.12833
18S_rRNA_M_Locati	309	C	70	518	588	0.169817	0	0.145376	267	509	776	0.41899	0	0.295542	207	320	527	0.903893	0.0591423	0.475233	0.305384	0.134843
18S_rRNA_M_Locati	310	C	107	1019	1126	0.405176	0	0	401	500	901	0.396588	0	0.284195	317	908	1225	0.0843031	0	0	0.0947316	0.133971
18S_rRNA_M_Locati	311	G	128	424	552	0.436669	0	0.304328	486	587	1073	0.344817	0.0497538	0.256582	502	510	1012	0.331787	0	0.249314	0.270075	0.024402
18S_rRNA_M_Locati	312	C	519	659	1178	0.372679	0	0	1459	731	2190	0.34202	0	0	1787	994	2781	0.544592	0	0	0	0
18S_rRNA_M_Locati	313	C	300	572	872	0.117004	0	0	1391	1078	2469	0.396023	0	0	1603	1073	2676	0.495239	0	0	0	0
18S_rRNA_M_Locati	314	G	98	471	569	0.335146	0	0.251349	262	1401	1663	0.027297	0	0	303	841	1144	0.343872	0	0.256048	0.169132	0.11961
18S_rRNA_M_Locati	315	U	88	644	732	0.0347431	0	0.0336208	299	1729	2028	0.215722	0	0	390	1503	1893	0.24462	0	0	0.0112069	0.015849
18S_rRNA_M_Locati	316	C	161	527	688	0.198033	0	0.165499	440	1827	2267	0.308853	0	0	693	1349	2042	0.321548	0	0	0.0551662	0.0780168
18S_rRNA_M_Locati	317	C	116	858	974	0.100889	0	0	412	1944	2356	0.350365	0	0	805	1178	1983	0.328114	0	0	0	0
18S_rRNA_M_Locati	318	G	62	395	457	1.15631	0.127071	0.536788	191	891	1082	0.473212	0.111136	0.321413	233	575	808	0.70515	0.0962964	0.413841	0.424014	0.0882203
18S_rRNA_M_Locati	319	C	119	513	632	0.531051	0	0.347212	216	894	1110	0.288079	0	0.223806	89	597	686	0.750898	0.0504013	0.429221	0.333413	0.084426
18S_rRNA_M_Locati	320	C	224	365	589	0.721375	0	0.419482	240	729	969	0.332772	0	0.249877	125	343	468	1.29595	0.1637	0.564975	0.411445	0.128763
18S_rRNA_M_Locati	321	C	609	269	878	0.257388	0	0.204886	299	470	769	0.631991	0.033855	0.38756	47	251	298	2.53508	0.365455	0.7178	0.436749	0.212265
18S_rRNA_M_Locati	322	C	1505	354	1859	0.380018	0	0	1052	176	1228	0.0266703	0	0	669	272	941	0.0201581	0	0.0197803	0.00659344	0.00932453
18S_rRNA_M_Locati	323	C	2107	410	2517	0.451293	0	0	1194	84	1278	0.0221788	0	0.0217142	1073	340	1413	0.324116	0	0	0.00723806	0.0102362
18S_rRNA_M_Locati	324	G	906	122	1028	0.641259	0	0.390943	687	48	735	0.923415	0.0268083	0.480431	577	267	844	0.229967	0	0.18715	0.352841	0.122725
18S_rRNA_M_Locati	325	G	476	113	589	2.28409	0.221984	0.69586	354	93	447	2.58837	0.38452	0.721771	299	214	513	1.31654	0.160575	0.568799	0.662143	0.0668468
18S_rRNA_M_Locati	326	C	820	112	932	1.18615	0.0478602	0.542841	576	110	686	1.62093	0.293089	0.618799	599	144	743	0.717145	0.0578596	0.417965	0.526535	0.0827971
18S_rRNA_M_Locati	327	C	2030	42	2072	0.049456	0	0	1442	64	1506	0.184259	0	0.155677	994	45	1039	0.239274	0	0.193226	0.116301	0.0836536
18S_rRNA_M_Locati	328	U	2760	37	2797	0.321865	0	0	2394	91	2485	0.303303	0	0	1697	41	1738	0.287835	0	0	0	0
18S_rRNA_M_Locati	329	C	5282	57	5339	0.713373	0	0	4378	75	4453	0.658497	0	0	2714	50	2764	0.595081	0	0	0	0
18S_rRNA_M_Locati	330	G	2028	35	2063	0.148175	0	0	2280	55	2335	0.246799	0	0	1607	24	1631	0.236315	0	0	0	0
18S_rRNA_M_Locati	331	C	2676	35	2711	0.429408	0	0	2700	39	2739	0.388228	0	0	2009	40	2049	0.42722	0	0	0	0
18S_rRNA_M_Locati	332	U	1473	60	1533	0.000999565	0	0.000999218	3300	54	3354	0.548746	0	0	1599	59	1658	0.288675	0	0	0.000333073	0.000471036
18S_rRNA_M_Locati	333	U	106	3	109	12.7451	0.772243	0.92786	139	2	141	11.3014	0.769064	0.919235	95	2	97	12.3259	0.791156	0.925667	0.924254	0.00366031
18S_rRNA_M_Locati	334	U	31	16	47	25.9241	0.849403	0.963604	46	3	49	30.99	0.895931	0.969346	37	3	40	30.2726	0.902772	0.968779	0.967243	0.00258351
18S_rRNA_M_Locati	335	G	364	111	475	1.107	0	0.525917	461	113	574	1.37277	0.00821128	0.578977	552	117	669	0.756949	0	0.431198	0.51203	0.0611243
18S_rRNA_M_Locati	336	G	499	71	570	0.167075	0	0.143372	1056	78	1134	0.0607538	0	0	1425	76	1501	0.329982	0	0	0.0477908	0.0675864
18S_rRNA_M_Locati	337	U	237	93	330	0.745552	0	0.427856	653	257	910	0.0745091	0	0.0694134	732	216	948	0.101452	0	0.0921956	0.196488	0.163866
18S_rRNA_M_Locati	338	G	317	36	353	0.348462	0	0.258957	381	106	487	0.958288	0	0.489862	417	352	769	0.400577	0	0.286274	0.345031	0.103017
18S_rRNA_M_Locati	339	A	214	87	301	0.457837	0	0.314767	288	236	524	0.561016	0	0.359831	509	436	945	0.104123	0	0.0943939	0.25633	0.115975
18S_rRNA_M_Locati	340	C	264	214	478	0.0431454	0	0	357	661	1018	0.204471	0	0	672	827	1499	0.307474	0	0	0	0
18S_rRNA_M_Locati	341	U	229	159	388	0.450129	0	0.310957	453	639	1092	0.192915	0	0	977	636	1613	0.317162	0	0	0.103652	0.146587
18S_rRNA_M_Locati	342	C	257	137	394	0.528692	0	0.34642	317	804	1121	0.21325	0	0	650	644	1294	0.122051	0	0	0.115473	0.163304
18S_rRNA_M_Locati	343	U	526	54	580	0.0574871	0	0.0544506	580	261	841	0.0452626	0	0.0433519	832	72	904	0.246765	0	0.1981	0.0986341	0.0704786
18S_rRNA_M_Locati	344	A	914	154	1068	0.422711	0	0	1056	550	1606	0.51584	0	0	1260	570	1830	0.448565	0	0	0	0
18S_rRNA_M_Locati	345	G	377	109	486	0.647159	0	0.393385	200	204	404	1.35654	0.182603	0.576253	280	342	622	0.928661	0.119353	0.481907	0.483848	0.0746685
18S_rRNA_M_Locati	346	A	432	128	560	0.691979	0	0.409407	362	225	587	0.713927	0.00201683	0.416958	373	262	635	1.05956	0.0915101	0.514852	0.447072	0.0480262
18S_rRNA_M_Locati	347	U	1049	510	1559	0.39958	0	0	855	443	1298	0.236703	0	0	820	497	1317	0.00397909	0	0	0	0
18S_rRNA_M_Locati	348	A	421	337	758	0.518811	0	0.341887	287	223	510	1.33407	0.150229	0.572044	449	280	729	1.07493	0.12113	0.518399	0.477443	0.0983228
18S_rRNA_M_Locati	349	A	445	171	616	1.07167	0.150701	0.517703	249	203	452	1.96466	0.313326	0.663186	495	199	694	1.33797	0.218457	0.572631	0.584507	0.059984
18S_rRNA_M_Locati	350	C	524	418	942	0.390326	0	0.280959	375	426	801	0.75762	0.0809958	0.431355	756	333	1089	0.517564	0	0.341255	0.35119	0.0617995
18S_rRNA_M_Locati	351	C	1548	513	2061	0.348491	0	0	817	630	1447	0.0468386	0	0.0447724	1491	674	2165	0.234729	0	0	0.0149241	0.0211059
18S_rRNA_M_Locati	352	U	2061	429	2490	0.37594	0	0	1481	604	2085	0.153382	0	0	2373	777	3150	0.43023	0	0	0	0
18S_rRNA_M_Locati	353	C	682	778	1460	0.272994	0	0.214566	1320	781	2101	0.0482451	0	0	1696	906	2602	0.226171	0	0	0.0715219	0.101147
18S_rRNA_M_Locati	354	G	1145	635	1780	0.0679643	0	0.0636726	2300	372	2672	0.214994	0	0	2135	1054	3189	0.381247	0	0	0.0212242	0.0300156
18S_rRNA_M_Locati	355	G	469	1003	1472	0.400784	0	0.286253	2023	813	2836	0.188834	0	0	882	948	1830	0.189302	0	0.159243	0.148499	0.117109
18S_rRNA_M_Locati	356	G	201	656	857	1.70004	0.304432	0.629907	999	392	1391	0.946943	0.162368	0.486554	162	498	660	2.63274	0.395313	0.725028	0.61383	0.0980182
18S_rRNA_M_Locati	357	C	1664	1408	3072	0.307329	0	0	2560	683	3243	0.195767	0	0	1812	745	2557	0.141908	0	0	0	0
18S_rRNA_M_Locati	358	C	1239	3064	4303	0.528679	0	0	2409	2056	4465	0.417264	0	0	1613	2184	3797	0.471555	0	0	0	0
18S_rRNA_M_Locati	359	G	1027	1859	2886	0.268476	0	0	1313	1508	2821	0.029018	0	0	1403	869	2272	0.101075	0	0	0	0
18S_rRNA_M_Locati	360	A	136	1678	1814	0.224432	0	0.183377	413	1894	2307	0.193356	0	0.162086	222	883	1105	0.88693	0.098446	0.470264	0.271909	0.140527
18S_rRNA_M_Locati	361	U	251	1722	1973	0.0636666	0	0.0598843	513	2510	3023	0.162864	0	0	492	1049	1541	0.223245	0	0.182599	0.0808279	0.0760027
18S_rRNA_M_Locati	362	C	661	2221	2882	0.346533	0	0	858	2713	3571	0.355403	0	0	1181	1383	2564	0.343214	0	0	0	0
18S_rRNA_M_Locati	363	G	331	737	1068	0.858715	0.0831455	0.462227	535	1139	1674	0.440697	0	0.306018	837	665	1502	0.178133	0	0.151285	0.30651	0.126942
18S_rRNA_M_Locati	364	C	471	1739	2210	0.267124	0	0	463	2850	3313	0.407252	0	0	875	876	1751	0.0778602	0	0	0	0
18S_rRNA_M_Locati	365	G	55	840	895	0.67128	0.0364463	0.401925	152	793	945	1.02415	0.171445	0.506229	176	1051	1227	0.195919	0	0.163935	0.357363	0.14325
18S_rRNA_M_Locati	366	C	313	1482	1795	0.325266	0	0	379	1365	1744	0.0847947	0	0	492	1252	1744	0.262139	0	0	0	0
18S_rRNA_M_Locati	367	G	177	461	638	0.897687	0.149772	0.473433	139	657	796	0.904308	0.0927626	0.475188	202	712	914	0.439417	0.0441469	0.305506	0.418042	0.0795783
18S_rRNA_M_Locati	368	C	254	418	672	0.686743	0	0.4075	188	773	961	0.458281	0	0.314485	255	643	898	0.444902	0	0.308149	0.343378	0.045415
18S_rRNA_M_Locati	369	C	244	407	651	0.536708	0	0.349607	183	1026	1209	0.0704959	0	0.0659043	318	715	1033	0.151633	0	0.131779	0.18243	0.121232
18S_rRNA_M_Locati	370	C	290	309	599	0.60037	0	0.375536	154	395	549	1.43265	0	0.589366	195	1160	1355	0.186816	0	0	0.321634	0.243608
18S_rRNA_M_Locati	371	U	218	496	714	0.238508	0	0.192795	158	307	465	1.75982	0.209986	0.638154	183	528	711	0.615153	0.054685	0.381195	0.404048	0.182534
18S_rRNA_M_Locati	372	C	272	607	879	0.0650758	0	0.0611649	557	123	680	1.00819	0.088913	0.502407	320	438	758	0.524652	0.0235055	0.34441	0.302661	0.182539
18S_rRNA_M_Locati	373	G	379	238	617	0.50827	0	0.337351	671	45	716	0.906772	0.0346284	0.475902	334	408	742	0.523718	0.0396178	0.344014	0.385756	0.0638009
18S_rRNA_M_Locati	374	C	1116	609	1725	0.524804	0	0	2549	262	2811	0.589248	0	0	1555	466	2021	0.511227	0	0	0	0
18S_rRNA_M_Locati	375	G	628	228	856	0.0840529	0	0.0776193	2222	559	2781	0.584384	0	0	946	251	1197	0.099425	0	0	0.0258731	0.0365901
18S_rRNA_M_Locati	376	G	436	61	497	1.00241	0	0.501104	970	213	1183	0.0983483	0	0.0896109	470	311	781	0.411864	0	0.291981	0.294232	0.167999
18S_rRNA_M_Locati	377	C	740	371	1111	0.0506095	0	0	1343	365	1708	0.263507	0	0	527	851	1378	0.256861	0	0	0	0
18S_rRNA_M_Locati	378	G	1798	268	2066	0.489706	0	0	846	1208	2054	0.422774	0	0	524	892	1416	0.275825	0	0	0	0
18S_rRNA_M_Locati	379	G	415	167	582	1.17709	0	0.541098	166	331	497	1.56801	0.156664	0.611071	170	714	884	0.207332	0	0.171888	0.441352	0.192669
18S_rRNA_M_Locati	380	C	359	161	520	1.54769	0.122194	0.607945	128	168	296	3.06281	0.370799	0.75449	99	604	703	0.527967	0.0647792	0.345857	0.569431	0.169032
18S_rRNA_M_Locati	381	G	398	232	630	1.11557	0.0465888	0.527709	74	425	499	1.05829	0	0.51466	89	679	768	0.304783	0.0069984	0.233822	0.425397	0.135569
18S_rRNA_M_Locati	382	A	517	568	1085	0.312625	0	0.238335	60	582	642	0.494298	0	0.331134	165	577	742	0.489382	0	0.328878	0.299449	0.0432238
18S_rRNA_M_Locati	383	C	980	1882	2862	0.531544	0	0	128	1412	1540	0.444437	0	0	150	1155	1305	0.157138	0	0	0	0
18S_rRNA_M_Locati	384	G	900	1486	2386	0.380599	0	0	125	667	792	0.260474	0	0.206854	173	858	1031	0.137102	0	0.120674	0.109176	0.0848384
18S_rRNA_M_Locati	385	G	632	604	1236	0.316087	0	0.24032	80	240	320	2.46054	0.260981	0.711668	226	544	770	0.602666	0.00614867	0.376344	0.442777	0.198078
18S_rRNA_M_Locati	386	U	683	467	1150	0.433353	0	0.302518	135	228	363	2.27537	0.271934	0.695274	290	655	945	0.344421	0	0.256387	0.41806	0.196923
18S_rRNA_M_Locati	387	U	660	700	1360	0.212001	0	0.175024	479	456	935	0.316453	0	0.240578	279	743	1022	0.282187	0	0.220251	0.211951	0.0273982
18S_rRNA_M_Locati	388	C	1061	1492	2553	0.40928	0	0	406	1789	2195	0.420087	0	0	432	2589	3021	0.615578	0	0	0	0
18S_rRNA_M_Locati	389	A	843	935	1778	0.135513	0	0	279	905	1184	0.281978	0	0.220101	357	1117	1474	0.0664256	0	0	0.0733669	0.103756
18S_rRNA_M_Locati	390	U	968	1024	1992	0.324285	0	0	479	2113	2592	0.466761	0	0	496	1099	1595	0.167934	0	0	0	0
18S_rRNA_M_Locati	391	U	1133	693	1826	0.314468	0	0	776	1578	2354	0.364067	0	0	536	746	1282	0.082463	0	0.0762358	0.0254119	0.0359379
18S_rRNA_M_Locati	392	C	25	372	397	2.48202	0.423751	0.713325	13	937	950	0.908903	0.0112738	0.476401	17	1099	1116	0.334995	0	0.251102	0.480276	0.188722
18S_rRNA_M_Locati	393	G	250	616	866	0.523529	0	0.34389	176	887	1063	0.846596	0.0845504	0.458696	208	592	800	1.03336	0.119831	0.508516	0.437034	0.0689317
18S_rRNA_M_Locati	394	A	196	657	853	0.463921	0	0.317157	248	2617	2865	0.376243	0	0	270	1502	1772	0.140227	0	0	0.105719	0.149509
18S_rRNA_M_Locati	395	A	184	489	673	0.7364	0.00434929	0.424458	355	1512	1867	0.00471092	0	0	308	917	1225	0.231947	0	0.188401	0.204287	0.173648
18S_rRNA_M_Locati	396	U	162	500	662	0.703536	0	0.413352	322	679	1001	0.932346	0.0297325	0.482744	372	411	783	1.00668	0.119119	0.501982	0.466026	0.0380654
18S_rRNA_M_Locati	397	G	388	895	1283	0.172378	0	0	981	854	1835	0.0349008	0	0	629	1178	1807	0.164774	0	0	0	0
18S_rRNA_M_Locati	398	U	671	1007	1678	0.403957	0	0	1713	1246	2959	0.476704	0	0	1171	1444	2615	0.450442	0	0	0	0
18S_rRNA_M_Locati	399	C	994	797	1791	0.425601	0	0	1700	1325	3025	0.504623	0	0	1525	1302	2827	0.496531	0	0	0	0
18S_rRNA_M_Locati	400	U	175	378	553	1.09783	0.121181	0.523769	770	299	1069	0.519688	0.00330901	0.342181	464	470	934	0.713595	0.00711543	0.416692	0.427547	0.0745292
18S_rRNA_M_Locati	401	G	413	521	934	0.1853	0	0.156473	813	324	1137	0.253466	0	0.202354	501	634	1135	0.316657	0	0.240662	0.19983	0.0344162
18S_rRNA_M_Locati	402	C	440	519	959	0.163438	0	0.140604	505	293	798	0.720331	0	0.419021	252	919	1171	0.24125	0	0.194494	0.251373	0.120569
18S_rRNA_M_Locati	403	C	1328	444	1772	0.433277	0	0	954	371	1325	0.0565108	0	0	1352	657	2009	0.351714	0	0	0	0
18S_rRNA_M_Locati	404	C	607	383	990	0.0532347	0	0.0505924	284	383	667	0.8584	0.0536567	0.462275	550	568	1118	0.158693	0	0.137065	0.216644	0.177239
18S_rRNA_M_Locati	405	U	584	379	963	0.0399493	0	0.038453	260	650	910	0.257129	0	0.204715	462	833	1295	0.115235	0	0	0.0810561	0.0888383
18S_rRNA_M_Locati	406	A	430	258	688	0.511159	0	0.338582	192	384	576	0.999846	0.175682	0.500395	217	303	520	1.21058	0.213215	0.548106	0.462361	0.0896661
18S_rRNA_M_Locati	407	U	455	332	787	0.493711	0	0.330808	291	399	690	0.797877	0.141156	0.444146	370	516	886	0.288814	0	0.224289	0.333081	0.0897707
18S_rRNA_M_Locati	408	C	438	594	1032	0.241981	0	0.194987	375	1024	1399	0.0779048	0	0	540	647	1187	0.0345024	0	0	0.0649956	0.0919177
18S_rRNA_M_Locati	409	A	344	282	626	1.3737	0.225825	0.579106	250	739	989	0.530022	0.0803027	0.346644	426	165	591	1.08476	0.186877	0.52075	0.482167	0.0987462
18S_rRNA_M_Locati	410	A	568	216	784	0.897481	0.0924058	0.473303	486	744	1230	0.260502	0	0.206798	682	67	749	0.5492	0.00841426	0.354811	0.344971	0.109022
18S_rRNA_M_Locati	411	C	958	342	1300	0.1794	0	0.152211	724	1484	2208	0.312504	0	0	895	204	1099	0.00523232	0	0.0052098	0.0524735	0.0705569
18S_rRNA_M_Locati	412	U	1324	749	2073	0.266276	0	0	1080	1129	2209	0.293881	0	0	1298	441	1739	0.421788	0	0	0	0
18S_rRNA_M_Locati	413	U	1820	1337	3157	0.516716	0	0	1388	861	2249	0.294706	0	0	1382	403	1785	0.408137	0	0	0	0
18S_rRNA_M_Locati	414	U	1717	1100	2817	0.428342	0	0	2150	358	2508	0.391661	0	0	1557	279	1836	0.442926	0	0	0	0
18S_rRNA_M_Locati	415	C	1038	1819	2857	0.437443	0	0	1757	1002	2759	0.483402	0	0	1093	179	1272	0.156655	0	0	0	0
18S_rRNA_M_Locati	416	G	168	393	561	2.34784	0.354733	0.701673	653	281	934	0.699026	0.109694	0.411686	269	210	479	1.46405	0.204861	0.594667	0.569342	0.119733
18S_rRNA_M_Locati	417	A	135	1221	1356	0.316966	0	0.240813	359	451	810	0.942567	0.145742	0.485526	144	137	281	3.54681	0.470092	0.780674	0.502338	0.220718
18S_rRNA_M_Locati	418	U	270	645	915	0.976892	0.159049	0.494429	352	438	790	0.931549	0.0939097	0.482597	303	134	437	1.94762	0.287392	0.661255	0.546093	0.0815746
18S_rRNA_M_Locati	419	G	1751	390	2141	0.243179	0	0	676	198	874	0.684203	0.00558448	0.406523	1394	177	1571	0.251018	0	0	0.135508	0.191637
18S_rRNA_M_Locati	420	G	1017	212	1229	0.318437	0	0.241675	343	148	491	1.98771	0.303026	0.665749	549	97	646	1.00819	0.104231	0.502426	0.46995	0.174644
18S_rRNA_M_Locati	421	U	984	419	1403	0.0760763	0	0.0707447	805	284	1089	0.287706	0	0.223585	1221	252	1473	0.180401	0	0	0.0981098	0.0933066
18S_rRNA_M_Locati	422	A	1216	362	1578	0.105594	0	0	1396	143	1539	0.134098	0	0	1492	38	1530	0.1837	0	0	0	0
18S_rRNA_M_Locati	423	G	1336	327	1663	0.13521	0	0	2013	162	2175	0.38171	0	0	1725	833	2558	0.526156	0	0	0	0
18S_rRNA_M_Locati	424	G	1076	459	1535	0.0628255	0	0	1748	462	2210	0.355279	0	0	924	513	1437	0.0054242	0	0.00539867	0.00179956	0.00254496
18S_rRNA_M_Locati	425	U	736	1042	1778	0.221891	0	0	1510	243	1753	0.135139	0	0	628	935	1563	0.073366	0	0	0	0
18S_rRNA_M_Locati	426	C	1028	425	1453	0.068707	0	0	1019	204	1223	0.339207	0	0.253444	717	561	1278	0.140448	0	0.123236	0.12556	0.103481
18S_rRNA_M_Locati	427	C	422	712	1134	0.223475	0.0296313	0.182788	1270	693	1963	0.161722	0	0	580	403	983	0.558435	0.0812589	0.358564	0.180451	0.146393
18S_rRNA_M_Locati	428	G	883	278	1161	0.202161	0	0.168285	715	597	1312	0.39934	0.0325669	0.285533	834	421	1255	0.228432	0	0.186075	0.213298	0.0515917
18S_rRNA_M_Locati	429	U	1032	177	1209	0.110551	0	0.0996202	922	617	1539	0.195924	0	0.163915	971	473	1444	0.0325567	0	0.0315513	0.0983622	0.0540446
18S_rRNA_M_Locati	430	C	469	746	1215	0.0951846	0	0.0869772	602	1118	1720	0.0370521	0	0.0357483	688	1376	2064	0.341889	0	0	0.0409085	0.0356953
18S_rRNA_M_Locati	431	G	288	487	775	0.765407	0.166573	0.433875	387	818	1205	0.550276	0.072921	0.355144	405	497	902	0.620709	0.0408847	0.383248	0.390756	0.0325774
18S_rRNA_M_Locati	432	C	433	898	1331	0.0475893	0	0	618	1349	1967	0.0864442	0	0	651	718	1369	0.0129116	0	0	0	0
18S_rRNA_M_Locati	433	C	539	1127	1666	0.262068	0	0	952	1353	2305	0.201566	0	0	941	768	1709	0.25117	0	0	0	0
18S_rRNA_M_Locati	434	U	589	1379	1968	0.400813	0	0	1322	1935	3257	0.475148	0	0	979	1383	2362	0.505539	0	0	0	0
18S_rRNA_M_Locati	435	A	384	455	839	0.519537	0.0262098	0.342173	1175	671	1846	0.00457198	0	0	409	466	875	0.461136	0.0137897	0.315848	0.21934	0.155469
18S_rRNA_M_Locati	436	C	599	956	1555	0.263496	0	0	949	139	1088	0.705612	0.0363575	0.413923	487	776	1263	0.0843618	0	0	0.137974	0.195125
18S_rRNA_M_Locati	437	C	795	423	1218	0.0782609	0	0	2008	165	2173	0.25323	0	0	674	109	783	0.405782	0	0.288914	0.0963048	0.136196
18S_rRNA_M_Locati	438	A	699	152	851	0.312872	0	0.238524	1369	34	1403	0.159338	0	0.137524	451	51	502	1.14327	0.21182	0.533919	0.303322	0.168189
18S_rRNA_M_Locati	439	U	842	401	1243	0.201858	0	0	1947	326	2273	0.352555	0	0	660	178	838	0.179393	0	0.15226	0.0507535	0.0717762
18S_rRNA_M_Locati	440	G	498	331	829	0.197055	0	0.164782	1203	94	1297	0.217737	0	0.178918	387	439	826	0.184092	0	0.15563	0.166443	0.0095793
18S_rRNA_M_Locati	441	G	319	423	742	0.232481	0	0.188835	703	202	905	0.643598	0	0.391842	336	608	944	0.0688889	0	0	0.193559	0.160004
18S_rRNA_M_Locati	442	U	161	547	708	0.309293	0	0.236484	566	277	843	0.785821	0	0.440326	189	727	916	0.00112686	0	0	0.225603	0.179927
18S_rRNA_M_Locati	443	G	197	382	579	0.628697	0.0781715	0.386421	305	146	451	2.54929	0.368875	0.718701	94	654	748	0.328675	0	0.247619	0.450914	0.197651
18S_rRNA_M_Locati	444	A	126	476	602	0.675456	0.0805614	0.403547	332	348	680	1.42132	0.223942	0.587359	69	499	568	0.963816	0.173815	0.491227	0.494044	0.0750674
18S_rRNA_M_Locati	445	C	154	456	610	0.740444	0.118017	0.425834	412	1796	2208	0.310895	0	0	129	916	1045	0.0747397	0	0.0696041	0.165146	0.186512
18S_rRNA_M_Locati	446	C	525	963	1488	0.338848	0	0	1358	1881	3239	0.576824	0	0	451	1362	1813	0.415141	0	0	0	0
18S_rRNA_M_Locati	447	A	173	564	737	0.528636	0	0.346129	460	638	1098	0.472126	0	0.320909	184	460	644	0.905289	0.0328429	0.475532	0.380857	0.0677328
18S_rRNA_M_Locati	448	C	131	1202	1333	0.165459	0	0	429	1731	2160	0.304412	0	0	81	1266	1347	0.144939	0	0	0	0
18S_rRNA_M_Locati	449	G	193	1421	1614	0.22849	0	0	574	1210	1784	0.0423716	0	0	159	1889	2048	0.45908	0	0	0	0
18S_rRNA_M_Locati	450	G	174	1990	2164	0.416808	0	0	694	1987	2681	0.380479	0	0	180	1869	2049	0.437653	0	0	0	0
18S_rRNA_M_Locati	451	G	153	1023	1176	0.200321	0	0.167008	208	932	1140	0.592239	0	0.372158	94	758	852	0.50323	0	0.335027	0.291398	0.0892537
18S_rRNA_M_Locati	452	U	51	814	865	0.707236	0	0.414538	148	529	677	1.60161	0.0868999	0.615971	54	594	648	0.993802	0.13037	0.498831	0.50978	0.0825983
18S_rRNA_M_Locati	453	G	102	1029	1131	0.263565	0	0.208734	155	631	786	1.04723	0	0.511852	70	897	967	0.257059	0	0.204661	0.308416	0.143861
18S_rRNA_M_Locati	454	A	74	1000	1074	0.364114	0	0.267105	151	884	1035	0.520892	0	0.342709	87	595	682	0.877794	0.137057	0.467825	0.359213	0.0827703
18S_rRNA_M_Locati	455	C	70	3110	3180	0.618813	0	0	179	3895	4074	0.718369	0	0	89	1356	1445	0.175488	0	0	0	0
18S_rRNA_M_Locati	456	G	117	1330	1447	0.0214549	0	0	239	1480	1719	0.19042	0	0	121	1594	1715	0.305206	0	0	0	0
18S_rRNA_M_Locati	457	G	75	871	946	0.616755	0	0.381726	157	674	831	0.957025	0	0.489321	46	746	792	0.834034	0	0.455067	0.442038	0.044881
18S_rRNA_M_Locati	458	G	331	751	1082	0.488027	0	0.328173	364	470	834	1.15361	0	0.535962	404	904	1308	0.27906	0	0.218306	0.360814	0.13172
18S_rRNA_M_Locati	459	G	444	569	1013	0.693677	0	0.409807	399	383	782	1.5493	0	0.60804	468	794	1262	0.53021	0	0.346674	0.454841	0.111352
18S_rRNA_M_Locati	460	A	702	467	1169	0.540285	0	0.350964	597	400	997	1.20332	0.00962984	0.546387	851	490	1341	0.61386	0.0450177	0.380543	0.425965	0.0860035
18S_rRNA_M_Locati	461	A	794	440	1234	0.502321	0	0.334544	601	314	915	1.58797	0.143713	0.613855	964	313	1277	0.848531	0.132003	0.459224	0.469208	0.114247
18S_rRNA_M_Locati	462	U	1604	416	2020	0.136517	0	0	1401	472	1873	0.237727	0	0.19215	2019	413	2432	0.00963602	0	0	0.06405	0.0905804
18S_rRNA_M_Locati	463	C	2737	661	3398	0.520993	0	0	4864	747	5611	0.615594	0	0	3608	708	4316	0.457941	0	0	0	0
18S_rRNA_M_Locati	464	A	2028	641	2669	0.328552	0	0	3237	592	3829	0.297691	0	0	4509	299	4808	0.487507	0	0	0	0
18S_rRNA_M_Locati	465	G	1670	420	2090	0.116	0	0	2559	619	3178	0.0918947	0	0	2855	637	3492	0.254061	0	0	0	0
18S_rRNA_M_Locati	466	G	1937	295	2232	0.203722	0	0	2801	683	3484	0.161938	0	0	2594	651	3245	0.211026	0	0	0	0
18S_rRNA_M_Locati	467	G	928	286	1214	0.487179	0	0.327767	1437	577	2014	0.548492	0	0.354324	1319	420	1739	0.496539	0	0.331919	0.338003	0.0116642
18S_rRNA_M_Locati	468	U	1130	448	1578	0.0297446	0	0.0289032	1530	950	2480	0.200605	0	0.167142	1571	796	2367	0.0103604	0	0	0.0653485	0.0729399
18S_rRNA_M_Locati	469	U	802	428	1230	0.225499	0	0.184128	1598	2552	4150	0.352793	0	0	1526	772	2298	0.0851336	0	0	0.0613759	0.0867986
18S_rRNA_M_Locati	470	C	1185	901	2086	0.419826	0	0	1367	3505	4872	0.529601	0	0	1573	1340	2913	0.419015	0	0	0	0
18S_rRNA_M_Locati	471	G	524	501	1025	0.138943	0	0.122097	436	1278	1714	0.449077	0	0.31003	298	529	827	0.948323	0.171285	0.48704	0.306389	0.149009
18S_rRNA_M_Locati	472	A	417	285	702	0.540888	0.0225374	0.351348	336	1265	1601	0.447524	0	0.309299	437	335	772	0.828647	0.0464987	0.453469	0.371372	0.0605363
18S_rRNA_M_Locati	473	U	281	329	610	0.67094	0.0153682	0.401928	305	1462	1767	0.269903	0	0.212633	279	253	532	1.55852	0.0857731	0.609595	0.408052	0.162117
18S_rRNA_M_Locati	474	U	9	47	56	18.2468	0.853739	0.948908	16	58	74	31.4031	0.905828	0.969538	20	14	34	40.4911	0.906428	0.976571	0.965006	0.0117391
18S_rRNA_M_Locati	475	C	281	355	636	0.54973	0	0.355086	354	1218	1572	0.431977	0	0.301799	422	53	475	1.82631	0.0613096	0.646662	0.434516	0.151579
18S_rRNA_M_Locati	476	C	197	904	1101	0.175852	0	0	600	1009	1609	0.313478	0	0.238776	446	317	763	0.683217	0	0.406215	0.214997	0.166687
18S_rRNA_M_Locati	477	G	164	670	834	0.133599	0	0.117979	1724	998	2722	0.318203	0	0	984	329	1313	0.0345003	0	0	0.0393263	0.0556158
18S_rRNA_M_Locati	478	G	635	294	929	0.0760335	0	0.0707315	1541	270	1811	0.0865771	0	0.0797193	1497	180	1677	0.183062	0	0	0.0501503	0.0356509
18S_rRNA_M_Locati	479	A	1330	312	1642	0.39434	0	0	3753	224	3977	0.564237	0	0	2805	239	3044	0.559292	0	0	0	0
18S_rRNA_M_Locati	480	G	1614	158	1772	0.435771	0	0	2437	147	2584	0.294898	0	0	2522	195	2717	0.475619	0	0	0	0
18S_rRNA_M_Locati	481	A	399	236	635	0.847187	0.0152164	0.459027	2256	301	2557	0.303232	0	0	753	138	891	0.901632	0	0.474416	0.311148	0.220104
18S_rRNA_M_Locati	482	G	330	142	472	1.54637	0.208426	0.607789	825	194	1019	0.771819	0.0563741	0.435849	690	203	893	0.918879	0.00358413	0.479142	0.507593	0.0730201
18S_rRNA_M_Locati	483	G	1634	124	1758	0.379414	0	0	881	526	1407	0.156802	0	0.135631	2232	153	2385	0.335229	0	0	0.0452105	0.0639373
18S_rRNA_M_Locati	484	G	1442	113	1555	0.274279	0	0	744	186	930	0.597422	0	0.374243	1767	156	1923	0.160817	0	0	0.124748	0.17642
18S_rRNA_M_Locati	485	A	1222	214	1436	0.167131	0	0	1178	367	1545	0.138745	0	0	1622	226	1848	0.134655	0	0	0	0
18S_rRNA_M_Locati	486	G	393	112	505	1.64174	0.243406	0.621927	259	394	653	0.92545	0.0782248	0.481023	427	215	642	1.59423	0.285325	0.614898	0.572616	0.0648296
18S_rRNA_M_Locati	487	C	695	110	805	0.658161	0.0268442	0.397219	308	213	521	1.26954	0.161455	0.559855	676	500	1176	0.328802	0	0.247601	0.401558	0.127514
18S_rRNA_M_Locati	488	C	742	145	887	0.620696	0.076101	0.383247	284	190	474	1.42891	0.26994	0.588803	646	487	1133	0.459485	0.0494436	0.315017	0.429023	0.116365
18S_rRNA_M_Locati	489	U	1306	461	1767	0.182636	0	0	540	538	1078	0.0630316	0	0.0593459	1128	875	2003	0.200826	0	0	0.019782	0.0279759
18S_rRNA_M_Locati	490	G	874	241	1115	0.437386	0.0632885	0.304482	382	373	755	0.791079	0.0562701	0.442004	680	705	1385	0.195414	0	0.163569	0.303352	0.113673
18S_rRNA_M_Locati	491	A	1734	414	2148	0.28832	0	0	798	1053	1851	0.273014	0	0	1153	830	1983	0.179665	0	0	0	0
18S_rRNA_M_Locati	492	G	1741	451	2192	0.293712	0	0	749	907	1656	0.13216	0	0	1163	920	2083	0.22066	0	0	0	0
18S_rRNA_M_Locati	493	A	1533	384	1917	0.0789248	0	0	639	668	1307	0.295727	0	0.228367	927	855	1782	0.0444257	0	0.0425589	0.0903087	0.0991563
18S_rRNA_M_Locati	494	A	1537	428	1965	0.0369843	0	0	849	838	1687	0.0866509	0	0.0797847	1126	1009	2135	0.0451883	0	0	0.0265949	0.0376109
18S_rRNA_M_Locati	495	A	981	702	1683	0.165103	0	0.141779	700	966	1666	0.174905	0	0.148943	712	679	1391	0.618934	0.0666144	0.382479	0.224401	0.111817
18S_rRNA_M_Locati	496	C	993	1380	2373	0.213241	0	0	645	3034	3679	0.513569	0	0	976	638	1614	0.423103	0	0.29744	0.0991465	0.140214
18S_rRNA_M_Locati	497	G	453	877	1330	0.504817	0.0217804	0.335635	352	1487	1839	0.125393	0	0.111475	662	1489	2151	0.0862557	0	0.0794404	0.175517	0.113973
18S_rRNA_M_Locati	498	G	377	660	1037	0.878409	0.0651573	0.467875	152	1313	1465	0.407905	0	0.289865	554	886	1440	0.676799	0.0101706	0.403793	0.387177	0.0736156
18S_rRNA_M_Locati	499	C	358	3183	3541	0.550417	0	0	111	3335	3446	0.478732	0	0	509	3606	4115	0.493232	0	0	0	0
18S_rRNA_M_Locati	500	U	274	2536	2810	0.446753	0	0	118	2417	2535	0.283741	0	0	563	4085	4648	0.580918	0	0	0	0
18S_rRNA_M_Locati	501	A	124	1046	1170	0.356884	0	0.263183	35	1371	1406	0.302306	0	0.232258	195	2357	2552	0.198755	0	0	0.165147	0.117457
18S_rRNA_M_Locati	502	C	49	1291	1340	0.0449664	0	0.0430622	16	1368	1384	0.226081	0	0.184502	172	1975	2147	0.100383	0	0	0.0758547	0.0788109
18S_rRNA_M_Locati	503	C	84	1379	1463	0.17242	0	0	22	1691	1713	0.134714	0	0	199	1862	2061	0.131986	0	0	0	0
18S_rRNA_M_Locati	504	A	42	525	567	1.09761	0.00676493	0.523707	18	866	884	0.738368	0.0374279	0.425024	201	472	673	1.60559	0.225329	0.616561	0.521764	0.0782066
18S_rRNA_M_Locati	505	C	75	1076	1151	0.101659	0	0	6	1254	1260	0.211913	0	0.174973	223	661	884	0.806654	0.0179824	0.44677	0.207248	0.183815
18S_rRNA_M_Locati	506	A	52	272	324	1.92335	0.218679	0.65862	5	571	576	1.60701	0.259653	0.616829	175	280	455	2.33894	0.148255	0.700964	0.658804	0.0343483
18S_rRNA_M_Locati	507	U	51	265	316	1.59299	0.221104	0.615093	17	954	971	0.488649	0.0108012	0.328477	258	334	592	1.2602	0.0357422	0.557978	0.500516	0.123865
18S_rRNA_M_Locati	508	C	1	99	100	6.72354	0.584058	0.871643	1	717	718	1.02276	0.0724478	0.505975	1	403	404	2.09665	0.0777611	0.677611	0.685076	0.149377
18S_rRNA_M_Locati	509	C	39	651	690	0.0081846	0	0.00812982	5	1718	1723	0.2089	0	0	118	1138	1256	0.111367	0	0	0.00270994	0.00383243
18S_rRNA_M_Locati	510	A	21	618	639	0.112882	0	0.101575	1	2174	2175	0.400485	0	0	29	1002	1031	0.137339	0	0.120857	0.074144	0.0530154
18S_rRNA_M_Locati	511	A	22	1016	1038	0.313036	0	0	2	2895	2897	0.5755	0	0	24	1364	1388	0.11971	0	0	0	0
18S_rRNA_M_Locati	512	G	70	1204	1274	0.392706	0	0	24	1510	1534	0.09827	0	0	45	3320	3365	0.666026	0	0	0	0
18S_rRNA_M_Locati	513	G	71	807	878	0.0286942	0	0.0279247	31	1783	1814	0.277649	0	0	7	1809	1816	0.239448	0	0	0.00930824	0.0131638
18S_rRNA_M_Locati	514	A	4	45	49	20.0804	0.845068	0.953467	1	167	168	7.34162	0.658403	0.880744	3	95	98	15.2419	0.778595	0.939015	0.924409	0.0314343
18S_rRNA_M_Locati	515	A	291	716	1007	0.0511464	0	0.0487037	84	1044	1128	0.0869599	0	0.0800681	35	741	776	1.04313	0.0398829	0.510876	0.213216	0.210867
18S_rRNA_M_Locati	516	G	417	867	1284	0.135893	0	0	69	854	923	0.22096	0	0.181133	21	1724	1745	0.140213	0	0	0.0603775	0.0853867
18S_rRNA_M_Locati	517	G	149	861	1010	0.226959	0	0.185126	19	907	926	0.0627712	0	0.0591237	9	1418	1427	0.0999066	0	0.0908898	0.111713	0.0535061
18S_rRNA_M_Locati	518	C	580	1701	2281	0.491479	0	0	78	1468	1546	0.503124	0	0	50	2589	2639	0.473977	0	0	0	0
18S_rRNA_M_Locati	519	A	287	1014	1301	0.0983018	0	0.089566	64	515	579	0.48705	0	0.327908	118	1476	1594	0.118621	0	0	0.139158	0.138384
18S_rRNA_M_Locati	520	G	143	583	726	1.13118	0.0361824	0.531119	34	210	244	2.45456	0.264604	0.711368	100	977	1077	0.297485	0	0.229442	0.490643	0.198816
18S_rRNA_M_Locati	521	C	414	1285	1699	0.0433072	0	0	125	412	537	0.677261	0	0.404238	443	1024	1467	0.00587345	0	0	0.134746	0.19056
18S_rRNA_M_Locati	522	A	656	875	1531	0.0994996	0	0.0905491	197	285	482	0.874925	0.00109461	0.467161	744	795	1539	0.0742929	0	0	0.185903	0.202286
18S_rRNA_M_Locati	523	G	551	1223	1774	0.0371518	0	0	166	272	438	1.21028	0.13353	0.548133	462	1009	1471	0.0684028	0	0	0.182711	0.258392
18S_rRNA_M_Locati	524	G	338	1294	1632	0.0400218	0	0.0385043	156	741	897	0.0114452	0	0.0113281	201	466	667	1.04133	0.0482993	0.510499	0.186777	0.229174
18S_rRNA_M_Locati	525	C	1052	2487	3539	0.604648	0	0	609	1152	1761	0.547591	0	0	458	1053	1511	0.239146	0	0	0	0
18S_rRNA_M_Locati	526	G	296	672	968	0.715984	0	0.417495	203	766	969	0.0440092	0	0	175	485	660	0.853622	0.0104536	0.460892	0.292796	0.207794
18S_rRNA_M_Locati	527	C	809	2060	2869	0.512493	0	0	846	1027	1873	0.548779	0	0	717	1720	2437	0.587317	0	0	0	0
18S_rRNA_M_Locati	528	G	194	686	880	0.719536	0	0.418724	196	536	732	0.33012	0	0.248443	162	497	659	0.79463	0.00673709	0.443156	0.370108	0.0866063
18S_rRNA_M_Locati	529	C	336	1303	1639	0.212263	0	0	633	887	1520	0.444364	0	0	483	603	1086	0.0221404	0	0	0	0
18S_rRNA_M_Locati	530	A	6	56	62	20.366	0.851589	0.953905	19	15	34	26.6273	0.891745	0.964802	21	52	73	14.1824	0.782214	0.934967	0.951225	0.0123267
18S_rRNA_M_Locati	531	A	505	334	839	0.400767	0	0.286349	622	82	704	0.151946	0	0.132067	614	322	936	0.0856753	0	0.078992	0.165803	0.08795
18S_rRNA_M_Locati	532	A	877	235	1112	0.0855546	0	0	862	23	885	0.210171	0	0	1240	205	1445	0.364085	0	0	0	0
18S_rRNA_M_Locati	533	U	683	228	911	0.142203	0	0.124618	616	13	629	0.0371429	0	0.0358676	721	457	1178	0.215597	0	0	0.0534953	0.0523799
18S_rRNA_M_Locati	534	U	569	212	781	0.273245	0	0.214821	719	20	739	0.29542	0	0	632	715	1347	0.416395	0	0	0.071607	0.101268
18S_rRNA_M_Locati	535	A	345	105	450	1.25615	0.0755606	0.557314	307	3	310	0.624795	0	0.3853	186	373	559	0.475337	0	0.322579	0.421731	0.0992321
18S_rRNA_M_Locati	536	C	670	84	754	0.222252	0	0.182035	250	2	252	0.62332	0	0.384916	263	366	629	0.173739	0	0.148222	0.238391	0.104524
18S_rRNA_M_Locati	537	C	1239	75	1314	0.304698	0	0	253	5	258	0.504719	0	0.336287	442	278	720	0.0195562	0	0	0.112096	0.158527
18S_rRNA_M_Locati	538	C	1564	103	1667	0.475446	0	0	667	22	689	0.593205	0	0	641	225	866	0.293772	0	0	0	0
18S_rRNA_M_Locati	539	A	1218	43	1261	0.313277	0	0	128	17	145	0.877017	0.0140966	0.468951	331	104	435	0.256371	0	0.20443	0.22446	0.191972
18S_rRNA_M_Locati	540	U	1559	39	1598	0.524501	0	0	156	5	161	0.340329	0	0.255089	420	67	487	0.0913479	0	0	0.0850298	0.12025
18S_rRNA_M_Locati	541	U	169	36	205	3.18501	0.366127	0.761935	32	6	38	3.54416	0.319225	0.784363	80	30	110	2.49069	0.389945	0.71537	0.75389	0.0287352
18S_rRNA_M_Locati	542	U	31	43	74	10.0326	0.705445	0.91046	34	7	41	2.52672	0	0.72132	117	20	137	1.38543	0.0608064	0.582557	0.738112	0.134391
18S_rRNA_M_Locati	543	C	835	52	887	0.235836	0	0	102	5	107	0.101852	0	0.0932203	337	18	355	0.303184	0	0	0.0310734	0.0439445
18S_rRNA_M_Locati	544	C	723	110	833	0.273048	0	0	38	30	68	0.506119	0	0.339307	236	16	252	0.188142	0	0	0.113102	0.159951
18S_rRNA_M_Locati	545	G	217	56	273	1.18309	0.0134157	0.542841	7	25	32	1.22054	0.112811	0.557264	28	12	40	3.24228	0.40707	0.768697	0.622934	0.103238
18S_rRNA_M_Locati	546	A	171	39	210	1.9674	0	0.664066	10	19	29	1.62407	0	0.626876	31	18	49	1.98711	0.076737	0.669712	0.653551	0.0190025
18S_rRNA_M_Locati	547	C	170	291	461	0.282275	0	0.220508	28	22	50	0.530283	0	0.351024	28	33	61	1.07814	0	0.522858	0.364797	0.123817
18S_rRNA_M_Locati	548	A	144	206	350	1.09383	0	0.523117	12	24	36	1.46366	0.182256	0.60069	17	23	40	2.50108	0.130396	0.719386	0.614398	0.0807103
18S_rRNA_M_Locati	549	C	191	293	484	0.595006	0	0.373526	14	61	75	0.225292	0	0.185864	20	20	40	2.5607	0.163212	0.724117	0.427836	0.223071
18S_rRNA_M_Locati	550	G	294	216	510	0.675321	0	0.403571	34	45	79	0.409306	0	0.29303	23	84	107	0.364918	0	0.269181	0.321927	0.0585459
18S_rRNA_M_Locati	551	G	526	277	803	0.237244	0	0.191945	42	68	110	0.49009	0	0.3309	69	52	121	1.1459	0	0.536043	0.352963	0.141341
18S_rRNA_M_Locati	552	A	1023	813	1836	0.492276	0	0	74	176	250	0.343161	0	0	182	23	205	0.379612	0	0.27613	0.0920433	0.130169
18S_rRNA_M_Locati	553	G	786	365	1151	0.0487269	0	0	35	103	138	0.63789	0	0.391176	123	95	218	0.658245	0	0.398049	0.263075	0.186043
18S_rRNA_M_Locati	554	A	1219	828	2047	0.455452	0	0	45	126	171	0.792765	0	0.443641	178	183	361	0.44868	0	0.310308	0.251316	0.185857
18S_rRNA_M_Locati	555	G	206	95	301	3.59235	0.284821	0.782811	9	53	62	5.04744	0.450437	0.836837	34	96	130	4.08516	0.155658	0.804557	0.808068	0.0221955
18S_rRNA_M_Locati	556	G	1279	343	1622	0.212713	0	0	77	288	365	0.0968731	0	0.0885381	233	163	396	0.883123	0	0.469595	0.186045	0.203733
18S_rRNA_M_Locati	557	U	2054	825	2879	0.615795	0	0	132	793	925	0.604308	0	0	538	1585	2123	0.715798	0	0	0	0
18S_rRNA_M_Locati	558	A	20	5	25	53.9739	0.925778	0.982497	1	23	24	21.1076	0.756718	0.956497	5	20	25	34.3765	0.78128	0.97279	0.970595	0.0107273
18S_rRNA_M_Locati	559	G	471	453	924	0.407183	0	0.289583	41	655	696	0.226479	0	0	211	752	963	0.066171	0	0	0.0965276	0.136511
18S_rRNA_M_Locati	560	U	1460	788	2248	0.479107	0	0	165	1099	1264	0.594256	0	0	520	2105	2625	0.697245	0	0	0	0
18S_rRNA_M_Locati	561	G	757	408	1165	0.0982276	0	0.0895118	44	557	601	0.0279254	0	0.0272108	240	801	1041	0.00574749	0	0.00572011	0.0408142	0.0355345
18S_rRNA_M_Locati	562	A	753	230	983	0.437579	0	0.304601	54	443	497	0.333668	0	0.250565	347	538	885	0.32458	0	0.245253	0.266806	0.0268129
18S_rRNA_M_Locati	563	C	91	9	100	15.0634	0.804307	0.938325	12	86	98	6.49125	0.606613	0.867681	35	34	69	18.8167	0.827977	0.950222	0.918743	0.0364315
18S_rRNA_M_Locati	564	G	477	736	1213	0.356324	0	0.262873	27	1200	1227	0.443893	0	0	381	380	761	0.986687	0	0.496978	0.253284	0.203004
18S_rRNA_M_Locati	565	A	1003	791	1794	0.0307768	0	0.0298741	71	874	945	0.15303	0	0	768	530	1298	0.31455	0	0.239423	0.0897658	0.106524
18S_rRNA_M_Locati	566	A	965	815	1780	0.1552	0	0.134414	131	313	444	1.13458	0.0558496	0.532084	977	468	1445	0.334386	0	0.250722	0.30574	0.166944
18S_rRNA_M_Locati	567	A	1123	697	1820	0.189414	0	0.159323	237	280	517	0.983998	0.0755421	0.49645	1119	463	1582	0.321941	0	0.243653	0.299809	0.143245
18S_rRNA_M_Locati	568	A	1844	704	2548	0.110043	0	0	484	195	679	0.670768	0.0533217	0.401827	1940	334	2274	0.0409133	0	0.0393218	0.147049	0.180868
18S_rRNA_M_Locati	569	A	2401	813	3214	0.291896	0	0	740	161	901	0.373282	0.00395621	0.272037	2116	376	2492	0.0564737	0	0.0534752	0.108504	0.117678
18S_rRNA_M_Locati	570	U	3674	704	4378	0.482878	0	0	1911	134	2045	0.388015	0	0	4636	441	5077	0.482016	0	0	0	0
18S_rRNA_M_Locati	571	A	2299	890	3189	0.263469	0	0	1239	65	1304	0.0383908	0	0.0369987	2858	271	3129	0.0512922	0	0	0.0123329	0.0174414
18S_rRNA_M_Locati	572	A	2182	555	2737	0.168172	0	0	1977	41	2018	0.359837	0	0	3230	187	3417	0.119609	0	0	0	0
18S_rRNA_M_Locati	573	C	908	1211	2119	0.027935	0	0.0271883	1955	140	2095	0.376792	0	0	3221	147	3368	0.119185	0	0	0.00906278	0.0128167
18S_rRNA_M_Locati	574	A	1887	627	2514	0.235485	0	0	1809	37	1846	0.288468	0	0	4711	67	4778	0.44288	0	0	0	0
18S_rRNA_M_Locati	575	A	148	666	814	1.31361	0.237673	0.568076	1527	45	1572	0.178315	0	0	3101	80	3181	0.16895	0	0	0.189359	0.267793
18S_rRNA_M_Locati	576	U	267	1500	1767	0.145877	0	0	1575	48	1623	0.253476	0	0	2990	84	3074	0.20236	0	0	0	0
18S_rRNA_M_Locati	577	G	344	263	607	1.27239	0.208308	0.56034	445	20	465	1.57217	0.371904	0.611734	1170	54	1224	0.906703	0.164208	0.475738	0.549271	0.0560692
18S_rRNA_M_Locati	578	C	545	233	778	0.508772	0	0.337496	562	81	643	0.659265	0.10237	0.397696	2001	37	2038	0.0121574	0	0	0.245064	0.175021
18S_rRNA_M_Locati	579	A	281	227	508	1.14052	0.110706	0.533312	659	46	705	0.308184	0	0.235837	636	12	648	2.03366	0.320607	0.670706	0.479952	0.1815
18S_rRNA_M_Locati	580	G	112	200	312	2.3666	0.346354	0.703632	511	39	550	0.478	0	0.323807	113	44	157	10.7451	0.762062	0.915351	0.647597	0.244726
18S_rRNA_M_Locati	581	G	727	85	812	0.199932	0	0.16679	599	17	616	0.143778	0	0.125883	812	11	823	0.933684	0.138429	0.483156	0.25861	0.159654
18S_rRNA_M_Locati	582	U	677	68	745	0.403694	0	0.287869	817	9	826	0.268789	0	0	1778	26	1804	0.230046	0	0	0.0959563	0.135703
18S_rRNA_M_Locati	583	C	981	408	1389	0.263501	0	0	557	24	581	0.0138603	0	0	1532	219	1751	0.233872	0	0	0	0
18S_rRNA_M_Locati	584	U	805	250	1055	0.0964015	0	0.0880014	472	22	494	0.139304	0	0.122488	1428	69	1497	0.0858107	0	0	0.0701633	0.051572
18S_rRNA_M_Locati	585	C	1054	300	1354	0.117122	0	0	429	10	439	0.239646	0	0.193673	1636	103	1739	0.258218	0	0	0.0645578	0.0912985
18S_rRNA_M_Locati	586	U	934	374	1308	0.0105	0	0	442	16	458	0.163786	0	0.140999	1591	95	1686	0.219779	0	0	0.0469998	0.0664678
18S_rRNA_M_Locati	587	U	1028	803	1831	0.294857	0	0	420	44	464	0.125257	0	0.111527	1648	77	1725	0.247077	0	0	0.0371757	0.0525744
18S_rRNA_M_Locati	588	U	727	649	1376	0.0101025	0	0	451	33	484	0.0791982	0	0.0735266	1180	47	1227	0.0657347	0	0.0617273	0.0450846	0.0322415
18S_rRNA_M_Locati	589	C	600	1252	1852	0.288175	0	0	628	79	707	0.274309	0	0	1368	148	1516	0.196982	0	0	0	0
18S_rRNA_M_Locati	590	G	267	1172	1439	0.0408719	0	0	200	69	269	1.43486	0.158779	0.590196	569	152	721	0.838166	0.122329	0.456323	0.34884	0.252649
18S_rRNA_M_Locati	591	A	368	893	1261	0.193291	0	0.162089	284	95	379	1.19939	0	0.545981	653	113	766	0.850398	0.0414327	0.4599	0.389323	0.164477
18S_rRNA_M_Locati	592	G	482	1026	1508	0.0374494	0	0	629	64	693	0.300352	0	0.231234	900	117	1017	0.369581	0	0.270043	0.167092	0.11921
18S_rRNA_M_Locati	593	G	199	681	880	0.774864	0.103042	0.436856	384	66	450	1.51192	0.162178	0.602431	282	126	408	3.00386	0.41574	0.750699	0.596662	0.128191
18S_rRNA_M_Locati	594	C	373	594	967	0.596993	0.0286076	0.374065	683	36	719	0.829907	0.0839677	0.453869	649	153	802	1.09787	0.132487	0.523637	0.450523	0.0611082
18S_rRNA_M_Locati	595	C	829	251	1080	0.491243	0.00552308	0.329623	1081	3	1084	0.354941	0	0.262139	1582	107	1689	0.0292768	0	0.0284604	0.206741	0.129039
18S_rRNA_M_Locati	596	C	1218	709	1927	0.187546	0	0	2076	17	2093	0.256765	0	0	2390	371	2761	0.341443	0	0	0	0
18S_rRNA_M_Locati	597	U	2016	1201	3217	0.524035	0	0	3329	98	3427	0.517007	0	0	3062	426	3488	0.420617	0	0	0	0
18S_rRNA_M_Locati	598	G	425	408	833	1.36791	0.184875	0.577979	876	313	1189	0.820373	0.0512183	0.45087	854	482	1336	0.968453	0.0245779	0.492174	0.507008	0.0529412
18S_rRNA_M_Locati	599	C	813	1187	2000	0.0256538	0	0	2849	29	2878	0.24483	0	0	1352	2672	4024	0.351934	0	0	0	0
18S_rRNA_M_Locati	600	A	1097	264	1361	0.594436	0.0446056	0.372991	2687	11	2698	0.0901404	0	0	1387	362	1749	0.826222	0.0850234	0.452563	0.275185	0.197278
18S_rRNA_M_Locati	601	A	1253	1060	2313	0.0575387	0	0	1821	182	2003	0.361028	0.00570934	0.265359	1491	712	2203	0.545548	0.069988	0.353084	0.206148	0.150103
18S_rRNA_M_Locati	602	U	723	1268	1991	0.19648	0	0.164284	1812	528	2340	0.234477	0.00580488	0.190006	1325	1948	3273	0.104656	0	0.0947672	0.149686	0.0402281
18S_rRNA_M_Locati	603	U	1082	1751	2833	0.173861	0	0	2640	529	3169	0.109628	0	0	1932	2308	4240	0.128581	0	0	0	0
18S_rRNA_M_Locati	604	G	985	2658	3643	0.390084	0	0	2799	684	3483	0.194859	0	0	2165	3521	5686	0.352895	0	0	0	0
18S_rRNA_M_Locati	605	G	545	2030	2575	0.0793651	0	0	1724	1305	3029	0.0507774	0	0	1166	3206	4372	0.0896943	0	0	0	0
18S_rRNA_M_Locati	606	A	685	1846	2531	0.0769747	0	0	2016	2040	4056	0.336127	0	0	1625	2867	4492	0.115995	0	0	0	0
18S_rRNA_M_Locati	607	A	649	1485	2134	0.0830237	0	0.0766923	1834	1306	3140	0.143436	0	0	1183	2563	3746	0.0811108	0	0.075044	0.0505788	0.0357709
18S_rRNA_M_Locati	608	U	854	2352	3206	0.345099	0	0	1014	2749	3763	0.318131	0	0	1484	4294	5778	0.342872	0	0	0	0
18S_rRNA_M_Locati	609	G	630	1350	1980	0.0648438	0	0.060924	459	1023	1482	0.811621	0.182604	0.448175	808	3055	3863	0.00634346	0	0	0.1697	0.198476
18S_rRNA_M_Locati	610	A	430	1484	1914	0.0135248	0	0.0133512	412	2458	2870	0.185023	0	0	555	3611	4166	0.158462	0	0	0.0044504	0.00629382
18S_rRNA_M_Locati	611	G	318	808	1126	0.60493	0.104981	0.377128	508	607	1115	1.09934	0.223204	0.523884	453	2356	2809	0.163871	0	0.140841	0.347285	0.157794
18S_rRNA_M_Locati	612	U	443	1205	1648	0.0446601	0	0	709	1197	1906	0.0768339	0	0.0713864	460	3001	3461	0.17202	0	0	0.0237955	0.0336519
18S_rRNA_M_Locati	613	G	335	481	816	0.883599	0.127254	0.469406	485	907	1392	0.346351	0	0.257389	308	1312	1620	0.716177	0.107205	0.417459	0.381418	0.0902297
18S_rRNA_M_Locati	614	C	596	1263	1859	0.310824	0	0	969	1512	2481	0.37053	0	0	518	2417	2935	0.187844	0	0	0	0
18S_rRNA_M_Locati	615	A	387	588	975	0.229998	0	0.187146	676	686	1362	0.085946	0	0.0791974	413	1294	1707	0.277062	0	0.217052	0.161132	0.0592089
18S_rRNA_M_Locati	616	U	250	950	1200	0.127496	0	0	930	615	1545	0.138702	0	0	332	832	1164	0.708422	0.101496	0.414873	0.138291	0.195573
18S_rRNA_M_Locati	617	C	303	571	874	0.127695	0	0.11335	954	431	1385	0.167027	0	0	335	658	993	0.763447	0.072097	0.433176	0.182176	0.183418
18S_rRNA_M_Locati	618	C	127	499	626	0.53406	0.0200683	0.348497	370	462	832	0.339109	0	0.253462	272	857	1129	0.404061	0	0.287962	0.29664	0.0392803
18S_rRNA_M_Locati	619	C	172	1004	1176	0.292684	0	0	399	377	776	0.304276	0	0.233521	333	1442	1775	0.20346	0	0	0.0778405	0.110083
18S_rRNA_M_Locati	620	A	197	401	598	0.458245	0.0283076	0.314604	420	309	729	0.286941	0	0.223201	202	1682	1884	0.279464	0	0	0.179268	0.13214
18S_rRNA_M_Locati	621	A	148	427	575	0.478356	0.0136369	0.323954	321	424	745	0.154543	0	0.134012	122	1336	1458	0.0550301	0	0	0.152655	0.132909
18S_rRNA_M_Locati	622	A	10	376	386	1.34028	0.252888	0.573334	68	165	233	2.79012	0.421499	0.736987	19	872	891	0.659143	0.045721	0.397548	0.56929	0.138605
18S_rRNA_M_Locati	623	C	24	750	774	0.200889	0	0.167463	57	294	351	1.5346	0.239554	0.606139	33	596	629	1.58455	0.28759	0.613462	0.462355	0.208541
18S_rRNA_M_Locati	624	C	200	580	780	0.255356	0	0.203621	122	355	477	0.853719	0.129344	0.461064	252	686	938	0.807833	0.14366	0.447115	0.3706	0.118209
18S_rRNA_M_Locati	625	C	262	680	942	0.125144	0	0.11133	379	704	1083	0.18074	0	0	511	1671	2182	0.230895	0	0	0.03711	0.0524815
18S_rRNA_M_Locati	626	A	340	473	813	0.3865	0.0165162	0.279007	466	444	910	0.154799	0	0.134176	575	613	1188	0.589702	0.102133	0.371148	0.261444	0.097537
18S_rRNA_M_Locati	627	U	499	1150	1649	0.306296	0	0	826	849	1675	0.261695	0	0	783	1857	2640	0.26352	0	0	0	0
18S_rRNA_M_Locati	628	G	419	1056	1475	0.0939551	0	0	531	422	953	0.860832	0	0.462867	831	1438	2269	0.0409496	0	0.0393553	0.167407	0.209538
18S_rRNA_M_Locati	629	G	783	1281	2064	0.310912	0	0	845	905	1750	0.221816	0	0.181631	1584	1330	2914	0.109983	0	0	0.0605437	0.0856217
18S_rRNA_M_Locati	630	G	604	461	1065	0.485699	0	0.327123	609	307	916	1.82529	0.2277	0.646303	1326	721	2047	0.403488	0	0.28759	0.420339	0.160594
18S_rRNA_M_Locati	631	C	311	1378	1689	0.0574556	0	0	513	893	1406	1.04318	0.131973	0.510745	620	1778	2398	0.274777	0	0.215619	0.242121	0.209351
18S_rRNA_M_Locati	632	G	782	387	1169	0.450893	0	0.310952	667	1881	2548	0.175733	0	0.149517	1079	1216	2295	0.37424	0	0.272412	0.244294	0.0688395
18S_rRNA_M_Locati	633	A	1096	661	1757	0.0480217	0	0	1120	3539	4659	0.353827	0	0	2171	2440	4611	0.356748	0	0	0	0
18S_rRNA_M_Locati	634	G	1387	1499	2886	0.477481	0	0	1831	5506	7337	0.619188	0	0	2802	3749	6551	0.592889	0	0	0	0
18S_rRNA_M_Locati	635	G	1268	1116	2384	0.360391	0	0	1377	4531	5908	0.497069	0	0	2315	1967	4282	0.348307	0	0	0	0
18S_rRNA_M_Locati	636	A	135	690	825	0.949758	0.120881	0.487418	375	3081	3456	0.0940507	0	0	247	1503	1750	0.628212	0	0.385965	0.291128	0.209984
18S_rRNA_M_Locati	637	C	548	1229	1777	0.16751	0	0	624	2437	3061	0.00422382	0	0	1185	2105	3290	0.248239	0	0	0	0
18S_rRNA_M_Locati	638	C	425	848	1273	0.159925	0	0.137969	376	1547	1923	0.562942	0.00485611	0.360301	489	1349	1838	0.33407	0	0.250517	0.249595	0.090769
18S_rRNA_M_Locati	639	C	568	749	1317	0.0729809	0	0.0680651	546	1845	2391	0.112797	0	0.101402	368	969	1337	0.703247	0.0312799	0.413067	0.194178	0.155375
18S_rRNA_M_Locati	640	A	502	411	913	0.506297	0.0282637	0.336365	561	735	1296	0.860413	0.0729686	0.462677	445	573	1018	0.96671	0.0414151	0.491782	0.430274	0.067459
18S_rRNA_M_Locati	641	U	694	410	1104	0.0637808	0	0.0600078	746	373	1119	0.705645	0	0.413928	610	356	966	0.634999	0	0.388625	0.28752	0.161207
18S_rRNA_M_Locati	642	U	520	393	913	0.185983	0	0.156963	737	405	1142	0.333654	0	0.250345	609	208	817	0.649796	0	0.394157	0.267155	0.0975608
18S_rRNA_M_Locati	643	G	1170	326	1496	0.303073	0	0	1311	122	1433	0.0945762	0	0	889	285	1174	0.0876217	0	0.0806258	0.0268753	0.0380074
18S_rRNA_M_Locati	644	G	895	398	1293	0.211841	0	0	1615	65	1680	0.312241	0	0	1652	305	1957	0.453223	0	0	0	0
18S_rRNA_M_Locati	645	A	517	378	895	0.223264	0	0.182682	609	210	819	0.587791	0	0.370479	647	417	1064	0.106771	0	0.0965526	0.216571	0.114369
18S_rRNA_M_Locati	646	G	399	565	964	0.134243	0	0.118463	826	262	1088	0.133293	0	0.117711	1054	318	1372	0.182334	0	0	0.0787245	0.0556675
18S_rRNA_M_Locati	647	G	11	37	48	24.0299	0.898396	0.960831	35	16	51	26.1991	0.890447	0.963916	25	30	55	21.8409	0.872966	0.956967	0.960571	0.00284273
18S_rRNA_M_Locati	648	G	455	182	637	0.91125	0.148136	0.477174	149	269	418	2.48536	0.370786	0.713574	232	307	539	1.34609	0.185895	0.574212	0.58832	0.0970244
18S_rRNA_M_Locati	649	C	1281	487	1768	0.364318	0	0	716	401	1117	0.278066	0	0.21772	1197	671	1868	0.386255	0	0	0.0725734	0.102634
18S_rRNA_M_Locati	650	A	919	272	1191	0.11263	0	0.101305	580	1290	1870	0.225916	0	0	1046	293	1339	0.0126368	0	0	0.0337685	0.0477558
18S_rRNA_M_Locati	651	A	1769	306	2075	0.364649	0	0	1190	2204	3394	0.610663	0	0	1658	368	2026	0.369018	0	0	0	0
18S_rRNA_M_Locati	652	G	1218	210	1428	0.0902107	0	0.0827993	753	919	1672	0.0125257	0	0	733	232	965	0.636565	0	0.38921	0.157337	0.167408
18S_rRNA_M_Locati	653	U	958	218	1176	0.429029	0	0.300403	1271	739	2010	0.190778	0	0	782	266	1048	0.561424	0	0.359778	0.22006	0.157483
18S_rRNA_M_Locati	654	C	1553	186	1739	0.0744444	0	0.0693235	1480	421	1901	0.0850742	0	0	1137	405	1542	0.19092	0	0.1604	0.0765745	0.0656835
18S_rRNA_M_Locati	655	U	735	150	885	1.661	0.265811	0.624466	630	188	818	1.5831	0.170344	0.613157	740	319	1059	1.27396	0.0833447	0.560471	0.599365	0.0278867
18S_rRNA_M_Locati	656	G	2971	309	3280	0.276572	0	0	1791	350	2141	0.00632846	0	0	2215	738	2953	0.109851	0	0	0	0
18S_rRNA_M_Locati	657	G	1814	277	2091	0.303197	0	0.232742	977	464	1441	0.558769	0	0.358628	1372	632	2004	0.512569	0	0.338985	0.310118	0.0552978
18S_rRNA_M_Locati	658	U	2519	470	2989	0.0463025	0	0	1736	830	2566	0.155525	0	0	3036	654	3690	0.108498	0	0	0	0
18S_rRNA_M_Locati	659	G	1339	301	1640	0.989112	0.120716	0.497416	657	259	916	1.74888	0.281991	0.636468	1150	330	1480	1.78831	0.274806	0.641515	0.5918	0.0667714
18S_rRNA_M_Locati	660	C	3350	443	3793	0.162871	0	0	1631	351	1982	0.235972	0	0.190998	3220	527	3747	0.142953	0	0.125103	0.105367	0.0792137
18S_rRNA_M_Locati	661	C	6019	465	6484	0.545534	0	0	4786	426	5212	0.592651	0	0	8172	386	8558	0.52695	0	0	0	0
18S_rRNA_M_Locati	662	A	4400	567	4967	0.355799	0	0	3430	311	3741	0.366393	0	0	6723	365	7088	0.344305	0	0	0	0
18S_rRNA_M_Locati	663	G	2359	289	2648	0.259679	0	0.206209	1554	139	1693	0.518556	0	0.341612	2719	395	3114	0.660214	0	0.397745	0.315189	0.0803957
18S_rRNA_M_Locati	664	C	3269	652	3921	0.194212	0	0	2822	382	3204	0.243463	0	0	5272	1483	6755	0.268227	0	0	0	0
18S_rRNA_M_Locati	665	A	2809	819	3628	0.130213	0	0	2875	346	3221	0.249669	0	0	5889	1626	7515	0.345312	0	0	0	0
18S_rRNA_M_Locati	666	G	1420	344	1764	0.851407	0.135055	0.460011	1003	242	1245	1.09709	0.159308	0.52335	3124	879	4003	0.308381	0	0.235741	0.406367	0.123391
18S_rRNA_M_Locati	667	C	1108	685	1793	0.651016	0	0.394445	762	661	1423	0.701046	0	0.412296	2282	1195	3477	0.425893	0	0.298745	0.368496	0.0498565
18S_rRNA_M_Locati	668	C	1666	750	2416	0.0511837	0	0.0487107	815	1167	1982	0.0583179	0	0.0551306	2854	3856	6710	0.395743	0	0	0.0346138	0.0246156
18S_rRNA_M_Locati	669	G	1374	420	1794	0.31636	0	0.240431	584	1296	1880	0.0317325	0	0.0307724	1949	680	2629	0.547634	0	0.353939	0.208381	0.133865
18S_rRNA_M_Locati	670	C	2313	841	3154	0.340757	0	0	960	1777	2737	0.351489	0	0	3622	1611	5233	0.33113	0	0	0	0
18S_rRNA_M_Locati	671	G	2663	1393	4056	0.566582	0	0	1086	2241	3327	0.541283	0	0	3966	1213	5179	0.404254	0	0	0	0
18S_rRNA_M_Locati	672	G	623	1012	1635	0.108591	0	0.0980084	272	1106	1378	0.166095	0	0.142525	687	702	1389	1.25014	0.177957	0.555762	0.265432	0.206097
18S_rRNA_M_Locati	673	U	22	43	65	27.7699	0.905801	0.96575	18	41	59	28.392	0.902957	0.966525	24	18	42	71.8119	0.957195	0.986581	0.972952	0.00964233
18S_rRNA_M_Locati	674	A	648	745	1393	0.178941	0	0.151874	303	946	1249	0.296596	0	0.228891	691	860	1551	0.788853	0	0.441141	0.273969	0.122319
18S_rRNA_M_Locati	675	A	796	416	1212	0.258771	0	0.205709	540	561	1101	0.405172	0	0.28853	981	511	1492	0.632701	0	0.387677	0.293972	0.0743877
18S_rRNA_M_Locati	676	U	932	375	1307	0.136876	0	0.120477	720	508	1228	0.195245	0	0.163462	1154	680	1834	0.265183	0	0.209691	0.164544	0.0364293
18S_rRNA_M_Locati	677	U	848	246	1094	0.290036	0	0.224987	492	357	849	0.70417	0	0.41349	1376	1408	2784	0.274973	0	0	0.212825	0.169025
18S_rRNA_M_Locati	678	C	572	379	951	0.407516	0	0.289745	895	850	1745	0.256847	0	0	2032	1524	3556	0.50596	0	0	0.0965816	0.136587
18S_rRNA_M_Locati	679	C	918	690	1608	0.151626	0	0	1218	1223	2441	0.458818	0	0	1862	1907	3769	0.530212	0	0	0	0
18S_rRNA_M_Locati	680	A	619	610	1229	0.264164	0	0.209098	1134	887	2021	0.281806	0	0	593	1060	1653	0.238351	0	0.192569	0.133889	0.094914
18S_rRNA_M_Locati	681	G	263	596	859	0.971098	0.24972	0.492959	290	315	605	1.70084	0.266269	0.63013	100	571	671	2.13424	0.374113	0.681267	0.601452	0.0795058
18S_rRNA_M_Locati	682	C	501	1678	2179	0.209817	0	0	454	466	920	0.800893	0.086564	0.444988	747	670	1417	0.430701	0	0.30119	0.248726	0.185415
18S_rRNA_M_Locati	683	U	524	1171	1695	0.144431	0	0.126269	531	957	1488	0.0982986	0	0.0895556	746	661	1407	0.423603	0	0.297706	0.171177	0.0907162
18S_rRNA_M_Locati	684	C	578	1493	2071	0.0732304	0	0	579	1330	1909	0.181478	0	0	764	723	1487	0.233901	0	0.189665	0.0632218	0.0894091
18S_rRNA_M_Locati	685	C	828	1980	2808	0.265452	0	0	910	1801	2711	0.429499	0	0	1223	1054	2277	0.221725	0	0	0	0
18S_rRNA_M_Locati	686	A	554	1440	1994	0.107781	0	0.0973382	491	787	1278	0.352515	0	0.260787	958	632	1590	0.143125	0	0.125274	0.161133	0.0713832
18S_rRNA_M_Locati	687	A	763	1499	2262	0.013949	0	0.0137631	727	823	1550	0.216814	0	0.178276	1171	511	1682	0.21261	0	0.175418	0.122486	0.0768874
18S_rRNA_M_Locati	688	U	1059	2359	3418	0.343863	0	0	1091	904	1995	0.0328936	0	0.0318615	1343	1277	2620	0.183018	0	0	0.0106205	0.0150197
18S_rRNA_M_Locati	689	A	327	2580	2907	0.191097	0	0	729	860	1589	0.514277	0	0.33976	794	1138	1932	0.323797	0	0.244693	0.194818	0.14312
18S_rRNA_M_Locati	690	G	46	115	161	15.922	0.850299	0.941249	50	67	117	22.2176	0.889211	0.957279	65	41	106	27.3418	0.909645	0.965035	0.954521	0.00990447
18S_rRNA_M_Locati	691	C	1307	3059	4366	0.466753	0	0	1414	1833	3247	0.215613	0	0	2049	2148	4197	0.300455	0	0	0	0
18S_rRNA_M_Locati	692	G	460	1144	1604	0.709173	0.0609658	0.415073	596	1956	2552	0.105405	0	0.0953883	610	1829	2439	0.60291	0	0.376231	0.295564	0.142431
18S_rRNA_M_Locati	693	U	876	1842	2718	0.00806669	0	0.00800506	1569	3456	5025	0.453073	0	0	940	4088	5028	0.204178	0	0	0.00266835	0.00377362
18S_rRNA_M_Locati	694	A	597	1450	2047	0.426796	0.0117496	0.299231	1213	2576	3789	0.200082	0	0	671	2580	3251	0.396307	0	0.283887	0.194373	0.137585
18S_rRNA_M_Locati	695	U	1117	1988	3105	0.0657795	0	0	2419	2759	5178	0.420495	0	0	1532	4710	6242	0.269477	0	0	0	0
18S_rRNA_M_Locati	696	G	1058	1891	2949	0.0511751	0	0.0486994	1396	1054	2450	0.404787	0	0.288232	1403	2578	3981	0.283484	0	0.220914	0.185948	0.100866
18S_rRNA_M_Locati	697	C	710	2536	3246	0.0174691	0	0.0171744	1231	1508	2739	0.310393	0.0142762	0.236936	1440	4335	5775	0.0820368	0	0	0.0847036	0.107873
18S_rRNA_M_Locati	698	U	696	3385	4081	0.210518	0	0	1789	1941	3730	0.0697906	0	0	1432	11599	13031	0.65057	0	0	0	0
18S_rRNA_M_Locati	699	A	734	2984	3718	0.109411	0	0	1542	1486	3028	0.157654	0	0.136223	1003	3056	4059	0.359767	0	0.264628	0.133617	0.10805
18S_rRNA_M_Locati	700	A	915	2337	3252	0.0307579	0	0.029849	1824	820	2644	0.276051	0	0.216397	1222	2242	3464	0.547488	0	0.353857	0.200034	0.132781
18S_rRNA_M_Locati	701	C	876	3193	4069	0.199151	0	0	2777	1036	3813	0.174034	0	0	1632	4006	5638	0.123684	0	0	0	0
18S_rRNA_M_Locati	702	G	1107	3581	4688	0.352788	0	0	2385	1457	3842	0.242247	0	0	1788	2136	3924	0.207884	0	0.172142	0.0573807	0.0811486
18S_rRNA_M_Locati	703	U	1045	2166	3211	0.0437318	0	0	2588	1306	3894	0.260282	0	0	1927	3419	5346	0.188554	0	0	0	0
18S_rRNA_M_Locati	704	U	1028	2246	3274	0.117069	0	0	2316	1110	3426	0.166696	0	0	1548	3392	4940	0.195905	0	0	0	0
18S_rRNA_M_Locati	705	G	590	1012	1602	0.77861	0.194467	0.437917	975	1132	2107	0.335331	0.0278902	0.251211	761	1331	2092	0.699708	0.13953	0.411779	0.366969	0.0825457
18S_rRNA_M_Locati	706	C	949	1291	2240	0.147826	0	0.128838	1082	971	2053	0.304842	0	0.233711	773	2278	3051	0.045533	0	0.0435637	0.135371	0.0777645
18S_rRNA_M_Locati	707	U	1315	1098	2413	0.00360398	0	0	1723	716	2439	0.0510337	0	0.0485747	923	1854	2777	0.0905848	0	0.0830881	0.0438876	0.0340821
18S_rRNA_M_Locati	708	G	554	646	1200	0.890388	0.100049	0.471216	533	550	1083	1.28658	0.202016	0.562893	441	1183	1624	0.698626	0.0371501	0.411438	0.481849	0.0622869
18S_rRNA_M_Locati	709	C	924	1260	2184	0.111609	0	0	1665	1303	2968	0.292946	0	0	705	2378	3083	0.240582	0	0	0	0
18S_rRNA_M_Locati	710	A	1168	999	2167	0.154782	0	0	1368	1258	2626	0.240693	0	0	860	1017	1877	0.176991	0	0.150444	0.0501479	0.0709199
18S_rRNA_M_Locati	711	G	878	877	1755	0.0094976	0	0.00941355	826	741	1567	0.275942	0	0.216374	704	1155	1859	0.0766249	0	0.0712069	0.0989981	0.0867463
18S_rRNA_M_Locati	712	U	941	789	1730	0.00329289	0	0.00328398	1072	810	1882	0.0211896	0	0.0207607	753	1045	1798	0.123562	0	0.110028	0.044691	0.0467481
18S_rRNA_M_Locati	713	U	960	1194	2154	0.245656	0	0	2002	724	2726	0.345871	0	0	864	1488	2352	0.198758	0	0	0	0
18S_rRNA_M_Locati	714	A	127	92	219	7.33061	0.744742	0.880441	159	107	266	6.74395	0.706958	0.871288	104	56	160	12.2265	0.82204	0.924829	0.892186	0.0233823
18S_rRNA_M_Locati	715	A	975	698	1673	0.0234037	0	0.0228818	1345	408	1753	0.136475	0	0.120147	828	518	1346	0.531354	0.0577827	0.347151	0.163393	0.135868
18S_rRNA_M_Locati	716	A	1270	590	1860	0.0547137	0	0	1630	281	1911	0.082729	0	0.0764447	1163	795	1958	0.0607396	0	0.0572891	0.044578	0.032477
18S_rRNA_M_Locati	717	A	1315	460	1775	0.00771396	0	0	1634	204	1838	0.141085	0	0.1237	1226	939	2165	0.0304966	0	0	0.0412334	0.0583128
18S_rRNA_M_Locati	718	A	1138	271	1409	0.305288	0	0.234012	1605	267	1872	0.182524	0	0.154421	1674	1520	3194	0.339423	0	0	0.129478	0.0971496
18S_rRNA_M_Locati	719	G	1512	133	1645	0.144478	0	0.126306	1565	281	1846	0.26728	0	0.210999	1579	612	2191	0.0566099	0	0.0536001	0.130302	0.0643198
18S_rRNA_M_Locati	720	C	1898	508	2406	0.265014	0	0	2526	283	2809	0.182202	0	0	2252	413	2665	0.162049	0	0	0	0
18S_rRNA_M_Locati	721	U	1706	429	2135	0.1308	0	0	2581	438	3019	0.218127	0	0	2105	449	2554	0.0962861	0	0	0	0
18S_rRNA_M_Locati	722	C	2325	792	3117	0.443179	0	0	3477	726	4203	0.468258	0	0	2784	853	3637	0.394112	0	0	0	0
18S_rRNA_M_Locati	723	G	996	421	1417	0.344546	0	0.256389	1096	782	1878	0.355833	0	0.262549	845	496	1341	0.879268	0.132379	0.468064	0.329001	0.0983644
18S_rRNA_M_Locati	724	U	1004	809	1813	0.00124954	0	0	2299	388	2687	0.0593543	0	0	1759	1394	3153	0.26289	0	0	0	0
18S_rRNA_M_Locati	725	A	1689	652	2341	0.270343	0	0	2479	395	2874	0.104112	0	0	1457	961	2418	0.0405861	0	0	0	0
18S_rRNA_M_Locati	726	G	499	335	834	1.18652	0.2665	0.54295	580	1900	2480	0.0914371	0	0.0838078	412	554	966	1.53864	0.281155	0.606336	0.411031	0.232824
18S_rRNA_M_Locati	727	U	760	260	1020	0.694102	0.124672	0.409954	621	223	844	2.43982	0.460966	0.709531	541	615	1156	1.07693	0.172502	0.518737	0.546074	0.12382
18S_rRNA_M_Locati	728	U	829	974	1803	0.130155	0	0	1139	620	1759	0.568106	0.0449071	0.362419	1084	1170	2254	0.00113328	0	0	0.120806	0.170846
18S_rRNA_M_Locati	729	G	662	1177	1839	0.186812	0	0	1051	1977	3028	0.101963	0	0	932	2718	3650	0.44495	0	0	0	0
18S_rRNA_M_Locati	730	G	512	923	1435	0.089152	0	0.0819068	653	3011	3664	0.247894	0	0	556	2444	3000	0.262338	0	0	0.0273023	0.0386113
18S_rRNA_M_Locati	731	A	278	1093	1371	0.139958	0	0.122853	435	3057	3492	0.189299	0	0	681	1243	1924	0.22576	0	0.184258	0.10237	0.0766047
18S_rRNA_M_Locati	732	U	382	1037	1419	0.0879343	0	0.0808792	444	3355	3799	0.273512	0	0	514	1459	1973	0.205888	0	0.170807	0.0838954	0.0697643
18S_rRNA_M_Locati	733	C	410	1230	1640	0.031363	0	0	332	2567	2899	0.0343716	0	0	579	1593	2172	0.102915	0	0.0933504	0.0311168	0.0440058
18S_rRNA_M_Locati	734	U	382	794	1176	0.431728	0.127742	0.301723	370	1285	1655	0.763433	0.0168993	0.433072	719	1080	1799	0.352556	0	0.260766	0.331854	0.0734996
18S_rRNA_M_Locati	735	C	336	1617	1953	0.165529	0	0	406	4671	5077	0.511288	0	0	757	1238	1995	0.181892	0	0.153964	0.0513213	0.0725793
18S_rRNA_M_Locati	736	G	471	1408	1879	0.116862	0	0	671	1877	2548	0.0537858	0	0.0510596	857	2571	3428	0.399961	0	0	0.0170199	0.0240697
18S_rRNA_M_Locati	737	G	461	1178	1639	0.0348645	0	0.0337098	593	2107	2700	0.0509647	0	0	1170	2272	3442	0.432517	0	0	0.0112366	0.0158909
18S_rRNA_M_Locati	738	G	715	1106	1821	0.0893768	0	0	631	956	1587	0.586874	0.00792948	0.369977	1016	1513	2529	0.227413	0	0	0.123326	0.174409
18S_rRNA_M_Locati	739	G	1049	831	1880	0.128354	0	0	583	655	1238	0.929863	0.0733822	0.48203	814	600	1414	0.394229	0.0307172	0.282901	0.254977	0.197776
18S_rRNA_M_Locati	740	A	1006	546	1552	0.108915	0	0.0982744	443	590	1033	1.32264	0.16917	0.569693	599	493	1092	0.76935	0.120433	0.435046	0.367671	0.198265
18S_rRNA_M_Locati	741	C	1241	920	2161	0.223625	0	0	1199	1065	2264	0.026132	0	0.0254774	1079	370	1449	0.289785	0	0.224797	0.083425	0.100505
18S_rRNA_M_Locati	742	C	574	1250	1824	0.0998295	0	0	824	2163	2987	0.294734	0	0	835	442	1277	0.400443	0	0.2861	0.0953668	0.134869
18S_rRNA_M_Locati	743	G	716	567	1283	0.300121	0	0.230979	1572	1749	3321	0.365172	0	0	1112	470	1582	0.0160314	0	0.0157883	0.0822559	0.105361
18S_rRNA_M_Locati	744	G	443	481	924	0.817586	0.147184	0.450087	570	942	1512	0.536454	0.0127947	0.349301	564	459	1023	0.514236	0.00764655	0.33982	0.379736	0.0498961
18S_rRNA_M_Locati	745	G	747	546	1293	0.276996	0	0.217044	1084	450	1534	0.60241	0.058623	0.376093	914	439	1353	0.162843	0	0.140127	0.244421	0.0982585
18S_rRNA_M_Locati	746	C	1668	999	2667	0.433504	0	0	2246	822	3068	0.220586	0	0	1610	519	2129	0.235196	0	0	0	0
18S_rRNA_M_Locati	747	C	705	1140	1845	0.12274	0	0	1527	1342	2869	0.145803	0	0	1407	1048	2455	0.313287	0	0	0	0
18S_rRNA_M_Locati	748	G	179	609	788	1.12898	0.188138	0.530608	566	1414	1980	0.254585	0	0.203006	431	445	876	1.22777	0.177985	0.551403	0.428339	0.159561
18S_rRNA_M_Locati	749	C	48	1534	1582	0.0189584	0	0	315	2501	2816	0.192884	0	0	278	913	1191	0.660598	0.0271601	0.398009	0.13267	0.187623
18S_rRNA_M_Locati	750	G	463	885	1348	0.147278	0	0.128455	784	1550	2334	0.0718059	0	0	657	578	1235	0.62082	0	0.38322	0.170558	0.159256
18S_rRNA_M_Locati	751	C	290	1844	2134	0.330075	0	0	666	2951	3617	0.464354	0	0	513	2892	3405	0.482609	0	0	0	0
18S_rRNA_M_Locati	752	G	1064	1035	2099	0.321931	0	0	737	1851	2588	0.23847	0	0	838	2562	3400	0.494792	0	0	0	0
18S_rRNA_M_Locati	753	G	733	1026	1759	0.192746	0	0	322	1041	1363	0.43449	0.0507576	0.303043	513	1582	2095	0.166274	0	0	0.101014	0.142856
18S_rRNA_M_Locati	754	U	418	529	947	0.516854	0	0.340978	274	761	1035	0.735124	0.0908054	0.423908	324	1984	2308	0.329565	0	0	0.254962	0.183437
18S_rRNA_M_Locati	755	C	209	866	1075	0.352365	0	0.260734	224	898	1122	0.516889	0	0.340956	178	1411	1589	0.041153	0	0	0.200563	0.145552
18S_rRNA_M_Locati	756	C	135	485	620	1.45028	0.247733	0.592272	176	515	691	1.39629	0.212336	0.58304	114	994	1108	0.307725	0	0.235475	0.470263	0.166062
18S_rRNA_M_Locati	757	G	195	523	718	1.07874	0.134527	0.519286	181	862	1043	0.502746	0	0.334765	87	437	524	1.63484	0.307333	0.620919	0.491656	0.118444
18S_rRNA_M_Locati	758	C	338	1393	1731	0.224634	0	0	264	1380	1644	0.156008	0	0	116	487	603	0.959364	0.0736545	0.490044	0.163348	0.231009
18S_rRNA_M_Locati	759	C	657	1794	2451	0.507463	0	0	598	1367	1965	0.353572	0	0	286	366	652	0.491492	0	0.329869	0.109956	0.155502
18S_rRNA_M_Locati	760	G	318	484	802	0.754144	0	0.430227	238	486	724	1.01785	0.144324	0.504769	97	320	417	1.21608	0.109646	0.549346	0.494781	0.0491405
18S_rRNA_M_Locati	761	C	650	1223	1873	0.315742	0	0	448	1342	1790	0.252863	0	0	188	432	620	0.341063	0	0.254629	0.0848762	0.120033
18S_rRNA_M_Locati	762	G	581	1430	2011	0.380633	0	0	433	1461	1894	0.302287	0	0	258	559	817	0.0293127	0	0.0285118	0.00950393	0.0134406
18S_rRNA_M_Locati	763	A	359	528	887	0.50528	0	0.335923	276	1495	1771	0.259368	0	0	159	640	799	0.107889	0	0.0974924	0.144472	0.141106
18S_rRNA_M_Locati	764	G	416	709	1125	0.118176	0	0.105771	351	950	1301	0.00372931	0	0.00371829	225	1180	1405	0.378932	0	0	0.0364964	0.0490079
18S_rRNA_M_Locati	765	G	127	662	789	0.529128	0	0.346319	70	600	670	0.950753	0.104973	0.48775	75	365	440	1.35498	0.228108	0.575922	0.469997	0.0945717
18S_rRNA_M_Locati	766	C	214	1544	1758	0.454513	0	0	158	1802	1960	0.459833	0	0	112	1066	1178	0.163557	0	0	0	0
18S_rRNA_M_Locati	767	G	161	660	821	0.239321	0	0.193297	89	605	694	0.683709	0.114878	0.40642	81	917	998	0.0396953	0	0.0382165	0.212645	0.15094
18S_rRNA_M_Locati	768	A	110	779	889	0.0486267	0	0.0464215	53	924	977	0.0841286	0	0.0776735	86	1759	1845	0.465264	0	0	0.041365	0.031911
18S_rRNA_M_Locati	769	G	30	410	440	0.982464	0.134518	0.496145	19	563	582	0.746636	0.0972151	0.427891	12	1248	1260	0.179214	0	0	0.308012	0.219573
18S_rRNA_M_Locati	770	C	54	577	631	0.303463	0	0.233096	23	607	630	0.502272	0.0135763	0.334694	16	962	978	0.0799228	0	0.074078	0.213956	0.107254
18S_rRNA_M_Locati	771	C	137	700	837	0.0675418	0	0	127	953	1080	0.191428	0	0	64	994	1058	0.0316441	0	0	0	0
18S_rRNA_M_Locati	772	A	58	474	532	0.539942	0	0.351052	90	664	754	0.230464	0	0.1875	42	727	769	0.39482	0.0110844	0.283325	0.273959	0.0670976
18S_rRNA_M_Locati	773	C	36	629	665	0.119119	0	0.106583	136	733	869	0.0117369	0	0	63	573	636	0.669091	0.0948156	0.401249	0.169277	0.169702
18S_rRNA_M_Locati	774	C	84	1080	1164	0.415765	0	0	96	1018	1114	0.231241	0	0	100	1274	1374	0.292226	0	0	0	0
18S_rRNA_M_Locati	775	G	39	322	361	1.13557	0.192165	0.532431	92	646	738	0.23816	0.00123135	0.19256	48	462	510	0.99426	0.228078	0.49905	0.408014	0.152957
18S_rRNA_M_Locati	776	C	97	628	725	0.0247934	0	0.0242261	140	670	810	0.165735	0	0.142323	94	845	939	0.000130024	0	0	0.0555163	0.0621731
18S_rRNA_M_Locati	777	C	55	969	1024	0.29794	0	0	89	902	991	0.0173723	0	0	112	1180	1292	0.297972	0	0	0	0
18S_rRNA_M_Locati	778	G	38	970	1008	0.289043	0	0	72	999	1071	0.0904954	0	0	51	986	1037	0.103639	0	0	0	0
18S_rRNA_M_Locati	779	G	19	514	533	0.430649	0.0224992	0.301411	41	751	792	0.292686	0.0435018	0.226638	24	891	915	0.0238113	0	0.0232823	0.183777	0.117521
18S_rRNA_M_Locati	780	U	10	580	590	0.24358	0	0.196137	19	1042	1061	0.0674827	0	0	14	1083	1097	0.182908	0	0	0.0653789	0.0924597
18S_rRNA_M_Locati	781	C	22	770	792	0.152375	0	0	28	1076	1104	0.117225	0	0	11	816	827	0.0427134	0	0.0410112	0.0136704	0.0193329
18S_rRNA_M_Locati	782	C	39	582	621	0.113791	0	0.102313	39	1120	1159	0.171188	0	0	26	596	622	0.376083	0.00186996	0.273619	0.125311	0.112882
18S_rRNA_M_Locati	783	C	28	765	793	0.176686	0	0	50	1344	1394	0.353007	0	0	58	1017	1075	0.308313	0	0	0	0
18S_rRNA_M_Locati	784	G	24	764	788	0.213026	0	0	56	943	999	0.103544	0	0	37	858	895	0.236248	0	0	0	0
18S_rRNA_M_Locati	785	G	14	478	492	0.263489	0.0392202	0.208876	26	833	859	0.0156848	0	0	7	698	705	0.0949953	0	0	0.0696253	0.0984651
18S_rRNA_M_Locati	786	A	12	404	416	0.470424	0.0968459	0.320447	15	608	623	0.313871	0.0288915	0.239182	1	473	474	0.265965	0.0237143	0.210439	0.256689	0.0465854
18S_rRNA_M_Locati	787	C	13	533	546	0.0654479	0	0.0615332	16	790	806	0.0999862	0	0	3	407	410	0.323547	0.0292616	0.244905	0.102146	0.104024
18S_rRNA_M_Locati	788	C	18	541	559	0.0214286	0	0	19	585	604	0.108466	0	0.0979989	7	328	335	0.469775	0.0266587	0.320272	0.139424	0.133992
18S_rRNA_M_Locati	789	C	59	536	595	0.109265	0	0	57	389	446	0.36428	0.0159408	0.267451	54	226	280	0.633689	0.0497874	0.388735	0.218729	0.162397
18S_rRNA_M_Locati	790	C	157	454	611	0.164397	0	0	172	289	461	0.13278	0	0.117441	142	170	312	0.290664	0	0.225764	0.114401	0.0921927
18S_rRNA_M_Locati	791	C	179	393	572	0.120147	0	0	215	191	406	0.184575	0	0.15614	226	159	385	0.05711	0	0	0.0520465	0.0736049
18S_rRNA_M_Locati	792	A	154	192	346	0.525552	0.122333	0.345152	271	168	439	0.00972222	0	0.00965033	229	106	335	0.0430556	0	0.0413964	0.132066	0.151231
18S_rRNA_M_Locati	793	G	95	369	464	0.120024	0	0.107368	136	239	375	0.160165	0	0.138371	155	277	432	0.234616	0	0	0.0819131	0.0592881
18S_rRNA_M_Locati	794	G	36	260	296	0.857089	0.236442	0.462361	37	242	279	0.565556	0.114615	0.362075	36	144	180	1.02603	0.257055	0.507808	0.444082	0.0608832
18S_rRNA_M_Locati	795	C	69	465	534	0.0356179	0	0	59	234	293	0.474036	0.0957127	0.322334	47	222	269	0.335473	0.0384671	0.2519	0.191412	0.138369
18S_rRNA_M_Locati	796	C	114	478	592	0.170096	0	0	58	229	287	0.495486	0.0675628	0.332092	147	244	391	0.110714	0	0	0.110697	0.15655
18S_rRNA_M_Locati	797	U	62	593	655	0.291701	0	0	61	419	480	0.128113	0	0	158	282	440	0.198665	0	0	0	0
18S_rRNA_M_Locati	798	C	72	459	531	0.150209	0	0	119	370	489	0.155692	0	0	238	144	382	0.080969	0	0	0	0
18S_rRNA_M_Locati	799	C	304	249	553	0.220176	0	0	204	325	529	0.241971	0	0	239	98	337	0.0449047	0	0.0430969	0.0143656	0.0203161
18S_rRNA_M_Locati	800	C	476	251	727	0.471886	0	0	435	273	708	0.467372	0	0	361	146	507	0.354243	0	0	0	0
18S_rRNA_M_Locati	801	G	200	100	300	0.379181	0.0724378	0.275596	327	142	469	0.139173	0	0	292	48	340	0.0518084	0	0.0493942	0.10833	0.119981
18S_rRNA_M_Locati	802	G	103	84	187	1.08723	0.238647	0.522228	177	66	243	0.727914	0.0918546	0.422269	189	47	236	0.56601	0.110311	0.362411	0.435636	0.065926
18S_rRNA_M_Locati	803	C	145	80	225	0.666421	0.00163859	0.400976	376	138	514	0.203193	0	0	379	77	456	0.223851	0	0	0.133659	0.189022
18S_rRNA_M_Locati	804	G	90	56	146	1.53039	0.205772	0.606434	113	51	164	1.78808	0.294331	0.642727	136	54	190	1.12589	0.209974	0.530916	0.593359	0.0465738
18S_rRNA_M_Locati	805	C	154	66	220	0.628658	0	0.387073	133	94	227	0.948441	0.0700371	0.487867	199	64	263	0.517761	0.0108593	0.341988	0.405643	0.0609853
18S_rRNA_M_Locati	806	C	215	47	262	0.312379	0	0.238716	234	107	341	0.227778	0	0.185963	269	86	355	0.0921036	0	0.0845535	0.169744	0.0639731
18S_rRNA_M_Locati	807	C	341	18	359	0.101821	0	0	286	118	404	0.0376406	0	0	404	57	461	0.210798	0	0	0	0
18S_rRNA_M_Locati	808	C	233	35	268	0.384056	0	0.278233	269	47	316	0.365124	0	0.268086	306	46	352	0.175449	0	0.149622	0.23198	0.0583835
18S_rRNA_M_Locati	809	C	619	67	686	0.503057	0	0	851	20	871	0.562487	0	0	568	44	612	0.357042	0	0	0	0
18S_rRNA_M_Locati	810	C	463	51	514	0.266753	0	0	707	23	730	0.470482	0	0	749	35	784	0.532965	0	0	0	0
18S_rRNA_M_Locati	811	G	428	15	443	0.0898649	0	0	263	28	291	0.513166	0	0.339903	249	45	294	0.431111	0	0.301957	0.213954	0.152079
18S_rRNA_M_Locati	812	G	213	21	234	0.913144	0.0890518	0.478364	181	35	216	1.13804	0	0.533433	127	25	152	1.86739	0.16968	0.652739	0.554845	0.0727806
18S_rRNA_M_Locati	813	A	300	15	315	0.439733	0	0.306099	107	23	130	2.71841	0.318202	0.732571	121	21	142	2.05128	0.189219	0.673813	0.570828	0.188722
18S_rRNA_M_Locati	814	U	717	52	769	0.460563	0	0	806	111	917	0.53435	0	0	901	30	931	0.633262	0	0	0	0
18S_rRNA_M_Locati	815	G	226	28	254	0.971155	0.172805	0.493665	213	91	304	0.800838	0	0.445514	220	46	266	0.627466	0	0.386437	0.441872	0.0438514
18S_rRNA_M_Locati	816	C	339	42	381	0.320332	0	0.243096	222	29	251	1.43289	0.0968986	0.589929	242	30	272	0.681766	0	0.406272	0.413099	0.141676
18S_rRNA_M_Locati	817	C	422	27	449	0.240173	0	0.194008	302	38	340	0.956729	0.0667768	0.489677	238	28	266	0.820058	0	0.451496	0.378394	0.131309
18S_rRNA_M_Locati	818	C	586	19	605	0.00262193	0	0.00261938	581	38	619	0.230753	0	0.187735	397	17	414	0.308327	0	0.2361	0.142151	0.10062
18S_rRNA_M_Locati	819	U	470	13	483	0.335744	0	0.251743	583	39	622	0.331978	0	0.249537	341	22	363	0.611264	0	0.380017	0.293766	0.0609955
18S_rRNA_M_Locati	820	U	511	38	549	0.178061	0	0.151381	922	40	962	0.123595	0	0	427	33	460	0.304845	0	0.234014	0.128465	0.0969003
18S_rRNA_M_Locati	821	G	738	16	754	0.181648	0	0	1131	40	1171	0.280385	0	0	688	45	733	0.231305	0	0	0	0
18S_rRNA_M_Locati	822	A	847	11	858	0.279783	0	0	1608	20	1628	0.492074	0	0	1056	24	1080	0.491099	0	0	0	0
18S_rRNA_M_Locati	823	C	1320	50	1370	0.597763	0	0	1200	54	1254	0.290739	0	0	993	9	1002	0.431483	0	0	0	0
18S_rRNA_M_Locati	824	U	1189	45	1234	0.565146	0	0	1649	161	1810	0.542947	0	0	1203	38	1241	0.565396	0	0	0	0
18S_rRNA_M_Locati	825	G	115	56	171	2.54406	0.367969	0.719017	358	89	447	1.17123	0.18011	0.539987	214	92	306	1.06069	0.115045	0.515542	0.591515	0.0907081
18S_rRNA_M_Locati	826	G	15	72	87	5.69066	0.596829	0.851985	73	216	289	2.50103	0.379312	0.715074	9	155	164	3.0231	0.408165	0.752569	0.773209	0.0577676
18S_rRNA_M_Locati	827	G	190	138	328	0.657818	0	0.397526	425	241	666	0.576845	0	0.36617	251	112	363	0.90812	0	0.47661	0.413436	0.046469
18S_rRNA_M_Locati	828	U	35	297	332	0.651051	0	0.395044	310	286	596	1.25479	0	0.556914	47	399	446	0.865399	0	0.464479	0.472145	0.0663052
18S_rRNA_M_Locati	829	G	120	213	333	0.691983	0	0.409702	472	141	613	1.63091	0	0.620287	172	249	421	1.3262	0	0.570695	0.533562	0.0898913
18S_rRNA_M_Locati	830	U	165	152	317	0.754158	0	0.430698	634	173	807	1.27512	0.0400175	0.560769	215	251	466	1.35232	0.0726163	0.575412	0.522293	0.0650425
18S_rRNA_M_Locati	831	C	237	71	308	0.847105	0.151474	0.459417	790	246	1036	1.14074	0.152059	0.533111	400	171	571	1.23256	0.205768	0.552516	0.515015	0.0401035
18S_rRNA_M_Locati	832	C	513	57	570	0.0793345	0	0.0736226	1659	35	1694	0.578315	0.0633271	0.36655	979	111	1090	0.351176	0.0109608	0.260081	0.233418	0.121064
18S_rRNA_M_Locati	833	U	553	203	756	0.118186	0	0	2631	54	2685	0.138372	0	0.121592	1403	282	1685	0.0135824	0	0	0.0405307	0.0573191
18S_rRNA_M_Locati	834	C	764	364	1128	0.405629	0	0	5866	182	6048	0.508747	0	0	2957	361	3318	0.497472	0	0	0	0
18S_rRNA_M_Locati	835	G	821	337	1158	0.397977	0	0	4734	214	4948	0.335675	0	0	2494	386	2880	0.358664	0	0	0	0
18S_rRNA_M_Locati	836	G	458	395	853	0.113778	0	0	2863	271	3134	0.16958	0	0.145032	1296	495	1791	0.151997	0	0.132006	0.0923459	0.0655146
18S_rRNA_M_Locati	837	C	634	172	806	0.0636514	0	0	5129	829	5958	0.437995	0	0	2228	623	2851	0.312572	0	0	0	0
18S_rRNA_M_Locati	838	U	613	241	854	0.0991163	0	0	5762	236	5998	0.459167	0	0	2392	367	2759	0.293225	0	0	0	0
18S_rRNA_M_Locati	839	U	427	318	745	0.0686327	0	0.0643055	3702	979	4681	0.323969	0	0	2266	223	2489	0.240562	0	0	0.0214352	0.0303139
18S_rRNA_M_Locati	840	G	300	324	624	0.456196	0	0.313624	1313	535	1848	0.725203	0.125615	0.42049	1297	463	1760	0.0667739	0	0.0626276	0.26558	0.149994
18S_rRNA_M_Locati	841	G	368	185	553	0.762495	0.0206352	0.433066	843	287	1130	1.49151	0.237241	0.59885	1085	238	1323	0.337521	0.00698047	0.252491	0.428136	0.141443
18S_rRNA_M_Locati	842	G	564	122	686	0.446369	0	0.308924	2192	144	2336	0.0218656	0	0	1211	122	1333	0.199642	0	0.166522	0.158482	0.126246
18S_rRNA_M_Locati	843	G	218	75	293	2.83375	0.456253	0.739815	711	110	821	1.71138	0.213204	0.631468	461	232	693	1.33248	0.24785	0.571626	0.647636	0.0696083
18S_rRNA_M_Locati	844	C	644	336	980	0.207407	0	0.171924	625	148	773	1.55365	0.0763339	0.608711	694	149	843	0.862625	0.091445	0.463418	0.414684	0.181617
18S_rRNA_M_Locati	845	C	560	590	1150	0.259735	0	0.206325	545	261	806	1.46386	0	0.594431	519	271	790	1.27564	0.0189849	0.560875	0.453877	0.175581
18S_rRNA_M_Locati	846	C	1833	941	2774	0.464541	0	0	1136	372	1508	0.341057	0	0.254445	1123	604	1727	0.0961098	0	0.087729	0.114058	0.105532
18S_rRNA_M_Locati	847	G	1386	500	1886	0.122475	0	0	1256	355	1611	0.273863	0	0.215091	1441	541	1982	0.0406119	0	0	0.0716969	0.101395
18S_rRNA_M_Locati	848	G	832	262	1094	0.720487	0	0.418992	801	203	1004	1.38014	0.025953	0.5801	650	303	953	1.26904	0	0.559544	0.519545	0.0715956
18S_rRNA_M_Locati	849	A	1316	293	1609	0.191484	0	0.160794	1468	390	1858	0.320889	0	0.243033	1235	585	1820	0.202288	0	0.168329	0.190719	0.0371195
18S_rRNA_M_Locati	850	G	1890	312	2202	0.110344	0	0	2872	291	3163	0.204225	0	0	2277	512	2789	0.206316	0	0	0	0
18S_rRNA_M_Locati	851	C	4126	514	4640	0.622349	0	0	5476	1135	6611	0.644428	0	0	5641	781	6422	0.700991	0	0	0	0
18S_rRNA_M_Locati	852	G	2585	396	2981	0.336735	0	0	3968	1285	5253	0.480457	0	0	3698	755	4453	0.495078	0	0	0	0
18S_rRNA_M_Locati	853	U	88	47	135	15.3409	0.823718	0.939227	120	66	186	17.4465	0.816773	0.946063	113	17	130	19.9479	0.830124	0.95261	0.945967	0.00546406
[truncated: 5,515 more rows]

## Sheet: 12 somite
Data_handling_v3			CTAACT_zbf_12 somite_1_M						GTAGTG_zbf_12 somite_2_M						TACTGT_zbf_12 somite_3_M						Average
[truncated: 6,369 more rows]

[truncated: 2 more sheets: Protruding mouth, Adult tail]
