# Supplementary material
Source: HighWire-hosted journal article supplement (doi:10.1101/rna.076760.120)
Supplement: Supplemental_Data_4.xlsx [file Supplemental_Data_4.xlsx]

## Sheet: Minimum list of SNORDs
Nucleotide		Box D/D'			Box C/C'		Genomic informations					SNORD(3'-5')																			rRNA(5'-3')
Human #	SNORD	Usage	D	D'	C	C'	Chr	Location	Type	Strand	Host gene	1	2	3	4	5	6	7	8	9	10	11	12	13	14	15	16	17	18	19	1	2	3	4	5	6	7	8	9	10	11	12	13	14	15	16	17	18	19
SSU_27	SNORD27	D'	CUGA	CUGA	AUGAUGA	GUGAUGU	7	25044474-25044542	intronic	pos	AL954715.1	U	A	U	A	U	A	C	G	A	A	C	A	G							A	U	A	U	A	U	G	C	U	U	G	U	C
SSU_99	SNORD57	D	CUGA	CUGA	GUGAUGA	CUGCGUG	21	11961236-11961305	intronic	rev	nop56	C	G	A	G	U	A	A	U	U	U	A	G	U	C	A	A				G	C	U	C	A	U	U	A	A	A	U	C	A	G	U	U
SSU_116	SNORD42	D	CUGA	CUGA	AUGAUGU	AUGUGAU	21	26074168-26074227	intronic	pos	rpl23a	A	C	C	A	A	G	G	A	A	A	C	U								U	G	G	U	U	C	C	U	U	U	G	A
SSU_121	SNORD4	D'	CUGA	AUGA	AUGAUGG	AUGUGAU	21	26073364-26073434	intronic	pos	rpl23a	C	G	A	A	A	C	U	A	G	C	G										C	U	U	U	G	A	U	C	G	C
SSU_166	SNORD44	D	CUGA	CUGA	GUGAUGA	AUGGAUG	8	16610676-16610746	intronic	rev	gas5	U	G	U	C	U	C	G	A	U	U	A	U									C	A	G	A	G	C	U	A	A	U	A
SSU_172	SNORD45	D	CUGA	CUGA	AUGAUGA	GUGAAGU	9	18909362-18909434	intronic	rev	si:dkey-239h2.3	C	A	U	U	A	U	G	U	A	C	G										U	A	A	U	A	C	A	U	G	C
SSU_286	NET1	D	CUGA	AUGA	AGGAUGA	AUGGCAU	7	25044931-25045013	intronic	pos	AL954715.1	A	C	G	A	A	A	C	C	A	C	U	G	A	A						C	G	C	U	U	U	G	G	U	G	A	C	U	C	U
SSU_287	NET1 (+6 modifcation)
SSU_346	SNORD200	D'	CUGA	CUGA	AUGAUGA	CUGUGUG	3	18829144-18829221	intronic	pos	tnpo2	C	U	A	A	G	C	U	U	A	C	A	G	A	C							A	U	U	C	G	A	A	U	G	U	C	U	G
SSU_354	SNORD90	D'	CUGA	CUGA	AUGAUGA	GUGGGGG	10	9642505-9642575	intronic	pos	rc3h2	U	U	A	G	A	C	G	G	G	A	U	A									G	U	C	U	G	C	C	C	U	A	U
SSU_428	SNORD68	D'	CUGA	CUGC	AUGAUGA	UUGAUGA	7	67473386-67473457	intronic	pos	rpl13	U	C	U	A	A	G	G	C	C	U	C	U									G	A	U	U	C	C	G	G	A	G	A
SSU_436	SNORD100	D'	CUGA	CUGA	GUGAUGA	CUGAGGA	23	31433582-31433659	intronic	pos	rps12	A	U	C	U	C	C	C	U	C	G	G										A	G	A	G	G	G	A	G	C	C
SSU_462	SNORD14	D	CUGA	CAGA	AUGAUGA	AUGGUCC	10	29851001-29851093	intronic	pos	hspa8	U	G	U	A	G	G	U	U	C	C	U	U	C	C						A	C	A	U	C	C	A	A	G	G	A	A	G	G
SSU_468	SNORD83	D	CUGA	AUGA	AUGAUGA	AUGAGGA	3	29868640-29868726	intronic	rev	rpl3	U	U	C	C	U	U	C	C	G	U	C	G	U							A	A	G	G	A	A	G	G	C	A	G	C	A
SSU_484	SNORD16	D'	CUGA	CCUA	AUGAUGG	GUGACAG	18	19455182-19455241	intronic	rev	rpl4	U	G	C	G	U	U	U	A	A	U	G									G	C	G	C	A	A	A	U	U	A	C
SSU_509	SNORD11	D	CUGA	CUGA	GUGAUGA	AUGUGGG	6	9668281-9668357	intronic	rev	nop58	U	U	C	U	C	C	A	U	C	A	C	U	G	U	U	U	U	U	U		A	G	A	G	G	U	A	G	U	G	A	C	G	A	A	A	A	A
SSU_512	SNORD70	D	CUGA	CUGU	AUGAUGU	ACCAUGA	6	9673040-9673113	intronic	rev	nop58	A	C	C	A	U	C	A	C	U	G	C	U	U	A	U	U					G	G	U	A	G	U	G	A	C	G	A	A	A	A	A
SSU_517	SNORD56	D'	CUGA	CAGU	GUGAUGC	UUGUUGA		11962781-11962845	intronic	rev	nop56	A	A	C	U	G	C	U	U	U	U	U	A	A							G	U	G	A	C	G	A	A	A	A	A	U	A
SSU_601	SNORD103	D'	CUGA	CUGA	GUGAUGA	AUGACAA	19	16028181-16028238	intronic	rev	ctps1a	U	C	U	C	C	C	G	U	U	C	A	A	A	C							G	A	G	G	G	C	A	A	G	U	C	U	G
SSU_627	SNORD65	D'	CUGA	CAGA	AUGAUGA	GUGGUGA	21	40400937-40401012	intronic	pos	CR847523.1	U	G	C	C	A	U	U	A	A	G	G	U	C	G	A						C	G	G	U	A	A	U	U	C	C	A	G	C	U
SSU_644	SNORD54	D	CUGA	AUGA	AUGAGGA	AUGAGUC	7	58748944-58749015	intronic	pos	rps20	U	U	A	U	C	G	C	A	U	A	C	U	A	U						A	A	U	A	G	C	G	U	A	U	G	C	U	A
SSU_668	SNORD36	D	CUGA	CUGA	AUGAUGU	GUGGUUU	5	33284557-33284626	intronic	rev	rpl7a	C	C	A	A	U	U	U	U	U	C	G	A	G								G	U	U	A	A	A	A	A	G	C	U	C
SSU_799	SNORD105	D	CUGA	AUGG	AUGAUGA	GUGAUUC	3	54561171-54561236	intronic	pos	ppan	A	C	G	C	A	A	A	U	G	A	A	A	C	U	U	U	U				G	C	G	U	U	U	A	C	U	U	U	G	A	A	A
SSU_1031	SNORD59A	D'	CUGA	CUGA	AUGAUGA	CUGAUGA	23	17873528-17873598	intronic	pos	naca	U	U	C	U	U	G	C	U	U	U	C	A	G							A	A	G	A	A	C	G	A	A	A	G	U	C
SSU_1031	SNORD59B	D'	CUGA	CUGA	AUGAUGA	CUGAGUU	23	17874073-17874147	intronic	pos	naca	U	U	C	U	U	G	C	U	U	U	C	A	G	U	U	U	U	C	A	A	A	G	A	A	C	G	A	A	A	G	U	C	G	G	A	G	G
SSU_1272	SNORD66	D'	CUGA	CUGA	CUGAUGA	CUGAUGG	2	16829690-16829761	intronic	pos	eif4g1a	A	C	C	G	G	G	U	C	U	G	U	G	C								G	G	C	C	C	G	G	A	C	A	C	G
SSU_1288	SNORD110	D'	CUGA	CUGA	GUGAUGC	GUGAUGA	21	11967960-11968029	intronic	rev	nop56	A	C	C	U	A	A	C	U	G	U	C	U	A	A							G	G	A	U	U	G	A	C	A	G	A	U	U
SSU_1326	SNORD33	D	CUGA	CUAA	GUGAUGU	AUGAGUG	17	24617466-24617538	intronic	pos	rpl13a	G	A	C	C	A	U	C	A	C	G	U	A	C								U	G	G	U	G	G	U	G	C	A	U	G
SSU_1328	SNORD32	D'	CUGA	CUGA	GUGAGGA	AUGAUGA	2	57157724-57157790	intronic	pos	eef2b	U	C	A	C	C	A	C	G	U	A	C										G	U	G	G	U	G	C	A	U	G
SSU_1322	No assigned SNORD
SSU_1383	SNORD30	D'	CUGA	CUGA	AUGAUGA	CUGUUGA	7	25045640-25045710	intronic	pos	AL954715.1	U	G	C	U	U	G	C	U	C	U	G	A								A	C	G	A	A	C	G	A	G	A	C	U
SSU_1442	SNORD61	D	CUGA	CUGU	GUGAUGA	UUGUUGU	14	31860407-31860436	intronic	rev	rbmx	U	U	G	A	A	G	A	A	U	C	U	C	C							A	A	C	U	U	C	U	U	A	G	A	G	G
SSU_1490	SNORD25	D'	CUGA	CUGA	AUGAUGA	GUGAUUG	7	25042433-25042498	intronic	pos	AL954715.1	A	U	G	U	C	C	A	G	A	C	A	C	U							A	A	C	A	G	G	U	C	U	G	U	G	A
SSU_1637	No assigned SNORD
SSU_1678	SNORD82	D'	CUGA	CUGA	AUGAUGA	AUGAUGU	22	36683988-36684054	intronic	rev	ncl	A	U	A	A	U	U	C	A	G	G	G	A									A	U	U	A	A	G	U	C	C	C	U
SSU_1703	SNORD43	D'	CUGA	CAUA	UUGAUGA	AUGAGCC	3	29869820-29869889	intronic	rev	rpl3	A	G	G	C	G	G	G	C	A	G	C	U								A	C	C	G	C	C	C	G	U	C	G	U
LSU_389	SNORD26	D'	CUGA	CUGA	AUGAUGA	UUGAUGU	7	25044246-25044315	intronic	pos	AL954715.1	C	U	U	C	U	C	U	C	U	U	A	A	G							G	A	A	G	A	G	A	G	A	G	U	U	C
LSU_391	SNORD81	D'	CUGA	CUGA	AUGAUGA	CUGAUGU	20	2735329-2735398	intronic	pos	syncrip	U	C	U	C	U	C	U	C	A	A	G	U								A	G	A	G	A	G	A	G	U	U	C	A
LSU_1303	SNORD21	D	CUGA	CUGA	AUGAUGA	CUGAUGU	6	29089559-29089639	intronic	pos	rpl5b	A	G	G	G	C	A	G	A	A	C	U	U	U								C	C	C	G	U	C	U	U	G	A	A	A
LSU_1310	SNORD126	D'	CUGA	CUGA	AUGAUGA	GUCAUGA	2	37814675-37814741	?	rev	?	C	A	C	U	U	U	G	U	G	C	C	U	G								U	G	A	A	A	C	A	C	G	G	A	C
LSU_1313	SNORD18	D'	CUGA	CUGA	AUGAUGA	GUGAUUG	18	19451583-19451652	intronic	rev	rpl4	U	U	U	G	U	G	C	C	U	G	G									A	A	A	C	A	C	G	G	A	C	C
LSU_1509	SNORD2	D'	CUGA	CUGA	GUGAUGC	AUGGAGA	2	7723871-7723941	intronic	pos	eif4a2	A	G	G	G	C	U	U	U	C	U	A	C									C	C	C	G	A	A	A	G	A	U	G
LSU_1511	SNORD51	D'	CUGA	CUGA	GUGAUGA	GUGAUGG	6	13204717-13204774	intronic	rev	eef1b2	A	G	C	U	U	U	C	U	A	C	C	A	C	U							C	G	A	A	A	G	A	U	G	G	U	G	A
LSU_1521	SNORD77	D'	CUGA	CAGA	AUGAUGA	AUGUAGA	8	16611344-16611407	intronic	rev	gas5	G	A	C	U	U	G	A	U	A	C	G										U	G	A	A	C	U	A	U	G	C
LSU_1612	SNORD80	D	CUGA	CUGA	AUGAUGA	AUGUAGA	8	16611119-16611192	intronic	rev	gas5	G	A	U	C	C	U	C	G	C	U	U	U	C	U	G						U	A	G	G	G	G	C	G	A	A	A	G	A	C
LSU_1858	SNORD38	D'	CUGA	CUGA	AUGAUGA	AUGGUGG	2	26501347-26501416	intronic	pos	rps8a	A	U	C	G	U	C	U	U	G	A	C	C	A								A	G	C	A	G	A	A	C	U	G	G	U
LSU_2338	SNORD24	D	CUGA	CUUA	AUGAUGU	AUGCACA	5	33286616-33286659	intronic	rev	rpl7a	G	C	U	A	G	A	A	C	C	A	C	C									G	A	U	C	U	U	G	G	U	G	G
LSU_2350	SNORD76	D'	CUGA	UUGA	AUGAUGA	AUGUGAU	8	16612181-16612255	intronic	pos	gas5	C	U	C	A	U	C	G	U	U	U	A	U									A	G	U	A	G	C	A	A	A	U	A
LSU_2361	SNORD76 (+6 modifcation)
LSU_2352	SNORD24	D'	CUGA	CUGA	AUGAUGU	AUGCGGA	5	33285527-33285597	intronic	rev	rpl7a	U	A	U	C	G	U	U	U	A	U	A	A	G								U	A	G	C	A	A	A	U	A	U	U	C
LSU_2402	SNORD143	D'	AUGA	AUGA	GUGAUUA	GUGAUUU	9	21443526-21443597	intronic	rev	zmym2	C	U	A	C	A	C	U	U	G	U	C	G	U	C	A					C	A	U	G	U	G	A	A	C	A	G	C	A	G	U
LSU_2411	SNORD6	D'	CUGA	CUUA	AUGAUGA	AUGAAAG	5	61,351,920-61,351,995	intronic	pos	si:ch211-209a2.1	U	C	G	U	C	A	A	C	U	U	G	U	A							A	G	C	A	G	U	U	G	A	A	C	A	U
LSU_2774	SNORD99	D	CUGA	GUGA	AUGAUAG	AUGAAAC	19	16027416-16027487	intronic	rev	ctps1a	A	G	G	G	U	A	U	A	G	G	C	G	U								C	C	C	A	U	A	U	C	C	G	C	A
LSU_2791	SNORD55	D	CUGA	CCGA	AUGAUGA	AUGCGGA	2	26499345-26499412	intronic	pos	rps8a	A	A	G	A	G	G	U	U	C	C	A	C									U	C	U	C	C	A	A	G	G	U	G
LSU_2802	SNORD95	D	CUGA	CUGU	GUGAUGA	AUGAUAA	14	6947411-6947471	intronic	pos	rack1	U	U	U	G	U	C	G	G	A	G	A										A	A	C	A	G	C	C	U	C	U
LSU_2817	No assigned SNORD
LSU_2824	SNORD34	D'	CUGA	UUGA	AUGAUGC	GUGAUGA	17	24617207-24617275	intronic	pos	rpl13a	U	G	U	U	C	C	G	U	C	U	U									A	C	A	A	G	G	C	A	G	A	G
LSU_2848	SNORD50A	D	CUGA	CUGA	GUGAUGA	CCCAUCU	17	24616930-24617003	intronic	pos	rpl13a	A	U	C	A	G	U	C	U	A	G	G	C	A	U							A	G	U	C	A	G	A	U	C	C	G	U	A
LSU_2863	SNORD50B	D'	CUGA	CUGA	GUGAUGA	UUGCUGA	17	24616631-24616704	intronic	pos	rpl13a	U	A	A	G	C	C	C	U	A	U	U	U	C								U	U	C	G	G	G	A	U	A	A	G	G
LSU_3606	SNORD201	D'	CUGA	CACA	AUGAUGA	AUGAGUG	23	31433272-31433345	intronic	pos	rps12	U	U	C	C	C	C	A	U	A	G	G	C								C	A	G	G	G	G	A	A	U	C	C	G	A
LSU_3680	SNORD88	D'	CUGA	CUGA	GUGAUGU	GUGUAGA	3	30694787-30694867	intronic	pos	BX682556	U	C	G	G	G	U	C	A	C	G	A										G	C	C	C	A	G	U	G	C	U
LSU_3697	SNORD37	D'	CUGA	CUGA	AUGAUGA	GUGAUGA	22	20151923-20151967	intronic	pos	eef2a.2	C	A	G	U	U	U	C	A	C	U	U	C	U	U						G	U	C	A	A	A	G	U	G	A	A	G	A	A
LSU_3703	SNORD36	D'	CUGA	CUGA	AUGAUGU	GUGUGGU	5	33284557-33284626	intronic	rev	rpl7a	C	A	C	U	U	C	U	U	U	A	A	G	U							G	U	G	A	A	G	A	A	A	U	U	C	A
LSU_3723	SNORD87	D'	CUGA	CAGA	AUGAUGA	AUGCUGA	24	23746607-23746682	intronic	pos	MCMDC2	U	A	C	C	C	A	U	U	U	G	C	C	G	C	U	U	U	C	A	G	C	G	G	G	U	A	A	A	C	G	G	C	G	G	G	A	G	U
LSU_3739	SNORD46	D'	CUGA	CUGA	GUGAUGU	AUGUUAG	2	26499652-26499750	intronic	pos	rps8	A	C	A	U	U	G	A	U	A	C	U	G									G	U	A	A	C	U	A	U	G	A	C
LSU_3764	SNORD15	D	CUGA	CGGA	GUGAUGA	GUGAGUC	18	3044053-3044201	intronic	pos	rps3	U	G	U	U	U	A	C	G	G	A	G										C	A	A	A	U	G	C	C	U	C
LSU_3771	SNORD15	D'	CUGA	CGGA	GUGAUGA	GUGAGUC	18	3044053-3044201	intronic	pos	rps3	U	G	A	G	C	A	G	U	A	G										C	C	U	C	G	U	C	A	U	C
LSU_3787	SNORD10	D'	CUGA	CUGA	GUGAUGA	AUGUCUG	7	26513824-26513959	intronic	rev	eif4a1	A	A	C	U	G	U	G	C	G	U	A	C									U	G	A	C	G	C	G	C	A	U	G
LSU_3797	SNORD17	D'	CUGA	CCGA	GUGAUGA	CUGCAGU	21	43703825-43703925	intronic	pos	dkc1	G	C	U	U	A	C	C	U	A	U	U	U	G							U	G	A	A	U	G	G	A	U	G	A	A	C
LSU_3804	SNORD30	D'	CUGA	CUGA	AUGAUGA	CUGUUGA	7	25045640-25045710	intronic	pos	AL954715.1	U	G	C	U	U	G	C	U	C	U	G	A	C	G						A	U	G	A	A	C	G	A	G	A	U	U	C	C
LSU_3809	SNORD79	D'	CUGA	CUGA	AUGAUGA	CUGAUUA	8	16611954-16612014	intronic	rev	gas5	U	C	U	C	U	A	A	G	G	G	U	A	A	C	A						G	A	G	A	U	U	C	C	C	A	C	U	G	U
LSU_3820	SNORD74	D'	CUGA	CUGA	AUGAUGA	CUGAUGA	8	16613034-16613103	intronic	rev	gas5	C	A	C	A	G	G	G	A	U	G	G										U	G	U	C	C	C	U	A	C	C
LSU_3848	SNORD53A	D	CUGA	CUGA	GUGAUGA	AUGAGAG	17	11398080-11398136	intronic	rev	arid4a	U	G	U	C	G	G	U	U	C	U	C	U	U							A	C	A	G	C	C	A	A	G	G	G	A	A	C
LSU_3866	SNORD47	D'	CUGA	AUGA	GUGAUGA	AUGAUUA	8	16610249-16610318	intronic	rev	gas5	A	A	C	C	G	U	C	U	U	A	G	U								U	U	G	G	C	A	G	A	A	U	C	A
LSU_3878	SNORD12	D'	CUGA	CAGA	AUGAUGA	AUAGUGU	11	7150611-7150633	intronic	pos	si:zfos-1451h6.1	G	A	C	C	C	C	U	U	U	U	U	U	C								C	G	G	G	G	A	A	A	G	A	A	G
LSU_3904	SNORD52	D'	CUGA	CUGA	GUGAUGA	AUGAAGA	19	27464415-27464484	intronic	rev	FP101887	U	C	U	G	A	G	A	U	C	A	G	A									G	A	C	U	C	U	A	G	U	C	U
LSU_3916	SNORD202	D	CUGA	CUGA	AUGAUGA	AUCAUGA	19	27468691-27468751	intronic	rev	FP101887.1	A	C	G	U	G	A	C	A	C	U	U	C	U	C							G	C	A	C	U	G	U	G	A	A	G	A	G
LSU_3923	SNORD111	D'	CUGA	CUGA	AUGAUGA	GUGAAGA	18	18570888-18570957	intronic	rev	sf3b3	U	C	U	U	C	U	C	U	G	U	A	C	U	U	C						G	A	A	G	A	G	A	C	A	U	G	A	G	G
LSU_4032	SNORD75	D'	CUGA	CAGG	AUGAUGA	CUGAUAA	8	16612548-16612618	intronic	rev	gas5	A	G	G	U	G	A	U	G	A	G	A	A	U	A							C	C	A	C	U	A	C	U	C	U	U	A	U
LSU_4166	SNORD31	D'	CUGA	CUGA	AUGAUGA	GUUAUGA	7	25046350-25046421	intronic	pos	AL954715.1	G	G	A	C	C	C	C	G	C	C	A	U									C	U	G	G	G	G	C	G	G	U	A
LSU_4197	SNORD58	D'	CUGA	CUGA	AUGAUGA	AUGAAGA	21	19067284-19067342	intronic	pos	rpl17	C	U	C	C	A	C	A	G	G	A	U	U	C								A	G	G	U	G	U	C	C	U	A	A	G
LSU_4198	SNORD58 (+6 modifcation)
LSU_4272	SNORD203	D	CUGA	CUGA	AUGAUGA	CUGAUGC	21	11967157-11967212	intronic	pos	nop56	A	A	A	A	A	G	U	C	A	U	A	U	U	U							U	U	U	U	C	A	G	U	A	U	G	A	G
LSU_4276	SNORD41	D	CUGA	GUGA	GUGAUGA	CAAGUAU	3	18819705-18819775	intronic	pos	tnpo2	U	G	U	C	A	U	A	C	U	U	A	U	G								C	A	G	U	A	U	G	A	G	U	A	C
LSU_4340	SNORD60	D'	CUGA	AUGA	AUGAUGA	GCAGUGA	1	7920119-7920205	intronic	rev	cr855320.6	U	G	C	U	C	C	A	C	A	G	U	C	U	U	U	U					G	G	A	G	G	U	G	U	C	A	G	A	A	A	A
LSU_4362	SNORD1	D'	CUGA	CUGA	GUGAUGA	GUGGACU	unknown	KN149795.1:17237-17296	intronic	rev	CABZ01078601.2	U	G	U	C	C	C	U	A	U	U	G	A								A	C	A	G	G	G	A	U	A	A	C	U
LSU_4426	SNORD49	D'	CUGA	CUGA	GUGAUGA	CUGACGA	unknown	KN149795.1:21189-21266	intronic	rev	LOC100535890	U	G	C	C	G	A	G	A	A	G	G	A	U	A							C	G	G	C	U	C	U	U	C	C	U	A	U
LSU_4464	SNORD69	D	CUGA	CUGA	AUGAUGA	CUGACGA	11	3966080-3966142	intronic	pos	gnl3	A	C	A	A	C	C	U	A	A	C										C	G	U	U	G	G	A	U	U	G	U	U
LSU_4468	Spb1 (yeast)
LSU_4469	Spb1 (yeast)
LSU_4493	SNORD29	D'	CUGA	UUGA	GUGAUGA	AUGUGAA	7	25045186-25045244	intronic	pos	AL954715.1	U	C	A	C	U	C	G	A	U	U	C	A	A	A							G	U	G	A	G	C	U	G	G	G	U	U	U
LSU_4506	SNORD35	D'	CUGA	CUGA	GUGAUGU	GAGAUGA	3	37788477-37788553	intronic	pos	rps11	U	U	C	U	G	G	U	A	G	C	A	C	U	C	U						A	G	A	C	C	G	U	C	G	U	G	A	G	A
LSU_4560	SNORD119	D	CUGA	CUGA	GUGAUGA	AUGACGA	6	57479094-57479167	intronic	rev	snrpb	A	C	A	U	U	A	G	G	A	C	G	A									G	U	A	A	U	C	C	C	G	C	U
LSU_4590	SNORD72	D'	CUGA	AUGA	GUGAUGU	AUGAGUG	21	5198832-5198898	intronic	rev	rpl37	A	A	C	A	A	G	U	C	U	G	U	A	A	A							G	G	U	U	C	A	G	A	C	A	U	U	U
LSU_4593	SNORD78	D'	CUGA	CUGA	GUGAUGC	GUGUGGA	8	16610462-16610525	intronic	rev	gas5	C	A	G	U	C	U	G	U	A	A	A	C									U	C	A	G	A	C	A	U	U	U	G
LSU_4983	NET3	D'	CUGA	CUGA	GUGAUGA	UUGAGGA	8	16610893-16610953	intronic	rev	gas5	U	C	U	G	G	A	C	U	A	A	G										G	A	C	C	U	G	A	U	U	C
5.8S_8	SNORD204	D	CUGA	CUGA	AUGAUGA	CUGACAG	20	2736833-2736906	intronic	pos	syncrip	U	A	G	A	A	U	C	G	C	C	A										U	C	U	U	A	G	C	G	G	U
5.8S_14	SNORD71	D'	CUGA	CAGA	GUGAUGA	CUGUUGA	7	69325155-69325226	intronic	rev	ap1g1	G	G	C	U	A	C	C	U	A	G	U	G	A	G							C	G	G	U	G	G	A	U	C	A	C	U	C
5.8S_75	SNORD96	D	AUGA	CUGA	GUGAUUU	CUCUUGA	14	6950804-6950878	intronic	pos	Rack1	U	U	A	A	C	G	U	C	C	U	G									A	A	U	U	G	C	A	G	G	A	C	A	C
[truncated: 20 more columns]

## Sheet: Additional SNORD family members
Additional SNORD family members found by BLASTN search against the zebrafish genome (GRCz11) using http://www.ensembl.org/Multi/Tools/Blast
Nucleotide		Box D/D'			Box C/C'		Genomic informations					SNORD(3'-5')																			rRNA(5'-3')
Human #	SNORD	Usage	D	D'	C	C'	Chr	Location	Type	Strand	Host gene	1	2	3	4	5	6	7	8	9	10	11	12	13	14	15	16	17	18	19	1	2	3	4	5	6	7	8	9	10	11	12	13	14	15	16	17	18	19
SSU_354	SNORD90	D'	CUGA	CUGA	AUGAUGA	GUGGGGG	10	9642505-9642575	intronic	pos	rc3h2	U	U	A	G	A	C	G	G	G	A	U	A									G	U	C	U	G	C	C	C	U	A	U
Homolog_1		D'	CUGA	CUGA	AUGAUGA		10	9643177-9643234	intronic	pos	rc3h2	U	U	A	G	A	C	G	G	G	A	U	A									G	U	C	U	G	C	C	C	U	A	U
SSU_462	SNORD14	D	CUGA	CAGA	AUGAUGA	AUGGUCC	10	29851001-29851093	intronic	pos	hspa8	U	G	U	A	G	G	U	U	C	C	U	U	C	C						A	C	A	U	C	C	A	A	G	G	A	A	G	G
Homolog_1		D	CUGA	CAGA	AUGAUGA	AUGGCCC	10	29850573-29850665	intronic	pos	hspa8	U	G	U	A	G	G	U	U	C	C	U	U	C	C						A	C	A	U	C	C	A	A	G	G	A	A	G	G
Homolog_2		D	CUGA	CAGA	AUGAUGA	AUGGCCC	10	29852148-29852240	intronic	pos	hspa8	U	G	U	A	G	G	U	U	C	C	U	U	C	C						A	C	A	U	C	C	A	A	G	G	A	A	G	G
Homolog_3		D	CUGA	CAGA	AUGAUGA	AUGGCCC	10	29851391-29851483	intronic	pos	hspa8	U	G	U	A	G	G	U	U	C	C	U	U	C	C						A	C	A	U	C	C	A	A	G	G	A	A	G	G
SSU_484	SNORD16	D'	CUGA	CCUA	AUGAUGG	GUGACAG	18	19455182-19455241	intronic	rev	rpl4	U	G	C	G	U	U	U	A	A	U	G									G	C	G	C	A	A	A	U	U	A	C
Homolog_1		D'	CUGA	CCUA	GUGAUGG	GCGACAG	18	19454486-19454583	intronic	rev	rpl4	U	G	C	G	U	U	U	A	A	U	G									G	C	G	C	A	A	A	U	U	A	C
SSU_1442	SNORD61	D	CUGA	CUGU	GUGAUGA	UUGUUGU	14	31860407-31860436	intronic	rev	rbmx	U	U	G	A	A	G	A	A	U	C	U	C	C							A	A	C	U	U	C	U	U	A	G	A	G	G
Homolog_1		D	CUGA	CUGU	GUGAUGA	UUGAUUG	14	31860440-31860471	intronic	rev	rbmx	U	U	G	A	A	G	A	A	U	C	U	C	C							A	A	C	U	U	C	U	U	A	G	A	G	G
LSU_2338	SNORD24	D	CUGA	CUUA	AUGAUGU	AUGCACA	5	33286616-33286659	intronic	rev	rpl7a	G	C	U	A	G	A	A	C	C	A	C	C									G	A	U	C	U	U	G	G	U	G	G
Homolog_1		D	CUGA	CUUA	AUGAUGU	AUGCAGA	5	33286589-33286606	intronic	rev	rpl7a	G	C	U	A	G	A	A	C	C	A	C	C									G	A	U	C	U	U	G	G	U	G	G
LSU_2863	SNORD50B	D'	CUGA	CUGA	GUGAUGA	UUGCUGA	17	24616631-24616704	intronic	pos	rpl13a	U	A	A	G	C	C	C	U	A	U	U	U	C								U	U	C	G	G	G	A	U	A	A	G	G
Homolog_1		D'	CUGA	CUGA	GUGAUGA	UUGCUGA	17	24616930-24617003	intronic	pos	rpl13a	U	A	A	G	C	C	C	U	A	U	U	U	C								U	U	C	G	G	G	A	U	A	A	G	G
LSU_3697	SNORD37	D'	CUGA	CUGA	AUGAUGA	GUGAUGA	22	20151923-20151967	intronic	pos	eef2a.2	C	A	G	U	U	U	C	A	C	U	U	C	U	U						G	U	C	A	A	A	G	U	G	A	A	G	A	A
Homolog_1		D'	CUGA	CUGA	AUGAUGA	GUGAUGA	22	20139525-20139592	intronic	pos	eef2a.1	C	A	G	U	U	U	C	A	C	U	U	C	U	U						G	U	C	A	A	A	G	U	G	A	A	G	A	A
LSU_3723	SNORD87	D'	CUGA	CAGA	AUGAUGA	AUGCUGA	24	23746607-23746682	intronic	pos	MCMDC2	U	A	C	C	C	A	U	U	U	G	C	C	G	C	U	U	U	C	A	G	C	G	G	G	U	A	A	A	C	G	G	C	G	G	G	A	G	U
Homolog_1		D'	CUGA	CAGA	AUGAUGA	UUGCUGA	24	23746191-23746266	intronic	pos	MCMDC2	U	A	C	C	C	A	U	U	U	G	C	C	G	C	U	U	U	C	A	G	C	G	G	G	U	A	A	A	C	G	G	C	G	G	G	A	G	U
LSU_3764	SNORD15	D	CUGA	CGGA	GUGAUGA	GUGAGUC	18	3044053-3044201	intronic	pos	rps3	U	G	U	U	U	A	C	G	G	A	G										C	A	A	A	U	G	C	C	U	C
Homolog_1		D	CUGA	CGGA	GUGAUGA	GUGAGUC	18	3040275-3040419	intronic	pos	rps3	U	G	U	U	U	A	C	G	G	A	G										C	A	A	A	U	G	C	C	U	C
Homolog_2		D	CUGA	CGGA	GUGAUGA	GUAAGUC	18	3047004-3047146	intronic	pos	rps3	U	G	U	U	U	A	C	G	G	A	G										C	A	A	A	U	G	C	C	U	C
Homolog_3		D	CUGA	CGGA	GUGACGA	GUCCUCU	18	3049558-3049594	intronic	pos	rps3	U	G	U	U	U	A	C	G	G	A	G										C	A	A	A	U	G	C	C	U	C
Homolog_4		D	CUGA	CGGA	GUGACGA	GUCCUCU	18	3049516-3049543	intronic	pos	rps3	U	G	U	U	U	A	C	G	G	A	G										C	A	A	A	U	G	C	C	U	C
Homolog_5		D	CUGA	CGGA	GUGACGA	GUCCUCU	18	3049629-3049656	intronic	pos	rps3	U	G	U	U	U	A	C	G	G	A	G										C	A	A	A	U	G	C	C	U	C
LSU_3848	SNORD53A	D	CUGA	CUGA	AUGAUGA	GUGAUGU	17	11398080-11398136	intronic	rev	arid4a	U	G	U	C	G	G	U	U	C	U	C	U	U							A	C	A	G	C	C	A	A	G	G	G	A	A	C
Homolog_1		D	CUGA	CUGA	AUGAUGA	GUGAUGU	17	11395027-11395105	intronic	rev	arid4a	U	G	U	C	G	G	U	U	C	U	C	U	U							A	C	A	G	C	C	A	A	G	G	G	A	A	C
Homolog_2		D	CUGA	CUGA	AUGAUGA	GUGAUGU	17	11390220-11390298	intronic	rev	arid4a	U	A	U	C	G	G	U	U	C	U	C	U	U							A	C	A	G	C	C	A	A	G	G	G	A	A	C
Homolog_3		D	CUGA	CUGA	GUGAUGA	GUGAUGU	17	11386861-11386939	intronic	rev	arid4a	U	A	U	C	G	G	U	U	C	U	C	U	U							A	C	A	G	C	C	A	A	G	G	G	A	A	C
LSU_3848	SNORD53B	D	CUGA	CUGA	AUGAUGA	GUGAUGU	17	11400583-11400665	intronic	rev	arid4a	U	G	U	C	G	G	U	U	C	U	C	U	U							A	C	A	G	C	C	A	A	G	G	G	A	A	C
Homolog_1		D	CUGA	CUGA	AUGAUGA	GUGAUGU	17	11395028-11395067	intronic	rev	arid4a	U	G	U	C	G	G	U	U	C	U	C	U	U							A	C	A	G	C	C	A	A	G	G	G	A	A	C
Homolog_2		D	CUGA	CUGA	AUGAUGA	GUGAUGU	17	11390221-11390260	intronic	rev	arid4a	U	A	U	C	G	G	U	U	C	U	C	U	U							A	C	A	G	C	C	A	A	G	G	G	A	A	C
Homolog_3		D	CUGA	CUGA	AUGAUGA	GUGAUGU	17	11395075-11395103	intronic	rev	arid4a	U	G	U	C	G	G	U	U	C	U	C	U	U							A	C	A	G	C	C	A	A	G	G	G	A	A	C
Homolog_4		D	CUGA	CUGA	AUGAUGA	GUGAUGU	17	11390269-11390294	intronic	rev	arid4a	U	A	U	C	G	G	U	U	C	U	C	U	U							A	C	A	G	C	C	A	A	G	G	G	A	A	C
LSU_3866	SNORD47	D'	CUGA	AUGA	GUGAUGA	AUGAUUA	8	16610249-16610318	intronic	rev	gas5	A	A	C	C	G	U	C	U	U	A	G	U								U	U	G	G	C	A	G	A	A	U	C	A
Homolog_1		D'	CUGA	AUGA	GUGAUGA	AUGAUUA	8	16609992-16610059	intronic	rev	gas5	A	A	C	C	G	U	C	U	U	A	G	U								U	U	G	G	C	A	G	A	A	U	C	A
LSU_3916	SNORD202	D	CUGA	CUGA	AUGAUGA	AUCAUGA	19	27468691-27468751	intronic	rev	FP101887.1	A	C	G	U	G	A	C	A	C	U	U	C	U	C							G	C	A	C	U	G	U	G	A	A	G	A	G
Homolog_1		D	CUGA	CUGA	AUGAUGA	UCCAUGA	19	27465106-27465170	intronic	rev	FP101887.1	A	C	G	U	G	A	C	A	C	U	U	C	U	C							G	C	A	C	U	G	U	G	A	A	G	A	G
Homolog_2		D	CUGA	CUGA	AUGAUGA	AGAAUGA	19	27467936-27468000	intronic	rev	FP101887.1	A	C	G	U	G	A	C	A	C	U	U	C	U	C							G	C	A	C	U	G	U	G	A	A	G	A	G
Homolog_3		D	CUGA	CUGA	AUGAAUC	UCCAUGA	19	27468451-27468509	intronic	rev	FP101887.1	A	C	G	U	G	A	C	A	C	U	U	C	U	C							G	C	A	C	U	G	U	G	A	A	G	A	G
LSU_3923	SNORD111	D'	CUGA	CUGA	AUGAUGA	GUGAAGA	18	18570888-18570957	intronic	rev	sf3b3	U	C	U	U	C	U	C	U	G	U	A	C	U	U	C						G	A	A	G	A	G	A	C	A	U	G	A	G	G
Homolog_1		D'	CUGA	CUGA	AUGAUGA	GUGAAGA	18	18569250-18569317	intronic	rev	sf3b3	U	C	U	U	C	U	C	U	G	U	A	C	U	U	C						G	A	A	G	A	G	A	C	A	U	G	A	G	G
LSU_4340	SNORD60	D'	CUGA	AUGA	AUGAUGA	GCAGUGA	1	7920119-7920205	intronic	rev	cr855320.6	U	G	C	U	C	C	A	C	A	G	U	C	U	U	U	U					G	G	A	G	G	U	G	U	C	A	G	A	A	A	A
Homolog_1		D'	CUGA	AUGA	AUGAUGA	GCAGUGA	KN150173	15939-16022	intronic	rev	CABZ01000633.2	U	G	C	U	C	C	A	C	A	G	U	C	U	U	U	U					G	G	A	G	G	U	G	U	C	A	G	A	A	A	A
Homolog_2		D'	CUGA	AUGA	CUGAUGA	GCAGUGA	KN150173	15262-15345	intronic	rev	CABZ01000633.1	U	G	C	U	C	C	A	C	A	G	U	C	U	U	U	U					G	G	A	G	G	U	G	U	C	A	G	A	A	A	A
Homolog_3		D'	CUGA	AUGA	CUGAUGA	GCAGUGA	1	7919483-7919566	intronic	rev	CR855320.5	U	G	C	U	C	C	A	C	A	G	U	C	U	U	U	U					G	G	A	G	G	U	G	U	C	A	G	A	A	A	A
Homolog_4		D'	CUGA	AUGA	CUGAUGA	GCAGUGA	1	7918798-7918881	intronic	rev	CR855320.4	U	G	C	U	C	C	A	C	A	G	U	C	U	U	U	U					G	G	A	G	G	U	G	U	C	A	G	A	A	A	A
Homolog_5		D'	CUGA	AUGA	CUGAUGA	GCAGUGA	KN150173	14574-14649	intronic	rev	CABZ01000633.3	U	G	C	U	C	C	A	C	A	G	U	C	U	U	U	U					G	G	A	G	G	U	G	U	C	A	G	A	A	A	A
LSU_4590	SNORD72	D'	CUGA	AUGA	GUGAUGU	AUGAGUG	21	5198832-5198898	intronic	rev	rpl37	A	A	C	A	A	G	U	C	U	G	U	A	A	A							G	G	U	U	C	A	G	A	C	A	U	U	U
Homolog_1		D'	CUGA	AUGA	GUGAUGU	AUGAGUG	21	5199987-5200054	intronic	rev	rpl37	A	A	C	A	A	G	U	C	U	G	U	A	A	A							G	G	U	U	C	A	G	A	C	A	U	U	U
[truncated: 20 more columns]
